# Supplementary material for: Quantify single nucleotide polymorphism (SNP) ratio in pooled DNA based on normalized fluorescence real-time PCR
Source: PubMed Central journal article supplement (PMC1552069; doi:10.1186/1471-2164-7-143), 2006-06-09

| FAM | Well | Ct    | average Ct of each allele | VIC | Well | Ct    | average Ct of each allele | $\Delta Ct$ | $2^{-\Delta Ct}$ | Av.( $2^{-\Delta Ct}$ ) | SD. ( $2^{-\Delta Ct}$ ) | predefined ratio |
|-----|------|-------|---------------------------|-----|------|-------|---------------------------|-------------|------------------|-------------------------|--------------------------|------------------|
|     | A7   | 30.34 |                           |     | A7   | 31.53 |                           | -1.19       | 2.28             |                         |                          |                  |
|     | A8   | 30.01 |                           |     | A8   | 31.30 |                           | -1.29       | 2.45             | 2.26                    | 0.86                     | 9.00             |
|     | A9   | 29.87 |                           |     | A9   | 31.55 |                           | -1.68       | 3.21             |                         |                          |                  |
|     | B2   | 30.59 | 30.20                     |     | B2   | 30.76 | 31.29                     | -0.17       | 1.13             |                         |                          |                  |
|     | B4   | 30.43 |                           |     | B4   | 31.17 |                           | -0.74       | 1.67             | 1.77                    | 0.36                     | 4.00             |
|     | B5   | 30.31 |                           |     | B5   | 30.69 |                           | -0.39       | 1.31             |                         |                          |                  |
|     | B6   | 30.24 |                           |     | B6   | 31.29 |                           | -1.06       | 2.08             |                         |                          |                  |
|     | B8   | 30.20 | 30.29                     |     | B8   | 31.23 | 31.10                     | -1.03       | 2.04             |                         |                          |                  |
|     | B9   | 30.35 |                           |     | B9   | 31.05 |                           | -0.70       | 1.63             |                         |                          |                  |
|     | C3   | 30.66 |                           |     | C3   | 31.16 |                           | -0.50       | 1.41             | 1.53                    | 0.15                     | 2.33             |
|     | C4   | 30.63 |                           |     | C4   | 31.39 |                           | -0.76       | 1.70             |                         |                          |                  |
|     | C5   | 30.64 | 30.57                     |     | C5   | 31.11 | 31.18                     | -0.47       | 1.39             |                         |                          |                  |
|     | C6   | 30.47 |                           |     | C6   | 30.79 |                           | -0.31       | 1.24             | 1.25                    | 0.09                     | 1.50             |
|     | C7   | 30.43 |                           |     | C7   | 30.64 |                           | -0.21       | 1.16             |                         |                          |                  |
|     | C8   | 30.48 |                           |     | C8   | 30.77 |                           | -0.29       | 1.23             |                         |                          |                  |
|     | C9   | 30.42 | 30.45                     |     | C9   | 30.88 | 30.77                     | -0.46       | 1.38             |                         |                          |                  |
|     | D3   | 30.94 |                           |     | D3   | 30.60 |                           | 0.35        | 0.79             |                         |                          |                  |
|     | D4   | 31.84 |                           |     | D4   | 30.59 |                           | 1.25        | 0.42             | 0.82                    | 0.26                     | 1.00             |
|     | D5   | 30.53 |                           |     | D5   | 30.72 |                           | -0.19       | 1.14             |                         |                          |                  |
|     | D6   | 31.06 |                           |     | D6   | 30.86 |                           | 0.21        | 0.87             |                         |                          |                  |
|     | D7   | 30.96 | 31.07                     |     | D7   | 30.79 | 30.71                     | 0.17        | 0.89             |                         |                          |                  |
|     | D8   | 31.10 |                           |     | D8   | 30.76 |                           | 0.34        | 0.79             |                         |                          |                  |
|     | D9   | 31.12 |                           |     | D9   | 30.67 |                           | 0.45        | 0.73             | 0.70                    | 0.09                     | 0.67             |
|     | E2   | 30.92 |                           |     | E2   | 30.29 |                           | 0.64        | 0.64             |                         |                          |                  |
|     | E3   | 31.14 |                           |     | E3   | 30.75 |                           | 0.38        | 0.77             |                         |                          |                  |
|     | E4   | 31.07 | 31.07                     |     | E4   | 30.25 | 30.54                     | 0.82        | 0.57             |                         |                          |                  |
|     | E5   | 31.30 |                           |     | E5   | 30.37 |                           | 0.93        | 0.52             |                         |                          |                  |
|     | E6   | 31.89 |                           |     | E6   | 30.57 |                           | 1.33        | 0.40             | 0.48                    | 0.05                     | 0.43             |
|     | E7   | 31.71 |                           |     | E7   | 30.59 |                           | 1.12        | 0.46             |                         |                          |                  |
|     | E8   | 31.31 |                           |     | E8   | 30.40 |                           | 0.92        | 0.53             |                         |                          |                  |
|     | E9   | 31.37 | 31.52                     |     | E9   | 30.36 | 30.46                     | 1.02        | 0.49             |                         |                          |                  |
|     | F2   | 31.84 |                           |     | F2   | 30.27 |                           | 1.57        | 0.34             | 0.39                    | 0.05                     | 0.25             |
|     | F3   | 31.89 |                           |     | F3   | 30.35 |                           | 1.54        | 0.34             |                         |                          |                  |
|     | F4   | 31.58 |                           |     | F4   | 30.22 |                           | 1.36        | 0.39             |                         |                          |                  |
|     | F5   | 31.58 |                           |     | F5   | 30.27 |                           | 1.31        | 0.40             |                         |                          |                  |
|     | F6   | 31.44 | 31.66                     |     | F6   | 30.33 | 30.29                     | 1.11        | 0.46             |                         |                          |                  |
|     | F7   | 32.86 |                           |     | F7   | 29.33 |                           | 3.53        | 0.09             |                         |                          |                  |
|     | F8   | 33.55 |                           |     | F8   | 30.23 |                           | 3.32        | 0.10             | 0.12                    | 0.03                     | 0.11             |
|     | F9   | 32.89 |                           |     | F9   | 29.93 |                           | 2.96        | 0.13             |                         |                          |                  |
|     | G2   | 32.47 |                           |     | G2   | 29.53 |                           | 2.95        | 0.13             |                         |                          |                  |
|     | G3   | 32.79 | 32.91                     |     | G3   | 30.06 | 29.82                     | 2.73        | 0.15             |                         |                          |                  |

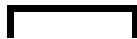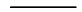

Supplement: 1471-2164-7-143-S8.pdf [file 1471-2164-7-143-S8.pdf]
