# Supplementary material for: Quantify single nucleotide polymorphism (SNP) ratio in pooled DNA based on normalized fluorescence real-time PCR
Source: PubMed Central journal article supplement (PMC1552069; doi:10.1186/1471-2164-7-143), 2006-06-09

| FAM | Well | Ct    | average Ct<br>of each allele | VIC | Well | Ct    | average Ct<br>of each allele | $\Delta Ct$ | $2^{-\Delta Ct}$ | $Av.(2^{-\Delta Ct})$ | $SD.(2^{-\Delta Ct})$ | redefined ratio |
|-----|------|-------|------------------------------|-----|------|-------|------------------------------|-------------|------------------|-----------------------|-----------------------|-----------------|
|     | C2   | 28.62 | 28.98                        |     | C2   | 31.99 | 31.54                        | -3.37       | 10.34            | 6.46                  | 3.06                  | 9.00            |
|     | C3   | 28.93 |                              |     | C3   | 31.47 |                              | -2.54       | 5.82             |                       |                       |                 |
|     | C4   | 29.20 |                              |     | C4   | 31.96 |                              | -2.76       | 6.77             |                       |                       |                 |
|     | C5   | 29.17 |                              |     | C5   | 30.72 |                              | -1.55       | 2.93             |                       |                       |                 |
|     | C6   | 29.04 |                              |     | C6   | 30.56 |                              | -1.52       | 2.87             |                       |                       |                 |
|     | C7   | 28.94 | 28.93                        |     | C7   | 30.36 | 30.38                        | -1.42       | 2.68             | 2.73                  | 0.09                  | 4.00            |
|     | C8   | 28.88 |                              |     | C8   | 30.31 |                              | -1.43       | 2.69             |                       |                       |                 |
|     | C9   | 28.86 |                              |     | C9   | 30.29 |                              | -1.43       | 2.69             |                       |                       |                 |
|     | D2   | 29.14 |                              |     | D2   | 29.64 |                              | -0.50       | 1.41             |                       |                       |                 |
|     | D3   | 29.32 |                              |     | D3   | 29.98 |                              | -0.66       | 1.58             |                       |                       |                 |
|     | D4   | 29.32 | 29.33                        |     | D4   | 29.68 | 29.86                        | -0.36       | 1.28             | 1.46                  | 0.14                  | 2.33            |
|     | D5   | 29.52 |                              |     | D5   | 30.15 |                              | -0.63       | 1.55             |                       |                       |                 |
|     | D6   | 29.38 |                              |     | D6   | 29.53 |                              | -0.15       | 1.11             |                       |                       |                 |
|     | D7   | 29.48 |                              |     | D7   | 29.53 |                              | -0.05       | 1.04             |                       |                       |                 |
|     | D8   | 29.25 |                              |     | D8   | 29.76 |                              | -0.51       | 1.42             |                       |                       |                 |
|     | D9   | 29.86 | 29.49                        |     | D9   | 29.50 | 29.58                        | 0.36        | 0.78             | 1.09                  | 0.27                  | 1.50            |
|     | E2   | 29.93 | 29.76                        |     | E2   | 29.08 | 29.13                        | 0.85        | 0.55             | 0.65                  | 0.07                  | 1.00            |
|     | E3   | 29.74 |                              |     | E3   | 29.11 |                              | 0.63        | 0.65             |                       |                       |                 |
|     | E4   | 29.67 |                              |     | E4   | 29.16 |                              | 0.51        | 0.70             |                       |                       |                 |
|     | E5   | 29.71 |                              |     | E5   | 29.18 |                              | 0.53        | 0.69             |                       |                       |                 |
|     | E6   | 29.96 |                              |     | E6   | 29.02 |                              | 0.94        | 0.52             |                       |                       |                 |
|     | E7   | 30.16 | 29.90                        |     | E7   | 29.01 | 28.94                        | 1.15        | 0.45             | 0.51                  | 0.04                  | 0.67            |
|     | E8   | 29.71 |                              |     | E8   | 28.82 |                              | 0.89        | 0.54             |                       |                       |                 |
|     | E9   | 29.76 |                              |     | E9   | 28.89 |                              | 0.87        | 0.55             |                       |                       |                 |
|     | F2   | 29.70 |                              |     | F2   | 28.45 |                              | 1.25        | 0.42             |                       |                       |                 |
|     | F3   | 30.37 |                              |     | F3   | 28.68 |                              | 1.69        | 0.31             |                       |                       |                 |
|     | F4   | 30.41 | 30.29                        |     | F4   | 28.75 | 28.60                        | 1.66        | 0.32             | 0.32                  | 0.08                  | 0.43            |
|     | F5   | 30.67 |                              |     | F5   | 28.52 |                              | 2.15        | 0.23             |                       |                       |                 |
|     | F6   | 30.36 |                              |     | F6   | 28.37 |                              | 1.99        | 0.25             |                       |                       |                 |
|     | F7   | 30.02 |                              |     | F7   | 28.33 |                              | 1.69        | 0.31             |                       |                       |                 |
|     | F8   | 29.27 |                              |     | F8   | 28.27 |                              | 1.00        | 0.50             |                       |                       |                 |
|     | F9   | 28.64 | 29.57                        |     | F9   | 28.01 | 28.25                        | 0.63        | 0.65             | 0.43                  | 0.18                  | 0.25            |
|     | G3   | 32.58 | 35.96                        |     | G3   | 27.60 | 27.94                        | 4.98        | 0.03             | 0.01                  | 0.02                  | 0.11            |
|     | G4   | 33.45 |                              |     | G4   | 27.92 |                              | 5.53        | 0.02             |                       |                       |                 |
|     | G5   | 37.81 |                              |     | G5   | 28.12 |                              | 9.69        | 0.00             |                       |                       |                 |
|     | G6   | 40.00 |                              |     | G6   | 28.13 |                              | 11.87       | 0.00             |                       |                       |                 |

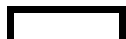

Supplement: 1471-2164-7-143-S9.pdf [file 1471-2164-7-143-S9.pdf]
