# Supplementary material for: Quantify single nucleotide polymorphism (SNP) ratio in pooled DNA based on normalized fluorescence real-time PCR
Source: PubMed Central journal article supplement (PMC1552069; doi:10.1186/1471-2164-7-143), 2006-06-09

|              |      |      |      |      |      |      |      |      |      |
|--------------|------|------|------|------|------|------|------|------|------|
| <b>YMDD</b>  | 9.00 | 8.00 | 7.00 | 6.00 | 5.00 | 4.00 | 3.00 | 2.00 | 1.00 |
| <b>YIDD</b>  | 1.00 | 2.00 | 3.00 | 4.00 | 5.00 | 6.00 | 7.00 | 8.00 | 9.00 |
| <b>ratio</b> | 9.00 | 4.00 | 2.33 | 1.50 | 1.00 | 0.67 | 0.43 | 0.25 | 0.11 |

|                            |       |       |       |       |       |        |       |        |        |
|----------------------------|-------|-------|-------|-------|-------|--------|-------|--------|--------|
| <b>Run 1 K<sub>f</sub></b> | 2.99  | 1.64  | 0.97  | 0.70  | 0.48  | 0.26   | 0.22  | 0.18   | 0.01   |
| <b>041210</b>              | 2.75  | 1.44  | 1.07  | 0.68  | 0.44  | 0.21   | 0.20  | 0.15   | 0.04   |
|                            | 2.83  |       | 0.98  | 0.66  | 0.49  | 0.37   | 0.20  | 0.10   | 0.05   |
| <b>AV.</b>                 | 2.86  | 1.54  | 1.00  | 0.68  | 0.47  | 0.28   | 0.20  | 0.14   | 0.03   |
| <b>S.D.</b>                | 0.12  | 0.14  | 0.05  | 0.02  | 0.03  | 0.08   | 0.01  | 0.04   | 0.02   |
| <b>intra C.V.</b>          | 4.38% | 9.18% | 5.40% | 2.99% | 6.06% | 28.91% | 4.70% | 29.02% | 61.69% |

|                            |       |        |       |       |        |        |        |        |        |
|----------------------------|-------|--------|-------|-------|--------|--------|--------|--------|--------|
| <b>Run 2 K<sub>f</sub></b> | 2.80  | 1.32   | 0.97  | 0.67  | 0.40   | 0.21   | 0.15   | 0.17   | 0.04   |
| <b>041211</b>              | 3.01  | 1.57   | 0.90  | 0.62  | 0.26   | 0.21   | 0.13   | 0.12   | 0.03   |
|                            | 2.68  | 1.55   | 1.03  | 0.69  | 0.22   | 0.30   | 0.13   | 0.12   | 0.02   |
|                            | 2.83  | 1.94   | 0.90  | 0.66  | 0.27   | 0.37   | 0.15   | 0.12   | 0.04   |
|                            |       |        |       |       | 0.36   | 0.22   | 0.19   | 0.11   | 0.03   |
| <b>AV.</b>                 | 2.83  | 1.60   | 0.95  | 0.66  | 0.30   | 0.26   | 0.15   | 0.13   | 0.03   |
| <b>S.D.</b>                | 0.14  | 0.26   | 0.06  | 0.03  | 0.08   | 0.07   | 0.02   | 0.02   | 0.01   |
| <b>intra C.V.</b>          | 4.90% | 16.15% | 6.66% | 4.44% | 24.75% | 27.05% | 15.97% | 18.71% | 22.86% |

|                            |      |      |      |      |      |      |      |      |      |
|----------------------------|------|------|------|------|------|------|------|------|------|
| <b>Run 3 K<sub>f</sub></b> | 2.61 | 1.28 | 0.92 | 0.57 | 0.41 | 0.30 | 0.22 | 0.14 | 0.06 |
| <b>041215</b>              | 2.61 | 1.42 | 0.91 | 0.57 | 0.41 | 0.29 | 0.22 | 0.15 | 0.06 |
|                            | 3.12 | 1.43 | 0.76 | 0.51 | 0.36 | 0.27 | 0.21 | 0.15 | 0.08 |
|                            | 2.37 | 1.45 | 0.62 | 0.52 | 0.43 | 0.33 | 0.22 | 0.15 | 0.07 |
| <b>AV.</b>                 | 2.68 | 1.40 | 0.80 | 0.54 | 0.40 | 0.30 | 0.22 | 0.15 | 0.07 |
| <b>S.D.</b>                | 0.32 | 0.08 | 0.14 | 0.03 | 0.03 | 0.02 | 0.00 | 0.01 | 0.01 |
| <b>intra C.V.</b>          | 0.12 | 0.05 | 0.17 | 0.06 | 0.07 | 0.08 | 0.02 | 0.04 | 0.10 |

|                   |       |        |        |        |        |        |        |        |        |
|-------------------|-------|--------|--------|--------|--------|--------|--------|--------|--------|
| <b>inter Av.</b>  | 2.78  | 1.50   | 0.91   | 0.62   | 0.38   | 0.28   | 0.19   | 0.14   | 0.05   |
| <b>inter S.D.</b> | 0.21  | 0.19   | 0.12   | 0.07   | 0.09   | 0.06   | 0.04   | 0.02   | 0.02   |
| <b>inter C.V.</b> | 7.69% | 12.54% | 13.64% | 10.91% | 23.71% | 20.61% | 20.19% | 17.82% | 44.25% |

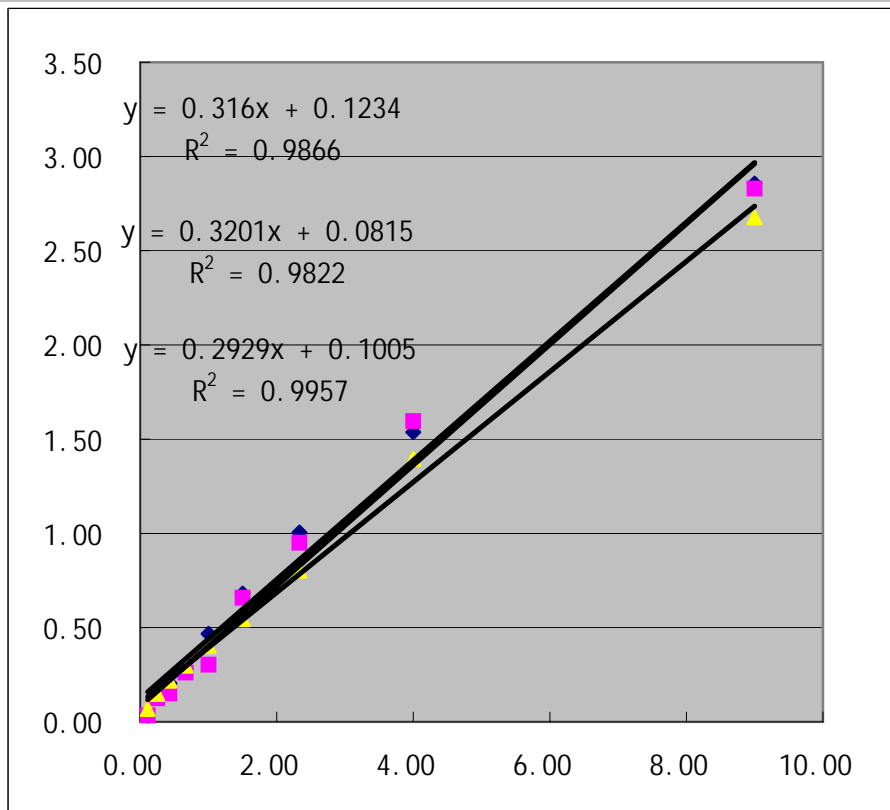

Supplement: 1471-2164-7-143-S10.pdf [file 1471-2164-7-143-S10.pdf]
