# Supplementary material for: Quantify single nucleotide polymorphism (SNP) ratio in pooled DNA based on normalized fluorescence real-time PCR
Source: PubMed Central journal article supplement (PMC1552069; doi:10.1186/1471-2164-7-143), 2006-06-09

|                   |        |        |        |        |        |        |        |        |        |
|-------------------|--------|--------|--------|--------|--------|--------|--------|--------|--------|
| <b>YMDD</b>       | 9.00   | 8.00   | 7.00   | 6.00   | 5.00   | 4.00   | 3.00   | 2.00   | 1.00   |
| <b>YIDD</b>       | 1.00   | 2.00   | 3.00   | 4.00   | 5.00   | 6.00   | 7.00   | 8.00   | 9.00   |
| <b>ratio</b>      | 9.00   | 4.00   | 2.33   | 1.50   | 1.00   | 0.67   | 0.43   | 0.25   | 0.11   |
| <b>Run 1</b>      | 5.38   | 3.07   | 2.44   | 1.28   | 0.90   | 0.41   | 0.43   | 0.37   | 0.03   |
| <b>041210</b>     | 4.46   | 3.31   | 1.79   | 1.18   | 0.81   | 0.26   | 0.41   | 0.30   |        |
|                   | 4.85   |        | 1.80   | 1.19   | 1.00   | 0.52   | 0.37   | 0.17   | 0.13   |
| <b>AV.</b>        | 4.90   | 3.19   | 2.01   | 1.21   | 0.90   | 0.40   | 0.40   | 0.28   | 0.08   |
| <b>S.D.</b>       | 0.46   | 0.17   | 0.37   | 0.05   | 0.10   | 0.13   | 0.03   | 0.10   | 0.07   |
| <b>intra C.V.</b> | 9.39%  | 5.30%  | 18.48% | 4.41%  | 10.59% | 33.55% | 7.38%  | 36.42% | 81.13% |
| <b>Run 2</b>      | 4.49   | 2.59   | 2.11   | 1.14   | 0.81   | 0.44   | 0.29   | 0.26   | 0.07   |
| <b>041211</b>     | 4.82   | 2.69   | 1.16   | 1.06   | 0.40   | 0.34   | 0.22   | 0.23   | 0.07   |
|                   | 4.95   | 2.69   | 2.15   | 1.29   | 0.28   | 0.60   | 0.24   | 0.21   | 0.08   |
|                   | 4.51   | 3.15   | 1.60   | 1.31   | 0.35   | 0.73   | 0.22   | 0.20   | 0.11   |
|                   |        |        |        |        | 0.69   | 0.35   | 0.35   | 0.24   | 0.10   |
| <b>AV.</b>        | 4.69   | 2.78   | 1.75   | 1.20   | 0.51   | 0.49   | 0.26   | 0.23   | 0.08   |
| <b>S.D.</b>       | 0.23   | 0.25   | 0.47   | 0.12   | 0.23   | 0.17   | 0.06   | 0.02   | 0.02   |
| <b>intra C.V.</b> | 4.91%  | 9.11%  | 26.65% | 10.11% | 45.08% | 34.65% | 22.71% | 10.93% | 21.84% |
| <b>Run 3</b>      | 7.94   | 3.86   | 2.64   | 1.43   | 1.25   | 0.77   | 0.64   | 0.36   | 0.16   |
| <b>041215</b>     | 8.02   | 4.32   | 2.80   | 1.60   | 1.12   | 0.77   | 0.64   | 0.38   | 0.18   |
|                   | 9.76   | 4.50   | 1.82   | 1.21   | 0.87   | 0.63   | 0.58   | 0.39   | 0.17   |
|                   | 7.51   | 4.34   | 1.35   | 1.29   | 1.22   | 0.87   | 0.64   | 0.42   | 0.16   |
| <b>AV.</b>        | 8.31   | 4.25   | 2.15   | 1.38   | 1.12   | 0.76   | 0.62   | 0.39   | 0.17   |
| <b>S.D.</b>       | 0.99   | 0.27   | 0.69   | 0.17   | 0.17   | 0.10   | 0.03   | 0.03   | 0.01   |
| <b>intra C.V.</b> | 11.95% | 6.45%  | 31.87% | 12.22% | 15.59% | 13.09% | 4.89%  | 6.57%  | 5.98%  |
| <b>inter Av.</b>  | 6.06   | 3.45   | 1.97   | 1.27   | 0.82   | 0.58   | 0.42   | 0.30   | 0.12   |
| <b>inter S.D.</b> | 1.88   | 0.74   | 0.52   | 0.15   | 0.34   | 0.20   | 0.17   | 0.09   | 0.05   |
| <b>inter C.V.</b> | 30.98% | 21.53% | 26.26% | 11.55% | 41.63% | 34.48% | 41.05% | 30.18% | 44.52% |

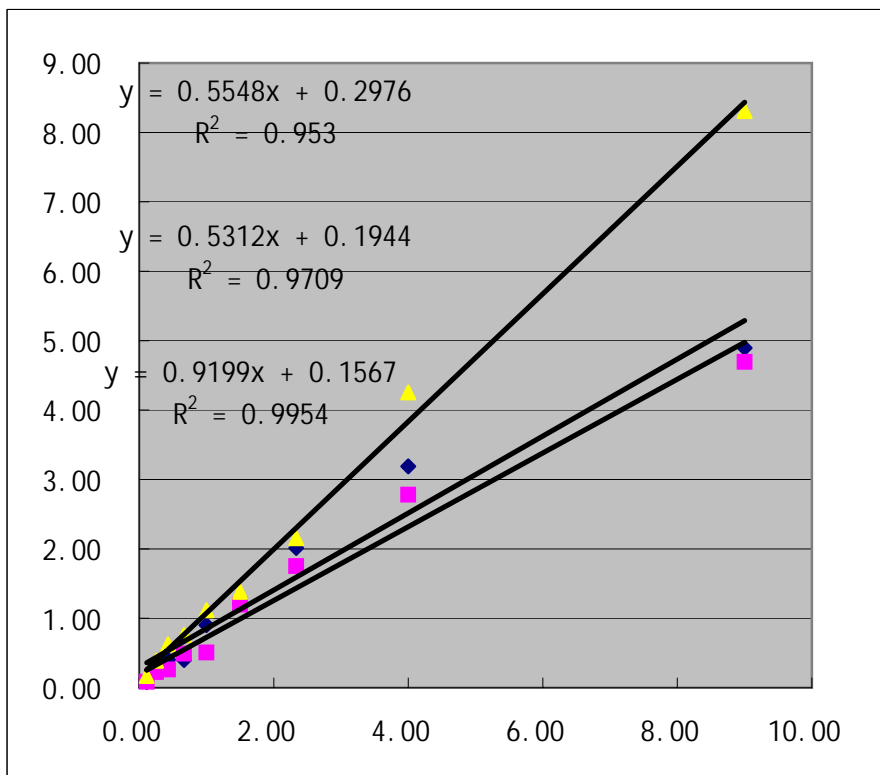

Supplement: 1471-2164-7-143-S11.pdf [file 1471-2164-7-143-S11.pdf]
