# Supplementary material for: Quantify single nucleotide polymorphism (SNP) ratio in pooled DNA based on normalized fluorescence real-time PCR
Source: PubMed Central journal article supplement (PMC1552069; doi:10.1186/1471-2164-7-143), 2006-06-09

|                    |        |        |        |        |        |        |        |        |         |
|--------------------|--------|--------|--------|--------|--------|--------|--------|--------|---------|
| <b>YMDD</b>        | 9.00   | 8.00   | 7.00   | 6.00   | 5.00   | 4.00   | 3.00   | 2.00   | 1.00    |
| <b>YIDD</b>        | 1.00   | 2.00   | 3.00   | 4.00   | 5.00   | 6.00   | 7.00   | 8.00   | 9.00    |
| <b>ratio</b>       | 9.00   | 4.00   | 2.33   | 1.50   | 1.00   | 0.67   | 0.43   | 0.25   | 0.11    |
| <b>Run 1 value</b> | 2.46   | 2.64   | 1.70   | 1.34   | 1.01   | 0.37   | 0.59   | 0.36   | 0.00    |
| <b>O41210</b>      | 3.03   | 1.80   | 1.78   | 1.27   | 0.64   | 0.79   | 0.51   | 0.37   | 0.14    |
|                    | 2.36   |        | 1.41   | 1.26   | 0.91   | 0.81   | 0.53   | 0.28   | 0.29    |
| <b>AV.</b>         | 2.62   | 2.22   | 1.63   | 1.29   | 0.85   | 0.66   | 0.54   | 0.34   | 0.15    |
| <b>S.D.</b>        | 0.36   | 0.59   | 0.19   | 0.05   | 0.19   | 0.25   | 0.04   | 0.05   | 0.14    |
| <b>intra C.V.</b>  | 13.81% | 26.72% | 11.90% | 3.52%  | 22.12% | 38.09% | 7.61%  | 13.72% | 98.39%  |
| <b>Run 2 value</b> | 2.28   | 1.67   | 1.63   | 1.24   | 0.79   | 0.79   | 0.52   | 0.34   | 0.09    |
| <b>O41211</b>      | 2.45   | 1.31   | 1.41   | 1.16   | 0.42   | 0.73   | 0.40   | 0.34   | 0.10    |
|                    | 3.21   | 2.08   | 1.70   | 1.23   | 1.14   | 0.64   | 0.46   | 0.39   | 0.13    |
|                    | 1.13   | 2.04   | 1.39   | 1.38   | 0.87   | 0.77   | 0.53   | 0.40   | 0.13    |
|                    |        |        |        |        | 0.89   | 0.57   | 0.49   | 0.46   | 0.15    |
| <b>AV.</b>         | 2.26   | 1.77   | 1.53   | 1.25   | 0.82   | 0.70   | 0.48   | 0.39   | 0.12    |
| <b>S.D.</b>        | 0.86   | 0.36   | 0.15   | 0.09   | 0.26   | 0.09   | 0.05   | 0.05   | 0.03    |
| <b>intra C.V.</b>  | 37.98% | 20.39% | 10.05% | 7.41%  | 31.72% | 13.30% | 11.17% | 13.23% | 21.62%  |
| <b>Run 3 value</b> | 10.34  | 2.87   | 1.41   | 1.11   | 0.55   | 0.52   | 0.42   | 0.25   | 0.03    |
| <b>O41215</b>      | 5.82   | 2.68   | 1.58   | 1.04   | 0.65   | 0.45   | 0.31   | 0.31   | 0.02    |
|                    | 6.77   | 2.69   | 1.28   | 1.42   | 0.70   | 0.54   | 0.32   | 0.50   | 0.00    |
|                    | 2.93   | 2.69   | 1.55   | 0.78   | 0.69   | 0.55   | 0.23   | 0.65   | 0.00    |
| <b>AV.</b>         | 6.46   | 2.73   | 1.46   | 1.09   | 0.65   | 0.51   | 0.32   | 0.43   | 0.01    |
| <b>S.D.</b>        | 3.06   | 0.09   | 0.14   | 0.27   | 0.07   | 0.04   | 0.08   | 0.18   | 0.02    |
| <b>intra C.V.</b>  | 47.29% | 3.30%  | 9.32%  | 24.43% | 10.38% | 8.56%  | 25.12% | 42.29% | 113.30% |
| <b>inter Av.</b>   | 3.89   | 2.25   | 1.53   | 1.20   | 0.76   | 0.63   | 0.44   | 0.38   | 0.09    |
| <b>inter S.D.</b>  | 2.69   | 0.54   | 0.16   | 0.18   | 0.21   | 0.16   | 0.11   | 0.11   | 0.09    |
| <b>inter C.V.</b>  | 69.23% | 23.96% | 10.36% | 15.06% | 27.37% | 24.53% | 26.06% | 28.82% | 103.45% |

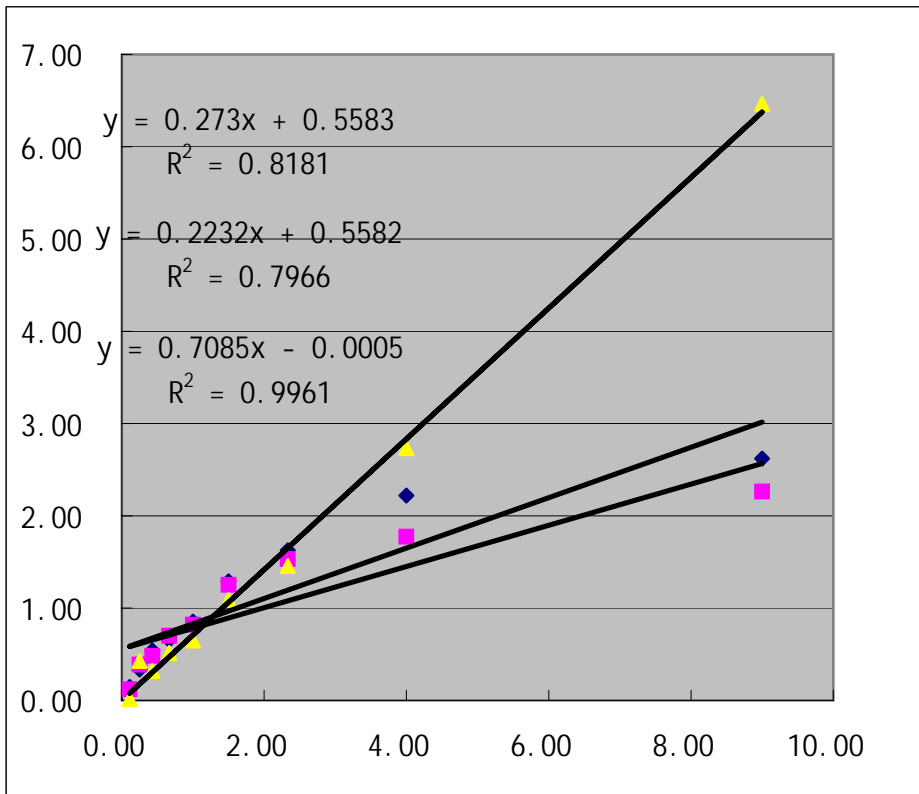

Supplement: 1471-2164-7-143-S12.pdf [file 1471-2164-7-143-S12.pdf]
