# Supplementary material for: Quantify single nucleotide polymorphism (SNP) ratio in pooled DNA based on normalized fluorescence real-time PCR
Source: PubMed Central journal article supplement (PMC1552069; doi:10.1186/1471-2164-7-143), 2006-06-09
Supplement: 1471-2164-7-143-S1.pdf [file 1471-2164-7-143-S1.pdf]

| Well /<br>Cycle | Raw FAM fluorescence data |            |            | Well /<br>Cycle | B5      | B6    | B7    |
|-----------------|---------------------------|------------|------------|-----------------|---------|-------|-------|
|                 | B5                        | B6         | B7         |                 |         |       |       |
| 0.56            | 175.35                    | 180.60     | 173.85     | 0.56            | -0.0663 | -0.03 | -0.06 |
| 1.56            | 186.13                    | 186.22     | 180.08     | 1.56            | -0.0089 | 0.00  | -0.03 |
| 2.56            | 187.56                    | 190.18     | 185.71     | 2.56            | -0.0013 | 0.02  | 0.00  |
| 3.56            | 184.88                    | 186.85     | 181.40     | 3.56            | -0.0155 | 0.00  | -0.02 |
| 4.56            | 191.94                    | 190.14     | 186.08     | 4.56            | 0.0221  | 0.02  | 0.00  |
| 5.56            | 186.34                    | 187.58     | 185.36     | 5.56            | -0.0078 | 0.01  | 0.00  |
| 6.56            | 188.66                    | 191.61     | 187.29     | 6.56            | 0.0046  | 0.03  | 0.01  |
| 7.56            | 187.28                    | 186.22     | 186.24     | 7.56            | -0.0028 | 0.00  | 0.00  |
| 8.56            | 192.91                    | 186.47     | 190.18     | 8.56            | 0.0272  | 0.00  | 0.03  |
| 9.56            | 189.91                    | 189.45     | 187.32     | 9.56            | 0.0112  | 0.02  | 0.01  |
| 10.56           | 190.95                    | 191.08     | 189.73     | 10.56           | 0.0168  | 0.02  | 0.02  |
| 11.56           | 189.71                    | 189.16     | 187.50     | 11.56           | 0.0102  | 0.01  | 0.01  |
| 12.56           | 191.17                    | 192.45     | 193.81     | 12.56           | 0.0180  | 0.03  | 0.04  |
| 13.56           | 190.86                    | 188.22     | 190.48     | 13.56           | 0.0163  | 0.01  | 0.03  |
| 14.56           | 191.46                    | 194.32     | 190.30     | 14.56           | 0.0195  | 0.04  | 0.03  |
| 15.56           | 192.13                    | 188.08     | 187.35     | 15.56           | 0.0231  | 0.01  | 0.01  |
| 16.58           | 192.58                    | 191.17     | 189.92     | 16.58           | 0.0255  | 0.03  | 0.02  |
| 17.58           | 192.24                    | 185.61     | 187.46     | 17.58           | 0.0237  | 0.00  | 0.01  |
| 18.58           | 190.43                    | 188.37     | 190.08     | 18.58           | 0.0140  | 0.01  | 0.02  |
| 19.58           | 192.38                    | 189.18     | 190.19     | 19.58           | 0.0244  | 0.01  | 0.03  |
| 20.58           | 190.19                    | 184.75     | 187.74     | 20.58           | 0.0127  | -0.01 | 0.01  |
| 21.58           | 192.96                    | 183.79     | 190.94     | 21.58           | 0.0275  | -0.01 | 0.03  |
| 22.58           | 191.31                    | 184.67     | 191.38     | 22.58           | 0.0187  | -0.01 | 0.03  |
| 23.58           | 192.78                    | 188.14     | 194.26     | 23.58           | 0.0265  | 0.01  | 0.05  |
| 24.58           | 194.63                    | 188.54     | 194.48     | 24.58           | 0.0364  | 0.01  | 0.05  |
| 25.58           | 198.16                    | 194.05     | 201.15     | 25.58           | 0.0552  | 0.04  | 0.08  |
| 26.58           | 206.89                    | 200.06     | 210.05     | 26.58           | 0.1017  | 0.07  | 0.13  |
| 27.58           | 225.50                    | 216.55     | 226.63     | 27.58           | 0.2008  | 0.16  | 0.22  |
| 28.56           | 240.02                    | 233.56     | 244.14     | 28.56           | 0.2781  | 0.25  | 0.32  |
| 29.61           | 272.06                    | 271.06     | 280.02     | 29.61           | 0.4487  | 0.45  | 0.51  |
| 30.56           | 295.19                    | 299.67     | 304.69     | 30.56           | 0.5719  | 0.61  | 0.64  |
| 31.63           | 327.37                    | 332.06     | 325.81     | 31.63           | 0.7432  | 0.78  | 0.76  |
| 32.63           | 359.68                    | 367.07     | 362.49     | 32.63           | 0.9153  | 0.97  | 0.95  |
| 33.63           | 384.63                    | 398.38     | 382.73     | 33.63           | 1.0481  | 1.14  | 1.06  |
| 34.63           | 404.42                    | 420.96     | 404.12     | 34.63           | 1.1535  | 1.26  | 1.18  |
| 35.63           | 431.85                    | 455.22     | 431.12     | 35.63           | 1.2996  | 1.44  | 1.32  |
| 36.63           | 451.32                    | 473.21     | 451.02     | 36.63           | 1.4032  | 1.54  | 1.43  |
| 37.65           | 469.37                    | 488.35     | 467.86     | 37.65           | 1.4993  | 1.62  | 1.52  |
| 38.65           | 493.16                    | 509.69     | 489.31     | 38.65           | 1.6260  | 1.73  | 1.64  |
| 39.65           | 498.01                    | 521.14     | 496.33     | 39.65           | 1.6518  | 1.80  | 1.68  |
| Parameter       |                           |            |            |                 |         |       |       |
| a               | 323.048500                | 338.957900 | 325.604200 |                 |         |       |       |
| b               | 2.526600                  | 2.281900   | 2.665600   |                 |         |       |       |
| x0              | 32.518000                 | 32.439300  | 32.404000  |                 |         |       |       |
| y0              | 187.797500                | 186.422300 | 185.512400 |                 |         |       |       |
| R               | 0.998757                  | 0.998715   | 0.998665   |                 |         |       |       |

CP<sub>(SDM)</sub>      29.19              29.43              28.89

| Well /<br>Cycle           | Raw VIC fluorescence data |        |        | Well /<br>Cycle | Fluorescence Data Normalized To Y0 |       |       |
|---------------------------|---------------------------|--------|--------|-----------------|------------------------------------|-------|-------|
|                           | B5                        | B6     | B7     |                 | B5                                 | B6    | B7    |
| 0.56                      | 92.95                     | 97.65  | 97.6   | 0.56            | -0.06                              | -0.02 | -0.05 |
| 1.56                      | 97.24                     | 101.12 | 101.99 | 1.56            | -0.01                              | 0.02  | -0.01 |
| 2.56                      | 97.71                     | 103.17 | 101.79 | 2.56            | -0.01                              | 0.04  | -0.01 |
| 3.56                      | 98.71                     | 101.57 | 101.62 | 3.56            | 0.00                               | 0.02  | -0.01 |
| 4.56                      | 97.55                     | 101.38 | 102.18 | 4.56            | -0.01                              | 0.02  | -0.01 |
| 5.56                      | 98.49                     | 102.53 | 103.39 | 5.56            | 0.00                               | 0.03  | 0.01  |
| 6.56                      | 98.8                      | 100.15 | 102.05 | 6.56            | 0.00                               | 0.01  | -0.01 |
| 7.56                      | 99.6                      | 99.82  | 103.59 | 7.56            | 0.01                               | 0.00  | 0.01  |
| 8.56                      | 98.61                     | 99.66  | 104.1  | 8.56            | 0.00                               | 0.00  | 0.01  |
| 9.56                      | 99.42                     | 99.93  | 103.62 | 9.56            | 0.01                               | 0.01  | 0.01  |
| 10.56                     | 100.68                    | 100.81 | 104.25 | 10.56           | 0.02                               | 0.01  | 0.01  |
| 11.56                     | 99.49                     | 99.17  | 103.68 | 11.56           | 0.01                               | 0.00  | 0.01  |
| 12.56                     | 99.89                     | 100.26 | 104.5  | 12.56           | 0.01                               | 0.01  | 0.02  |
| 13.56                     | 99.73                     | 100.76 | 104.06 | 13.56           | 0.01                               | 0.01  | 0.01  |
| 14.56                     | 99.5                      | 98.82  | 105.05 | 14.56           | 0.01                               | -0.01 | 0.02  |
| 15.56                     | 99.2                      | 99.06  | 104.49 | 15.56           | 0.01                               | 0.00  | 0.02  |
| 16.58                     | 99.33                     | 98.58  | 103.5  | 16.58           | 0.01                               | -0.01 | 0.01  |
| 17.58                     | 99.96                     | 99.13  | 104.89 | 17.58           | 0.01                               | 0.00  | 0.02  |
| 18.58                     | 101.17                    | 99.84  | 103.82 | 18.58           | 0.03                               | 0.00  | 0.01  |
| 19.58                     | 99.64                     | 99.2   | 104.21 | 19.58           | 0.01                               | 0.00  | 0.01  |
| 20.58                     | 100.03                    | 97.65  | 105.53 | 20.58           | 0.02                               | -0.02 | 0.03  |
| 21.58                     | 100.4                     | 97.26  | 105.96 | 21.58           | 0.02                               | -0.02 | 0.03  |
| 22.58                     | 101.21                    | 100.39 | 106.41 | 22.58           | 0.03                               | 0.01  | 0.04  |
| 23.58                     | 101.19                    | 98.24  | 106.67 | 23.58           | 0.03                               | -0.01 | 0.04  |
| 24.58                     | 103.7                     | 99.71  | 109.34 | 24.58           | 0.05                               | 0.00  | 0.06  |
| 25.58                     | 103.5                     | 100.68 | 111.74 | 25.58           | 0.05                               | 0.01  | 0.09  |
| 26.58                     | 105.61                    | 103.68 | 114.93 | 26.58           | 0.07                               | 0.04  | 0.12  |
| 27.58                     | 106.8                     | 105.84 | 115.82 | 27.58           | 0.08                               | 0.06  | 0.13  |
| 28.56                     | 111.1                     | 110.75 | 118.24 | 28.56           | 0.13                               | 0.11  | 0.15  |
| 29.61                     | 114.98                    | 114.16 | 123.38 | 29.61           | 0.17                               | 0.15  | 0.20  |
| 30.56                     | 120.16                    | 122.61 | 129.99 | 30.56           | 0.22                               | 0.23  | 0.27  |
| 31.63                     | 126.22                    | 127.79 | 135.88 | 31.63           | 0.28                               | 0.29  | 0.32  |
| 32.63                     | 131.25                    | 136.1  | 142.91 | 32.63           | 0.33                               | 0.37  | 0.39  |
| 33.63                     | 139.87                    | 147.99 | 151.32 | 33.63           | 0.42                               | 0.49  | 0.47  |
| 34.63                     | 146.33                    | 156.39 | 157.15 | 34.63           | 0.49                               | 0.57  | 0.53  |
| 35.63                     | 150.24                    | 166.56 | 162.4  | 35.63           | 0.52                               | 0.68  | 0.58  |
| 36.63                     | 159.25                    | 170.52 | 173.37 | 36.63           | 0.62                               | 0.72  | 0.69  |
| 37.65                     | 161.62                    | 180.73 | 175.1  | 37.65           | 0.64                               | 0.82  | 0.70  |
| 38.65                     | 171.22                    | 189.99 | 186.44 | 38.65           | 0.74                               | 0.91  | 0.81  |
| 39.65                     | 178.67                    | 200.37 | 192.47 | 39.65           | 0.81                               | 1.02  | 0.87  |
| <b>Parameter</b>          |                           |        |        |                 |                                    |       |       |
| <b>a</b>                  | 98.34                     | 112.28 | 115.39 |                 |                                    |       |       |
| <b>b</b>                  | 3.454                     | 2.7339 | 3.7881 |                 |                                    |       |       |
| <b>x0</b>                 | 35.039                    | 34.636 | 35.123 |                 |                                    |       |       |
| <b>y0</b>                 | 98.537                    | 99.389 | 102.75 |                 |                                    |       |       |
| <b>R</b>                  | 0.9979                    | 0.9977 | 0.9985 |                 |                                    |       |       |
| <b>CP<sub>(SDM)</sub></b> | 30.49                     | 31.04  | 30.13  |                 |                                    |       |       |

| B5           |                             |                             | B6           |                             |
|--------------|-----------------------------|-----------------------------|--------------|-----------------------------|
| Well / Cycle | FAM Normalized Fluorescence | VIC Normalized Fluorescence | Well / Cycle | FAM Normalized Fluorescence |
| 0. 56        | -0. 0662815                 | -0. 056695685               | 0. 56        | -0. 031231779               |
| 1. 56        | -0. 008879245               | -0. 013158562               | 1. 56        | -0. 001085171               |
| 2. 56        | -0. 00126466                | -0. 008388761               | 2. 56        | 0. 020156923                |
| 3. 56        | -0. 015535351               | 0. 001759752                | 3. 56        | 0. 002294253                |
| 4. 56        | 0. 022058334                | -0. 010012523               | 4. 56        | 0. 019942357                |
| 5. 56        | -0. 007761019               | -0. 000472921               | 5. 56        | 0. 006210094                |
| 6. 56        | 0. 004592713                | 0. 002673118                | 6. 56        | 0. 027827679                |
| 7. 56        | -0. 002755628               | 0. 010791929                | 7. 56        | -0. 001085171               |
| 8. 56        | 0. 027223472                | 0. 000744901                | 8. 56        | 0. 000255871                |
| 9. 56        | 0. 011248819                | 0. 008965197                | 9. 56        | 0. 016241083                |
| 10. 56       | 0. 016786698                | 0. 021752324                | 10. 56       | 0. 024984672                |
| 11. 56       | 0. 010183842                | 0. 009675593                | 11. 56       | 0. 014685475                |
| 12. 56       | 0. 017958173                | 0. 013734998                | 12. 56       | 0. 032333578                |
| 13. 56       | 0. 016307459                | 0. 012111236                | 13. 56       | 0. 00964316                 |
| 14. 56       | 0. 01950239                 | 0. 009777078                | 14. 56       | 0. 042364567                |
| 15. 56       | 0. 023070062                | 0. 006732524                | 15. 56       | 0. 008892177                |
| 16. 58       | 0. 02546626                 | 0. 00805183                 | 16. 58       | 0. 025467447                |
| 17. 58       | 0. 023655799                | 0. 014445394                | 17. 58       | -0. 004357311               |
| 18. 58       | 0. 014017758                | 0. 026725095                | 18. 58       | 0. 010447784                |
| 19. 58       | 0. 024401283                | 0. 01119787                 | 19. 58       | 0. 014792758                |
| 20. 58       | 0. 012739786                | 0. 01515579                 | 20. 58       | -0. 008970493               |
| 21. 58       | 0. 027489716                | 0. 01891074                 | 21. 58       | -0. 014120092               |
| 22. 58       | 0. 018703657                | 0. 027131036                | 22. 58       | -0. 009399627               |
| 23. 58       | 0. 026531237                | 0. 026928065                | 23. 58       | 0. 009214026                |
| 24. 58       | 0. 036382273                | 0. 052400834                | 24. 58       | 0. 011359692                |
| 25. 58       | 0. 055179116                | 0. 050371131                | 25. 58       | 0. 040916242                |
| 26. 58       | 0. 101665358                | 0. 071784494                | 26. 58       | 0. 073154875                |
| 27. 58       | 0. 200761458                | 0. 083861225                | 27. 58       | 0. 161609958                |
| 28. 56       | 0. 278078782                | 0. 127499833                | 28. 56       | 0. 252854406                |
| 29. 61       | 0. 448688082                | 0. 166876064                | 29. 61       | 0. 454010599                |
| 30. 56       | 0. 57185266                 | 0. 219445363                | 30. 56       | 0. 607479363                |
| 31. 63       | 0. 743207444                | 0. 280945354                | 31. 63       | 0. 781224671                |
| 32. 63       | 0. 915254463                | 0. 331992376                | 32. 63       | 0. 969024092                |
| 33. 63       | 1. 048110332                | 0. 419472561                | 33. 63       | 1. 136976102                |
| 34. 63       | 1. 153489796                | 0. 485031958                | 34. 63       | 1. 258098951                |
| 35. 63       | 1. 299551378                | 0. 524712645                | 35. 63       | 1. 441875248                |
| 36. 63       | 1. 40322688                 | 0. 61615075                 | 36. 63       | 1. 538376578                |
| 37. 65       | 1. 499341046                | 0. 640202727                | 37. 65       | 1. 619590038                |
| 38. 65       | 1. 626020048                | 0. 737628455                | 38. 65       | 1. 734061322                |
| 39. 65       | 1. 651845738                | 0. 813234879                | 39. 65       | 1. 795481013                |

| Experiment derived linear regression |           |
|--------------------------------------|-----------|
| parameter                            | value     |
| y0                                   | -0. 0824  |
| a                                    | 2. 9914   |
| R                                    | 0.9965093 |

| Experiment derived linear regression |            |
|--------------------------------------|------------|
| parameter                            | value      |
| y0                                   | -0. 0227   |
| a                                    | 2. 7451    |
| R                                    | 0.99416363 |

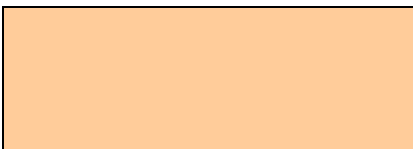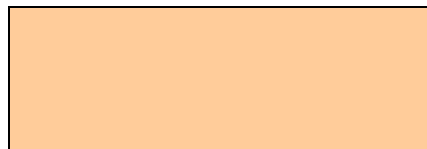

| <b>B7</b>                      |                |                                |                                |  |
|--------------------------------|----------------|--------------------------------|--------------------------------|--|
| VIC Normalized<br>Fluorescence | Well/<br>Cycle | FAM Normalized<br>Fluorescence | VIC Normalized<br>Fluorescence |  |
| -0.017498883                   | 0.56           | -0.062865879                   | -0.050080977                   |  |
| 0.017414367                    | 1.56           | -0.029283218                   | -0.007354086                   |  |
| 0.03804035                     | 2.56           | 0.001065158                    | -0.009300642                   |  |
| 0.021942022                    | 3.56           | -0.02216779                    | -0.010955214                   |  |
| 0.020030345                    | 4.56           | 0.003059634                    | -0.005504859                   |  |
| 0.031601019                    | 5.56           | -0.000821508                   | 0.006271801                    |  |
| 0.007654755                    | 6.56           | 0.009582109                    | -0.00677012                    |  |
| 0.004334475                    | 7.56           | 0.00392211                     | 0.008218357                    |  |
| 0.002724642                    | 8.56           | 0.025160582                    | 0.013182073                    |  |
| 0.005441235                    | 9.56           | 0.009743823                    | 0.00851034                     |  |
| 0.014295316                    | 10.56          | 0.022734868                    | 0.01464199                     |  |
| -0.002205471                   | 11.56          | 0.010714109                    | 0.009094307                    |  |
| 0.008761515                    | 12.56          | 0.044728007                    | 0.017075184                    |  |
| 0.013792243                    | 13.56          | 0.026777725                    | 0.012792762                    |  |
| -0.00572698                    | 14.56          | 0.025807439                    | 0.022428211                    |  |
| -0.003312231                   | 15.56          | 0.009905537                    | 0.016977856                    |  |
| -0.00814173                    | 16.58          | 0.023759059                    | 0.007342407                    |  |
| -0.002607929                   | 17.58          | 0.01049849                     | 0.020870967                    |  |
| 0.004535704                    | 18.58          | 0.024621535                    | 0.010456895                    |  |
| -0.001903627                   | 19.58          | 0.025214487                    | 0.014252678                    |  |
| -0.017498883                   | 20.58          | 0.012007823                    | 0.027099944                    |  |
| -0.021422851                   | 21.58          | 0.029257343                    | 0.031285038                    |  |
| 0.010069505                    | 22.58          | 0.031629153                    | 0.035664788                    |  |
| -0.011562625                   | 23.58          | 0.047153721                    | 0.03819531                     |  |
| 0.003227715                    | 24.58          | 0.048339626                    | 0.064181824                    |  |
| 0.012987327                    | 25.58          | 0.084294096                    | 0.087540488                    |  |
| 0.043171693                    | 26.58          | 0.132269325                    | 0.118588047                    |  |
| 0.064904436                    | 27.58          | 0.221643405                    | 0.127250218                    |  |
| 0.114306182                    | 28.56          | 0.316030627                    | 0.150803538                    |  |
| 0.148615745                    | 29.61          | 0.509440878                    | 0.200830011                    |  |
| 0.233635043                    | 30.56          | 0.642423903                    | 0.265163666                    |  |
| 0.285753382                    | 31.63          | 0.75627074                     | 0.322489722                    |  |
| 0.369364076                    | 32.63          | 0.953993372                    | 0.390911144                    |  |
| 0.48899478                     | 33.63          | 1.063096591                    | 0.472763797                    |  |
| 0.573511005                    | 34.63          | 1.178398856                    | 0.529505886                    |  |
| 0.675836006                    | 35.63          | 1.323941688                    | 0.580602965                    |  |
| 0.71567937                     | 36.63          | 1.431212145                    | 0.687371527                    |  |
| 0.818406829                    | 37.65          | 1.521987749                    | 0.704209231                    |  |
| 0.911575906                    | 38.65          | 1.637613443                    | 0.814578921                    |  |
| 1.016013812                    | 39.65          | 1.675454579                    | 0.873267566                    |  |

| Experiment derived linear regression |            |
|--------------------------------------|------------|
| parameter                            | value      |
| y0                                   | -0.1329    |
| a                                    | 2.8316     |
| R                                    | 0.98832278 |

|    | value        |
|----|--------------|
| y0 | -0.079333333 |
| a  | 2.856033333  |
| R  |              |

| Well /<br>Cycle  | Raw fluorescence data |            | Well /<br>Cycle | B8      | B9      |
|------------------|-----------------------|------------|-----------------|---------|---------|
|                  | B8                    | B9         |                 |         |         |
| 0.56             | 192.52                | 226.77     | 0.56            | -0.0811 | -0.0283 |
| 1.56             | 201.40                | 236.94     | 1.56            | -0.0387 | 0.0153  |
| 2.56             | 202.97                | 236.37     | 2.56            | -0.0312 | 0.0129  |
| 3.56             | 202.55                | 238.99     | 3.56            | -0.0332 | 0.0241  |
| 4.56             | 206.76                | 241.88     | 4.56            | -0.0131 | 0.0365  |
| 5.56             | 210.21                | 239.59     | 5.56            | 0.0033  | 0.0267  |
| 6.56             | 209.36                | 238.83     | 6.56            | -0.0007 | 0.0234  |
| 7.56             | 208.01                | 238.12     | 7.56            | -0.0072 | 0.0204  |
| 8.56             | 214.45                | 234.18     | 8.56            | 0.0236  | 0.0035  |
| 9.56             | 214.87                | 237.53     | 9.56            | 0.0256  | 0.0178  |
| 10.56            | 214.02                | 234.69     | 10.56           | 0.0215  | 0.0057  |
| 11.56            | 212.60                | 238.05     | 11.56           | 0.0147  | 0.0201  |
| 12.56            | 213.25                | 239.62     | 12.56           | 0.0178  | 0.0268  |
| 13.56            | 213.10                | 232.51     | 13.56           | 0.0171  | -0.0037 |
| 14.56            | 218.23                | 233.14     | 14.56           | 0.0416  | -0.0010 |
| 15.56            | 214.07                | 233.78     | 15.56           | 0.0218  | 0.0018  |
| 16.58            | 217.73                | 231.92     | 16.58           | 0.0392  | -0.0062 |
| 17.58            | 215.12                | 234.39     | 17.58           | 0.0268  | 0.0044  |
| 18.58            | 214.26                | 236.59     | 18.58           | 0.0227  | 0.0138  |
| 19.58            | 219.16                | 232.69     | 19.58           | 0.0461  | -0.0029 |
| 20.58            | 215.24                | 229.64     | 20.58           | 0.0273  | -0.0160 |
| 21.58            | 217.57                | 238.35     | 21.58           | 0.0385  | 0.0214  |
| 22.58            | 217.44                | 231.52     | 22.58           | 0.0378  | -0.0079 |
| 23.58            | 219.93                | 234.26     | 23.58           | 0.0497  | 0.0038  |
| 24.58            | 219.93                | 235.98     | 24.58           | 0.0497  | 0.0112  |
| 25.58            | 231.93                | 240.88     | 25.58           | 0.1070  | 0.0322  |
| 26.58            | 238.78                | 252.50     | 26.58           | 0.1397  | 0.0820  |
| 27.58            | 258.25                | 276.13     | 27.58           | 0.2326  | 0.1833  |
| 28.56            | 275.96                | 289.03     | 28.56           | 0.3172  | 0.2385  |
| 29.61            | 310.76                | 329.50     | 29.61           | 0.4833  | 0.4120  |
| 30.56            | 340.33                | 363.99     | 30.56           | 0.6244  | 0.5597  |
| 31.63            | 373.77                | 391.88     | 31.63           | 0.7840  | 0.6793  |
| 32.63            | 414.14                | 433.32     | 32.63           | 0.9767  | 0.8568  |
| 33.63            | 440.15                | 463.43     | 33.63           | 1.1008  | 0.9859  |
| 34.63            | 464.60                | 487.82     | 34.63           | 1.2175  | 1.0904  |
| 35.63            | 492.46                | 525.44     | 35.63           | 1.3505  | 1.2516  |
| 36.63            | 517.37                | 545.21     | 36.63           | 1.4694  | 1.3363  |
| 37.65            | 535.88                | 564.28     | 37.65           | 1.5578  | 1.4180  |
| 38.65            | 552.88                | 593.83     | 38.65           | 1.6389  | 1.5446  |
| 39.65            | 570.73                | 602.25     | 39.65           | 1.7241  | 1.5807  |
| <b>Parameter</b> |                       |            |                 |         |         |
| <b>a</b>         | 374.289400            | 379.342000 |                 |         |         |
| <b>b</b>         | 2.636600              | 2.430800   |                 |         |         |
| <b>x0</b>        | 32.386600             | 32.543000  |                 |         |         |
| <b>y0</b>        | 209.511300            | 233.364500 |                 |         |         |
| <b>R</b>         | 0.998774              | 0.998419   |                 |         |         |

CP<sub>(SDM)</sub>      28.91      29.34

| Raw fluorescence data |            | Well /<br>Cycle | B8      | B9    |
|-----------------------|------------|-----------------|---------|-------|
| 94.49                 | 97.15      | 0.56            | -0.0742 | 0.00  |
| 98.04                 | 98.65      | 1.56            | -0.0394 | 0.01  |
| 99.36                 | 99.17      | 2.56            | -0.0265 | 0.02  |
| 98.49                 | 100.63     | 3.56            | -0.0350 | 0.03  |
| 101.41                | 99.11      | 4.56            | -0.0064 | 0.02  |
| 101.47                | 97.04      | 5.56            | -0.0058 | -0.01 |
| 101.83                | 97.13      | 6.56            | -0.0023 | 0.00  |
| 102.55                | 100.17     | 7.56            | 0.0048  | 0.03  |
| 99.98                 | 97.43      | 8.56            | -0.0204 | 0.00  |
| 102.47                | 98.47      | 9.56            | 0.0040  | 0.01  |
| 105.60                | 96.12      | 10.56           | 0.0347  | -0.02 |
| 103.56                | 98.44      | 11.56           | 0.0147  | 0.01  |
| 101.04                | 98.74      | 12.56           | -0.0100 | 0.01  |
| 102.55                | 99.53      | 13.56           | 0.0048  | 0.02  |
| 104.04                | 97.26      | 14.56           | 0.0194  | 0.00  |
| 106.71                | 97.93      | 15.56           | 0.0455  | 0.00  |
| 104.87                | 96.99      | 16.58           | 0.0275  | -0.01 |
| 104.69                | 98.08      | 17.58           | 0.0257  | 0.00  |
| 106.40                | 97.76      | 18.58           | 0.0425  | 0.00  |
| 105.53                | 97.12      | 19.58           | 0.0340  | 0.00  |
| 105.34                | 97.26      | 20.58           | 0.0321  | 0.00  |
| 106.11                | 97.37      | 21.58           | 0.0397  | 0.00  |
| 106.62                | 98.08      | 22.58           | 0.0447  | 0.00  |
| 108.08                | 100.68     | 23.58           | 0.0590  | 0.03  |
| 109.50                | 100.51     | 24.58           | 0.0729  | 0.03  |
| 109.49                | 99.27      | 25.58           | 0.0728  | 0.02  |
| 114.31                | 105.19     | 26.58           | 0.1200  | 0.08  |
| 116.38                | 109.71     | 27.58           | 0.1403  | 0.12  |
| 121.90                | 112.55     | 28.56           | 0.1944  | 0.15  |
| 128.70                | 121.43     | 29.61           | 0.2610  | 0.24  |
| 141.73                | 130.28     | 30.56           | 0.3887  | 0.33  |
| 154.37                | 144.65     | 31.63           | 0.5125  | 0.48  |
| 162.03                | 156.08     | 32.63           | 0.5876  | 0.60  |
| 182.94                | 168.04     | 33.63           | 0.7924  | 0.72  |
| 198.60                | 180.90     | 34.63           | 0.9459  | 0.85  |
| 204.65                | 192.52     | 35.63           | 1.0052  | 0.97  |
| 217.39                | 200.53     | 36.63           | 1.1300  | 1.05  |
| 226.12                | 208.22     | 37.65           | 1.2155  | 1.13  |
| 241.28                | 216.67     | 38.65           | 1.3641  | 1.22  |
| 252.76                | 229.71     | 39.65           | 1.4765  | 1.35  |
| 171.446600            | 137.567800 |                 |         |       |
| 3.004700              | 2.556800   |                 |         |       |
| 34.271600             | 33.557400  |                 |         |       |
| 102.062000            | 97.606300  |                 |         |       |
| 0.997992              | 0.998855   |                 |         |       |

30.31

30.19

| B8           |                             |                             | B9           |                             |
|--------------|-----------------------------|-----------------------------|--------------|-----------------------------|
| Well / Cycle | FAM Normalized Fluorescence | VIC Normalized Fluorescence | Well / Cycle | FAM Normalized Fluorescence |
| 0. 56        | -0. 081099683               | -0. 074190198               | 0. 56        | -0. 028258368               |
| 1. 56        | -0. 038715334               | -0. 039407419               | 1. 56        | 0. 015321525                |
| 2. 56        | -0. 031221705               | -0. 026474104               | 2. 56        | 0. 012878994                |
| 3. 56        | -0. 03322637                | -0. 034998334               | 3. 56        | 0. 024106066                |
| 4. 56        | -0. 013131989               | -0. 006388274               | 4. 56        | 0. 036490126                |
| 5. 56        | 0. 003334904                | -0. 005800396               | 5. 56        | 0. 026677151                |
| 6. 56        | -0. 000722157               | -0. 002273128               | 6. 56        | 0. 023420443                |
| 7. 56        | -0. 007165723               | 0. 004781407                | 7. 56        | 0. 020377992                |
| 8. 56        | 0. 023572476                | -0. 020399365               | 8. 56        | 0. 003494533                |
| 9. 56        | 0. 025577141                | 0. 00399757                 | 9. 56        | 0. 017849759                |
| 10. 56       | 0. 02152008                 | 0. 034665204                | 10. 56       | 0. 005679956                |
| 11. 56       | 0. 014742403                | 0. 014677353                | 11. 56       | 0. 020078032                |
| 12. 56       | 0. 017844861                | -0. 010013521               | 12. 56       | 0. 026805705                |
| 13. 56       | 0. 017128909                | 0. 004781407                | 13. 56       | -0. 003661654               |
| 14. 56       | 0. 041614462                | 0. 019380377                | 14. 56       | -0. 000962014               |
| 15. 56       | 0. 021758731                | 0. 045540946                | 15. 56       | 0. 001780476                |
| 16. 58       | 0. 039227956                | 0. 027512688                | 16. 58       | -0. 006189887               |
| 17. 58       | 0. 026770394                | 0. 025749054                | 17. 58       | 0. 004394413                |
| 18. 58       | 0. 022665603                | 0. 042503576                | 18. 58       | 0. 013821725                |
| 19. 58       | 0. 046053363                | 0. 033979346                | 19. 58       | -0. 002890328               |
| 20. 58       | 0. 027343155                | 0. 032117732                | 20. 58       | -0. 015960011               |
| 21. 58       | 0. 038464274                | 0. 039662166                | 21. 58       | 0. 021363575                |
| 22. 58       | 0. 037843782                | 0. 044659129                | 22. 58       | -0. 007903944               |
| 23. 58       | 0. 049728583                | 0. 058964159                | 23. 58       | 0. 003837345                |
| 24. 58       | 0. 049728583                | 0. 072877271                | 24. 58       | 0. 011207789                |
| 25. 58       | 0. 10700473                 | 0. 072779291                | 25. 58       | 0. 032204984                |
| 26. 58       | 0. 139699863                | 0. 120005487                | 26. 58       | 0. 081998333                |
| 27. 58       | 0. 232630412                | 0. 140287276                | 27. 58       | 0. 183256236                |
| 28. 56       | 0. 317160459                | 0. 194372048                | 28. 56       | 0. 238534567                |
| 29. 61       | 0. 483261285                | 0. 260998217                | 29. 61       | 0. 41195426                 |
| 30. 56       | 0. 624399257                | 0. 388665713                | 30. 56       | 0. 559748805                |
| 31. 63       | 0. 784008786                | 0. 512512003                | 31. 63       | 0. 679261413                |
| 32. 63       | 0. 97669529                 | 0. 587564422                | 32. 63       | 0. 856837694                |
| 33. 63       | 1. 100841339                | 0. 792439889                | 33. 63       | 0. 985863317                |
| 34. 63       | 1. 217541488                | 0. 945876036                | 34. 63       | 1. 090377928                |
| 35. 63       | 1. 350517609                | 1. 00515373                 | 35. 63       | 1. 251584967                |
| 36. 63       | 1. 469413344                | 1. 129979816                | 36. 63       | 1. 336302222                |
| 37. 65       | 1. 557761801                | 1. 215516059                | 37. 65       | 1. 418019879                |
| 38. 65       | 1. 638903009                | 1. 364053223                | 38. 65       | 1. 544645822                |
| 39. 65       | 1. 724101278                | 1. 476533872                | 39. 65       | 1. 580726717                |

| Experiment derived linear regression |            |
|--------------------------------------|------------|
| parameter                            | value      |
| y0                                   | -0. 0072   |
| a                                    | 1. 6368    |
| R                                    | 0.99155602 |

| Experiment derived linear regression |            |
|--------------------------------------|------------|
| parameter                            | value      |
| y0                                   | 0. 0165    |
| a                                    | 1. 4373    |
| R                                    | 0.99011384 |

VIC Normalized  
Fluorescence

-0.004674903  
0.010692957  
0.016020482  
0.030978533  
0.015405768  
-0.00580188  
-0.004879808  
0.026265723  
-0.001806236  
0.008848814  
-0.015227501  
0.008541457  
0.011615029  
0.019708769  
-0.003547927  
0.003316384  
-0.006314142  
0.00485317  
0.001574693  
-0.00498226  
-0.003547927  
-0.00242095  
0.00485317  
0.031490795  
0.029749104  
0.017045006  
0.077696829  
0.124005315  
0.153101798  
0.244079532  
0.334749909  
0.481974012  
0.599077109  
0.721610183  
0.853363973  
0.972413666  
1.054478041  
1.133263939  
1.21983622  
1.353434153



| FAM Raw fluorescence data |            |            |            | FAM normalized data |         |       |       |
|---------------------------|------------|------------|------------|---------------------|---------|-------|-------|
| Well / Cycle              | C3         | C4         | C5         | Well / Cycle        | C3      | C4    | C5    |
| 0.56                      | 188.66     | 229.61     | 180.33     | 0.56                | -0.0082 | -0.01 | 0.00  |
| 1.56                      | 194.03     | 240.28     | 184.15     | 1.56                | 0.0201  | 0.04  | 0.02  |
| 2.56                      | 194.61     | 242.62     | 182.68     | 2.56                | 0.0231  | 0.05  | 0.02  |
| 3.56                      | 194.92     | 232.87     | 184.34     | 3.56                | 0.0247  | 0.01  | 0.02  |
| 4.56                      | 194.47     | 239.80     | 185.23     | 4.56                | 0.0224  | 0.04  | 0.03  |
| 5.56                      | 192.55     | 235.07     | 180.96     | 5.56                | 0.0123  | 0.02  | 0.01  |
| 6.56                      | 195.38     | 240.03     | 182.43     | 6.56                | 0.0272  | 0.04  | 0.01  |
| 7.56                      | 191.59     | 233.81     | 181.32     | 7.56                | 0.0072  | 0.01  | 0.01  |
| 8.56                      | 195.21     | 236.83     | 182.33     | 8.56                | 0.0263  | 0.02  | 0.01  |
| 9.56                      | 189.48     | 230.97     | 182.73     | 9.56                | -0.0039 | 0.00  | 0.02  |
| 10.56                     | 194.24     | 234.30     | 182.62     | 10.56               | 0.0212  | 0.01  | 0.02  |
| 11.56                     | 193.40     | 230.60     | 180.34     | 11.56               | 0.0168  | 0.00  | 0.00  |
| 12.56                     | 193.76     | 234.01     | 180.16     | 12.56               | 0.0186  | 0.01  | 0.00  |
| 13.56                     | 190.86     | 229.66     | 180.60     | 13.56               | 0.0034  | -0.01 | 0.00  |
| 14.56                     | 192.29     | 237.00     | 179.83     | 14.56               | 0.0109  | 0.02  | 0.00  |
| 15.56                     | 189.47     | 229.44     | 177.97     | 15.56               | -0.0039 | -0.01 | -0.01 |
| 16.58                     | 190.06     | 232.84     | 182.33     | 16.58               | -0.0008 | 0.01  | 0.01  |
| 17.58                     | 191.52     | 228.29     | 180.10     | 17.58               | 0.0069  | -0.01 | 0.00  |
| 18.58                     | 191.81     | 233.85     | 178.83     | 18.58               | 0.0084  | 0.01  | -0.01 |
| 19.58                     | 190.43     | 233.44     | 182.08     | 19.58               | 0.0011  | 0.01  | 0.01  |
| 20.58                     | 189.18     | 229.71     | 178.59     | 20.58               | -0.0054 | -0.01 | -0.01 |
| 21.58                     | 187.15     | 229.53     | 182.02     | 21.58               | -0.0161 | -0.01 | 0.01  |
| 22.58                     | 186.54     | 225.00     | 178.05     | 22.58               | -0.0193 | -0.03 | -0.01 |
| 23.58                     | 189.86     | 229.16     | 181.16     | 23.58               | -0.0019 | -0.01 | 0.01  |
| 24.58                     | 190.06     | 234.47     | 182.19     | 24.58               | -0.0008 | 0.01  | 0.01  |
| 25.58                     | 196.03     | 236.36     | 188.92     | 25.58               | 0.0306  | 0.02  | 0.05  |
| 26.58                     | 200.89     | 245.59     | 192.98     | 26.58               | 0.0561  | 0.06  | 0.07  |
| 27.58                     | 217.73     | 266.11     | 207.88     | 27.58               | 0.1447  | 0.15  | 0.16  |
| 28.56                     | 229.23     | 283.05     | 219.41     | 28.56               | 0.2051  | 0.22  | 0.22  |
| 29.61                     | 261.89     | 323.35     | 248.24     | 29.61               | 0.3768  | 0.40  | 0.38  |
| 30.56                     | 282.80     | 351.97     | 266.54     | 30.56               | 0.4868  | 0.52  | 0.48  |
| 31.63                     | 314.66     | 390.50     | 295.02     | 31.63               | 0.6543  | 0.69  | 0.64  |
| 32.63                     | 347.40     | 432.37     | 322.47     | 32.63               | 0.8264  | 0.87  | 0.79  |
| 33.63                     | 374.15     | 468.59     | 345.64     | 33.63               | 0.9670  | 1.03  | 0.92  |
| 34.63                     | 394.25     | 498.12     | 362.63     | 34.63               | 1.0727  | 1.15  | 1.02  |
| 35.63                     | 423.61     | 532.15     | 394.75     | 35.63               | 1.2270  | 1.30  | 1.19  |
| 36.63                     | 444.72     | 558.06     | 415.45     | 36.63               | 1.3380  | 1.41  | 1.31  |
| 37.65                     | 461.87     | 575.74     | 425.91     | 37.65               | 1.4282  | 1.49  | 1.37  |
| 38.65                     | 478.71     | 606.85     | 445.78     | 38.65               | 1.5167  | 1.62  | 1.48  |
| 39.65                     | 492.47     | 622.65     | 458.37     | 39.65               | 1.5891  | 1.69  | 1.55  |
| Parameter                 |            |            |            |                     |         |       |       |
| a                         | 308.202100 | 397.860300 | 289.089600 |                     |         |       |       |
| b                         | 2.330400   | 2.336600   | 2.488000   |                     |         |       |       |
| x0                        | 32.735700  | 32.746400  | 32.882900  |                     |         |       |       |
| y0                        | 190.212600 | 231.369400 | 179.871100 |                     |         |       |       |
| R                         | 0.998614   | 0.998401   | 0.998797   |                     |         |       |       |

CP<sub>(SDM)</sub>      29.67      29.67      29.61

| Well /<br>Cycle  | Raw fluorescence data |            |            | Well /<br>Cycle | C3      | C4    | C5    |
|------------------|-----------------------|------------|------------|-----------------|---------|-------|-------|
|                  | C3                    | C4         | C5         |                 |         |       |       |
| 0.56             | 97.80                 | 97.81      | 94.94      | 0.56            | 0.0070  | 0.02  | 0.02  |
| 1.56             | 97.86                 | 98.25      | 95.20      | 1.56            | 0.0077  | 0.02  | 0.03  |
| 2.56             | 98.65                 | 98.02      | 93.04      | 2.56            | 0.0158  | 0.02  | 0.00  |
| 3.56             | 99.56                 | 99.33      | 95.78      | 3.56            | 0.0252  | 0.03  | 0.03  |
| 4.56             | 99.46                 | 97.49      | 93.29      | 4.56            | 0.0241  | 0.01  | 0.01  |
| 5.56             | 100.66                | 98.93      | 95.57      | 5.56            | 0.0365  | 0.03  | 0.03  |
| 6.56             | 98.01                 | 96.96      | 93.70      | 6.56            | 0.0092  | 0.01  | 0.01  |
| 7.56             | 98.11                 | 98.12      | 94.49      | 7.56            | 0.0102  | 0.02  | 0.02  |
| 8.56             | 99.46                 | 96.79      | 93.50      | 8.56            | 0.0241  | 0.00  | 0.01  |
| 9.56             | 98.76                 | 98.24      | 93.28      | 9.56            | 0.0169  | 0.02  | 0.01  |
| 10.56            | 98.38                 | 97.41      | 93.46      | 10.56           | 0.0130  | 0.01  | 0.01  |
| 11.56            | 98.54                 | 98.20      | 93.00      | 11.56           | 0.0147  | 0.02  | 0.00  |
| 12.56            | 98.48                 | 97.11      | 93.98      | 12.56           | 0.0140  | 0.01  | 0.01  |
| 13.56            | 98.12                 | 97.68      | 92.93      | 13.56           | 0.0103  | 0.01  | 0.00  |
| 14.56            | 96.51                 | 96.73      | 93.80      | 14.56           | -0.0062 | 0.00  | 0.01  |
| 15.56            | 97.79                 | 96.83      | 92.85      | 15.56           | 0.0069  | 0.00  | 0.00  |
| 16.58            | 98.59                 | 96.05      | 92.20      | 16.58           | 0.0152  | 0.00  | -0.01 |
| 17.58            | 97.45                 | 96.39      | 92.91      | 17.58           | 0.0034  | 0.00  | 0.00  |
| 18.58            | 96.64                 | 95.52      | 91.89      | 18.58           | -0.0049 | -0.01 | -0.01 |
| 19.58            | 96.50                 | 96.28      | 92.89      | 19.58           | -0.0063 | 0.00  | 0.00  |
| 20.58            | 96.22                 | 95.52      | 93.22      | 20.58           | -0.0092 | -0.01 | 0.01  |
| 21.58            | 97.43                 | 94.83      | 91.93      | 21.58           | 0.0032  | -0.02 | -0.01 |
| 22.58            | 96.97                 | 96.22      | 93.51      | 22.58           | -0.0015 | 0.00  | 0.01  |
| 23.58            | 97.84                 | 96.57      | 94.88      | 23.58           | 0.0075  | 0.00  | 0.02  |
| 24.58            | 97.21                 | 98.57      | 95.00      | 24.58           | 0.0010  | 0.02  | 0.02  |
| 25.58            | 101.60                | 101.76     | 95.80      | 25.58           | 0.0462  | 0.06  | 0.03  |
| 26.58            | 105.03                | 103.70     | 101.89     | 26.58           | 0.0815  | 0.08  | 0.10  |
| 27.58            | 110.58                | 108.72     | 106.41     | 27.58           | 0.1386  | 0.13  | 0.15  |
| 28.56            | 119.65                | 118.35     | 115.00     | 28.56           | 0.2320  | 0.23  | 0.24  |
| 29.61            | 132.31                | 129.57     | 125.40     | 29.61           | 0.3624  | 0.34  | 0.35  |
| 30.56            | 146.60                | 144.83     | 139.91     | 30.56           | 0.5095  | 0.50  | 0.51  |
| 31.63            | 163.09                | 159.19     | 155.15     | 31.63           | 0.6793  | 0.65  | 0.67  |
| 32.63            | 181.18                | 175.01     | 167.44     | 32.63           | 0.8656  | 0.82  | 0.81  |
| 33.63            | 201.85                | 198.01     | 185.93     | 33.63           | 1.0785  | 1.06  | 1.00  |
| 34.63            | 219.89                | 215.19     | 200.07     | 34.63           | 1.2642  | 1.23  | 1.16  |
| 35.63            | 233.01                | 231.57     | 213.24     | 35.63           | 1.3993  | 1.40  | 1.30  |
| 36.63            | 251.24                | 244.09     | 226.05     | 36.63           | 1.5870  | 1.53  | 1.44  |
| 37.65            | 263.14                | 260.25     | 237.57     | 37.65           | 1.7096  | 1.70  | 1.56  |
| 38.65            | 279.57                | 275.89     | 249.47     | 38.65           | 1.8787  | 1.86  | 1.69  |
| 39.65            | 295.21                | 287.77     | 261.87     | 39.65           | 2.0398  | 1.99  | 1.82  |
| <b>Parameter</b> |                       |            |            |                 |         |       |       |
| <b>a</b>         | 210.248100            | 205.600400 | 178.946800 |                 |         |       |       |
| <b>b</b>         | 2.568800              | 2.553100   | 2.610700   |                 |         |       |       |
| <b>x0</b>        | 33.811100             | 33.862000  | 33.539300  |                 |         |       |       |
| <b>y0</b>        | 97.115600             | 96.355100  | 92.735700  |                 |         |       |       |
| <b>R</b>         | 0.998859              | 0.999099   | 0.998971   |                 |         |       |       |

|                           |       |       |       |
|---------------------------|-------|-------|-------|
| <b>CP<sub>(SDM)</sub></b> | 30.43 | 30.50 | 30.10 |
|---------------------------|-------|-------|-------|

| Well /<br>Cycle | FAM Normalized<br>Fluorescence | VIC Normalized<br>Fluorescence | Well /<br>Cycle | FAM Normalized<br>Fluorescence |
|-----------------|--------------------------------|--------------------------------|-----------------|--------------------------------|
| 0. 56           | -0. 008162446                  | 0. 007047271                   | 0. 56           | -0. 00760429                   |
| 1. 56           | 0. 020069123                   | 0. 007665092                   | 1. 56           | 0. 038512439                   |
| 2. 56           | 0. 023118342                   | 0. 015799727                   | 2. 56           | 0. 048626136                   |
| 3. 56           | 0. 024748098                   | 0. 025170004                   | 3. 56           | 0. 006485732                   |
| 4. 56           | 0. 022382324                   | 0. 024140303                   | 4. 56           | 0. 036437835                   |
| 5. 56           | 0. 012288355                   | 0. 036496711                   | 5. 56           | 0. 015994336                   |
| 6. 56           | 0. 027166444                   | 0. 009209643                   | 6. 56           | 0. 037431916                   |
| 7. 56           | 0. 007241371                   | 0. 010239344                   | 7. 56           | 0. 010548499                   |
| 8. 56           | 0. 026272707                   | 0. 024140303                   | 8. 56           | 0. 02360122                    |
| 9. 56           | -0. 00385148                   | 0. 016932398                   | 9. 56           | -0. 001726244                  |
| 10. 56          | 0. 02117315                    | 0. 013019535                   | 10. 56          | 0. 012666325                   |
| 11. 56          | 0. 016757039                   | 0. 014667057                   | 11. 56          | -0. 003325418                  |
| 12. 56          | 0. 018649658                   | 0. 014049236                   | 12. 56          | 0. 011412918                   |
| 13. 56          | 0. 00340356                    | 0. 010342314                   | 13. 56          | -0. 007388185                  |
| 14. 56          | 0. 010921464                   | -0. 006235867                  | 14. 56          | 0. 024335975                   |
| 15. 56          | -0. 003904053                  | 0. 006944301                   | 15. 56          | -0. 008339046                  |
| 16. 58          | -0. 00080226                   | 0. 015181907                   | 16. 58          | 0. 00635607                    |
| 17. 58          | 0. 006873362                   | 0. 003443319                   | 17. 58          | -0. 013309452                  |
| 18. 58          | 0. 008397972                   | -0. 004897256                  | 18. 58          | 0. 010721383                   |
| 19. 58          | 0. 001142932                   | -0. 006338837                  | 19. 58          | 0. 008949325                   |
| 20. 58          | -0. 005428662                  | -0. 009221999                  | 20. 58          | -0. 007172081                  |
| 21. 58          | -0. 016100931                  | 0. 003237379                   | 21. 58          | -0. 007950057                  |
| 22. 58          | -0. 019307869                  | -0. 001499244                  | 22. 58          | -0. 027529137                  |
| 23. 58          | -0. 001853715                  | 0. 007459152                   | 23. 58          | -0. 009549232                  |
| 24. 58          | -0. 00080226                   | 0. 000972037                   | 24. 58          | 0. 013401081                   |
| 25. 58          | 0. 030583673                   | 0. 046175898                   | 25. 58          | 0. 021569836                   |
| 26. 58          | 0. 056134031                   | 0. 081494631                   | 26. 58          | 0. 061462752                   |
| 27. 58          | 0. 144666547                   | 0. 138643019                   | 27. 58          | 0. 150152094                   |
| 28. 56          | 0. 205125213                   | 0. 232036872                   | 28. 56          | 0. 223368345                   |
| 29. 61          | 0. 376827823                   | 0. 362396978                   | 29. 61          | 0. 397548682                   |
| 30. 56          | 0. 486757449                   | 0. 509541207                   | 30. 56          | 0. 521246976                   |
| 31. 63          | 0. 65425424                    | 0. 67933885                    | 31. 63          | 0. 687777208                   |
| 32. 63          | 0. 826377432                   | 0. 865611704                   | 32. 63          | 0. 868743231                   |
| 33. 63          | 0. 967009546                   | 1. 078450836                   | 33. 63          | 1. 025289429                   |
| 34. 63          | 1. 072680779                   | 1. 26420884                    | 34. 63          | 1. 152920827                   |
| 35. 63          | 1. 227034382                   | 1. 39930557                    | 35. 63          | 1. 300001642                   |
| 36. 63          | 1. 338015463                   | 1. 587020005                   | 36. 63          | 1. 411987065                   |
| 37. 65          | 1. 428177734                   | 1. 709554387                   | 37. 65          | 1. 488401664                   |
| 38. 65          | 1. 516710249                   | 1. 87873421                    | 38. 65          | 1. 622861969                   |
| 39. 65          | 1. 589050357                   | 2. 039779397                   | 39. 65          | 1. 691151034                   |

| Experiment derived linear regression |           |
|--------------------------------------|-----------|
| parameter                            | value     |
| y0                                   | -0. 0039  |
| a                                    | 0. 9681   |
| R                                    | 0.9981421 |

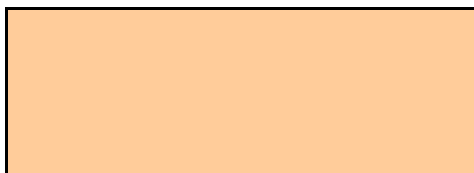

| Experiment derived linear regression |           |
|--------------------------------------|-----------|
| parameter                            | value     |
| y0                                   | -0. 0032  |
| a                                    | 1. 0669   |
| R                                    | 0.9979948 |

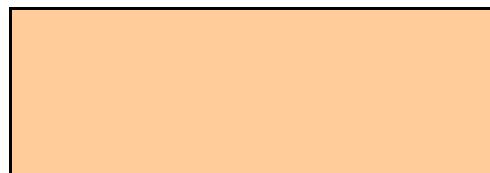

| VIC Normalized Fluorescence | Well / Cycle | FAM Normal ized Fluorescence | VIC Normalized Fluorescence |
|-----------------------------|--------------|------------------------------|-----------------------------|
| 0.015099356                 | 0.56         | 0.002551271                  | 0.023769702                 |
| 0.019665799                 | 1.56         | 0.023788702                  | 0.026573369                 |
| 0.017278795                 | 2.56         | 0.015616183                  | 0.003281368                 |
| 0.030874339                 | 3.56         | 0.024845014                  | 0.032827703                 |
| 0.011778308                 | 4.56         | 0.029793002                  | 0.005977202                 |
| 0.026723028                 | 5.56         | 0.00605378                   | 0.030563203                 |
| 0.00627782                  | 6.56         | 0.014226299                  | 0.010398369                 |
| 0.018316623                 | 7.56         | 0.008055213                  | 0.018917202                 |
| 0.004513513                 | 8.56         | 0.013670345                  | 0.008241702                 |
| 0.019562016                 | 9.56         | 0.01589416                   | 0.005869369                 |
| 0.010948045                 | 10.56        | 0.015282611                  | 0.007810369                 |
| 0.019146885                 | 11.56        | 0.002606867                  | 0.002850035                 |
| 0.007834562                 | 12.56        | 0.00160615                   | 0.013417702                 |
| 0.01375018                  | 13.56        | 0.004052346                  | 0.002095202                 |
| 0.003890816                 | 14.56        | -0.000228497                 | 0.011476702                 |
| 0.004928644                 | 15.56        | -0.010569235                 | 0.001232535                 |
| -0.003166413                | 16.58        | 0.013670345                  | -0.005776632                |
| 0.000362202                 | 17.58        | 0.001272578                  | 0.001879535                 |
| -0.0086669                  | 18.58        | -0.005788034                 | -0.009119465                |
| -0.000779409                | 19.58        | 0.012280461                  | 0.001663868                 |
| -0.0086669                  | 20.58        | -0.007122323                 | 0.005222369                 |
| -0.015827912                | 21.58        | 0.011946889                  | -0.008688132                |
| -0.001402105                | 22.58        | -0.010124472                 | 0.008349535                 |
| 0.002230292                 | 23.58        | 0.007165687                  | 0.023122702                 |
| 0.022986848                 | 24.58        | 0.01289201                   | 0.024416703                 |
| 0.056093554                 | 25.58        | 0.050307693                  | 0.033043369                 |
| 0.076227413                 | 26.58        | 0.072879412                  | 0.098713872                 |
| 0.128326368                 | 27.58        | 0.15571651                   | 0.14745454                  |
| 0.228269183                 | 28.56        | 0.21981797                   | 0.240083377                 |
| 0.344713461                 | 29.61        | 0.380099416                  | 0.352230047                 |
| 0.503085981                 | 30.56        | 0.481838939                  | 0.508696219                 |
| 0.652118051                 | 31.63        | 0.640174547                  | 0.673034225                 |
| 0.816302406                 | 32.63        | 0.792783832                  | 0.805561397                 |
| 1.055002797                 | 33.63        | 0.9215983                    | 1.004945237                 |
| 1.23330161                  | 34.63        | 1.01605483                   | 1.157421576                 |
| 1.403297802                 | 35.63        | 1.194627152                  | 1.29943808                  |
| 1.53323384                  | 36.63        | 1.309709564                  | 1.437572585                 |
| 1.70094681                  | 37.65        | 1.367862319                  | 1.56179659                  |
| 1.863263076                 | 38.65        | 1.478330315                  | 1.690118261                 |
| 1.986557017                 | 39.65        | 1.548324884                  | 1.823831599                 |

| Experiment derived linear regression |            |
|--------------------------------------|------------|
| parameter                            | value      |
| y0                                   | -0.0032    |
| a                                    | 0.9788     |
| R                                    | 0.99673657 |

|    | value        |
|----|--------------|
| y0 | -0.003433333 |
| a  | 1.0046       |
| R  |              |

| Well /<br>Cycle  | Raw fluorescence data |            |            | Well /<br>Cycle | C6      | C7    | C8    |
|------------------|-----------------------|------------|------------|-----------------|---------|-------|-------|
|                  | C6                    | C7         | C8         |                 |         |       |       |
| 0.56             | 195.24                | 178.61     | 176.25     | 0.56            | -0.0243 | 0.00  | -0.05 |
| 1.56             | 202.70                | 177.93     | 183.59     | 1.56            | 0.0130  | -0.01 | -0.01 |
| 2.56             | 203.48                | 180.25     | 185.00     | 2.56            | 0.0169  | 0.01  | 0.00  |
| 3.56             | 202.04                | 180.36     | 186.45     | 3.56            | 0.0097  | 0.01  | 0.00  |
| 4.56             | 204.65                | 181.86     | 188.53     | 4.56            | 0.0227  | 0.02  | 0.02  |
| 5.56             | 200.69                | 179.03     | 184.46     | 5.56            | 0.0029  | 0.00  | -0.01 |
| 6.56             | 206.03                | 180.79     | 188.17     | 6.56            | 0.0296  | 0.01  | 0.01  |
| 7.56             | 199.66                | 180.13     | 185.71     | 7.56            | -0.0022 | 0.01  | 0.00  |
| 8.56             | 202.69                | 181.49     | 188.65     | 8.56            | 0.0129  | 0.01  | 0.02  |
| 9.56             | 198.90                | 179.77     | 186.93     | 9.56            | -0.0060 | 0.00  | 0.01  |
| 10.56            | 201.52                | 180.11     | 186.83     | 10.56           | 0.0071  | 0.01  | 0.01  |
| 11.56            | 200.89                | 180.44     | 188.09     | 11.56           | 0.0039  | 0.01  | 0.01  |
| 12.56            | 201.73                | 181.69     | 187.99     | 12.56           | 0.0081  | 0.02  | 0.01  |
| 13.56            | 200.43                | 180.55     | 190.80     | 13.56           | 0.0016  | 0.01  | 0.03  |
| 14.56            | 207.71                | 183.60     | 191.38     | 14.56           | 0.0380  | 0.03  | 0.03  |
| 15.56            | 202.05                | 177.13     | 191.42     | 15.56           | 0.0097  | -0.01 | 0.03  |
| 16.58            | 202.10                | 179.24     | 184.26     | 16.58           | 0.0100  | 0.00  | -0.01 |
| 17.58            | 199.42                | 179.56     | 187.11     | 17.58           | -0.0034 | 0.00  | 0.01  |
| 18.58            | 202.81                | 182.31     | 188.77     | 18.58           | 0.0135  | 0.02  | 0.02  |
| 19.58            | 202.92                | 179.86     | 187.45     | 19.58           | 0.0141  | 0.01  | 0.01  |
| 20.58            | 202.00                | 178.21     | 190.75     | 20.58           | 0.0095  | 0.00  | 0.03  |
| 21.58            | 201.56                | 180.43     | 190.96     | 21.58           | 0.0073  | 0.01  | 0.03  |
| 22.58            | 197.18                | 178.34     | 183.75     | 22.58           | -0.0146 | 0.00  | -0.01 |
| 23.58            | 204.39                | 183.65     | 191.23     | 23.58           | 0.0214  | 0.03  | 0.03  |
| 24.58            | 203.00                | 181.06     | 192.46     | 24.58           | 0.0145  | 0.01  | 0.04  |
| 25.58            | 204.54                | 185.96     | 198.61     | 25.58           | 0.0222  | 0.04  | 0.07  |
| 26.58            | 209.11                | 190.23     | 201.09     | 26.58           | 0.0450  | 0.06  | 0.08  |
| 27.58            | 223.59                | 199.88     | 215.12     | 27.58           | 0.1174  | 0.12  | 0.16  |
| 28.56            | 239.93                | 214.97     | 229.33     | 28.56           | 0.1990  | 0.20  | 0.23  |
| 29.61            | 264.32                | 241.66     | 254.63     | 29.61           | 0.3209  | 0.35  | 0.37  |
| 30.56            | 286.65                | 253.69     | 271.57     | 30.56           | 0.4325  | 0.42  | 0.46  |
| 31.63            | 316.82                | 279.23     | 294.40     | 31.63           | 0.5833  | 0.56  | 0.59  |
| 32.63            | 343.88                | 305.68     | 325.80     | 32.63           | 0.7185  | 0.71  | 0.75  |
| 33.63            | 366.08                | 329.35     | 348.29     | 33.63           | 0.8295  | 0.84  | 0.88  |
| 34.63            | 387.38                | 344.72     | 363.82     | 34.63           | 0.9359  | 0.93  | 0.96  |
| 35.63            | 412.66                | 370.16     | 390.65     | 35.63           | 1.0622  | 1.07  | 1.10  |
| 36.63            | 432.11                | 388.83     | 405.40     | 36.63           | 1.1594  | 1.17  | 1.18  |
| 37.65            | 451.58                | 402.22     | 422.03     | 37.65           | 1.2567  | 1.25  | 1.27  |
| 38.65            | 473.27                | 417.73     | 443.54     | 38.65           | 1.3651  | 1.34  | 1.39  |
| 39.65            | 483.59                | 428.36     | 455.61     | 39.65           | 1.4167  | 1.39  | 1.45  |
| <b>Parameter</b> |                       |            |            |                 |         |       |       |
| <b>a</b>         | 294.535000            | 259.619100 | 283.897400 |                 |         |       |       |
| <b>b</b>         | 2.474300              | 2.466800   | 2.665300   |                 |         |       |       |
| <b>x0</b>        | 32.993100             | 32.912200  | 32.968100  |                 |         |       |       |
| <b>y0</b>        | 200.102700            | 178.895000 | 185.708400 |                 |         |       |       |
| <b>R</b>         | 0.998399              | 0.998981   | 0.998692   |                 |         |       |       |

CP<sub>(SDM)</sub>      29.73      29.66      29.46

| Well /<br>Cycle  | Raw fluorescence data |            |            | Well /<br>Cycle | C6      | C7    | C8    |
|------------------|-----------------------|------------|------------|-----------------|---------|-------|-------|
|                  | C6                    | C7         | C8         |                 |         |       |       |
| 0.56             | 100.85                | 98.29      | 94.51      | 0.56            | 0.0005  | -0.02 | -0.03 |
| 1.56             | 102.18                | 103.51     | 97.75      | 1.56            | 0.0137  | 0.03  | 0.00  |
| 2.56             | 102.18                | 102.65     | 95.08      | 2.56            | 0.0137  | 0.03  | -0.03 |
| 3.56             | 102.45                | 101.03     | 97.44      | 3.56            | 0.0164  | 0.01  | 0.00  |
| 4.56             | 102.51                | 99.97      | 97.40      | 4.56            | 0.0170  | 0.00  | 0.00  |
| 5.56             | 101.12                | 103.49     | 98.65      | 5.56            | 0.0032  | 0.03  | 0.01  |
| 6.56             | 101.46                | 101.30     | 97.22      | 6.56            | 0.0066  | 0.01  | -0.01 |
| 7.56             | 102.54                | 102.06     | 98.62      | 7.56            | 0.0173  | 0.02  | 0.01  |
| 8.56             | 102.83                | 101.73     | 98.73      | 8.56            | 0.0202  | 0.02  | 0.01  |
| 9.56             | 103.13                | 101.54     | 97.79      | 9.56            | 0.0231  | 0.01  | 0.00  |
| 10.56            | 101.41                | 100.30     | 98.90      | 10.56           | 0.0061  | 0.00  | 0.01  |
| 11.56            | 101.88                | 100.23     | 98.98      | 11.56           | 0.0107  | 0.00  | 0.01  |
| 12.56            | 103.25                | 101.83     | 99.99      | 12.56           | 0.0243  | 0.02  | 0.02  |
| 13.56            | 101.74                | 102.49     | 99.64      | 13.56           | 0.0093  | 0.02  | 0.02  |
| 14.56            | 100.83                | 102.56     | 100.98     | 14.56           | 0.0003  | 0.02  | 0.03  |
| 15.56            | 101.63                | 102.13     | 99.35      | 15.56           | 0.0083  | 0.02  | 0.02  |
| 16.58            | 101.23                | 99.40      | 98.72      | 16.58           | 0.0043  | -0.01 | 0.01  |
| 17.58            | 102.23                | 100.48     | 100.41     | 17.58           | 0.0142  | 0.00  | 0.03  |
| 18.58            | 101.38                | 98.98      | 99.75      | 18.58           | 0.0058  | -0.01 | 0.02  |
| 19.58            | 99.74                 | 100.42     | 99.54      | 19.58           | -0.0105 | 0.00  | 0.02  |
| 20.58            | 100.53                | 99.09      | 101.44     | 20.58           | -0.0027 | -0.01 | 0.04  |
| 21.58            | 101.14                | 101.27     | 102.17     | 21.58           | 0.0034  | 0.01  | 0.04  |
| 22.58            | 102.27                | 101.98     | 102.38     | 22.58           | 0.0146  | 0.02  | 0.05  |
| 23.58            | 101.74                | 101.53     | 102.10     | 23.58           | 0.0093  | 0.01  | 0.04  |
| 24.58            | 102.90                | 103.85     | 104.88     | 24.58           | 0.0209  | 0.04  | 0.07  |
| 25.58            | 108.12                | 106.67     | 106.48     | 25.58           | 0.0726  | 0.07  | 0.09  |
| 26.58            | 112.04                | 110.38     | 113.59     | 26.58           | 0.1115  | 0.10  | 0.16  |
| 27.58            | 116.94                | 118.82     | 121.09     | 27.58           | 0.1601  | 0.19  | 0.24  |
| 28.56            | 131.44                | 133.65     | 134.13     | 28.56           | 0.3040  | 0.34  | 0.37  |
| 29.61            | 146.07                | 144.85     | 146.44     | 29.61           | 0.4491  | 0.45  | 0.50  |
| 30.56            | 165.24                | 165.78     | 167.38     | 30.56           | 0.6393  | 0.66  | 0.71  |
| 31.63            | 186.02                | 185.11     | 189.20     | 31.63           | 0.8455  | 0.85  | 0.93  |
| 32.63            | 207.00                | 202.82     | 208.92     | 32.63           | 1.0536  | 1.03  | 1.14  |
| 33.63            | 236.00                | 228.77     | 234.19     | 33.63           | 1.3413  | 1.29  | 1.39  |
| 34.63            | 256.30                | 246.20     | 254.95     | 34.63           | 1.5427  | 1.46  | 1.61  |
| 35.63            | 276.90                | 267.95     | 271.25     | 35.63           | 1.7471  | 1.68  | 1.77  |
| 36.63            | 296.02                | 284.87     | 290.27     | 36.63           | 1.9368  | 1.85  | 1.97  |
| 37.65            | 309.13                | 294.64     | 302.66     | 37.65           | 2.0668  | 1.94  | 2.09  |
| 38.65            | 326.22                | 313.81     | 315.67     | 38.65           | 2.2364  | 2.14  | 2.23  |
| 39.65            | 339.92                | 329.07     | 338.43     | 39.65           | 2.3723  | 2.29  | 2.46  |
| <b>Parameter</b> |                       |            |            |                 |         |       |       |
| <b>a</b>         | 251.023400            | 240.949100 | 252.469500 |                 |         |       |       |
| <b>b</b>         | 2.452600              | 2.579900   | 2.685300   |                 |         |       |       |
| <b>x0</b>        | 33.390800             | 33.401600  | 33.332200  |                 |         |       |       |
| <b>y0</b>        | 100.797900            | 100.085400 | 97.814400  |                 |         |       |       |
| <b>R</b>         | 0.999417              | 0.999046   | 0.999257   |                 |         |       |       |

|                           |       |       |       |
|---------------------------|-------|-------|-------|
| <b>CP<sub>(SDM)</sub></b> | 30.16 | 30.00 | 29.80 |
|---------------------------|-------|-------|-------|

| C6           |                             |                             | C7           |                             |  |
|--------------|-----------------------------|-----------------------------|--------------|-----------------------------|--|
| Well / Cycle | FAM Normalized Fluorescence | VIC Normalized Fluorescence | Well / Cycle | FAM Normalized Fluorescence |  |
| 0.56         | -0.024301021                | 0.000516876                 | 0.56         | -0.001593113                |  |
| 1.56         | 0.012979835                 | 0.013711595                 | 1.56         | -0.005394226                |  |
| 2.56         | 0.016877833                 | 0.013711595                 | 2.56         | 0.007574275                 |  |
| 3.56         | 0.009681529                 | 0.016390222                 | 3.56         | 0.008189161                 |  |
| 4.56         | 0.022724831                 | 0.016985473                 | 4.56         | 0.016573968                 |  |
| 5.56         | 0.002934993                 | 0.003195503                 | 5.56         | 0.000754633                 |  |
| 6.56         | 0.029621289                 | 0.006568589                 | 6.56         | 0.010592806                 |  |
| 7.56         | -0.002212364                | 0.017283098                 | 7.56         | 0.006903491                 |  |
| 8.56         | 0.012929861                 | 0.020160142                 | 8.56         | 0.014505716                 |  |
| 9.56         | -0.006010414                | 0.023136395                 | 9.56         | 0.004891137                 |  |
| 10.56        | 0.007082863                 | 0.006072547                 | 10.56        | 0.006791693                 |  |
| 11.56        | 0.00393448                  | 0.010735343                 | 11.56        | 0.008636351                 |  |
| 12.56        | 0.008132324                 | 0.024326896                 | 12.56        | 0.01562369                  |  |
| 13.56        | 0.00163566                  | 0.009346425                 | 13.56        | 0.009251237                 |  |
| 14.56        | 0.038016978                 | 0.000318459                 | 14.56        | 0.026300344                 |  |
| 15.56        | 0.009731503                 | 0.008255132                 | 15.56        | -0.009866123                |  |
| 16.58        | 0.009981375                 | 0.004286796                 | 16.58        | 0.001928506                 |  |
| 17.58        | -0.003411748                | 0.014207637                 | 17.58        | 0.003717264                 |  |
| 18.58        | 0.013529553                 | 0.005774922                 | 18.58        | 0.01908941                  |  |
| 19.58        | 0.01407927                  | -0.010495258                | 19.58        | 0.005394226                 |  |
| 20.58        | 0.009481631                 | -0.002657793                | 20.58        | -0.003829062                |  |
| 21.58        | 0.00728276                  | 0.00339392                  | 21.58        | 0.008580452                 |  |
| 22.58        | -0.014606                   | 0.014604471                 | 22.58        | -0.003102378                |  |
| 23.58        | 0.021425498                 | 0.009346425                 | 23.58        | 0.026579837                 |  |
| 24.58        | 0.014479065                 | 0.020854601                 | 24.58        | 0.012102071                 |  |
| 25.58        | 0.022175113                 | 0.072641394                 | 25.58        | 0.03949244                  |  |
| 26.58        | 0.045013386                 | 0.111531093                 | 26.58        | 0.06336119                  |  |
| 27.58        | 0.117376227                 | 0.160143217                 | 27.58        | 0.117303446                 |  |
| 28.56        | 0.199034296                 | 0.303995421                 | 28.56        | 0.201654602                 |  |
| 29.61        | 0.320921707                 | 0.449137333                 | 29.61        | 0.350848263                 |  |
| 30.56        | 0.432514404                 | 0.639319867                 | 30.56        | 0.418094413                 |  |
| 31.63        | 0.583286982                 | 0.845474955                 | 31.63        | 0.560859722                 |  |
| 32.63        | 0.718517541                 | 1.053614212                 | 32.63        | 0.708711814                 |  |
| 33.63        | 0.829460572                 | 1.341318619                 | 33.63        | 0.841024064                 |  |
| 34.63        | 0.935905912                 | 1.542711703                 | 34.63        | 0.926940384                 |  |
| 35.63        | 1.062241039                 | 1.74708104                  | 35.63        | 1.069146706                 |  |
| 36.63        | 1.159441127                 | 1.936767532                 | 36.63        | 1.173509601                 |  |
| 37.65        | 1.256741163                 | 2.066829765                 | 37.65        | 1.248357975                 |  |
| 38.65        | 1.365135503                 | 2.236376948                 | 38.65        | 1.335056877                 |  |
| 39.65        | 1.41670902                  | 2.372292478                 | 39.65        | 1.394477207                 |  |

| Experiment derived linear regression on |            |
|-----------------------------------------|------------|
| parameter                               | value      |
| y0                                      | -0.0101    |
| a                                       | 0.6981     |
| R                                       | 0.99843518 |

| Experiment derived linear regression on |            |
|-----------------------------------------|------------|
| parameter                               | value      |
| y0                                      | -0.0069    |
| a                                       | 0.6848     |
| R                                       | 0.99393004 |



| C8                          |              |                             |                             |
|-----------------------------|--------------|-----------------------------|-----------------------------|
| VIC Normalized Fluorescence | Well / Cycle | FAM Normalized Fluorescence | VIC Normalized Fluorescence |
| -0.01793868                 | 0.56         | -0.05093146                 | -0.033782347                |
| 0.034216779                 | 1.56         | -0.011407131                | -0.00065839                 |
| 0.025624117                 | 2.56         | -0.003814582                | -0.027954984                |
| 0.00943794                  | 3.56         | 0.003993357                 | -0.003827657                |
| -0.001153015                | 4.56         | 0.015193712                 | -0.004236595                |
| 0.03401695                  | 5.56         | -0.006722367                | 0.008542709                 |
| 0.012135636                 | 6.56         | 0.013255189                 | -0.006076815                |
| 0.019729151                 | 7.56         | 8.61566E-06                 | 0.008236006                 |
| 0.016431967                 | 8.56         | 0.015839887                 | 0.009360585                 |
| 0.014533588                 | 9.56         | 0.006578055                 | -0.000249452                |
| 0.002144169                 | 10.56        | 0.006039576                 | 0.01109857                  |
| 0.001444766                 | 11.56        | 0.012824406                 | 0.011916446                 |
| 0.017431114                 | 12.56        | 0.012285928                 | 0.022242124                 |
| 0.024025482                 | 13.56        | 0.027417177                 | 0.018663919                 |
| 0.024724885                 | 14.56        | 0.030540353                 | 0.032363333                 |
| 0.020428554                 | 15.56        | 0.030755744                 | 0.01569912                  |
| -0.006848152                | 16.56        | -0.007799324                | 0.009258351                 |
| 0.003942633                 | 17.56        | 0.007547316                 | 0.02653597                  |
| -0.011044568                | 18.56        | 0.016486061                 | 0.019788497                 |
| 0.003343145                 | 19.56        | 0.009378143                 | 0.017641574                 |
| -0.009945507                | 20.56        | 0.027147937                 | 0.037066117                 |
| 0.011835892                 | 21.56        | 0.028278742                 | 0.044529231                 |
| 0.018929834                 | 22.56        | -0.010545565                | 0.046676154                 |
| 0.014433674                 | 23.56        | 0.029732635                 | 0.04381359                  |
| 0.037613878                 | 24.56        | 0.036355921                 | 0.072234763                 |
| 0.065789815                 | 25.56        | 0.069472356                 | 0.088592273                 |
| 0.102858159                 | 26.56        | 0.082826625                 | 0.161280957                 |
| 0.187186143                 | 27.56        | 0.158375173                 | 0.237956783                 |
| 0.335359603                 | 28.56        | 0.234892983                 | 0.371270488                 |
| 0.447264037                 | 29.56        | 0.37112807                  | 0.497121078                 |
| 0.656385447                 | 30.56        | 0.462346345                 | 0.711199987                 |
| 0.849520509                 | 31.56        | 0.58528101                  | 0.934275526                 |
| 1.026469395                 | 32.56        | 0.754363292                 | 1.135881833                 |
| 1.285747971                 | 33.56        | 0.87546713                  | 1.394228253                 |
| 1.459899246                 | 34.56        | 0.959092857                 | 1.606466941                 |
| 1.67721366                  | 35.56        | 1.103566667                 | 1.773109072                 |
| 1.846269286                 | 36.56        | 1.182992261                 | 1.967558969                 |
| 1.943885921                 | 37.56        | 1.272541253                 | 2.094227435                 |
| 2.135422349                 | 38.56        | 1.388368001                 | 2.227234436                 |
| 2.28789214                  | 39.56        | 1.453362368                 | 2.459920012                 |

| Experiment derived linear regression |            |
|--------------------------------------|------------|
| parameter                            | value      |
| y0                                   | -0.0022    |
| a                                    | 0.6581     |
| R                                    | 0.99496935 |

| average | value       |
|---------|-------------|
| y0      | -0.0064     |
| a       | 0.680333333 |



| Raw fluorescence data |            |            | Well / |         |       |       |
|-----------------------|------------|------------|--------|---------|-------|-------|
| C9                    | D2         | D3         | Cycle  | C9      | D2    | D3    |
| 165.88                | 143.77     | 170.44     | 0.56   | -0.0748 | -0.01 | -0.03 |
| 172.57                | 146.07     | 174.16     | 1.56   | -0.0375 | 0.00  | -0.01 |
| 177.39                | 148.38     | 178.68     | 2.56   | -0.0106 | 0.02  | 0.01  |
| 177.97                | 146.70     | 177.71     | 3.56   | -0.0074 | 0.01  | 0.01  |
| 178.37                | 150.87     | 181.30     | 4.56   | -0.0051 | 0.04  | 0.03  |
| 177.80                | 145.62     | 177.18     | 5.56   | -0.0083 | 0.00  | 0.00  |
| 179.64                | 148.94     | 182.16     | 6.56   | 0.0019  | 0.02  | 0.03  |
| 178.39                | 146.77     | 177.45     | 7.56   | -0.0050 | 0.01  | 0.00  |
| 178.07                | 150.21     | 178.30     | 8.56   | -0.0068 | 0.03  | 0.01  |
| 182.65                | 146.21     | 177.07     | 9.56   | 0.0187  | 0.00  | 0.00  |
| 181.35                | 148.13     | 179.84     | 10.56  | 0.0115  | 0.02  | 0.02  |
| 181.06                | 148.15     | 178.59     | 11.56  | 0.0099  | 0.02  | 0.01  |
| 183.00                | 149.09     | 178.88     | 12.56  | 0.0207  | 0.02  | 0.01  |
| 183.04                | 145.52     | 177.41     | 13.56  | 0.0209  | 0.00  | 0.00  |
| 182.32                | 145.71     | 178.92     | 14.56  | 0.0169  | 0.00  | 0.01  |
| 183.56                | 142.95     | 176.01     | 15.56  | 0.0238  | -0.02 | 0.00  |
| 183.45                | 146.45     | 178.39     | 16.58  | 0.0232  | 0.01  | 0.01  |
| 183.85                | 145.38     | 176.52     | 17.58  | 0.0254  | 0.00  | 0.00  |
| 185.07                | 145.48     | 179.51     | 18.58  | 0.0322  | 0.00  | 0.02  |
| 182.56                | 146.86     | 178.33     | 19.58  | 0.0182  | 0.01  | 0.01  |
| 183.07                | 143.06     | 176.74     | 20.58  | 0.0211  | -0.02 | 0.00  |
| 185.20                | 144.52     | 178.88     | 21.58  | 0.0330  | -0.01 | 0.01  |
| 183.26                | 143.79     | 173.64     | 22.58  | 0.0221  | -0.01 | -0.02 |
| 187.78                | 143.55     | 176.89     | 23.58  | 0.0473  | -0.01 | 0.00  |
| 188.21                | 144.49     | 179.09     | 24.58  | 0.0497  | -0.01 | 0.01  |
| 192.76                | 148.60     | 181.28     | 25.58  | 0.0751  | 0.02  | 0.03  |
| 194.83                | 150.33     | 184.74     | 26.58  | 0.0867  | 0.03  | 0.05  |
| 200.61                | 158.32     | 195.55     | 27.58  | 0.1189  | 0.09  | 0.11  |
| 214.68                | 162.72     | 202.39     | 28.56  | 0.1974  | 0.12  | 0.15  |
| 229.46                | 180.41     | 223.52     | 29.61  | 0.2798  | 0.24  | 0.27  |
| 243.90                | 187.13     | 237.39     | 30.56  | 0.3604  | 0.28  | 0.34  |
| 262.27                | 200.86     | 257.96     | 31.63  | 0.4628  | 0.38  | 0.46  |
| 285.14                | 216.32     | 281.61     | 32.63  | 0.5904  | 0.49  | 0.59  |
| 300.02                | 234.66     | 303.53     | 33.63  | 0.6734  | 0.61  | 0.72  |
| 313.42                | 242.82     | 318.65     | 34.63  | 0.7481  | 0.67  | 0.80  |
| 334.28                | 259.74     | 343.00     | 35.63  | 0.8645  | 0.78  | 0.94  |
| 347.08                | 272.83     | 357.42     | 36.63  | 0.9358  | 0.87  | 1.02  |
| 359.01                | 283.84     | 371.84     | 37.65  | 1.0024  | 0.95  | 1.11  |
| 374.48                | 291.41     | 389.10     | 38.65  | 1.0887  | 1.00  | 1.20  |
| 386.55                | 298.58     | 400.64     | 39.65  | 1.1560  | 1.05  | 1.27  |
| 224.713800            | 160.865100 | 235.319900 |        |         |       |       |
| 2.887800              | 2.405800   | 2.483800   |        |         |       |       |
| 33.286800             | 33.294300  | 33.357000  |        |         |       |       |
| 179.291400            | 145.646500 | 176.576100 |        |         |       |       |
| 0.998348              | 0.998185   | 0.998733   |        |         |       |       |

29.48

30.13

30.09

| Well /<br>Cycle  | Raw fluorescence data |            |            | Well /<br>Cycle | C9      | D2    | D3   |
|------------------|-----------------------|------------|------------|-----------------|---------|-------|------|
|                  | C9                    | D2         | D3         |                 |         |       |      |
| 0.56             | 87.90                 | 82.39      | 86.32      | 0.56            | -0.0379 | 0.00  | 0.01 |
| 1.56             | 88.06                 | 84.00      | 87.36      | 1.56            | -0.0361 | 0.02  | 0.02 |
| 2.56             | 88.36                 | 84.87      | 87.28      | 2.56            | -0.0328 | 0.03  | 0.02 |
| 3.56             | 90.37                 | 84.05      | 88.47      | 3.56            | -0.0108 | 0.02  | 0.03 |
| 4.56             | 89.88                 | 83.35      | 87.36      | 4.56            | -0.0162 | 0.01  | 0.02 |
| 5.56             | 91.06                 | 83.24      | 88.58      | 5.56            | -0.0033 | 0.01  | 0.03 |
| 6.56             | 90.95                 | 84.63      | 87.31      | 6.56            | -0.0045 | 0.03  | 0.02 |
| 7.56             | 90.47                 | 85.48      | 87.12      | 7.56            | -0.0097 | 0.04  | 0.02 |
| 8.56             | 92.68                 | 83.81      | 87.46      | 8.56            | 0.0145  | 0.02  | 0.02 |
| 9.56             | 91.77                 | 84.29      | 85.79      | 9.56            | 0.0045  | 0.02  | 0.00 |
| 10.56            | 92.05                 | 82.84      | 86.07      | 10.56           | 0.0076  | 0.01  | 0.00 |
| 11.56            | 92.26                 | 82.66      | 87.37      | 11.56           | 0.0099  | 0.00  | 0.02 |
| 12.56            | 94.31                 | 84.48      | 86.98      | 12.56           | 0.0323  | 0.03  | 0.01 |
| 13.56            | 92.09                 | 82.66      | 86.59      | 13.56           | 0.0080  | 0.00  | 0.01 |
| 14.56            | 93.25                 | 82.73      | 86.87      | 14.56           | 0.0207  | 0.00  | 0.01 |
| 15.56            | 94.42                 | 82.40      | 86.15      | 15.56           | 0.0335  | 0.00  | 0.00 |
| 16.58            | 94.45                 | 82.35      | 85.63      | 16.58           | 0.0338  | 0.00  | 0.00 |
| 17.58            | 95.40                 | 82.50      | 85.48      | 17.58           | 0.0442  | 0.00  | 0.00 |
| 18.58            | 94.01                 | 81.57      | 85.47      | 18.58           | 0.0290  | -0.01 | 0.00 |
| 19.58            | 94.74                 | 82.00      | 85.94      | 19.58           | 0.0370  | 0.00  | 0.00 |
| 20.58            | 94.92                 | 82.12      | 85.82      | 20.58           | 0.0390  | 0.00  | 0.00 |
| 21.58            | 95.55                 | 83.19      | 86.36      | 21.58           | 0.0459  | 0.01  | 0.01 |
| 22.58            | 94.68                 | 83.18      | 87.46      | 22.58           | 0.0364  | 0.01  | 0.02 |
| 23.58            | 97.96                 | 85.09      | 86.52      | 23.58           | 0.0723  | 0.03  | 0.01 |
| 24.58            | 98.93                 | 85.63      | 88.94      | 24.58           | 0.0829  | 0.04  | 0.04 |
| 25.58            | 102.63                | 87.00      | 90.82      | 25.58           | 0.1234  | 0.06  | 0.06 |
| 26.58            | 106.71                | 92.79      | 95.78      | 26.58           | 0.1680  | 0.13  | 0.12 |
| 27.58            | 113.63                | 99.79      | 102.11     | 27.58           | 0.2438  | 0.21  | 0.19 |
| 28.56            | 127.87                | 112.55     | 114.33     | 28.56           | 0.3996  | 0.37  | 0.33 |
| 29.61            | 140.12                | 123.07     | 128.45     | 29.61           | 0.5337  | 0.49  | 0.50 |
| 30.56            | 162.27                | 143.48     | 147.66     | 30.56           | 0.7762  | 0.74  | 0.72 |
| 31.63            | 181.45                | 158.62     | 169.57     | 31.63           | 0.9861  | 0.93  | 0.98 |
| 32.63            | 199.79                | 173.53     | 188.01     | 32.63           | 1.1869  | 1.11  | 1.19 |
| 33.63            | 222.37                | 193.40     | 214.51     | 33.63           | 1.4340  | 1.35  | 1.50 |
| 34.63            | 240.32                | 207.41     | 231.58     | 34.63           | 1.6305  | 1.52  | 1.70 |
| 35.63            | 256.38                | 219.09     | 245.19     | 35.63           | 1.8063  | 1.66  | 1.86 |
| 36.63            | 273.64                | 231.45     | 265.34     | 36.63           | 1.9952  | 1.81  | 2.09 |
| 37.65            | 285.20                | 245.77     | 280.17     | 37.65           | 2.1218  | 1.98  | 2.27 |
| 38.65            | 297.00                | 255.35     | 290.94     | 38.65           | 2.2509  | 2.10  | 2.39 |
| 39.65            | 311.22                | 263.40     | 303.33     | 39.65           | 2.4066  | 2.20  | 2.54 |
| <b>Parameter</b> |                       |            |            |                 |         |       |      |
| a                | 231.752900            | 187.575500 | 225.555800 |                 |         |       |      |
| b                | 2.670100              | 2.505800   | 2.410400   |                 |         |       |      |
| x0               | 33.015700             | 32.791800  | 33.119500  |                 |         |       |      |
| y0               | 91.358900             | 82.358100  | 85.790100  |                 |         |       |      |
| R                | 0.999367              | 0.998961   | 0.999236   |                 |         |       |      |

|                           |       |       |       |
|---------------------------|-------|-------|-------|
| <b>CP<sub>(SDM)</sub></b> | 29.50 | 29.49 | 29.95 |
|---------------------------|-------|-------|-------|

| C9           |                             |                             | D2           |                             |  |
|--------------|-----------------------------|-----------------------------|--------------|-----------------------------|--|
| Well / Cycle | FAM Normalized Fluorescence | VIC Normalized Fluorescence | Well / Cycle | FAM Normalized Fluorescence |  |
| 0.56         | -0.074802249                | -0.03786057                 | 0.56         | -0.012883935                |  |
| 1.56         | -0.037488692                | -0.036109235                | 1.56         | 0.002907725                 |  |
| 2.56         | -0.010605082                | -0.032825483                | 2.56         | 0.018768045                 |  |
| 3.56         | -0.007370125                | -0.010824342                | 3.56         | 0.007233267                 |  |
| 4.56         | -0.00513912                 | -0.016187804                | 4.56         | 0.035864233                 |  |
| 5.56         | -0.008318302                | -0.003271712                | 5.56         | -0.000181947                |  |
| 6.56         | 0.001944321                 | -0.004475754                | 6.56         | 0.02261297                  |  |
| 7.56         | -0.00502757                 | -0.009729758                | 7.56         | 0.007713883                 |  |
| 8.56         | -0.006812374                | 0.014460551                 | 8.56         | 0.031332713                 |  |
| 9.56         | 0.018732633                 | 0.004499835                 | 9.56         | 0.003868957                 |  |
| 10.56        | 0.011481867                 | 0.007564671                 | 10.56        | 0.01705156                  |  |
| 11.56        | 0.009864388                 | 0.009863297                 | 11.56        | 0.017188879                 |  |
| 12.56        | 0.020684762                 | 0.032302272                 | 12.56        | 0.023642861                 |  |
| 13.56        | 0.020907863                 | 0.008002504                 | 13.56        | -0.000868541                |  |
| 14.56        | 0.016892054                 | 0.02069968                  | 14.56        | 0.000435987                 |  |
| 15.56        | 0.023808169                 | 0.033506314                 | 15.56        | -0.018514005                |  |
| 16.58        | 0.023194643                 | 0.033834689                 | 16.58        | 0.005516782                 |  |
| 17.58        | 0.025425648                 | 0.044233238                 | 17.58        | -0.001829773                |  |
| 18.58        | 0.032230213                 | 0.029018519                 | 18.58        | -0.001143179                |  |
| 19.58        | 0.018230657                 | 0.037008983                 | 19.58        | 0.008331817                 |  |
| 20.58        | 0.021075188                 | 0.038979235                 | 20.58        | -0.017758751                |  |
| 21.58        | 0.03295529                  | 0.045875115                 | 21.58        | -0.00773448                 |  |
| 22.58        | 0.022134916                 | 0.036352233                 | 22.58        | -0.012746616                |  |
| 23.58        | 0.047345271                 | 0.072254592                 | 23.58        | -0.014394441                |  |
| 24.58        | 0.049743602                 | 0.082872057                 | 24.58        | -0.007940459                |  |
| 25.58        | 0.075121283                 | 0.123371669                 | 25.58        | 0.020278551                 |  |
| 26.58        | 0.086666734                 | 0.168030701                 | 26.58        | 0.032156626                 |  |
| 27.58        | 0.118904755                 | 0.243775921                 | 27.58        | 0.087015479                 |  |
| 28.56        | 0.197380354                 | 0.399644698                 | 28.56        | 0.117225611                 |  |
| 29.61        | 0.279815987                 | 0.533731251                 | 29.61        | 0.238684074                 |  |
| 30.56        | 0.360355265                 | 0.776181631                 | 30.56        | 0.284823185                 |  |
| 31.63        | 0.462814167                 | 0.986122863                 | 31.63        | 0.379092529                 |  |
| 32.63        | 0.590371875                 | 1.186869588                 | 32.63        | 0.485239947                 |  |
| 33.63        | 0.673365259                 | 1.434026679                 | 33.63        | 0.611161271                 |  |
| 34.63        | 0.748103925                 | 1.630504527                 | 34.63        | 0.667187334                 |  |
| 35.63        | 0.864450833                 | 1.806294734                 | 35.63        | 0.783359023                 |  |
| 36.63        | 0.935842991                 | 1.995219951                 | 36.63        | 0.873234166                 |  |
| 37.65        | 1.002382713                 | 2.121753874                 | 37.65        | 0.948828156                 |  |
| 38.65        | 1.08866683                  | 2.250914799                 | 38.65        | 1.000803315                 |  |
| 39.65        | 1.155987404                 | 2.406564659                 | 39.65        | 1.050032098                 |  |

| Experiment derived linear regression on |            |
|-----------------------------------------|------------|
| parameter                               | value      |
| y0                                      | 0.009      |
| a                                       | 0.4753     |
| R                                       | 0.99753434 |

| Experiment derived linear regression on |            |
|-----------------------------------------|------------|
| parameter                               | value      |
| y0                                      | -0.014     |
| a                                       | 0.4357     |
| R                                       | 0.99141641 |

| D3                          |              |                             |                             |
|-----------------------------|--------------|-----------------------------|-----------------------------|
| VIC Normalized Fluorescence | Well / Cycle | FAM Normalized Fluorescence | VIC Normalized Fluorescence |
| 0.000387333                 | 0.56         | -0.034750456                | 0.006176703                 |
| 0.019936108                 | 1.56         | -0.013683052                | 0.018299314                 |
| 0.030499732                 | 2.56         | 0.011914976                 | 0.017366806                 |
| 0.020543213                 | 3.56         | 0.006421594                 | 0.03123787                  |
| 0.012043746                 | 4.56         | 0.026752771                 | 0.018299314                 |
| 0.010708115                 | 5.56         | 0.003420055                 | 0.032520069                 |
| 0.027585629                 | 6.56         | 0.031623192                 | 0.017716496                 |
| 0.037906411                 | 7.56         | 0.004949141                 | 0.015501789                 |
| 0.01762911                  | 8.56         | 0.009762929                 | 0.01946495                  |
| 0.023457316                 | 9.56         | 0.002797094                 | -1.16564E-06                |
| 0.005851276                 | 10.56        | 0.018484382                 | 0.003262614                 |
| 0.003665699                 | 11.56        | 0.011405281                 | 0.018415878                 |
| 0.025764315                 | 12.56        | 0.013047632                 | 0.013869899                 |
| 0.003665699                 | 13.56        | 0.00472261                  | 0.00932392                  |
| 0.004515646                 | 14.56        | 0.013274163                 | 0.0125877                   |
| 0.000508754                 | 15.56        | -0.003205983                | 0.004195123                 |
| -9.8351E-05                 | 16.58        | 0.010272625                 | -0.001866183                |
| 0.001722963                 | 17.58        | -0.00031771                 | -0.003614636                |
| -0.009569186                | 18.58        | 0.016615499                 | -0.0037312                  |
| -0.004348085                | 19.58        | 0.009932828                 | 0.001747288                 |
| -0.002891033                | 20.58        | 0.000928212                 | 0.000348525                 |
| 0.01010101                  | 21.58        | 0.013047632                 | 0.006642958                 |
| 0.009979589                 | 22.58        | -0.016627958                | 0.01946495                  |
| 0.033170994                 | 23.58        | 0.001777704                 | 0.008507975                 |
| 0.039727726                 | 24.58        | 0.014236921                 | 0.036716358                 |
| 0.056362398                 | 25.58        | 0.026639506                 | 0.058630308                 |
| 0.126665137                 | 26.58        | 0.046234456                 | 0.116445837                 |
| 0.211659812                 | 27.58        | 0.10745452                  | 0.190230574                 |
| 0.366592964                 | 28.56        | 0.146191359                 | 0.332671252                 |
| 0.49432782                  | 29.61        | 0.265856478                 | 0.497259008                 |
| 0.74214801                  | 30.56        | 0.34440618                  | 0.721177618                 |
| 0.925979351                 | 31.63        | 0.460899861                 | 0.976568392                 |
| 1.10701801                  | 32.63        | 0.594836447                 | 1.191511608                 |
| 1.348281468                 | 33.63        | 0.718975558                 | 1.500405058                 |
| 1.518392241                 | 34.63        | 0.80460436                  | 1.699379066                 |
| 1.660211928                 | 35.63        | 0.942505243                 | 1.858022079                 |
| 1.810288241                 | 36.63        | 1.024169749                 | 2.092897665                 |
| 1.984163063                 | 37.65        | 1.105834255                 | 2.265761434                 |
| 2.100484348                 | 38.65        | 1.203582478                 | 2.391300395                 |
| 2.198228225                 | 39.65        | 1.268936736                 | 2.535722653                 |

| Experiment derived linear regression |              |
|--------------------------------------|--------------|
| parameter                            | value        |
| y0                                   | -0.0014      |
| a                                    | 0.4906       |
| R                                    | 0.99728241   |
| average                              |              |
| y0                                   | -0.002133333 |
| a                                    | 0.4672       |

| Well /<br>Cycle  | Raw fluorescence data |            |            | Well /<br>Cycle | D4      | D5    | D6    |
|------------------|-----------------------|------------|------------|-----------------|---------|-------|-------|
|                  | D4                    | D5         | D6         |                 |         |       |       |
| 0.56             | 130.12                | 159.40     | 167.25     | 0.56            | -0.0472 | -0.04 | -0.03 |
| 1.56             | 132.71                | 163.22     | 173.07     | 1.56            | -0.0283 | -0.02 | 0.00  |
| 2.56             | 134.38                | 165.57     | 176.28     | 2.56            | -0.0160 | 0.00  | 0.02  |
| 3.56             | 136.57                | 164.06     | 172.85     | 3.56            | 0.0000  | -0.01 | 0.00  |
| 4.56             | 135.62                | 167.44     | 175.29     | 4.56            | -0.0069 | 0.01  | 0.02  |
| 5.56             | 134.38                | 164.99     | 173.56     | 5.56            | -0.0160 | -0.01 | 0.01  |
| 6.56             | 136.71                | 167.28     | 176.17     | 6.56            | 0.0010  | 0.01  | 0.02  |
| 7.56             | 137.55                | 167.57     | 174.01     | 7.56            | 0.0072  | 0.01  | 0.01  |
| 8.56             | 138.53                | 169.08     | 175.32     | 8.56            | 0.0144  | 0.02  | 0.02  |
| 9.56             | 137.69                | 166.72     | 174.92     | 9.56            | 0.0082  | 0.00  | 0.01  |
| 10.56            | 138.12                | 168.77     | 175.87     | 10.56           | 0.0114  | 0.02  | 0.02  |
| 11.56            | 137.34                | 166.81     | 171.73     | 11.56           | 0.0056  | 0.01  | 0.00  |
| 12.56            | 139.64                | 168.62     | 174.21     | 12.56           | 0.0225  | 0.02  | 0.01  |
| 13.56            | 136.04                | 165.84     | 174.19     | 13.56           | -0.0039 | 0.00  | 0.01  |
| 14.56            | 138.42                | 167.07     | 172.87     | 14.56           | 0.0136  | 0.01  | 0.00  |
| 15.56            | 136.57                | 166.75     | 172.86     | 15.56           | 0.0000  | 0.00  | 0.00  |
| 16.58            | 137.73                | 167.64     | 172.23     | 16.58           | 0.0085  | 0.01  | 0.00  |
| 17.58            | 137.93                | 164.82     | 172.49     | 17.58           | 0.0100  | -0.01 | 0.00  |
| 18.58            | 139.10                | 170.63     | 172.85     | 18.58           | 0.0185  | 0.03  | 0.00  |
| 19.58            | 138.81                | 168.06     | 174.83     | 19.58           | 0.0164  | 0.01  | 0.01  |
| 20.58            | 137.21                | 169.46     | 172.51     | 20.58           | 0.0047  | 0.02  | 0.00  |
| 21.58            | 138.98                | 167.97     | 175.13     | 21.58           | 0.0177  | 0.01  | 0.02  |
| 22.58            | 137.81                | 165.87     | 172.15     | 22.58           | 0.0091  | 0.00  | 0.00  |
| 23.58            | 140.14                | 170.61     | 173.76     | 23.58           | 0.0261  | 0.03  | 0.01  |
| 24.58            | 138.66                | 166.61     | 173.09     | 24.58           | 0.0153  | 0.00  | 0.00  |
| 25.58            | 141.77                | 172.42     | 177.98     | 25.58           | 0.0381  | 0.04  | 0.03  |
| 26.58            | 142.61                | 171.95     | 180.28     | 26.58           | 0.0442  | 0.04  | 0.05  |
| 27.58            | 145.95                | 181.45     | 190.71     | 27.58           | 0.0687  | 0.09  | 0.11  |
| 28.56            | 152.19                | 184.39     | 196.95     | 28.56           | 0.1144  | 0.11  | 0.14  |
| 29.61            | 161.59                | 198.60     | 223.82     | 29.61           | 0.1832  | 0.20  | 0.30  |
| 30.56            | 169.44                | 207.22     | 234.97     | 30.56           | 0.2407  | 0.25  | 0.36  |
| 31.63            | 178.72                | 221.06     | 252.30     | 31.63           | 0.3086  | 0.33  | 0.46  |
| 32.63            | 192.41                | 236.54     | 276.53     | 32.63           | 0.4089  | 0.43  | 0.60  |
| 33.63            | 210.33                | 247.54     | 291.29     | 33.63           | 0.5401  | 0.49  | 0.69  |
| 34.63            | 212.39                | 259.56     | 303.72     | 34.63           | 0.5552  | 0.56  | 0.76  |
| 35.63            | 244.92                | 274.48     | 325.54     | 35.63           | 0.7934  | 0.65  | 0.89  |
| 36.63            | 249.58                | 285.93     | 345.78     | 36.63           | 0.8275  | 0.72  | 1.01  |
| 37.65            | 257.20                | 293.70     | 355.61     | 37.65           | 0.8833  | 0.77  | 1.06  |
| 38.65            | 265.09                | 304.15     | 372.38     | 38.65           | 0.9411  | 0.83  | 1.16  |
| 39.65            | 275.23                | 315.73     | 379.81     | 39.65           | 1.0153  | 0.90  | 1.20  |
| <b>Parameter</b> |                       |            |            |                 |         |       |       |
| <b>a</b>         | 151.089800            | 159.660600 | 220.085300 |                 |         |       |       |
| <b>b</b>         | 2.521500              | 2.688400   | 2.563100   |                 |         |       |       |
| <b>x0</b>        | 33.951000             | 33.527700  | 33.231600  |                 |         |       |       |
| <b>y0</b>        | 136.568900            | 165.957200 | 172.377900 |                 |         |       |       |
| <b>R</b>         | 0.997774              | 0.998378   | 0.998223   |                 |         |       |       |

CP<sub>(SDM)</sub>      30.63      29.99      29.86

| Well /<br>Cycle           | Raw fluorescence data |            |            | Well /<br>Cycle | D4      | D5   | D6    |
|---------------------------|-----------------------|------------|------------|-----------------|---------|------|-------|
|                           | D4                    | D5         | D6         |                 |         |      |       |
| 0.56                      | 89.42                 | 132.83     | 115.58     | 0.56            | 0.0124  | 0.03 | 0.01  |
| 1.56                      | 88.87                 | 132.34     | 118.35     | 1.56            | 0.0062  | 0.02 | 0.03  |
| 2.56                      | 89.12                 | 132.52     | 118.78     | 2.56            | 0.0090  | 0.02 | 0.03  |
| 3.56                      | 90.99                 | 135.29     | 117.24     | 3.56            | 0.0302  | 0.04 | 0.02  |
| 4.56                      | 89.36                 | 131.99     | 114.71     | 4.56            | 0.0117  | 0.02 | 0.00  |
| 5.56                      | 90.93                 | 131.76     | 116.21     | 5.56            | 0.0295  | 0.02 | 0.01  |
| 6.56                      | 90.68                 | 132.86     | 118.00     | 6.56            | 0.0267  | 0.03 | 0.03  |
| 7.56                      | 90.82                 | 133.35     | 115.95     | 7.56            | 0.0282  | 0.03 | 0.01  |
| 8.56                      | 90.03                 | 132.73     | 118.47     | 8.56            | 0.0193  | 0.02 | 0.03  |
| 9.56                      | 89.42                 | 131.25     | 116.46     | 9.56            | 0.0124  | 0.01 | 0.01  |
| 10.56                     | 91.13                 | 130.20     | 116.19     | 10.56           | 0.0317  | 0.01 | 0.01  |
| 11.56                     | 89.04                 | 129.94     | 117.48     | 11.56           | 0.0081  | 0.00 | 0.02  |
| 12.56                     | 90.07                 | 130.76     | 117.68     | 12.56           | 0.0197  | 0.01 | 0.02  |
| 13.56                     | 90.89                 | 132.54     | 115.93     | 13.56           | 0.0290  | 0.02 | 0.01  |
| 14.56                     | 89.82                 | 130.31     | 116.66     | 14.56           | 0.0169  | 0.01 | 0.02  |
| 15.56                     | 88.60                 | 129.04     | 117.10     | 15.56           | 0.0031  | 0.00 | 0.02  |
| 16.58                     | 89.00                 | 130.12     | 115.37     | 16.58           | 0.0076  | 0.00 | 0.00  |
| 17.58                     | 89.23                 | 130.75     | 115.06     | 17.58           | 0.0102  | 0.01 | 0.00  |
| 18.58                     | 88.77                 | 130.25     | 115.85     | 18.58           | 0.0050  | 0.01 | 0.01  |
| 19.58                     | 88.16                 | 129.95     | 114.26     | 19.58           | -0.0019 | 0.00 | -0.01 |
| 20.58                     | 88.80                 | 131.91     | 114.31     | 20.58           | 0.0054  | 0.02 | -0.01 |
| 21.58                     | 89.68                 | 133.02     | 115.10     | 21.58           | 0.0153  | 0.03 | 0.00  |
| 22.58                     | 90.83                 | 129.16     | 115.98     | 22.58           | 0.0284  | 0.00 | 0.01  |
| 23.58                     | 90.85                 | 135.40     | 117.62     | 23.58           | 0.0286  | 0.05 | 0.02  |
| 24.58                     | 94.67                 | 136.50     | 120.88     | 24.58           | 0.0718  | 0.05 | 0.05  |
| 25.58                     | 94.91                 | 144.73     | 125.14     | 25.58           | 0.0745  | 0.12 | 0.09  |
| 26.58                     | 101.98                | 158.13     | 134.30     | 26.58           | 0.1546  | 0.22 | 0.17  |
| 27.58                     | 117.08                | 170.72     | 145.35     | 27.58           | 0.3255  | 0.32 | 0.27  |
| 28.56                     | 135.57                | 200.09     | 170.21     | 28.56           | 0.5349  | 0.54 | 0.48  |
| 29.61                     | 153.28                | 238.12     | 196.61     | 29.61           | 0.7354  | 0.84 | 0.71  |
| 30.56                     | 178.38                | 288.54     | 232.29     | 30.56           | 1.0196  | 1.23 | 1.02  |
| 31.63                     | 200.98                | 337.17     | 267.96     | 31.63           | 1.2754  | 1.60 | 1.33  |
| 32.63                     | 222.84                | 382.22     | 301.34     | 32.63           | 1.5229  | 1.95 | 1.62  |
| 33.63                     | 250.95                | 442.35     | 343.07     | 33.63           | 1.8412  | 2.42 | 1.99  |
| 34.63                     | 267.97                | 483.61     | 374.59     | 34.63           | 2.0339  | 2.73 | 2.26  |
| 35.63                     | 284.32                | 520.64     | 399.15     | 35.63           | 2.2190  | 3.02 | 2.47  |
| 36.63                     | 301.25                | 553.62     | 423.02     | 36.63           | 2.4107  | 3.27 | 2.68  |
| 37.65                     | 313.05                | 581.64     | 446.41     | 37.65           | 2.5443  | 3.49 | 2.89  |
| 38.65                     | 328.24                | 615.28     | 459.04     | 38.65           | 2.7162  | 3.75 | 3.00  |
| 39.65                     | 346.35                | 634.07     | 480.16     | 39.65           | 2.9213  | 3.90 | 3.18  |
| <b>Parameter</b>          |                       |            |            |                 |         |      |       |
| <b>a</b>                  | 259.448000            | 517.739900 | 370.682400 |                 |         |      |       |
| <b>b</b>                  | 2.489800              | 2.348700   | 2.318700   |                 |         |      |       |
| <b>x0</b>                 | 32.464100             | 32.744000  | 32.599900  |                 |         |      |       |
| <b>y0</b>                 | 88.325700             | 129.519200 | 114.901000 |                 |         |      |       |
| <b>R</b>                  | 0.998782              | 0.999383   | 0.999373   |                 |         |      |       |
| <b>CP<sub>(SDM)</sub></b> | 29.19                 | 29.65      | 29.55      |                 |         |      |       |

| Well / Cycle | FAM Normalized Fluorescence | VIC Normalized Fluorescence | Well / Cycle | FAM Normalized Fluorescence |
|--------------|-----------------------------|-----------------------------|--------------|-----------------------------|
| 0. 56        | -0. 047220853               | 0. 012389373                | 0. 56        | -0. 039511392               |
| 1. 56        | -0. 028256067               | 0. 006162419                | 1. 56        | -0. 016493409               |
| 2. 56        | -0. 016027807               | 0. 008992853                | 2. 56        | -0. 002333132               |
| 3. 56        | 8. 05454E-06                | 0. 030164493                | 3. 56        | -0. 011431863               |
| 4. 56        | -0. 006948141               | 0. 011710069                | 4. 56        | 0. 008934834                |
| 5. 56        | -0. 016027807               | 0. 029485189                | 5. 56        | -0. 005828009               |
| 6. 56        | 0. 001033178                | 0. 026654756                | 6. 56        | 0. 00797073                 |
| 7. 56        | 0. 00718392                 | 0. 028239799                | 7. 56        | 0. 009718168                |
| 8. 56        | 0. 014359785                | 0. 01929563                 | 8. 56        | 0. 0188169                  |
| 9. 56        | 0. 008209043                | 0. 012389373                | 9. 56        | 0. 004596366                |
| 10. 56       | 0. 011357637                | 0. 031749536                | 10. 56       | 0. 016948948                |
| 11. 56       | 0. 005646234                | 0. 008087114                | 11. 56       | 0. 005138674                |
| 12. 56       | 0. 02248755                 | 0. 019748499                | 12. 56       | 0. 016045101                |
| 13. 56       | -0. 00387277                | 0. 02903232                 | 13. 56       | -0. 000706206               |
| 14. 56       | 0. 01355433                 | 0. 016918066                | 14. 56       | 0. 006705343                |
| 15. 56       | 8. 05454E-06                | 0. 003105551                | 15. 56       | 0. 004777135                |
| 16. 58       | 0. 008501936                | 0. 007634245                | 16. 58       | 0. 010139964                |
| 17. 58       | 0. 009966398                | 0. 010238243                | 17. 58       | -0. 006852369               |
| 18. 58       | 0. 018533502                | 0. 005030246                | 18. 58       | 0. 028156657                |
| 19. 58       | 0. 016410032                | -0. 001876011               | 19. 58       | 0. 012670737                |
| 20. 58       | 0. 004694334                | 0. 005369898                | 20. 58       | 0. 021106647                |
| 21. 58       | 0. 017654825                | 0. 015333023                | 21. 58       | 0. 012128428                |
| 22. 58       | 0. 009087721                | 0. 028353016                | 22. 58       | -0. 000525437               |
| 23. 58       | 0. 026148706                | 0. 028579451                | 23. 58       | 0. 028036144                |
| 24. 58       | 0. 015311685                | 0. 071828471                | 24. 58       | 0. 003933544                |
| 25. 58       | 0. 038084073                | 0. 074545687                | 25. 58       | 0. 038942571                |
| 26. 58       | 0. 044234815                | 0. 15459034                 | 26. 58       | 0. 036110515                |
| 27. 58       | 0. 068691335                | 0. 32554851                 | 27. 58       | 0. 09335419                 |
| 28. 56       | 0. 114382557                | 0. 534887354                | 28. 56       | 0. 111069601                |
| 29. 61       | 0. 183212283                | 0. 735395247                | 29. 61       | 0. 196694087                |
| 30. 56       | 0. 240692427                | 1. 019570748                | 30. 56       | 0. 24863519                 |
| 31. 63       | 0. 308643476                | 1. 275441916                | 31. 63       | 0. 332030186                |
| 32. 63       | 0. 408885918                | 1. 522935001                | 32. 63       | 0. 425307248                |
| 33. 63       | 0. 540101736                | 1. 841188918                | 33. 63       | 0. 491589398                |
| 34. 63       | 0. 555185697                | 2. 033884815                | 34. 63       | 0. 564017711                |
| 35. 63       | 0. 793380484                | 2. 218995151                | 35. 63       | 0. 653920408                |
| 36. 63       | 0. 827502455                | 2. 410672092                | 36. 63       | 0. 722914101                |
| 37. 65       | 0. 883298467                | 2. 544268542                | 37. 65       | 0. 769733401                |
| 38. 65       | 0. 941071503                | 2. 716245668                | 38. 65       | 0. 832701444                |
| 39. 65       | 1. 01531974                 | 2. 921282254                | 39. 65       | 0. 90247847                 |

| Experiment derived linear regression |            |
|--------------------------------------|------------|
| parameter                            | value      |
| y0                                   | -0. 0138   |
| a                                    | 0. 2631    |
| R                                    | 0.99372558 |

| Experiment derived linear regression |           |
|--------------------------------------|-----------|
| parameter                            | value     |
| y0                                   | 0. 0052   |
| a                                    | 0. 2098   |
| R                                    | 0.9938927 |

| VIC Normalized<br>Fluorescence | Well /<br>Cycle | FAM Normalized<br>Fluorescence | VIC Normalized<br>Fluorescence |
|--------------------------------|-----------------|--------------------------------|--------------------------------|
| 0.025562233                    | 0.56            | -0.029748013                   | 0.005909435                    |
| 0.02177901                     | 1.56            | 0.004015016                    | 0.030017145                    |
| 0.023168766                    | 2.56            | 0.022636893                    | 0.033759497                    |
| 0.044555556                    | 3.56            | 0.00273875                     | 0.020356655                    |
| 0.019076708                    | 4.56            | 0.016893697                    | -0.001662301                   |
| 0.01730091                     | 5.56            | 0.006857608                    | 0.011392416                    |
| 0.025793859                    | 6.56            | 0.02199876                     | 0.026971045                    |
| 0.029577082                    | 7.56            | 0.009468151                    | 0.009129599                    |
| 0.024790147                    | 8.56            | 0.017067733                    | 0.031061523                    |
| 0.01336327                     | 9.56            | 0.01474725                     | 0.013568202                    |
| 0.005256364                    | 10.56           | 0.020258397                    | 0.011218353                    |
| 0.003248939                    | 11.56           | -0.003758602                   | 0.02244541                     |
| 0.009580047                    | 12.56           | 0.010628393                    | 0.024186038                    |
| 0.023323183                    | 13.56           | 0.010512368                    | 0.008955536                    |
| 0.006105658                    | 14.56           | 0.002854774                    | 0.015308831                    |
| -0.003699838                   | 15.56           | 0.002796762                    | 0.019138215                    |
| 0.004638694                    | 16.58           | -0.000857999                   | 0.004081775                    |
| 0.009502838                    | 17.58           | 0.000650315                    | 0.0013838                      |
| 0.005642407                    | 18.58           | 0.00273875                     | 0.008259284                    |
| 0.003326148                    | 19.58           | 0.014225141                    | -0.005578716                   |
| 0.018459039                    | 20.58           | 0.00076634                     | -0.005143558                   |
| 0.027029197                    | 21.58           | 0.015965504                    | 0.001731926                    |
| -0.002773334                   | 22.58           | -0.001322095                   | 0.009390693                    |
| 0.045404851                    | 23.58           | 0.008017849                    | 0.02366385                     |
| 0.0538978                      | 24.58           | 0.00413104                     | 0.052036101                    |
| 0.117440503                    | 25.58           | 0.032498946                    | 0.089111496                    |
| 0.220900067                    | 26.58           | 0.045841723                    | 0.168832299                    |
| 0.318105733                    | 27.58           | 0.10634832                     | 0.265002045                    |
| 0.544867479                    | 28.56           | 0.142547856                    | 0.481362216                    |
| 0.838491899                    | 29.61           | 0.298426306                    | 0.71112523                     |
| 1.227777812                    | 30.56           | 0.363109772                    | 1.021653423                    |
| 1.60324338                     | 31.63           | 0.463644702                    | 1.332094586                    |
| 1.951068259                    | 32.63           | 0.604207964                    | 1.622605547                    |
| 2.415323751                    | 33.63           | 0.68983379                     | 1.985787765                    |
| 2.733886559                    | 34.63           | 0.761942801                    | 2.260110878                    |
| 3.019790116                    | 35.63           | 0.888525153                    | 2.473860106                    |
| 3.274424178                    | 36.63           | 1.005941597                    | 2.681604164                    |
| 3.490762759                    | 37.65           | 1.062967469                    | 2.885170712                    |
| 3.750492591                    | 38.65           | 1.160253722                    | 2.995091427                    |
| 3.895567607                    | 39.65           | 1.203356695                    | 3.178901837                    |

**Experiment derived linear regression**

| parameter | value      |
|-----------|------------|
| y0        | -0.0063    |
| a         | 0.3692     |
| R         | 0.99274487 |

| average | value        |
|---------|--------------|
| y0      | -0.004966667 |
| a       | 0.2807       |



| Well /<br>Cycle | Raw fluorescence data |            |            | Well /<br>Cycle | D7      | D8    | D9    |
|-----------------|-----------------------|------------|------------|-----------------|---------|-------|-------|
|                 | D7                    | D8         | D9         |                 |         |       |       |
| 0.56            | 225.89                | 226.07     | 183.59     | 0.56            | -0.0453 | -0.03 | -0.04 |
| 1.56            | 234.51                | 230.34     | 186.41     | 1.56            | -0.0089 | -0.01 | -0.03 |
| 2.56            | 238.37                | 239.26     | 190.43     | 2.56            | 0.0074  | 0.02  | 0.00  |
| 3.56            | 236.82                | 234.46     | 188.54     | 3.56            | 0.0009  | 0.00  | -0.01 |
| 4.56            | 243.07                | 236.06     | 193.36     | 4.56            | 0.0273  | 0.01  | 0.01  |
| 5.56            | 239.87                | 235.25     | 191.98     | 5.56            | 0.0138  | 0.01  | 0.00  |
| 6.56            | 239.65                | 241.00     | 193.13     | 6.56            | 0.0128  | 0.03  | 0.01  |
| 7.56            | 237.17                | 236.74     | 193.63     | 7.56            | 0.0024  | 0.01  | 0.01  |
| 8.56            | 241.81                | 237.42     | 196.53     | 8.56            | 0.0220  | 0.02  | 0.03  |
| 9.56            | 240.76                | 236.41     | 190.68     | 9.56            | 0.0175  | 0.01  | 0.00  |
| 10.56           | 237.51                | 237.90     | 192.16     | 10.56           | 0.0038  | 0.02  | 0.00  |
| 11.56           | 236.44                | 233.28     | 192.30     | 11.56           | -0.0007 | 0.00  | 0.01  |
| 12.56           | 234.93                | 237.02     | 194.01     | 12.56           | -0.0071 | 0.01  | 0.01  |
| 13.56           | 235.44                | 234.39     | 190.47     | 13.56           | -0.0049 | 0.00  | 0.00  |
| 14.56           | 240.59                | 242.30     | 196.10     | 14.56           | 0.0168  | 0.04  | 0.03  |
| 15.56           | 236.41                | 235.80     | 192.10     | 15.56           | -0.0008 | 0.01  | 0.00  |
| 16.58           | 239.27                | 235.17     | 191.76     | 16.58           | 0.0112  | 0.01  | 0.00  |
| 17.58           | 238.13                | 235.80     | 194.26     | 17.58           | 0.0064  | 0.01  | 0.02  |
| 18.58           | 237.68                | 236.22     | 197.29     | 18.58           | 0.0045  | 0.01  | 0.03  |
| 19.58           | 238.06                | 235.05     | 192.13     | 19.58           | 0.0061  | 0.01  | 0.00  |
| 20.58           | 238.61                | 230.35     | 191.43     | 20.58           | 0.0085  | -0.01 | 0.00  |
| 21.58           | 239.83                | 231.07     | 193.21     | 21.58           | 0.0136  | -0.01 | 0.01  |
| 22.58           | 237.02                | 228.92     | 194.62     | 22.58           | 0.0017  | -0.02 | 0.02  |
| 23.58           | 239.52                | 234.22     | 193.93     | 23.58           | 0.0123  | 0.00  | 0.01  |
| 24.58           | 239.84                | 230.05     | 194.38     | 24.58           | 0.0137  | -0.02 | 0.02  |
| 25.58           | 246.26                | 238.06     | 199.83     | 25.58           | 0.0408  | 0.02  | 0.04  |
| 26.58           | 248.10                | 237.21     | 198.32     | 26.58           | 0.0486  | 0.02  | 0.04  |
| 27.58           | 252.71                | 253.67     | 208.14     | 27.58           | 0.0680  | 0.09  | 0.09  |
| 28.56           | 261.36                | 255.46     | 212.81     | 28.56           | 0.1046  | 0.09  | 0.11  |
| 29.61           | 277.45                | 275.13     | 230.39     | 29.61           | 0.1726  | 0.18  | 0.20  |
| 30.56           | 288.78                | 292.80     | 237.77     | 30.56           | 0.2205  | 0.25  | 0.24  |
| 31.63           | 300.33                | 310.05     | 251.25     | 31.63           | 0.2693  | 0.33  | 0.31  |
| 32.63           | 315.91                | 333.44     | 266.61     | 32.63           | 0.3351  | 0.43  | 0.39  |
| 33.63           | 324.10                | 345.74     | 283.38     | 33.63           | 0.3698  | 0.48  | 0.48  |
| 34.63           | 336.53                | 363.86     | 296.61     | 34.63           | 0.4223  | 0.56  | 0.55  |
| 35.63           | 348.71                | 389.24     | 314.95     | 35.63           | 0.4738  | 0.67  | 0.65  |
| 36.63           | 366.70                | 406.29     | 329.43     | 36.63           | 0.5498  | 0.74  | 0.72  |
| 37.65           | 374.11                | 418.76     | 345.42     | 37.65           | 0.5811  | 0.79  | 0.81  |
| 38.65           | 391.67                | 443.42     | 355.96     | 38.65           | 0.6553  | 0.90  | 0.86  |
| 39.65           | 399.58                | 458.60     | 366.15     | 39.65           | 0.6888  | 0.96  | 0.91  |
| Parameter       |                       |            |            |                 |         |       |       |
| a               | 182.901700            | 243.151300 | 197.443200 |                 |         |       |       |
| b               | 3.044000              | 2.659200   | 2.833300   |                 |         |       |       |
| x0              | 33.835400             | 34.016500  | 34.088600  |                 |         |       |       |
| y0              | 236.610200            | 233.667700 | 191.307000 |                 |         |       |       |
| R               | 0.997165              | 0.996890   | 0.998542   |                 |         |       |       |

CP<sub>(SDM)</sub>      29.83      30.51      30.36

| Well /<br>Cycle  | Raw fluorescence data |            |            | Well /<br>Cycle | D7      | D8    | D9    |
|------------------|-----------------------|------------|------------|-----------------|---------|-------|-------|
|                  | D7                    | D8         | D9         |                 |         |       |       |
| 0.56             | 111.95                | 111.23     | 100.10     | 0.56            | -0.0068 | 0.01  | -0.01 |
| 1.56             | 112.95                | 113.70     | 104.72     | 1.56            | 0.0021  | 0.03  | 0.03  |
| 2.56             | 114.32                | 112.04     | 101.52     | 2.56            | 0.0142  | 0.02  | 0.00  |
| 3.56             | 116.45                | 112.96     | 104.12     | 3.56            | 0.0331  | 0.02  | 0.03  |
| 4.56             | 112.93                | 112.70     | 103.34     | 4.56            | 0.0019  | 0.02  | 0.02  |
| 5.56             | 114.42                | 115.36     | 102.30     | 5.56            | 0.0151  | 0.05  | 0.01  |
| 6.56             | 111.88                | 115.07     | 102.97     | 6.56            | -0.0074 | 0.04  | 0.02  |
| 7.56             | 114.25                | 114.87     | 102.98     | 7.56            | 0.0136  | 0.04  | 0.02  |
| 8.56             | 114.63                | 113.40     | 103.48     | 8.56            | 0.0170  | 0.03  | 0.02  |
| 9.56             | 115.12                | 114.07     | 104.03     | 9.56            | 0.0213  | 0.03  | 0.03  |
| 10.56            | 114.93                | 111.77     | 103.67     | 10.56           | 0.0196  | 0.01  | 0.02  |
| 11.56            | 115.98                | 112.58     | 104.10     | 11.56           | 0.0289  | 0.02  | 0.03  |
| 12.56            | 115.53                | 112.70     | 103.18     | 12.56           | 0.0249  | 0.02  | 0.02  |
| 13.56            | 114.56                | 112.84     | 102.94     | 13.56           | 0.0163  | 0.02  | 0.02  |
| 14.56            | 112.69                | 111.62     | 103.21     | 14.56           | -0.0003 | 0.01  | 0.02  |
| 15.56            | 113.90                | 112.97     | 102.21     | 15.56           | 0.0105  | 0.02  | 0.01  |
| 16.58            | 116.05                | 111.21     | 101.86     | 16.58           | 0.0296  | 0.01  | 0.01  |
| 17.58            | 114.89                | 112.50     | 102.79     | 17.58           | 0.0193  | 0.02  | 0.02  |
| 18.58            | 116.11                | 110.02     | 102.78     | 18.58           | 0.0301  | 0.00  | 0.02  |
| 19.58            | 114.12                | 107.88     | 101.21     | 19.58           | 0.0124  | -0.02 | 0.00  |
| 20.58            | 115.83                | 111.37     | 101.37     | 20.58           | 0.0276  | 0.01  | 0.00  |
| 21.58            | 114.51                | 109.26     | 102.65     | 21.58           | 0.0159  | -0.01 | 0.01  |
| 22.58            | 118.46                | 111.24     | 102.68     | 22.58           | 0.0509  | 0.01  | 0.01  |
| 23.58            | 119.67                | 112.65     | 104.29     | 23.58           | 0.0617  | 0.02  | 0.03  |
| 24.58            | 122.65                | 116.51     | 106.31     | 24.58           | 0.0881  | 0.06  | 0.05  |
| 25.58            | 128.85                | 120.53     | 111.72     | 25.58           | 0.1431  | 0.09  | 0.10  |
| 26.58            | 140.67                | 134.71     | 121.02     | 26.58           | 0.2480  | 0.22  | 0.20  |
| 27.58            | 152.94                | 147.78     | 133.88     | 27.58           | 0.3568  | 0.34  | 0.32  |
| 28.56            | 177.11                | 176.93     | 159.40     | 28.56           | 0.5713  | 0.60  | 0.57  |
| 29.61            | 203.92                | 211.27     | 184.75     | 29.61           | 0.8091  | 0.91  | 0.83  |
| 30.56            | 233.49                | 260.67     | 222.26     | 30.56           | 1.0714  | 1.36  | 1.20  |
| 31.63            | 263.50                | 305.79     | 260.15     | 31.63           | 1.3377  | 1.77  | 1.57  |
| 32.63            | 288.75                | 345.64     | 294.68     | 32.63           | 1.5617  | 2.13  | 1.91  |
| 33.63            | 322.76                | 400.63     | 332.94     | 33.63           | 1.8634  | 2.63  | 2.29  |
| 34.63            | 350.26                | 431.09     | 365.84     | 34.63           | 2.1074  | 2.91  | 2.61  |
| 35.63            | 367.06                | 466.07     | 388.81     | 35.63           | 2.2564  | 3.22  | 2.84  |
| 36.63            | 390.09                | 499.44     | 412.98     | 36.63           | 2.4607  | 3.53  | 3.08  |
| 37.65            | 412.17                | 529.33     | 431.33     | 37.65           | 2.6566  | 3.80  | 3.26  |
| 38.65            | 433.18                | 542.28     | 454.01     | 38.65           | 2.8430  | 3.91  | 3.49  |
| 39.65            | 448.73                | 564.97     | 466.62     | 39.65           | 2.9810  | 4.12  | 3.61  |
| <b>Parameter</b> |                       |            |            |                 |         |       |       |
| a                | 349.345500            | 461.967300 | 371.601300 |                 |         |       |       |
| b                | 2.680500              | 2.283700   | 2.308900   |                 |         |       |       |
| x0               | 32.586700             | 32.540200  | 32.481900  |                 |         |       |       |
| y0               | 112.718700            | 110.348500 | 101.223400 |                 |         |       |       |
| R                | 0.999158              | 0.999234   | 0.999359   |                 |         |       |       |

CP<sub>(SDM)</sub>      29.06      29.53      29.44

| D7           |                             |                             | D8           |                             |  |
|--------------|-----------------------------|-----------------------------|--------------|-----------------------------|--|
| Well / Cycle | FAM Normalized Fluorescence | VIC Normalized Fluorescence | Well / Cycle | FAM Normalized Fluorescence |  |
| 0.56         | -0.04530743                 | -0.006819632                | 0.56         | -0.032514977                |  |
| 1.56         | -0.008876202                | 0.002052011                 | 1.56         | -0.014241164                |  |
| 2.56         | 0.007437549                 | 0.014206161                 | 2.56         | 0.023932704                 |  |
| 3.56         | 0.00088669                  | 0.033102759                 | 3.56         | 0.003390713                 |  |
| 4.56         | 0.027301443                 | 0.001874578                 | 4.56         | 0.010238043                 |  |
| 5.56         | 0.01377709                  | 0.015093325                 | 5.56         | 0.006771582                 |  |
| 6.56         | 0.012847291                 | -0.007440646                | 6.56         | 0.031379176                 |  |
| 7.56         | 0.002365917                 | 0.013585146                 | 7.56         | 0.013148159                 |  |
| 8.56         | 0.021976229                 | 0.01695637                  | 8.56         | 0.016058274                 |  |
| 9.56         | 0.017538551                 | 0.021303475                 | 9.56         | 0.011735897                 |  |
| 10.56        | 0.003802879                 | 0.019617863                 | 10.56        | 0.018112473                 |  |
| 11.56        | -0.000719327                | 0.028933087                 | 11.56        | -0.001659194                |  |
| 12.56        | -0.007101131                | 0.024940848                 | 12.56        | 0.014346442                 |  |
| 13.56        | -0.004945687                | 0.016335355                 | 13.56        | 0.003091142                 |  |
| 14.56        | 0.016820069                 | -0.000254616                | 14.56        | 0.036942633                 |  |
| 15.56        | -0.000846117                | 0.010480071                 | 15.56        | 0.009125352                 |  |
| 16.58        | 0.011241274                 | 0.029554102                 | 16.58        | 0.006429216                 |  |
| 17.58        | 0.006423223                 | 0.019262997                 | 17.58        | 0.009125352                 |  |
| 18.58        | 0.00452136                  | 0.030086401                 | 18.58        | 0.010922776                 |  |
| 19.58        | 0.006127377                 | 0.012431833                 | 19.58        | 0.005915666                 |  |
| 20.58        | 0.008451876                 | 0.027602341                 | 20.58        | -0.014198368                |  |
| 21.58        | 0.013608035                 | 0.015891773                 | 21.58        | -0.011117069                |  |
| 22.58        | 0.001731963                 | 0.050934761                 | 22.58        | -0.02031817                 |  |
| 23.58        | 0.012297864                 | 0.061669448                 | 23.58        | 0.002363613                 |  |
| 24.58        | 0.013650299                 | 0.088106942                 | 24.58        | -0.015482243                |  |
| 25.58        | 0.040783533                 | 0.143111125                 | 25.58        | 0.018797206                 |  |
| 26.58        | 0.048560037                 | 0.247973939                 | 26.58        | 0.015159562                 |  |
| 27.58        | 0.068043559                 | 0.356828991                 | 27.58        | 0.085601476                 |  |
| 28.56        | 0.104601577                 | 0.571256588                 | 28.56        | 0.093261927                 |  |
| 29.61        | 0.172603717                 | 0.809105321                 | 29.61        | 0.177441298                 |  |
| 30.56        | 0.220488381                 | 1.071439788                 | 30.56        | 0.253061506                 |  |
| 31.63        | 0.269302845                 | 1.337677777                 | 31.63        | 0.326884289                 |  |
| 32.63        | 0.335149541                 | 1.561686748                 | 32.63        | 0.426983704                 |  |
| 33.63        | 0.369763434                 | 1.863411306                 | 33.63        | 0.479622558                 |  |
| 34.63        | 0.422297095                 | 2.107381473                 | 34.63        | 0.557168577                 |  |
| 35.63        | 0.473774165                 | 2.256425065                 | 35.63        | 0.66578436                  |  |
| 36.63        | 0.54980639                  | 2.46073899                  | 36.63        | 0.738751227                 |  |
| 37.65        | 0.581123722                 | 2.656624855                 | 37.65        | 0.79211761                  |  |
| 38.65        | 0.655338612                 | 2.843018062                 | 38.65        | 0.897652093                 |  |
| 39.65        | 0.688769123                 | 2.980972101                 | 39.65        | 0.962616142                 |  |

| Experiment derived linear regression on parameter |  | value      |
|---------------------------------------------------|--|------------|
| y0                                                |  | -0.0093    |
| a                                                 |  | 0.2155     |
| R                                                 |  | 0.99768911 |

| Experiment derived linear regression on parameter |  | value      |
|---------------------------------------------------|--|------------|
| y0                                                |  | -0.0126    |
| a                                                 |  | 0.1997     |
| R                                                 |  | 0.99265544 |

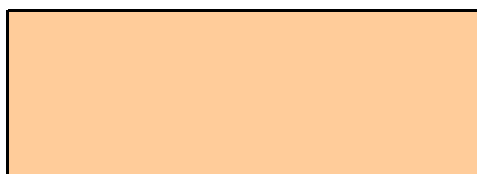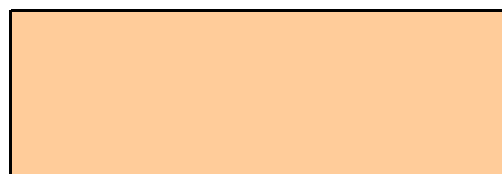

| <b>D9</b>                      |                 |                                |                                |  |
|--------------------------------|-----------------|--------------------------------|--------------------------------|--|
| VIC Normalized<br>Fluorescence | Well /<br>Cycle | FAM Normalized<br>Fluorescence | VIC Normalized<br>Fluorescence |  |
| 0.007988328                    | 0.56            | -0.040338304                   | -0.011098224                   |  |
| 0.030371958                    | 1.56            | -0.0255976                     | 0.034543396                    |  |
| 0.015328709                    | 2.56            | -0.004584255                   | 0.002930153                    |  |
| 0.023665931                    | 3.56            | -0.014463663                   | 0.028615913                    |  |
| 0.02130976                     | 4.56            | 0.010731442                    | 0.020910185                    |  |
| 0.045415207                    | 5.56            | 0.003517906                    | 0.010635881                    |  |
| 0.04278717                     | 6.56            | 0.009529186                    | 0.017254904                    |  |
| 0.04097473                     | 7.56            | 0.012142786                    | 0.017353695                    |  |
| 0.027653298                    | 8.56            | 0.027301667                    | 0.022293264                    |  |
| 0.033724971                    | 9.56            | -0.003277455                   | 0.02772679                     |  |
| 0.012881915                    | 10.56           | 0.004458802                    | 0.024170301                    |  |
| 0.020222296                    | 11.56           | 0.00519061                     | 0.02841833                     |  |
| 0.02130976                     | 12.56           | 0.014129122                    | 0.019329523                    |  |
| 0.022578467                    | 13.56           | -0.004375167                   | 0.016958529                    |  |
| 0.011522585                    | 14.56           | 0.025053971                    | 0.019625897                    |  |
| 0.023756553                    | 15.56           | 0.00414517                     | 0.009746758                    |  |
| 0.007807084                    | 16.56           | 0.002367922                    | 0.00628906                     |  |
| 0.01949732                     | 17.56           | 0.015435922                    | 0.015476659                    |  |
| -0.002976932                   | 18.56           | 0.031274339                    | 0.015377867                    |  |
| -0.022370037                   | 19.56           | 0.004301986                    | -0.00013238                    |  |
| 0.009257036                    | 20.56           | 0.000642946                    | 0.001448282                    |  |
| -0.009864203                   | 21.56           | 0.009947362                    | 0.014093579                    |  |
| 0.00807895                     | 22.56           | 0.017317714                    | 0.014389953                    |  |
| 0.02085665                     | 23.56           | 0.013710946                    | 0.030295366                    |  |
| 0.055836735                    | 24.56           | 0.016063186                    | 0.050251226                    |  |
| 0.092266773                    | 25.56           | 0.044551428                    | 0.103697366                    |  |
| 0.220768746                    | 26.56           | 0.036658355                    | 0.195573356                    |  |
| 0.339211679                    | 27.56           | 0.087989462                    | 0.322619078                    |  |
| 0.603374763                    | 28.56           | 0.112400487                    | 0.574734696                    |  |
| 0.914570656                    | 29.56           | 0.204294668                    | 0.82517086                     |  |
| 1.362243257                    | 30.56           | 0.242871406                    | 1.195737349                    |  |
| 1.771129648                    | 31.56           | 0.313334065                    | 1.570057912                    |  |
| 2.132258255                    | 32.56           | 0.393623861                    | 1.911184568                    |  |
| 2.630588544                    | 33.56           | 0.481284009                    | 2.289160412                    |  |
| 2.906623108                    | 34.56           | 0.550439869                    | 2.614184072                    |  |
| 3.223618808                    | 35.56           | 0.646306722                    | 2.841107886                    |  |
| 3.526024368                    | 36.56           | 0.721996581                    | 3.079886667                    |  |
| 3.796893478                    | 37.56           | 0.805579514                    | 3.26116886                     |  |
| 3.914248948                    | 38.56           | 0.860674204                    | 3.485227724                    |  |
| 4.119870229                    | 39.56           | 0.913939375                    | 3.609803662                    |  |

| <b>Experiment derived linear regression</b> |                   |
|---------------------------------------------|-------------------|
| parameter                                   | value             |
| <b>y0</b>                                   | <b>0.0121</b>     |
| <b>a</b>                                    | <b>0.1981</b>     |
| <b>R</b>                                    | <b>0.99242474</b> |

|           |                     |
|-----------|---------------------|
| <b>y0</b> | <b>-0.003266667</b> |
| <b>a</b>  | <b>0.204433333</b>  |

| Well /<br>Cycle           | Raw fluorescence data |            |            | Well /<br>Cycle | E2      | E3    | E4    |
|---------------------------|-----------------------|------------|------------|-----------------|---------|-------|-------|
|                           | E2                    | E3         | E4         |                 |         |       |       |
| 0.56                      | 165.26                | 174.18     | 167.18     | 0.56            | -0.0483 | -0.04 | -0.04 |
| 1.56                      | 172.18                | 178.01     | 169.74     | 1.56            | -0.0085 | -0.02 | -0.02 |
| 2.56                      | 175.10                | 179.49     | 171.92     | 2.56            | 0.0083  | -0.01 | -0.01 |
| 3.56                      | 172.52                | 181.59     | 172.00     | 3.56            | -0.0065 | 0.00  | -0.01 |
| 4.56                      | 176.30                | 182.00     | 173.00     | 4.56            | 0.0152  | 0.00  | 0.00  |
| 5.56                      | 174.99                | 179.64     | 170.59     | 5.56            | 0.0077  | -0.01 | -0.02 |
| 6.56                      | 176.74                | 183.15     | 173.00     | 6.56            | 0.0178  | 0.01  | 0.00  |
| 7.56                      | 175.02                | 183.56     | 174.99     | 7.56            | 0.0079  | 0.01  | 0.01  |
| 8.56                      | 175.77                | 182.35     | 175.35     | 8.56            | 0.0122  | 0.00  | 0.01  |
| 9.56                      | 173.53                | 182.22     | 176.71     | 9.56            | -0.0007 | 0.00  | 0.02  |
| 10.56                     | 176.95                | 185.04     | 177.27     | 10.56           | 0.0190  | 0.02  | 0.02  |
| 11.56                     | 174.70                | 182.55     | 174.44     | 11.56           | 0.0060  | 0.01  | 0.00  |
| 12.56                     | 176.69                | 185.48     | 174.97     | 12.56           | 0.0175  | 0.02  | 0.01  |
| 13.56                     | 176.94                | 184.48     | 174.18     | 13.56           | 0.0189  | 0.02  | 0.00  |
| 14.56                     | 176.09                | 184.18     | 175.68     | 14.56           | 0.0140  | 0.01  | 0.01  |
| 15.56                     | 173.37                | 180.65     | 174.39     | 15.56           | -0.0016 | 0.00  | 0.00  |
| 16.58                     | 175.81                | 184.24     | 176.09     | 16.58           | 0.0124  | 0.01  | 0.01  |
| 17.58                     | 174.20                | 182.32     | 175.83     | 17.58           | 0.0031  | 0.00  | 0.01  |
| 18.58                     | 175.97                | 185.38     | 177.39     | 18.58           | 0.0133  | 0.02  | 0.02  |
| 19.58                     | 173.70                | 183.37     | 176.01     | 19.58           | 0.0003  | 0.01  | 0.01  |
| 20.58                     | 173.58                | 179.50     | 173.94     | 20.58           | -0.0004 | -0.01 | 0.00  |
| 21.58                     | 173.73                | 183.74     | 177.93     | 21.58           | 0.0004  | 0.01  | 0.02  |
| 22.58                     | 170.09                | 181.22     | 175.36     | 22.58           | -0.0205 | 0.00  | 0.01  |
| 23.58                     | 176.10                | 182.82     | 178.35     | 23.58           | 0.0141  | 0.01  | 0.03  |
| 24.58                     | 175.10                | 183.76     | 174.47     | 24.58           | 0.0083  | 0.01  | 0.00  |
| 25.58                     | 177.30                | 186.99     | 177.80     | 25.58           | 0.0210  | 0.03  | 0.02  |
| 26.58                     | 178.29                | 185.08     | 177.76     | 26.58           | 0.0267  | 0.02  | 0.02  |
| 27.58                     | 186.40                | 192.26     | 183.39     | 27.58           | 0.0734  | 0.06  | 0.06  |
| 28.56                     | 188.48                | 192.41     | 183.91     | 28.56           | 0.0854  | 0.06  | 0.06  |
| 29.61                     | 202.29                | 203.31     | 194.22     | 29.61           | 0.1649  | 0.12  | 0.12  |
| 30.56                     | 210.27                | 212.04     | 197.17     | 30.56           | 0.2109  | 0.17  | 0.14  |
| 31.63                     | 221.79                | 218.62     | 202.67     | 31.63           | 0.2772  | 0.20  | 0.17  |
| 32.63                     | 235.80                | 237.33     | 214.64     | 32.63           | 0.3579  | 0.31  | 0.24  |
| 33.63                     | 245.01                | 244.29     | 221.36     | 33.63           | 0.4109  | 0.35  | 0.27  |
| 34.63                     | 253.40                | 254.55     | 228.34     | 34.63           | 0.4592  | 0.40  | 0.31  |
| 35.63                     | 270.23                | 266.31     | 241.63     | 35.63           | 0.5561  | 0.47  | 0.39  |
| 36.63                     | 280.91                | 274.86     | 249.16     | 36.63           | 0.6176  | 0.51  | 0.43  |
| 37.65                     | 286.76                | 287.37     | 254.77     | 37.65           | 0.6513  | 0.58  | 0.47  |
| 38.65                     | 301.78                | 298.16     | 263.88     | 38.65           | 0.7378  | 0.64  | 0.52  |
| 39.65                     | 308.24                | 304.75     | 275.46     | 39.65           | 0.7750  | 0.68  | 0.59  |
| <b>a</b>                  | 146.345300            | 136.996900 | 120.808000 |                 |         |       |       |
| <b>b</b>                  | 2.697000              | 2.699200   | 3.094900   |                 |         |       |       |
| <b>x0</b>                 | 33.795000             | 34.190900  | 35.049400  |                 |         |       |       |
| <b>y0</b>                 | 173.653200            | 181.556400 | 173.703500 |                 |         |       |       |
| <b>R</b>                  | 0.997336              | 0.997354   | 0.996683   |                 |         |       |       |
| <b>CP<sub>(SDM)</sub></b> | 30.24                 | 30.64      | 30.97      |                 |         |       |       |

| Well /<br>Cycle  | Raw fluorescence data |            |            | Well /<br>Cycle | E2      | E3    | E4   |
|------------------|-----------------------|------------|------------|-----------------|---------|-------|------|
|                  | E2                    | E3         | E4         |                 |         |       |      |
| 0.56             | 84.95                 | 90.20      | 105.44     | 0.56            | -0.0066 | -0.03 | 0.00 |
| 1.56             | 85.60                 | 92.42      | 106.52     | 1.56            | 0.0010  | 0.00  | 0.01 |
| 2.56             | 86.36                 | 92.63      | 105.15     | 2.56            | 0.0099  | 0.00  | 0.00 |
| 3.56             | 86.88                 | 91.43      | 105.57     | 3.56            | 0.0159  | -0.01 | 0.00 |
| 4.56             | 86.59                 | 93.04      | 105.32     | 4.56            | 0.0126  | 0.00  | 0.00 |
| 5.56             | 87.19                 | 94.87      | 107.99     | 5.56            | 0.0196  | 0.02  | 0.02 |
| 6.56             | 87.21                 | 93.49      | 105.87     | 6.56            | 0.0198  | 0.01  | 0.00 |
| 7.56             | 86.23                 | 93.83      | 105.77     | 7.56            | 0.0083  | 0.01  | 0.00 |
| 8.56             | 85.89                 | 93.66      | 106.24     | 8.56            | 0.0044  | 0.01  | 0.01 |
| 9.56             | 86.04                 | 94.49      | 105.75     | 9.56            | 0.0061  | 0.02  | 0.00 |
| 10.56            | 87.05                 | 92.63      | 106.48     | 10.56           | 0.0179  | 0.00  | 0.01 |
| 11.56            | 87.40                 | 93.97      | 106.91     | 11.56           | 0.0220  | 0.01  | 0.01 |
| 12.56            | 87.36                 | 95.55      | 106.72     | 12.56           | 0.0216  | 0.03  | 0.01 |
| 13.56            | 87.30                 | 94.70      | 107.58     | 13.56           | 0.0209  | 0.02  | 0.02 |
| 14.56            | 87.41                 | 93.49      | 108.60     | 14.56           | 0.0221  | 0.01  | 0.03 |
| 15.56            | 87.68                 | 94.10      | 107.33     | 15.56           | 0.0253  | 0.02  | 0.02 |
| 16.58            | 85.77                 | 92.76      | 107.75     | 16.58           | 0.0030  | 0.00  | 0.02 |
| 17.58            | 87.71                 | 92.94      | 108.40     | 17.58           | 0.0256  | 0.00  | 0.03 |
| 18.58            | 86.05                 | 93.66      | 108.01     | 18.58           | 0.0062  | 0.01  | 0.02 |
| 19.58            | 87.28                 | 94.59      | 109.45     | 19.58           | 0.0206  | 0.02  | 0.04 |
| 20.58            | 86.59                 | 95.42      | 108.35     | 20.58           | 0.0126  | 0.03  | 0.03 |
| 21.58            | 86.90                 | 96.57      | 109.35     | 21.58           | 0.0162  | 0.04  | 0.04 |
| 22.58            | 88.18                 | 95.80      | 109.57     | 22.58           | 0.0311  | 0.03  | 0.04 |
| 23.58            | 89.88                 | 97.23      | 112.09     | 23.58           | 0.0510  | 0.05  | 0.06 |
| 24.58            | 92.56                 | 99.26      | 115.64     | 24.58           | 0.0824  | 0.07  | 0.10 |
| 25.58            | 97.58                 | 101.97     | 119.63     | 25.58           | 0.1411  | 0.10  | 0.13 |
| 26.58            | 106.98                | 111.92     | 131.35     | 26.58           | 0.2510  | 0.21  | 0.24 |
| 27.58            | 119.15                | 120.98     | 143.49     | 27.58           | 0.3933  | 0.31  | 0.36 |
| 28.56            | 141.93                | 142.42     | 171.93     | 28.56           | 0.6597  | 0.54  | 0.63 |
| 29.61            | 166.64                | 166.32     | 201.71     | 29.61           | 0.9486  | 0.80  | 0.91 |
| 30.56            | 196.83                | 196.89     | 243.97     | 30.56           | 1.3017  | 1.13  | 1.31 |
| 31.63            | 220.23                | 226.45     | 278.01     | 31.63           | 1.5753  | 1.45  | 1.63 |
| 32.63            | 244.53                | 254.02     | 315.69     | 32.63           | 1.8594  | 1.74  | 1.99 |
| 33.63            | 275.81                | 286.85     | 357.37     | 33.63           | 2.2252  | 2.10  | 2.39 |
| 34.63            | 297.90                | 313.34     | 384.89     | 34.63           | 2.4835  | 2.38  | 2.65 |
| 35.63            | 312.03                | 328.82     | 410.99     | 35.63           | 2.6488  | 2.55  | 2.89 |
| 36.63            | 327.39                | 347.98     | 434.69     | 36.63           | 2.8284  | 2.76  | 3.12 |
| 37.65            | 339.04                | 359.37     | 448.76     | 37.65           | 2.9646  | 2.88  | 3.25 |
| 38.65            | 349.66                | 374.70     | 473.53     | 38.65           | 3.0888  | 3.05  | 3.49 |
| 39.65            | 362.58                | 386.27     | 488.78     | 39.65           | 3.2399  | 3.17  | 3.63 |
| <b>Parameter</b> |                       |            |            |                 |         |       |      |
| <b>a</b>         | 277.385900            | 296.198200 | 387.529200 |                 |         |       |      |
| <b>b</b>         | 2.330700              | 2.277900   | 2.358600   |                 |         |       |      |
| <b>x0</b>        | 31.825800             | 32.189500  | 32.256500  |                 |         |       |      |
| <b>y0</b>        | 85.516700             | 92.608200  | 105.520200 |                 |         |       |      |
| <b>R</b>         | 0.999374              | 0.999502   | 0.999389   |                 |         |       |      |

CP<sub>(SDM)</sub>      28.76      29.19      29.15

| E2                                                      |                                |                                | E3                                                      |                                |  |
|---------------------------------------------------------|--------------------------------|--------------------------------|---------------------------------------------------------|--------------------------------|--|
| Well /<br>Cycle                                         | FAM Normalized<br>Fluorescence | VIC Normalized<br>Fluorescence | Well /<br>Cycle                                         | FAM Normalized<br>Fluorescence |  |
| 0.56                                                    | -0.048333115                   | -0.006626776                   | 0.56                                                    | -0.040628697                   |  |
| 1.56                                                    | -0.008483575                   | 0.000974079                    | 1.56                                                    | -0.019533324                   |  |
| 2.56                                                    | 0.008331548                    | 0.009861232                    | 2.56                                                    | -0.011381587                   |  |
| 3.56                                                    | -0.00652565                    | 0.015941915                    | 3.56                                                    | 0.000185066                    |  |
| 4.56                                                    | 0.015241873                    | 0.012550765                    | 4.56                                                    | 0.002443318                    |  |
| 5.56                                                    | 0.007698102                    | 0.019566938                    | 5.56                                                    | -0.010555398                   |  |
| 6.56                                                    | 0.017775659                    | 0.019800811                    | 6.56                                                    | 0.008777438                    |  |
| 7.56                                                    | 0.00787086                     | 0.008341061                    | 7.56                                                    | 0.011035689                    |  |
| 8.56                                                    | 0.012189813                    | 0.004365229                    | 8.56                                                    | 0.004371094                    |  |
| 9.56                                                    | -0.00070946                    | 0.006119273                    | 9.56                                                    | 0.003655063                    |  |
| 10.56                                                   | 0.018984965                    | 0.017929831                    | 10.56                                                   | 0.019187426                    |  |
| 11.56                                                   | 0.006028107                    | 0.022022599                    | 11.56                                                   | 0.00547268                     |  |
| 12.56                                                   | 0.017487728                    | 0.021554854                    | 12.56                                                   | 0.021610915                    |  |
| 13.56                                                   | 0.018927379                    | 0.020853237                    | 13.56                                                   | 0.016102985                    |  |
| 14.56                                                   | 0.014032566                    | 0.022139535                    | 14.56                                                   | 0.014450606                    |  |
| 15.56                                                   | -0.001630837                   | 0.025296813                    | 15.56                                                   | -0.004992388                   |  |
| 16.58                                                   | 0.012420157                    | 0.002961995                    | 16.58                                                   | 0.014781082                    |  |
| 17.58                                                   | 0.003148805                    | 0.025647622                    | 17.58                                                   | 0.004205856                    |  |
| 18.58                                                   | 0.013341534                    | 0.006236209                    | 18.58                                                   | 0.021060122                    |  |
| 19.58                                                   | 0.000269503                    | 0.020619364                    | 19.58                                                   | 0.009989182                    |  |
| 20.58                                                   | -0.00042153                    | 0.012550765                    | 20.58                                                   | -0.011326508                   |  |
| 21.58                                                   | 0.000442261                    | 0.016175788                    | 21.58                                                   | 0.012027117                    |  |
| 22.58                                                   | -0.020519058                   | 0.031143625                    | 22.58                                                   | -0.001852868                   |  |
| 23.58                                                   | 0.014090152                    | 0.051022783                    | 23.58                                                   | 0.006959821                    |  |
| 24.58                                                   | 0.008331548                    | 0.082361691                    | 24.58                                                   | 0.012137275                    |  |
| 25.58                                                   | 0.021000477                    | 0.141063675                    | 25.58                                                   | 0.02992789                     |  |
| 26.58                                                   | 0.026701495                    | 0.250983726                    | 26.58                                                   | 0.019407743                    |  |
| 27.58                                                   | 0.073403773                    | 0.393295111                    | 27.58                                                   | 0.058954683                    |  |
| 28.56                                                   | 0.085381669                    | 0.659675829                    | 28.56                                                   | 0.059780873                    |  |
| 29.61                                                   | 0.164907989                    | 0.948625239                    | 29.61                                                   | 0.119817313                    |  |
| 30.56                                                   | 0.210861648                    | 1.3016557                      | 30.56                                                   | 0.167901545                    |  |
| 31.63                                                   | 0.277200766                    | 1.575286465                    | 31.63                                                   | 0.204143726                    |  |
| 32.63                                                   | 0.357878807                    | 1.859441489                    | 32.63                                                   | 0.307197102                    |  |
| 33.63                                                   | 0.410915549                    | 2.225217998                    | 33.63                                                   | 0.345532297                    |  |
| 34.63                                                   | 0.459230236                    | 2.483530118                    | 34.63                                                   | 0.402043662                    |  |
| 35.63                                                   | 0.55614754                     | 2.648761002                    | 35.63                                                   | 0.466816923                    |  |
| 36.63                                                   | 0.61764943                     | 2.828375043                    | 36.63                                                   | 0.513909727                    |  |
| 37.65                                                   | 0.651337263                    | 2.964605744                    | 37.65                                                   | 0.582813936                    |  |
| 38.65                                                   | 0.737831494                    | 3.088792014                    | 38.65                                                   | 0.642244504                    |  |
| 39.65                                                   | 0.775032075                    | 3.239873615                    | 39.65                                                   | 0.678541764                    |  |
| Experiment derived linear regression<br>parameter value |                                |                                | Experiment derived linear regression<br>parameter value |                                |  |
| y0                                                      | -0.0147                        |                                | y0                                                      | -0.0026                        |  |
| a                                                       | 0.1807                         |                                | a                                                       | 0.1461                         |  |
| R                                                       | 0.99006553                     |                                | R                                                       | 0.9859991                      |  |

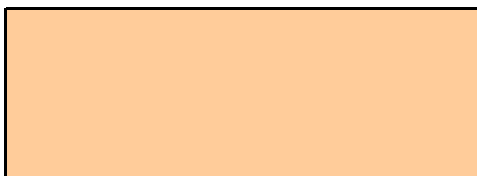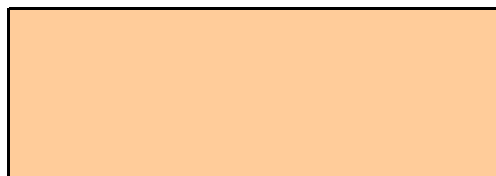

| <b>E4</b>                      |                 |                                 |                                |
|--------------------------------|-----------------|---------------------------------|--------------------------------|
| VIC Normalized<br>Fluorescence | Well /<br>Cycle | FAM Normal ized<br>Fluorescence | VIC Normalized<br>Fluorescence |
| -0.026004177                   | 0.56            | -0.037555375                    | -0.000760044                   |
| -0.002032217                   | 1.56            | -0.022817617                    | 0.009474963                    |
| 0.0002354                      | 2.56            | -0.010267496                    | -0.003508333                   |
| -0.012722416                   | 3.56            | -0.009806941                    | 0.000471948                    |
| 0.004662654                    | 4.56            | -0.004050005                    | -0.001897267                   |
| 0.024423323                    | 5.56            | -0.017924221                    | 0.023405945                    |
| 0.009521835                    | 6.56            | -0.004050005                    | 0.003315005                    |
| 0.013193216                    | 7.56            | 0.007406299                     | 0.002367319                    |
| 0.011357526                    | 8.56            | 0.009478796                     | 0.006821443                    |
| 0.020320015                    | 9.56            | 0.017308229                     | 0.002177782                    |
| 0.0002354                      | 10.56           | 0.020532114                     | 0.009095889                    |
| 0.014704961                    | 11.56           | 0.004239984                     | 0.013170938                    |
| 0.031766086                    | 12.56           | 0.00729116                      | 0.011370335                    |
| 0.022587633                    | 13.56           | 0.00274318                      | 0.019520433                    |
| 0.009521835                    | 14.56           | 0.011378585                     | 0.029186829                    |
| 0.016108725                    | 15.56           | 0.003952137                     | 0.017151218                    |
| 0.001639164                    | 16.56           | 0.013738929                     | 0.021131499                    |
| 0.003582836                    | 17.56           | 0.012242125                     | 0.027291457                    |
| 0.011357526                    | 18.56           | 0.021222946                     | 0.023595482                    |
| 0.021399833                    | 19.56           | 0.013278374                     | 0.037242158                    |
| 0.030362322                    | 20.56           | 0.001361515                     | 0.026817614                    |
| 0.042780229                    | 21.56           | 0.024331692                     | 0.036294473                    |
| 0.03446563                     | 22.56           | 0.009536365                     | 0.038379381                    |
| 0.049907028                    | 23.56           | 0.026749605                     | 0.062261065                    |
| 0.071827333                    | 24.56           | 0.004412692                     | 0.095903912                    |
| 0.1010904                      | 25.56           | 0.02358329                      | 0.133716577                    |
| 0.20853229                     | 26.56           | 0.023353012                     | 0.244785359                    |
| 0.306363799                    | 27.56           | 0.055764564                     | 0.35983442                     |
| 0.537876775                    | 28.56           | 0.058758171                     | 0.629356275                    |
| 0.795953274                    | 29.56           | 0.118112185                     | 0.91157712                     |
| 1.126053632                    | 30.56           | 0.135095148                     | 1.312069158                    |
| 1.445247829                    | 31.56           | 0.166758298                     | 1.63466142                     |
| 1.742953648                    | 32.56           | 0.235668826                     | 1.991749447                    |
| 2.097457892                    | 33.56           | 0.274355439                     | 2.386744908                    |
| 2.383501677                    | 34.56           | 0.314538855                     | 2.647548052                    |
| 2.550657501                    | 35.56           | 0.39104854                      | 2.894894058                    |
| 2.757550627                    | 36.56           | 0.434398271                     | 3.119495604                    |
| 2.880541896                    | 37.56           | 0.466694684                     | 3.252835002                    |
| 3.046077993                    | 38.56           | 0.519140374                     | 3.487576786                    |
| 3.171012934                    | 39.56           | 0.585805698                     | 3.632098878                    |

| <b>Experiment derived linear regression</b> |                   |
|---------------------------------------------|-------------------|
| parameter                                   | value             |
| <b>y0</b>                                   | <b>0.0092</b>     |
| <b>a</b>                                    | <b>0.0987</b>     |
| <b>R</b>                                    | <b>0.97456685</b> |

| <b>AVERAGE</b> |                    |
|----------------|--------------------|
| parameter      | value              |
| <b>y0</b>      | <b>-0.0027</b>     |
| <b>a</b>       | <b>0.141833333</b> |



| Well /<br>Cycle  | Raw fluorescence data |            |            | Well /<br>Cycle | E5      | E6    | E7    |
|------------------|-----------------------|------------|------------|-----------------|---------|-------|-------|
|                  | E5                    | E6         | E7         |                 |         |       |       |
| 0.56             | 185.08                | 193.07     | 211.09     | 0.56            | -0.0363 | -0.04 | -0.03 |
| 1.56             | 190.20                | 196.16     | 213.70     | 1.56            | -0.0096 | -0.02 | -0.02 |
| 2.56             | 191.13                | 199.41     | 219.49     | 2.56            | -0.0048 | -0.01 | 0.01  |
| 3.56             | 190.14                | 198.09     | 216.04     | 3.56            | -0.0099 | -0.01 | 0.00  |
| 4.56             | 194.32                | 200.10     | 219.81     | 4.56            | 0.0118  | 0.00  | 0.01  |
| 5.56             | 193.15                | 195.97     | 219.84     | 5.56            | 0.0057  | -0.02 | 0.01  |
| 6.56             | 192.13                | 201.74     | 219.24     | 6.56            | 0.0004  | 0.00  | 0.01  |
| 7.56             | 191.04                | 200.88     | 217.43     | 7.56            | -0.0052 | 0.00  | 0.00  |
| 8.56             | 192.92                | 203.18     | 217.20     | 8.56            | 0.0046  | 0.01  | 0.00  |
| 9.56             | 192.75                | 200.93     | 215.34     | 9.56            | 0.0037  | 0.00  | -0.01 |
| 10.56            | 192.12                | 204.64     | 220.22     | 10.56           | 0.0004  | 0.02  | 0.01  |
| 11.56            | 193.93                | 202.72     | 216.40     | 11.56           | 0.0098  | 0.01  | 0.00  |
| 12.56            | 195.51                | 203.88     | 215.05     | 12.56           | 0.0180  | 0.01  | -0.01 |
| 13.56            | 190.86                | 199.74     | 219.65     | 13.56           | -0.0062 | -0.01 | 0.01  |
| 14.56            | 193.82                | 201.16     | 219.15     | 14.56           | 0.0092  | 0.00  | 0.01  |
| 15.56            | 192.52                | 201.21     | 218.99     | 15.56           | 0.0025  | 0.00  | 0.01  |
| 16.58            | 194.31                | 206.65     | 218.19     | 16.58           | 0.0118  | 0.03  | 0.01  |
| 17.58            | 191.90                | 203.92     | 215.28     | 17.58           | -0.0008 | 0.01  | -0.01 |
| 18.58            | 192.90                | 205.62     | 218.20     | 18.58           | 0.0044  | 0.02  | 0.01  |
| 19.58            | 194.29                | 205.03     | 219.21     | 19.58           | 0.0117  | 0.02  | 0.01  |
| 20.58            | 193.33                | 199.23     | 213.79     | 20.58           | 0.0067  | -0.01 | -0.02 |
| 21.58            | 195.08                | 205.93     | 220.14     | 21.58           | 0.0158  | 0.02  | 0.01  |
| 22.58            | 191.41                | 200.02     | 214.46     | 22.58           | -0.0033 | 0.00  | -0.01 |
| 23.58            | 193.68                | 200.48     | 218.31     | 23.58           | 0.0085  | 0.00  | 0.01  |
| 24.58            | 194.37                | 202.04     | 216.78     | 24.58           | 0.0121  | 0.01  | 0.00  |
| 25.58            | 193.72                | 204.60     | 224.53     | 25.58           | 0.0087  | 0.02  | 0.03  |
| 26.58            | 193.15                | 202.50     | 218.40     | 26.58           | 0.0057  | 0.01  | 0.01  |
| 27.58            | 196.96                | 205.68     | 225.72     | 27.58           | 0.0256  | 0.02  | 0.04  |
| 28.56            | 196.41                | 206.18     | 222.70     | 28.56           | 0.0227  | 0.03  | 0.03  |
| 29.61            | 197.63                | 214.07     | 232.14     | 29.61           | 0.0291  | 0.07  | 0.07  |
| 30.56            | 197.37                | 214.73     | 233.73     | 30.56           | 0.0277  | 0.07  | 0.08  |
| 31.63            | 200.16                | 216.06     | 239.54     | 31.63           | 0.0423  | 0.08  | 0.10  |
| 32.63            | 205.21                | 226.00     | 248.35     | 32.63           | 0.0685  | 0.12  | 0.14  |
| 33.63            | 205.44                | 229.69     | 255.68     | 33.63           | 0.0697  | 0.14  | 0.18  |
| 34.63            | 208.58                | 235.80     | 258.39     | 34.63           | 0.0861  | 0.17  | 0.19  |
| 35.63            | 214.48                | 243.72     | 267.89     | 35.63           | 0.1168  | 0.21  | 0.23  |
| 36.63            | 217.09                | 254.31     | 275.44     | 36.63           | 0.1304  | 0.27  | 0.27  |
| 37.65            | 221.27                | 258.58     | 281.49     | 37.65           | 0.1522  | 0.29  | 0.30  |
| 38.65            | 226.15                | 267.06     | 289.00     | 38.65           | 0.1776  | 0.33  | 0.33  |
| 39.65            | 234.73                | 270.26     | 292.79     | 39.65           | 0.2223  | 0.34  | 0.35  |
| <b>Parameter</b> |                       |            |            |                 |         |       |       |
| a                | 134.083800            | 88.231000  | 88.465500  |                 |         |       |       |
| b                | 4.369000              | 2.909300   | 2.854600   |                 |         |       |       |
| x0               | 43.108700             | 35.687900  | 34.670500  |                 |         |       |       |
| y0               | 192.045900            | 200.981800 | 217.047300 |                 |         |       |       |
| R                | 0.986443              | 0.990521   | 0.994262   |                 |         |       |       |

CP<sub>(SDM)</sub>      37.35      31.86      30.91

| Well /<br>Cycle           | Raw fluorescence data |            |            | Well /<br>Cycle | E5      | E6    | E7    |
|---------------------------|-----------------------|------------|------------|-----------------|---------|-------|-------|
|                           | E5                    | E6         | E7         |                 |         |       |       |
| 0.56                      | 118.55                | 112.65     | 103.62     | 0.56            | 0.0055  | -0.02 | 0.01  |
| 1.56                      | 116.56                | 115.68     | 101.83     | 1.56            | -0.0114 | 0.00  | -0.01 |
| 2.56                      | 114.14                | 116.30     | 102.35     | 2.56            | -0.0319 | 0.01  | 0.00  |
| 3.56                      | 115.77                | 116.34     | 102.39     | 3.56            | -0.0181 | 0.01  | 0.00  |
| 4.56                      | 116.41                | 115.87     | 102.48     | 4.56            | -0.0127 | 0.00  | 0.00  |
| 5.56                      | 117.67                | 114.82     | 103.20     | 5.56            | -0.0020 | -0.01 | 0.01  |
| 6.56                      | 120.17                | 115.27     | 103.84     | 6.56            | 0.0192  | 0.00  | 0.01  |
| 7.56                      | 117.97                | 117.56     | 104.38     | 7.56            | 0.0005  | 0.02  | 0.02  |
| 8.56                      | 118.14                | 117.17     | 104.43     | 8.56            | 0.0020  | 0.01  | 0.02  |
| 9.56                      | 117.39                | 117.28     | 104.09     | 9.56            | -0.0044 | 0.02  | 0.02  |
| 10.56                     | 120.86                | 118.13     | 103.55     | 10.56           | 0.0251  | 0.02  | 0.01  |
| 11.56                     | 119.92                | 117.84     | 104.01     | 11.56           | 0.0171  | 0.02  | 0.02  |
| 12.56                     | 119.78                | 118.94     | 104.01     | 12.56           | 0.0159  | 0.03  | 0.02  |
| 13.56                     | 120.52                | 117.05     | 103.18     | 13.56           | 0.0222  | 0.01  | 0.01  |
| 14.56                     | 119.90                | 119.36     | 103.99     | 14.56           | 0.0169  | 0.03  | 0.02  |
| 15.56                     | 119.68                | 119.10     | 104.92     | 15.56           | 0.0150  | 0.03  | 0.02  |
| 16.58                     | 120.47                | 118.07     | 104.71     | 16.58           | 0.0217  | 0.02  | 0.02  |
| 17.58                     | 121.71                | 119.14     | 104.91     | 17.58           | 0.0323  | 0.03  | 0.02  |
| 18.58                     | 120.67                | 117.15     | 104.49     | 18.58           | 0.0234  | 0.01  | 0.02  |
| 19.58                     | 120.93                | 116.21     | 104.18     | 19.58           | 0.0256  | 0.01  | 0.02  |
| 20.58                     | 122.92                | 120.21     | 105.30     | 20.58           | 0.0425  | 0.04  | 0.03  |
| 21.58                     | 124.38                | 118.55     | 105.83     | 21.58           | 0.0549  | 0.03  | 0.03  |
| 22.58                     | 123.62                | 120.24     | 106.91     | 22.58           | 0.0485  | 0.04  | 0.04  |
| 23.58                     | 126.80                | 120.15     | 108.37     | 23.58           | 0.0754  | 0.04  | 0.06  |
| 24.58                     | 133.06                | 124.12     | 110.75     | 24.58           | 0.1285  | 0.07  | 0.08  |
| 25.58                     | 136.82                | 132.64     | 116.55     | 25.58           | 0.1604  | 0.15  | 0.14  |
| 26.58                     | 150.13                | 146.71     | 128.00     | 26.58           | 0.2733  | 0.27  | 0.25  |
| 27.58                     | 167.40                | 165.49     | 143.20     | 27.58           | 0.4198  | 0.43  | 0.40  |
| 28.56                     | 199.20                | 198.96     | 172.06     | 28.56           | 0.6895  | 0.72  | 0.68  |
| 29.61                     | 238.57                | 240.27     | 204.21     | 29.61           | 1.0234  | 1.08  | 0.99  |
| 30.56                     | 293.66                | 288.51     | 246.78     | 30.56           | 1.4906  | 1.50  | 1.41  |
| 31.63                     | 340.11                | 335.18     | 288.48     | 31.63           | 1.8846  | 1.90  | 1.82  |
| 32.63                     | 383.91                | 380.86     | 325.77     | 32.63           | 2.2561  | 2.30  | 2.18  |
| 33.63                     | 440.57                | 440.99     | 372.60     | 33.63           | 2.7366  | 2.82  | 2.64  |
| 34.63                     | 478.53                | 472.62     | 405.43     | 34.63           | 3.0586  | 3.09  | 2.96  |
| 35.63                     | 518.12                | 500.80     | 423.17     | 35.63           | 3.3943  | 3.34  | 3.13  |
| 36.63                     | 536.71                | 527.61     | 452.10     | 36.63           | 3.5520  | 3.57  | 3.41  |
| 37.65                     | 558.69                | 552.13     | 469.96     | 37.65           | 3.7384  | 3.78  | 3.59  |
| 38.65                     | 582.22                | 565.58     | 486.82     | 38.65           | 3.9380  | 3.90  | 3.75  |
| 39.65                     | 595.76                | 584.24     | 504.11     | 39.65           | 4.0528  | 4.06  | 3.92  |
| <b>Parameter</b>          |                       |            |            |                 |         |       |       |
| <b>a</b>                  | 485.580000            | 471.534000 | 403.567700 |                 |         |       |       |
| <b>b</b>                  | 2.264800              | 2.222500   | 2.264800   |                 |         |       |       |
| <b>x0</b>                 | 32.119000             | 31.990900  | 32.114000  |                 |         |       |       |
| <b>y0</b>                 | 117.906200            | 115.520700 | 102.440900 |                 |         |       |       |
| <b>R</b>                  | 0.999647              | 0.999564   | 0.999487   |                 |         |       |       |
| <b>CP<sub>(SDM)</sub></b> | 29.14                 | 29.06      | 29.13      |                 |         |       |       |

| E5              |                                |                                | E6              |                                |
|-----------------|--------------------------------|--------------------------------|-----------------|--------------------------------|
| Well /<br>Cycle | FAM Normalized<br>Fluorescence | HEX Normalized<br>Fluorescence | Well /<br>Cycle | FAM Normalized<br>Fluorescence |
| 0.56            | -0.036272058                   | 0.005460273                    | 0.56            | -0.039365754                   |
| 1.56            | -0.009611765                   | -0.011417551                   | 1.56            | -0.023991227                   |
| 2.56            | -0.004769172                   | -0.031942341                   | 2.56            | -0.007820609                   |
| 3.56            | -0.00992419                    | -0.018117792                   | 3.56            | -0.014388368                   |
| 4.56            | 0.01184144                     | -0.012689748                   | 4.56            | -0.004387462                   |
| 5.56            | 0.005749146                    | -0.002003287                   | 5.56            | -0.024936586                   |
| 6.56            | 0.000437916                    | 0.019200008                    | 6.56            | 0.003772481                    |
| 7.56            | -0.00523781                    | 0.000541108                    | 7.56            | -0.000506514                   |
| 8.56            | 0.004551516                    | 0.001982932                    | 8.56            | 0.010937309                    |
| 9.56            | 0.003666311                    | -0.004378056                   | 9.56            | -0.000257735                   |
| 10.56           | 0.000385845                    | 0.025052118                    | 10.56           | 0.018201648                    |
| 11.56           | 0.009810675                    | 0.017079679                    | 11.56           | 0.008648544                    |
| 12.56           | 0.018037875                    | 0.015892294                    | 12.56           | 0.014420211                    |
| 13.56           | -0.006175086                   | 0.02216847                     | 13.56           | -0.006178669                   |
| 14.56           | 0.009237896                    | 0.016910052                    | 14.56           | 0.000886647                    |
| 15.56           | 0.002468681                    | 0.015044162                    | 15.56           | 0.001135426                    |
| 16.58           | 0.011789369                    | 0.021744404                    | 16.58           | 0.028202554                    |
| 17.58           | -0.000759714                   | 0.032261238                    | 17.58           | 0.014619234                    |
| 18.58           | 0.004447374                    | 0.023440667                    | 18.58           | 0.023077712                    |
| 19.58           | 0.011685227                    | 0.02564581                     | 19.58           | 0.020142122                    |
| 20.58           | 0.006686422                    | 0.042523633                    | 20.58           | -0.008716212                   |
| 21.58           | 0.015798827                    | 0.054906358                    | 21.58           | 0.02462014                     |
| 22.58           | -0.003311188                   | 0.048460556                    | 22.58           | -0.004785508                   |
| 23.58           | 0.008508903                    | 0.075431148                    | 23.58           | -0.002496743                   |
| 24.58           | 0.012101794                    | 0.1285242                      | 24.58           | 0.005265153                    |
| 25.58           | 0.008717187                    | 0.160413956                    | 25.58           | 0.018002625                    |
| 26.58           | 0.005749146                    | 0.273300301                    | 26.58           | 0.007553918                    |
| 27.58           | 0.025588154                    | 0.419772667                    | 27.58           | 0.023376246                    |
| 28.56           | 0.022724255                    | 0.689478586                    | 28.56           | 0.025864033                    |
| 29.61           | 0.029076903                    | 1.023388083                    | 29.61           | 0.065121319                    |
| 30.56           | 0.02772306                     | 1.490623903                    | 30.56           | 0.068405199                    |
| 31.63           | 0.042250837                    | 1.884581133                    | 31.63           | 0.075022713                    |
| 32.63           | 0.068546634                    | 2.25606287                     | 32.63           | 0.124479928                    |
| 33.63           | 0.069744264                    | 2.73661436                     | 33.63           | 0.142839799                    |
| 34.63           | 0.086094522                    | 3.058565198                    | 34.63           | 0.173240562                    |
| 35.63           | 0.116816344                    | 3.394340586                    | 35.63           | 0.212647115                    |
| 36.63           | 0.130406845                    | 3.552008291                    | 36.63           | 0.265338454                    |
| 37.65           | 0.152172475                    | 3.738427665                    | 37.65           | 0.286584158                    |
| 38.65           | 0.177583067                    | 3.937993083                    | 38.65           | 0.328777034                    |
| 39.65           | 0.22259887                     | 4.052830131                    | 39.65           | 0.344698873                    |

| Experiment derived linear regression |            |
|--------------------------------------|------------|
| parameter                            | value      |
| y0                                   | 0.0179     |
| a                                    | 0.0105     |
| R                                    | 0.82758174 |

| Experiment derived linear regression |            |
|--------------------------------------|------------|
| parameter                            | value      |
| y0                                   | 0.0078     |
| a                                    | 0.0388     |
| R                                    | 0.91826165 |

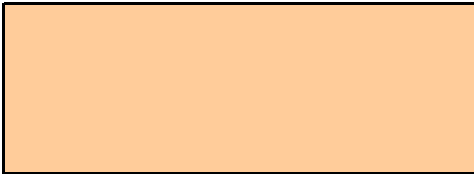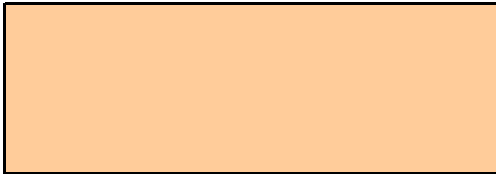

| E7                          |              |                             |                             |
|-----------------------------|--------------|-----------------------------|-----------------------------|
| HEX Normalized Fluorescence | Well / Cycle | FAM Normalized Fluorescence | HEX Normalized Fluorescence |
| -0.024850092                | 0.56         | -0.027447013                | 0.011510051                 |
| 0.001378974                 | 1.56         | -0.015421984                | -0.005963438                |
| 0.006745977                 | 2.56         | 0.011254229                 | -0.000887341                |
| 0.007092235                 | 3.56         | -0.004640924                | -0.000496872                |
| 0.003023701                 | 4.56         | 0.012728562                 | 0.000381683                 |
| -0.00606558                 | 5.56         | 0.012866781                 | 0.007410126                 |
| -0.002170174                | 6.56         | 0.010102406                 | 0.013657631                 |
| 0.017653113                 | 7.56         | 0.00176321                  | 0.018928963                 |
| 0.014277095                 | 8.56         | 0.000703533                 | 0.019417049                 |
| 0.015229305                 | 9.56         | -0.007866027                | 0.016098062                 |
| 0.022587294                 | 10.56        | 0.014617551                 | 0.01082673                  |
| 0.020076921                 | 11.56        | -0.002982299                | 0.015317124                 |
| 0.029599024                 | 12.56        | -0.009202142                | 0.015317124                 |
| 0.01323832                  | 13.56        | 0.011991395                 | 0.007214892                 |
| 0.033234736                 | 14.56        | 0.00968775                  | 0.01512189                  |
| 0.030984057                 | 15.56        | 0.008950584                 | 0.024200295                 |
| 0.022067906                 | 16.56        | 0.005264751                 | 0.022150333                 |
| 0.031330316                 | 17.56        | -0.008142465                | 0.024102678                 |
| 0.014103966                 | 18.56        | 0.005310824                 | 0.020002753                 |
| 0.005966896                 | 19.56        | 0.009964188                 | 0.016976618                 |
| 0.040592725                 | 20.56        | -0.015007328                | 0.027909751                 |
| 0.026223006                 | 21.56        | 0.014248968                 | 0.033083466                 |
| 0.040852419                 | 22.56        | -0.011920443                | 0.04362613                  |
| 0.040073338                 | 23.56        | 0.005817626                 | 0.05787825                  |
| 0.074439473                 | 24.56        | -0.001231529                | 0.081111158                 |
| 0.148192488                 | 25.56        | 0.034474974                 | 0.137729169                 |
| 0.269988842                 | 26.56        | 0.006232282                 | 0.249500932                 |
| 0.432557109                 | 27.56        | 0.03995765                  | 0.397879167                 |
| 0.722288733                 | 28.56        | 0.026043632                 | 0.679602581                 |
| 1.079886981                 | 29.56        | 0.069536456                 | 0.993442072                 |
| 1.497474479                 | 30.56        | 0.076862048                 | 1.40899875                  |
| 1.901471338                 | 31.56        | 0.103630407                 | 1.816062725                 |
| 2.296898305                 | 32.56        | 0.144220638                 | 2.180077489                 |
| 2.817411079                 | 33.56        | 0.177992078                 | 2.637219119                 |
| 3.091214821                 | 34.56        | 0.190477836                 | 2.957696584                 |
| 3.335153786                 | 35.56        | 0.234247097                 | 3.130869604                 |
| 3.567233405                 | 36.56        | 0.269032142                 | 3.413276338                 |
| 3.779489736                 | 37.56        | 0.29690625                  | 3.587620765                 |
| 3.895919086                 | 38.56        | 0.331507003                 | 3.752203466                 |
| 4.057448578                 | 39.56        | 0.348968635                 | 3.920983709                 |

**Experiment derived linear regression**

| parameter | value      |
|-----------|------------|
| y0        | 0.0099     |
| a         | 0.0503     |
| R         | 0.92575888 |

| AVERAGE | value       |
|---------|-------------|
| y0      | 0.011866667 |
| a       | 0.0332      |
