# Supplementary material for: Quantify single nucleotide polymorphism (SNP) ratio in pooled DNA based on normalized fluorescence real-time PCR
Source: PubMed Central journal article supplement (PMC1552069; doi:10.1186/1471-2164-7-143), 2006-06-09
Supplement: 1471-2164-7-143-S2.pdf [file 1471-2164-7-143-S2.pdf]

| Well /<br>Cycle           | Raw fluorescence data |            |            |            | Well /<br>Cycle | A7      | A8    | A9    | B2    |
|---------------------------|-----------------------|------------|------------|------------|-----------------|---------|-------|-------|-------|
|                           | A7                    | A8         | A9         | B2         |                 |         |       |       |       |
| 0.56                      | 175.18                | 154.04     | 165.20     | 146.22     | 0.56            | -0.0715 | -0.08 | -0.08 | -0.03 |
| 1.56                      | 180.55                | 162.86     | 167.08     | 148.78     | 1.56            | -0.0431 | -0.03 | -0.07 | -0.01 |
| 2.56                      | 187.15                | 160.67     | 173.58     | 152.21     | 2.56            | -0.0081 | -0.04 | -0.03 | 0.01  |
| 3.56                      | 185.63                | 161.94     | 175.26     | 149.66     | 3.56            | -0.0162 | -0.03 | -0.02 | 0.00  |
| 4.56                      | 191.35                | 164.88     | 177.39     | 151.00     | 4.56            | 0.0142  | -0.02 | -0.01 | 0.01  |
| 5.56                      | 185.42                | 166.32     | 177.89     | 152.11     | 5.56            | -0.0173 | -0.01 | -0.01 | 0.01  |
| 6.56                      | 192.56                | 169.05     | 178.63     | 151.42     | 6.56            | 0.0206  | 0.01  | -0.01 | 0.01  |
| 7.56                      | 191.28                | 167.48     | 179.90     | 150.17     | 7.56            | 0.0138  | 0.00  | 0.00  | 0.00  |
| 8.56                      | 195.24                | 169.30     | 179.28     | 152.45     | 8.56            | 0.0348  | 0.01  | 0.00  | 0.02  |
| 9.56                      | 191.05                | 169.20     | 181.29     | 151.80     | 9.56            | 0.0126  | 0.01  | 0.01  | 0.01  |
| 10.56                     | 193.92                | 172.19     | 184.34     | 152.97     | 10.56           | 0.0278  | 0.03  | 0.03  | 0.02  |
| 11.56                     | 193.81                | 169.17     | 182.93     | 151.38     | 11.56           | 0.0272  | 0.01  | 0.02  | 0.01  |
| 12.56                     | 192.21                | 168.79     | 185.63     | 152.70     | 12.56           | 0.0187  | 0.01  | 0.03  | 0.02  |
| 13.56                     | 190.37                | 165.97     | 180.94     | 152.59     | 13.56           | 0.0090  | -0.01 | 0.01  | 0.02  |
| 14.56                     | 193.72                | 172.65     | 185.34     | 153.10     | 14.56           | 0.0267  | 0.03  | 0.03  | 0.02  |
| 15.56                     | 190.91                | 174.68     | 185.00     | 150.94     | 15.56           | 0.0118  | 0.04  | 0.03  | 0.01  |
| 16.58                     | 191.51                | 172.14     | 188.18     | 151.10     | 16.58           | 0.0150  | 0.03  | 0.05  | 0.01  |
| 17.58                     | 194.22                | 173.82     | 184.55     | 149.10     | 17.58           | 0.0294  | 0.04  | 0.03  | -0.01 |
| 18.58                     | 193.02                | 174.01     | 188.26     | 154.42     | 18.58           | 0.0230  | 0.04  | 0.05  | 0.03  |
| 19.58                     | 190.24                | 175.12     | 185.16     | 149.77     | 19.58           | 0.0083  | 0.05  | 0.03  | 0.00  |
| 20.58                     | 193.94                | 174.47     | 183.27     | 153.07     | 20.58           | 0.0279  | 0.04  | 0.02  | 0.02  |
| 21.58                     | 191.95                | 172.51     | 182.94     | 149.16     | 21.58           | 0.0173  | 0.03  | 0.02  | -0.01 |
| 22.58                     | 192.87                | 173.43     | 191.49     | 150.94     | 22.58           | 0.0222  | 0.04  | 0.07  | 0.01  |
| 23.58                     | 188.83                | 172.75     | 188.28     | 149.58     | 23.58           | 0.0008  | 0.03  | 0.05  | 0.00  |
| 24.58                     | 194.28                | 177.32     | 193.29     | 153.13     | 24.58           | 0.0297  | 0.06  | 0.08  | 0.02  |
| 25.58                     | 191.89                | 174.96     | 187.19     | 152.07     | 25.58           | 0.0170  | 0.04  | 0.04  | 0.01  |
| 26.58                     | 204.70                | 183.03     | 200.53     | 155.68     | 26.58           | 0.0849  | 0.09  | 0.12  | 0.04  |
| 27.58                     | 209.56                | 190.39     | 203.39     | 161.05     | 27.58           | 0.1107  | 0.14  | 0.13  | 0.07  |
| 28.56                     | 227.95                | 208.22     | 226.79     | 174.12     | 28.56           | 0.2081  | 0.24  | 0.26  | 0.16  |
| 29.61                     | 251.54                | 225.14     | 243.86     | 184.59     | 29.61           | 0.3332  | 0.34  | 0.36  | 0.23  |
| 30.56                     | 282.57                | 253.18     | 278.01     | 204.41     | 30.56           | 0.4976  | 0.51  | 0.55  | 0.36  |
| 31.63                     | 310.58                | 271.81     | 302.05     | 215.32     | 31.63           | 0.6461  | 0.62  | 0.68  | 0.43  |
| 32.63                     | 354.06                | 308.38     | 341.26     | 243.90     | 32.63           | 0.8765  | 0.84  | 0.90  | 0.62  |
| 33.63                     | 379.22                | 331.44     | 363.20     | 256.30     | 33.63           | 1.0099  | 0.98  | 1.02  | 0.71  |
| 34.63                     | 412.38                | 359.02     | 393.22     | 274.46     | 34.63           | 1.1856  | 1.14  | 1.19  | 0.83  |
| 35.63                     | 452.41                | 384.14     | 426.39     | 296.48     | 35.63           | 1.3978  | 1.29  | 1.37  | 0.97  |
| 36.63                     | 475.35                | 404.27     | 443.21     | 318.11     | 36.63           | 1.5193  | 1.41  | 1.47  | 1.12  |
| 37.65                     | 507.67                | 429.80     | 469.64     | 333.19     | 37.65           | 1.6906  | 1.57  | 1.62  | 1.22  |
| 38.65                     | 525.19                | 444.60     | 489.01     | 345.32     | 38.65           | 1.7835  | 1.65  | 1.72  | 1.30  |
| 39.65                     | 545.32                | 461.71     | 506.71     | 359.48     | 39.65           | 1.8902  | 1.76  | 1.82  | 1.39  |
| <b>Parameter</b>          |                       |            |            |            |                 |         |       |       |       |
| <b>a</b>                  | 378.609800            | 315.128600 | 348.626200 | 225.954100 |                 |         |       |       |       |
| <b>b</b>                  | 2.443600              | 2.607400   | 2.614400   | 2.519300   |                 |         |       |       |       |
| <b>x0</b>                 | 33.557600             | 33.447500  | 33.314200  | 33.909800  |                 |         |       |       |       |
| <b>y0</b>                 | 188.679700            | 167.557400 | 179.587500 | 150.126500 |                 |         |       |       |       |
| <b>R</b>                  | 0.998780              | 0.998642   | 0.998388   | 0.998671   |                 |         |       |       |       |
| <b>CP<sub>(SDM)</sub></b> | 30.34                 | 30.01      | 29.87      | 30.59      |                 |         |       |       |       |

| Well /<br>Cycle           |        |        |        |        | Fluorescence Data Normalized To Y0 |       |       |       |       |
|---------------------------|--------|--------|--------|--------|------------------------------------|-------|-------|-------|-------|
|                           | A7     | A8     | A9     | B2     | Well /<br>Cycle                    | A7    | A8    | A9    | B2    |
| 0.56                      | 93.56  | 92.33  | 83.65  | 82.17  | 0.56                               | -0.06 | -0.07 | -0.08 | -0.01 |
| 1.56                      | 97.81  | 95.56  | 87.69  | 82.8   | 1.56                               | -0.01 | -0.04 | -0.04 | 0.00  |
| 2.56                      | 96.9   | 95.93  | 86.4   | 82.3   | 2.56                               | -0.02 | -0.03 | -0.05 | -0.01 |
| 3.56                      | 99.47  | 100.12 | 88.03  | 83.11  | 3.56                               | 0.00  | 0.01  | -0.03 | 0.00  |
| 4.56                      | 98.39  | 97.62  | 89.17  | 83.18  | 4.56                               | -0.01 | -0.02 | -0.02 | 0.00  |
| 5.56                      | 99.66  | 98.29  | 90.79  | 83.79  | 5.56                               | 0.01  | -0.01 | 0.00  | 0.01  |
| 6.56                      | 99.55  | 98.16  | 90.76  | 83.63  | 6.56                               | 0.01  | -0.01 | 0.00  | 0.01  |
| 7.56                      | 99.09  | 99.46  | 91.24  | 83.88  | 7.56                               | 0.00  | 0.00  | 0.00  | 0.01  |
| 8.56                      | 100.34 | 98.92  | 91.12  | 83.24  | 8.56                               | 0.01  | 0.00  | 0.00  | 0.00  |
| 9.56                      | 99.04  | 101.53 | 91.56  | 84.14  | 9.56                               | 0.00  | 0.02  | 0.01  | 0.01  |
| 10.56                     | 102.19 | 100.09 | 91.94  | 83.92  | 10.56                              | 0.03  | 0.01  | 0.01  | 0.01  |
| 11.56                     | 99.66  | 100.66 | 92.24  | 83.22  | 11.56                              | 0.01  | 0.01  | 0.01  | 0.00  |
| 12.56                     | 99.44  | 101.25 | 93.81  | 84.33  | 12.56                              | 0.00  | 0.02  | 0.03  | 0.01  |
| 13.56                     | 100.23 | 101.05 | 94.73  | 83.17  | 13.56                              | 0.01  | 0.02  | 0.04  | 0.00  |
| 14.56                     | 98.8   | 98.76  | 94.41  | 83.42  | 14.56                              | 0.00  | -0.01 | 0.04  | 0.00  |
| 15.56                     | 100.21 | 103.44 | 92.41  | 83.39  | 15.56                              | 0.01  | 0.04  | 0.02  | 0.00  |
| 16.58                     | 99.99  | 101.75 | 91.54  | 83.44  | 16.58                              | 0.01  | 0.02  | 0.01  | 0.00  |
| 17.58                     | 100.41 | 102.2  | 92.68  | 82.09  | 17.58                              | 0.01  | 0.03  | 0.02  | -0.01 |
| 18.58                     | 99.18  | 103.18 | 94.87  | 83.41  | 18.58                              | 0.00  | 0.04  | 0.04  | 0.00  |
| 19.58                     | 100.25 | 102.53 | 91.66  | 82.99  | 19.58                              | 0.01  | 0.03  | 0.01  | 0.00  |
| 20.58                     | 98.93  | 103.52 | 95.23  | 82.83  | 20.58                              | 0.00  | 0.04  | 0.05  | 0.00  |
| 21.58                     | 101.02 | 102.89 | 95.03  | 83.48  | 21.58                              | 0.02  | 0.04  | 0.04  | 0.00  |
| 22.58                     | 101.58 | 102.68 | 96.94  | 82.27  | 22.58                              | 0.03  | 0.03  | 0.07  | -0.01 |
| 23.58                     | 101.98 | 104.43 | 93.09  | 83.38  | 23.58                              | 0.03  | 0.05  | 0.02  | 0.00  |
| 24.58                     | 101.51 | 104.12 | 94.98  | 83.85  | 24.58                              | 0.02  | 0.05  | 0.04  | 0.01  |
| 25.58                     | 103.74 | 104.39 | 97.96  | 84.92  | 25.58                              | 0.05  | 0.05  | 0.08  | 0.02  |
| 26.58                     | 103.6  | 107.69 | 97.12  | 85.58  | 26.58                              | 0.05  | 0.08  | 0.07  | 0.03  |
| 27.58                     | 106.34 | 107.69 | 101.24 | 86.6   | 27.58                              | 0.07  | 0.08  | 0.11  | 0.04  |
| 28.56                     | 110.15 | 112.14 | 103.52 | 87.74  | 28.56                              | 0.11  | 0.13  | 0.14  | 0.06  |
| 29.61                     | 114.39 | 115.41 | 109.11 | 90.18  | 29.61                              | 0.15  | 0.16  | 0.20  | 0.09  |
| 30.56                     | 118.9  | 119.71 | 110.63 | 93.08  | 30.56                              | 0.20  | 0.21  | 0.22  | 0.12  |
| 31.63                     | 125.08 | 125.19 | 117.09 | 98.46  | 31.63                              | 0.26  | 0.26  | 0.29  | 0.18  |
| 32.63                     | 132.51 | 131.5  | 125.73 | 101.45 | 32.63                              | 0.34  | 0.32  | 0.38  | 0.22  |
| 33.63                     | 141.76 | 140.46 | 135.3  | 107.2  | 33.63                              | 0.43  | 0.41  | 0.49  | 0.29  |
| 34.63                     | 152.08 | 147.5  | 145.4  | 112.76 | 34.63                              | 0.54  | 0.48  | 0.60  | 0.36  |
| 35.63                     | 157.53 | 151.62 | 151.12 | 116.65 | 35.63                              | 0.59  | 0.53  | 0.66  | 0.40  |
| 36.63                     | 167.8  | 160.21 | 157.2  | 119.89 | 36.63                              | 0.69  | 0.61  | 0.73  | 0.44  |
| 37.65                     | 179.86 | 167.06 | 170.69 | 123.53 | 37.65                              | 0.82  | 0.68  | 0.88  | 0.49  |
| 38.65                     | 188.67 | 175.28 | 177.08 | 126.44 | 38.65                              | 0.90  | 0.76  | 0.95  | 0.52  |
| 39.65                     | 193.48 | 182.66 | 186.44 | 131.93 | 39.65                              | 0.95  | 0.84  | 1.05  | 0.59  |
| <b>Parameter</b>          |        |        |        |        |                                    |       |       |       |       |
| <b>a</b>                  | 120.27 | 117.12 | 130.7  | 51.865 |                                    |       |       |       |       |
| <b>b</b>                  | 3.0633 | 3.7963 | 3.5324 | 2.533  |                                    |       |       |       |       |
| <b>x0</b>                 | 35.561 | 36.303 | 36.204 | 34.098 |                                    |       |       |       |       |
| <b>y0</b>                 | 99.043 | 99.339 | 90.955 | 83.098 |                                    |       |       |       |       |
| <b>R</b>                  | 0.9987 | 0.9964 | 0.9964 | 0.9986 |                                    |       |       |       |       |
| <b>CP<sub>(SDM)</sub></b> | 31.53  | 31.30  | 31.55  | 30.76  |                                    |       |       |       |       |

| A8           |                             |                             | A9           |                             |                             |
|--------------|-----------------------------|-----------------------------|--------------|-----------------------------|-----------------------------|
| Well / Cycle | FAM Normalized Fluorescence | VIC Normalized Fluorescence | Well / Cycle | FAM Normalized Fluorescence | VIC Normalized Fluorescence |
| 0. 56        | -0. 08067325                | -0. 070554506               | 0. 56        | -0. 08011415                | -0. 080314441               |
| 1. 56        | -0. 028034572               | -0. 038039517               | 1. 56        | -0. 069645716               | -0. 035896872               |
| 2. 56        | -0. 04110472                | -0. 03431489                | 2. 56        | -0. 03345166                | -0. 05007971                |
| 3. 56        | -0. 033525228               | 0. 007863997                | 3. 56        | -0. 024096889               | -0. 03215876                |
| 4. 56        | -0. 015979002               | -0. 017302403               | 4. 56        | -0. 012236375               | -0. 019625089               |
| 5. 56        | -0. 007384932               | -0. 010557808               | 5. 56        | -0. 009452217               | -0. 001814084               |
| 6. 56        | 0. 008907992                | -0. 011866461               | 6. 56        | -0. 005331663               | -0. 002143917               |
| 7. 56        | -0. 000461931               | 0. 001220067                | 7. 56        | 0. 001740099                | 0. 003133418                |
| 8. 56        | 0. 010400018                | -0. 004215875               | 8. 56        | -0. 001712257               | 0. 001814084                |
| 9. 56        | 0. 009803208                | 0. 022057846                | 9. 56        | 0. 009480058                | 0. 006651641                |
| 10. 56       | 0. 027647839                | 0. 007562                   | 10. 56       | 0. 026463423                | 0. 010829531                |
| 11. 56       | 0. 009624165                | 0. 013299939                | 11. 56       | 0. 018612097                | 0. 014127865                |
| 12. 56       | 0. 007356285                | 0. 01923921                 | 12. 56       | 0. 033646551                | 0. 031389148                |
| 13. 56       | -0. 009473768               | 0. 017225898                | 13. 56       | 0. 007531148                | 0. 04150404                 |
| 14. 56       | 0. 030393167                | -0. 005826525               | 14. 56       | 0. 032031739                | 0. 037985817                |
| 15. 56       | 0. 042508418                | 0. 041284976                | 15. 56       | 0. 030138512                | 0. 015996922                |
| 16. 58       | 0. 027349434                | 0. 02427249                 | 16. 58       | 0. 047845758                | 0. 006431752                |
| 17. 58       | 0. 037375849                | 0. 028802442                | 17. 58       | 0. 02763277                 | 0. 018965422                |
| 18. 58       | 0. 038509788                | 0. 038667671                | 18. 58       | 0. 048291223                | 0. 043043263                |
| 19. 58       | 0. 045134384                | 0. 032124407                | 19. 58       | 0. 031029442                | 0. 007751086                |
| 20. 58       | 0. 041255116                | 0. 042090301                | 20. 58       | 0. 020505325                | 0. 047001264                |
| 21. 58       | 0. 029557632                | 0. 035748368                | 21. 58       | 0. 01866778                 | 0. 044802375                |
| 22. 58       | 0. 035048288                | 0. 033634391                | 22. 58       | 0. 066276885                | 0. 06580177                 |
| 23. 58       | 0. 030989977                | 0. 051250871                | 23. 58       | 0. 048402589                | 0. 023473146                |
| 24. 58       | 0. 058264213                | 0. 048130237                | 24. 58       | 0. 076299854                | 0. 044252652                |
| 25. 58       | 0. 044179487                | 0. 050848208                | 25. 58       | 0. 042333125                | 0. 077016107                |
| 26. 58       | 0. 092342087                | 0. 084067857                | 26. 58       | 0. 116614464                | 0. 067780771                |
| 27. 58       | 0. 136267333                | 0. 084067857                | 27. 58       | 0. 132539848                | 0. 113077896                |
| 28. 56       | 0. 242678628                | 0. 128864049                | 28. 56       | 0. 262838449                | 0. 138145237                |
| 29. 61       | 0. 343658949                | 0. 161781701                | 29. 61       | 0. 357889608                | 0. 1996042                  |
| 30. 56       | 0. 511004587                | 0. 205067909                | 30. 56       | 0. 548047609                | 0. 216315761                |
| 31. 63       | 0. 622190366                | 0. 260232658                | 31. 63       | 0. 681909932                | 0. 287339893                |
| 32. 63       | 0. 840443931                | 0. 323752653                | 32. 63       | 0. 900243614                | 0. 382331922                |
| 33. 63       | 0. 978068411                | 0. 413949031                | 33. 63       | 1. 022412473                | 0. 487548788                |
| 34. 63       | 1. 142668721                | 0. 484817614                | 34. 63       | 1. 189573328                | 0. 598592711                |
| 35. 63       | 1. 292587495                | 0. 526291842                | 35. 63       | 1. 374274379                | 0. 661480952                |
| 36. 63       | 1. 41272543                 | 0. 612763593                | 36. 63       | 1. 467933459                | 0. 728327195                |
| 37. 65       | 1. 565091127                | 0. 68171953                 | 37. 65       | 1. 615104058                | 0. 876642296                |
| 38. 65       | 1. 653419067                | 0. 764466654                | 38. 65       | 1. 722962344                | 0. 946896817                |
| 39. 65       | 1. 755533328                | 0. 838757867                | 39. 65       | 1. 821521542                | 1. 049804849                |

| Experiment derived linear regression |           |
|--------------------------------------|-----------|
| parameter                            | value     |
| y0                                   | -0. 1386  |
| a                                    | 3. 0123   |
| R                                    | 0.9970893 |

| Experiment derived linear regression |            |
|--------------------------------------|------------|
| parameter                            | value      |
| y0                                   | -0. 1084   |
| a                                    | 2. 6762    |
| R                                    | 0.98346659 |

**B2**

| Well /<br>Cycle | FAM Normalized<br>Fluorescence | VIC Normalized<br>Fluorescence |
|-----------------|--------------------------------|--------------------------------|
| 0.56            | -0.026021389                   | -0.011167537                   |
| 1.56            | -0.008969103                   | -0.003586127                   |
| 2.56            | 0.013878296                    | -0.009603119                   |
| 3.56            | -0.003107379                   | 0.000144408                    |
| 4.56            | 0.005818426                    | 0.000986787                    |
| 5.56            | 0.013212191                    | 0.008327517                    |
| 6.56            | 0.008616067                    | 0.006402079                    |
| 7.56            | 0.000289756                    | 0.009410575                    |
| 8.56            | 0.015476948                    | 0.001708826                    |
| 9.56            | 0.011147266                    | 0.012539411                    |
| 10.56           | 0.018940693                    | 0.009891935                    |
| 11.56           | 0.008349625                    | 0.001468146                    |
| 12.56           | 0.01714221                     | 0.014825868                    |
| 13.56           | 0.016409495                    | 0.000866447                    |
| 14.56           | 0.01980663                     | 0.003874943                    |
| 15.56           | 0.005418764                    | 0.003513923                    |
| 16.58           | 0.006484531                    | 0.004115623                    |
| 17.58           | -0.006837567                   | -0.012130256                   |
| 18.58           | 0.028599215                    | 0.003754603                    |
| 19.58           | -0.002374664                   | -0.00129967                    |
| 20.58           | 0.019606798                    | -0.003225108                   |
| 21.58           | -0.006437904                   | 0.004596982                    |
| 22.58           | 0.005418764                    | -0.009964139                   |
| 23.58           | -0.003640263                   | 0.003393583                    |
| 24.58           | 0.020006461                    | 0.009049556                    |
| 25.58           | 0.012945749                    | 0.021925919                    |
| 26.58           | 0.036992137                    | 0.029868348                    |
| 27.58           | 0.072761971                    | 0.042143012                    |
| 28.56           | 0.159821884                    | 0.055861754                    |
| 29.61           | 0.229563068                    | 0.085224674                    |
| 30.56           | 0.361585063                    | 0.120123228                    |
| 31.63           | 0.43425711                     | 0.184866062                    |
| 32.63           | 0.624629895                    | 0.220847674                    |
| 33.63           | 0.707226905                    | 0.290043082                    |
| 34.63           | 0.828191558                    | 0.356952033                    |
| 35.63           | 0.974867861                    | 0.40376423                     |
| 36.63           | 1.118946355                    | 0.442754338                    |
| 37.65           | 1.219394977                    | 0.48655804                     |
| 38.65           | 1.300193503                    | 0.521576933                    |
| 39.65           | 1.39451396                     | 0.587643505                    |

| Experiment derived linear regression |            |
|--------------------------------------|------------|
| parameter                            | value      |
| y0                                   | -0.0242    |
| a                                    | 2.8275     |
| R                                    | 0.98357906 |

| AVERAGE |           |
|---------|-----------|
|         | value     |
| y0      | -0.088225 |
| a       | 2.82955   |
| R       |           |

| Well /<br>Cycle | Raw fluorescence data |            |            |            | Well /<br>Cycle | B4      | B5    | B6    | B8    |
|-----------------|-----------------------|------------|------------|------------|-----------------|---------|-------|-------|-------|
|                 | B4                    | B5         | B6         | B8         |                 |         |       |       |       |
| 0.56            | 175.59                | 159.74     | 168.86     | 164.05     | 0.56            | -0.0205 | -0.05 | -0.04 | -0.04 |
| 1.56            | 179.13                | 161.81     | 172.04     | 167.75     | 1.56            | -0.0007 | -0.04 | -0.02 | -0.02 |
| 2.56            | 183.65                | 166.73     | 175.03     | 170.58     | 2.56            | 0.0245  | -0.01 | 0.00  | -0.01 |
| 3.56            | 179.46                | 164.12     | 173.61     | 168.52     | 3.56            | 0.0011  | -0.02 | -0.01 | -0.02 |
| 4.56            | 185.10                | 168.13     | 177.61     | 172.24     | 4.56            | 0.0326  | 0.00  | 0.01  | 0.00  |
| 5.56            | 182.77                | 166.71     | 175.22     | 167.97     | 5.56            | 0.0196  | -0.01 | 0.00  | -0.02 |
| 6.56            | 181.98                | 170.30     | 178.95     | 172.66     | 6.56            | 0.0151  | 0.01  | 0.02  | 0.01  |
| 7.56            | 182.89                | 168.17     | 177.04     | 178.44     | 7.56            | 0.0202  | 0.00  | 0.01  | 0.04  |
| 8.56            | 183.26                | 170.83     | 178.11     | 173.34     | 8.56            | 0.0223  | 0.02  | 0.02  | 0.01  |
| 9.56            | 181.05                | 168.01     | 176.98     | 174.41     | 9.56            | 0.0100  | 0.00  | 0.01  | 0.02  |
| 10.56           | 184.90                | 169.60     | 178.12     | 173.01     | 10.56           | 0.0314  | 0.01  | 0.02  | 0.01  |
| 11.56           | 179.71                | 170.73     | 177.75     | 173.32     | 11.56           | 0.0025  | 0.02  | 0.02  | 0.01  |
| 12.56           | 182.45                | 170.06     | 178.68     | 174.42     | 12.56           | 0.0178  | 0.01  | 0.02  | 0.02  |
| 13.56           | 182.55                | 171.05     | 176.92     | 171.51     | 13.56           | 0.0183  | 0.02  | 0.01  | 0.00  |
| 14.56           | 183.93                | 171.79     | 177.74     | 176.53     | 14.56           | 0.0260  | 0.02  | 0.01  | 0.03  |
| 15.56           | 180.18                | 168.41     | 177.42     | 171.97     | 15.56           | 0.0051  | 0.00  | 0.01  | 0.00  |
| 16.58           | 182.42                | 172.24     | 178.23     | 175.68     | 16.58           | 0.0176  | 0.03  | 0.02  | 0.02  |
| 17.58           | 177.29                | 169.16     | 175.39     | 172.46     | 17.58           | -0.0110 | 0.01  | 0.00  | 0.00  |
| 18.58           | 181.30                | 171.97     | 176.81     | 175.24     | 18.58           | 0.0114  | 0.02  | 0.01  | 0.02  |
| 19.58           | 176.51                | 171.60     | 174.98     | 176.20     | 19.58           | -0.0154 | 0.02  | 0.00  | 0.03  |
| 20.58           | 179.55                | 172.23     | 174.92     | 174.35     | 20.58           | 0.0016  | 0.03  | 0.00  | 0.02  |
| 21.58           | 177.81                | 169.88     | 177.67     | 176.76     | 21.58           | -0.0081 | 0.01  | 0.01  | 0.03  |
| 22.58           | 176.65                | 170.34     | 178.79     | 178.86     | 22.58           | -0.0146 | 0.01  | 0.02  | 0.04  |
| 23.58           | 179.05                | 172.41     | 179.81     | 175.31     | 23.58           | -0.0012 | 0.03  | 0.03  | 0.02  |
| 24.58           | 180.85                | 173.60     | 180.63     | 178.75     | 24.58           | 0.0088  | 0.03  | 0.03  | 0.04  |
| 25.58           | 179.41                | 173.29     | 180.78     | 179.23     | 25.58           | 0.0008  | 0.03  | 0.03  | 0.04  |
| 26.58           | 188.44                | 179.30     | 185.21     | 179.93     | 26.58           | 0.0512  | 0.07  | 0.06  | 0.05  |
| 27.58           | 191.14                | 183.22     | 190.31     | 187.67     | 27.58           | 0.0662  | 0.09  | 0.09  | 0.09  |
| 28.56           | 210.00                | 194.93     | 206.41     | 206.32     | 28.56           | 0.1715  | 0.16  | 0.18  | 0.20  |
| 29.61           | 227.52                | 208.93     | 224.23     | 220.17     | 29.61           | 0.2692  | 0.24  | 0.28  | 0.28  |
| 30.56           | 254.58                | 229.98     | 254.32     | 245.62     | 30.56           | 0.4201  | 0.37  | 0.45  | 0.43  |
| 31.63           | 274.68                | 246.65     | 271.49     | 267.31     | 31.63           | 0.5323  | 0.47  | 0.55  | 0.56  |
| 32.63           | 306.63                | 275.34     | 306.85     | 296.26     | 32.63           | 0.7105  | 0.64  | 0.75  | 0.73  |
| 33.63           | 326.50                | 293.20     | 323.69     | 315.19     | 33.63           | 0.8213  | 0.75  | 0.85  | 0.84  |
| 34.63           | 349.95                | 313.98     | 347.36     | 341.08     | 34.63           | 0.9521  | 0.87  | 0.98  | 0.99  |
| 35.63           | 379.65                | 333.14     | 376.41     | 365.01     | 35.63           | 1.1178  | 0.98  | 1.15  | 1.13  |
| 36.63           | 397.53                | 351.94     | 397.26     | 382.36     | 36.63           | 1.2176  | 1.10  | 1.27  | 1.23  |
| 37.65           | 423.00                | 370.93     | 419.50     | 408.17     | 37.65           | 1.3596  | 1.21  | 1.40  | 1.38  |
| 38.65           | 441.05                | 389.38     | 435.44     | 423.92     | 38.65           | 1.4603  | 1.32  | 1.49  | 1.47  |
| 39.65           | 461.47                | 400.13     | 451.98     | 438.36     | 39.65           | 1.5742  | 1.38  | 1.58  | 1.55  |
| Parameter       |                       |            |            |            |                 |         |       |       |       |
| a               | 296.948200            | 251.330500 | 293.646300 | 285.991000 |                 |         |       |       |       |
| b               | 2.479400              | 2.593700   | 2.506000   | 2.574600   |                 |         |       |       |       |
| x0              | 33.692300             | 33.724100  | 33.535900  | 33.594200  |                 |         |       |       |       |
| y0              | 179.264200            | 167.853500 | 175.121100 | 171.736700 |                 |         |       |       |       |
| R               | 0.998081              | 0.998774   | 0.998724   | 0.998700   |                 |         |       |       |       |

CP<sub>(SDM)</sub>

30.43

30.31

30.24

30.20

| Well /<br>Cycle     | B4     | B5     | B6     | B8     | Well /<br>Cycle | luorescence Data Normalized To Y | B4    | B5    | B6    | B8 |
|---------------------|--------|--------|--------|--------|-----------------|----------------------------------|-------|-------|-------|----|
| 0.56                | 86.9   | 87.98  | 94.48  | 87.47  | 0.56            | -0.01                            | -0.03 | -0.03 | -0.03 |    |
| 1.56                | 88.33  | 90.19  | 97.31  | 89.05  | 1.56            | 0.01                             | -0.01 | 0.00  | -0.02 |    |
| 2.56                | 88.63  | 90.34  | 95.59  | 88.9   | 2.56            | 0.01                             | -0.01 | -0.01 | -0.02 |    |
| 3.56                | 88.29  | 90.53  | 96.29  | 89.03  | 3.56            | 0.01                             | 0.00  | -0.01 | -0.02 |    |
| 4.56                | 88.31  | 89.94  | 96.79  | 89.39  | 4.56            | 0.01                             | -0.01 | 0.00  | -0.01 |    |
| 5.56                | 87.48  | 92.6   | 97.16  | 90     | 5.56            | 0.00                             | 0.02  | 0.00  | -0.01 |    |
| 6.56                | 88.35  | 89.88  | 97.18  | 91.09  | 6.56            | 0.01                             | -0.01 | 0.00  | 0.01  |    |
| 7.56                | 88.34  | 91.69  | 97.04  | 90.99  | 7.56            | 0.01                             | 0.01  | 0.00  | 0.01  |    |
| 8.56                | 88.58  | 92.66  | 98.27  | 90.69  | 8.56            | 0.01                             | 0.02  | 0.01  | 0.00  |    |
| 9.56                | 89.01  | 90.98  | 97.24  | 91.94  | 9.56            | 0.02                             | 0.00  | 0.00  | 0.02  |    |
| 10.56               | 88.37  | 92.12  | 97.27  | 90.62  | 10.56           | 0.01                             | 0.01  | 0.00  | 0.00  |    |
| 11.56               | 89.08  | 91.2   | 97.66  | 92.04  | 11.56           | 0.02                             | 0.00  | 0.01  | 0.02  |    |
| 12.56               | 89.33  | 90.94  | 97.37  | 91.8   | 12.56           | 0.02                             | 0.00  | 0.00  | 0.01  |    |
| 13.56               | 87.25  | 91.21  | 97.52  | 92.36  | 13.56           | 0.00                             | 0.00  | 0.01  | 0.02  |    |
| 14.56               | 88.3   | 91.9   | 99.23  | 92.28  | 14.56           | 0.01                             | 0.01  | 0.02  | 0.02  |    |
| 15.56               | 87.84  | 91.11  | 98.21  | 90.47  | 15.56           | 0.00                             | 0.00  | 0.01  | 0.00  |    |
| 16.58               | 86.89  | 91.06  | 96.91  | 89.01  | 16.58           | -0.01                            | 0.00  | 0.00  | -0.02 |    |
| 17.58               | 87.48  | 91.96  | 97.83  | 91.69  | 17.58           | 0.00                             | 0.01  | 0.01  | 0.01  |    |
| 18.58               | 87.72  | 91.82  | 97.55  | 91.59  | 18.58           | 0.00                             | 0.01  | 0.01  | 0.01  |    |
| 19.58               | 87.88  | 91.49  | 97.82  | 91.93  | 19.58           | 0.00                             | 0.01  | 0.01  | 0.02  |    |
| 20.58               | 86.53  | 91.14  | 97.2   | 92.16  | 20.58           | -0.01                            | 0.00  | 0.00  | 0.02  |    |
| 21.58               | 87.67  | 91.67  | 98.99  | 92.62  | 21.58           | 0.00                             | 0.01  | 0.02  | 0.02  |    |
| 22.58               | 86.78  | 93.55  | 98.35  | 90.94  | 22.58           | -0.01                            | 0.03  | 0.01  | 0.01  |    |
| 23.58               | 88.8   | 94.15  | 99.21  | 93.67  | 23.58           | 0.02                             | 0.04  | 0.02  | 0.04  |    |
| 24.58               | 87.95  | 93.51  | 99.67  | 93.64  | 24.58           | 0.01                             | 0.03  | 0.03  | 0.04  |    |
| 25.58               | 89.3   | 94.44  | 100.97 | 93.86  | 25.58           | 0.02                             | 0.04  | 0.04  | 0.04  |    |
| 26.58               | 91.45  | 97.99  | 101.02 | 97.68  | 26.58           | 0.05                             | 0.08  | 0.04  | 0.08  |    |
| 27.58               | 92.45  | 99.08  | 105.29 | 99.29  | 27.58           | 0.06                             | 0.09  | 0.09  | 0.10  |    |
| 28.56               | 98.13  | 101.14 | 108.13 | 101.77 | 28.56           | 0.12                             | 0.11  | 0.12  | 0.12  |    |
| 29.61               | 103.18 | 109.13 | 116.16 | 107.08 | 29.61           | 0.18                             | 0.20  | 0.20  | 0.18  |    |
| 30.56               | 110.8  | 112.82 | 121.11 | 111.22 | 30.56           | 0.27                             | 0.24  | 0.25  | 0.23  |    |
| 31.63               | 123.83 | 122.87 | 133.88 | 119.91 | 31.63           | 0.42                             | 0.35  | 0.38  | 0.33  |    |
| 32.63               | 134.38 | 129.28 | 144.85 | 128.74 | 32.63           | 0.54                             | 0.42  | 0.49  | 0.42  |    |
| 33.63               | 147.62 | 139.72 | 155.82 | 142.14 | 33.63           | 0.69                             | 0.54  | 0.61  | 0.57  |    |
| 34.63               | 160.25 | 150.45 | 169.15 | 150.51 | 34.63           | 0.83                             | 0.65  | 0.75  | 0.66  |    |
| 35.63               | 169.43 | 157.2  | 179.76 | 161.65 | 35.63           | 0.94                             | 0.73  | 0.85  | 0.79  |    |
| 36.63               | 183.97 | 165.27 | 192.72 | 166.55 | 36.63           | 1.10                             | 0.82  | 0.99  | 0.84  |    |
| 37.65               | 191.38 | 175.69 | 204.77 | 180.31 | 37.65           | 1.19                             | 0.93  | 1.11  | 0.99  |    |
| 38.65               | 202.69 | 182.09 | 216.14 | 187.43 | 38.65           | 1.32                             | 1.00  | 1.23  | 1.07  |    |
| 39.65               | 214.58 | 188.06 | 226.18 | 198.34 | 39.65           | 1.45                             | 1.07  | 1.33  | 1.19  |    |
| a                   | 137.35 | 111.32 | 149.57 | 127.16 |                 |                                  |       |       |       |    |
| b                   | 2.4762 | 2.8197 | 2.7386 | 2.9086 |                 |                                  |       |       |       |    |
| x0                  | 34.43  | 34.408 | 34.9   | 35.061 |                 |                                  |       |       |       |    |
| y0                  | 87.487 | 90.907 | 96.913 | 90.469 |                 |                                  |       |       |       |    |
| R                   | 0.9989 | 0.9993 | 0.9994 | 0.9988 |                 |                                  |       |       |       |    |
| CP <sub>(SDM)</sub> | 31.17  | 30.69  | 31.29  | 31.23  |                 |                                  |       |       |       |    |

| B4              |                                |                                | B5              |                                |                                |
|-----------------|--------------------------------|--------------------------------|-----------------|--------------------------------|--------------------------------|
| Well /<br>Cycle | FAM Normalized<br>Fluorescence | VIC Normalized<br>Fluorescence | Well /<br>Cycle | FAM Normalized<br>Fluorescence | VIC Normalized<br>Fluorescence |
| 0.56            | -0.020496005                   | -0.006711839                   | 0.56            | -0.048336794                   | -0.032193482                   |
| 1.56            | -0.000748616                   | 0.009633409                    | 1.56            | -0.036004611                   | -0.007882816                   |
| 2.56            | 0.024465565                    | 0.013062482                    | 2.56            | -0.006693337                   | -0.006232771                   |
| 3.56            | 0.001092243                    | 0.009176199                    | 3.56            | -0.02224261                    | -0.004142714                   |
| 4.56            | 0.032554185                    | 0.009404804                    | 4.56            | 0.00164727                     | -0.010632891                   |
| 5.56            | 0.01955661                     | -8.22978E-05                   | 5.56            | -0.006812488                   | 0.01862791                     |
| 6.56            | 0.015149706                    | 0.009862014                    | 6.56            | 0.01457521                     | -0.011292909                   |
| 7.56            | 0.020226013                    | 0.009747712                    | 7.56            | 0.001885573                    | 0.008617636                    |
| 8.56            | 0.022290005                    | 0.01249097                     | 8.56            | 0.017732725                    | 0.019287928                    |
| 9.56            | 0.009961833                    | 0.017405975                    | 9.56            | 0.000932361                    | 0.000807422                    |
| 10.56           | 0.031438514                    | 0.010090619                    | 10.56           | 0.010404907                    | 0.013347766                    |
| 11.56           | 0.002486832                    | 0.018206092                    | 11.56           | 0.017136968                    | 0.003227488                    |
| 12.56           | 0.017771535                    | 0.021063653                    | 12.56           | 0.013145392                    | 0.00036741                     |
| 13.56           | 0.018329371                    | -0.002711254                   | 13.56           | 0.019043392                    | 0.003337491                    |
| 14.56           | 0.026027506                    | 0.009290502                    | 14.56           | 0.023451998                    | 0.010927699                    |
| 15.56           | 0.005108661                    | 0.00403259                     | 15.56           | 0.003315391                    | 0.002237461                    |
| 16.58           | 0.017604184                    | -0.006826141                   | 16.58           | 0.026132908                    | 0.001687446                    |
| 17.58           | -0.011012796                   | -8.22978E-05                   | 17.58           | 0.007783573                    | 0.011587718                    |
| 18.58           | 0.011356423                    | 0.002660961                    | 18.58           | 0.024524362                    | 0.010047675                    |
| 19.58           | -0.015363915                   | 0.0044898                      | 19.58           | 0.022320059                    | 0.006417576                    |
| 20.58           | 0.001594295                    | -0.010941029                   | 20.58           | 0.026073332                    | 0.00256747                     |
| 21.58           | -0.008112049                   | 0.002089449                    | 21.58           | 0.012073028                    | 0.00839763                     |
| 22.58           | -0.014582945                   | -0.008083468                   | 22.58           | 0.014813513                    | 0.029078197                    |
| 23.58           | -0.001194884                   | 0.015005624                    | 23.58           | 0.027145696                    | 0.035678378                    |
| 24.58           | 0.008846161                    | 0.005289917                    | 24.58           | 0.034235211                    | 0.028638185                    |
| 25.58           | 0.000813325                    | 0.020720745                    | 25.58           | 0.032388362                    | 0.038868465                    |
| 26.58           | 0.051185903                    | 0.045295769                    | 26.58           | 0.068193395                    | 0.077919535                    |
| 27.58           | 0.066247472                    | 0.056726012                    | 27.58           | 0.091547093                    | 0.089909864                    |
| 28.56           | 0.171455316                    | 0.121649796                    | 28.56           | 0.161310309                    | 0.112570484                    |
| 29.61           | 0.269188159                    | 0.179372525                    | 29.61           | 0.244716375                    | 0.200462893                    |
| 30.56           | 0.420138544                    | 0.266470981                    | 30.56           | 0.370123352                    | 0.241054005                    |
| 31.63           | 0.532263553                    | 0.415407054                    | 31.63           | 0.469436145                    | 0.351607034                    |
| 32.63           | 0.710492112                    | 0.535996123                    | 32.63           | 0.640359004                    | 0.422118966                    |
| 33.63           | 0.821334098                    | 0.687332547                    | 33.63           | 0.746761313                    | 0.536962113                    |
| 34.63           | 0.952146608                    | 0.831696522                    | 34.63           | 0.870559744                    | 0.654995347                    |
| 35.63           | 1.11782386                     | 0.936626158                    | 35.63           | 0.984706902                    | 0.729247381                    |
| 36.63           | 1.217564913                    | 1.102821899                    | 36.63           | 1.096709333                    | 0.818019814                    |
| 37.65           | 1.359645707                    | 1.187520003                    | 37.65           | 1.209843703                    | 0.932642954                    |
| 38.65           | 1.460335081                    | 1.316796057                    | 38.65           | 1.319760982                    | 1.003044883                    |
| 39.65           | 1.574245164                    | 1.452701652                    | 39.65           | 1.383804925                    | 1.068716683                    |

  

| Experiment derived linear regression |            | Experiment derived linear regression |            |
|--------------------------------------|------------|--------------------------------------|------------|
| parameter                            | value      | parameter                            | value      |
| y0                                   | 0.011      | y0                                   | -0.0426    |
| a                                    | 1.3227     | a                                    | 1.5671     |
| R                                    | 0.99276711 | R                                    | 0.99092575 |

| B6              |                                |                                | B8              |                                |                                |
|-----------------|--------------------------------|--------------------------------|-----------------|--------------------------------|--------------------------------|
| Well /<br>Cycle | FAM Normalized<br>Fluorescence | VIC Normalized<br>Fluorescence | Well /<br>Cycle | FAM Normalized<br>Fluorescence | VIC Normalized<br>Fluorescence |
| 0. 56           | -0. 035752973                  | -0. 025105997                  | 0. 56           | -0. 044758633                  | -0. 033149477                  |
| 1. 56           | -0. 017594111                  | 0. 004095422                   | 1. 56           | -0. 023214025                  | -0. 015684931                  |
| 2. 56           | -0. 000520211                  | -0. 013652437                  | 2. 56           | -0. 006735311                  | -0. 017342957                  |
| 3. 56           | -0. 008628886                  | -0. 006429471                  | 3. 56           | -0. 018730417                  | -0. 015906001                  |
| 4. 56           | 0. 014212451                   | -0. 00127021                   | 4. 56           | 0. 002930649                   | -0. 011926737                  |
| 5. 56           | 0. 000564752                   | 0. 002547643                   | 5. 56           | -0. 021932994                  | -0. 005184096                  |
| 6. 56           | 0. 021864298                   | 0. 002754014                   | 6. 56           | 0. 005376253                   | 0. 00686423                    |
| 7. 56           | 0. 01095756                    | 0. 001309421                   | 7. 56           | 0. 039032426                   | 0. 005758879                   |
| 8. 56           | 0. 017067618                   | 0. 014001203                   | 8. 56           | 0. 009335803                   | 0. 002442826                   |
| 9. 56           | 0. 01061494                    | 0. 003373125                   | 9. 56           | 0. 015566271                   | 0. 016259713                   |
| 10. 56          | 0. 017124721                   | 0. 003682681                   | 10. 56          | 0. 007414257                   | 0. 00166908                    |
| 11. 56          | 0. 015011897                   | 0. 007706904                   | 11. 56          | 0. 009219346                   | 0. 017365064                   |
| 12. 56          | 0. 020322508                   | 0. 004714533                   | 12. 56          | 0. 0156245                     | 0. 014712222                   |
| 13. 56          | 0. 01027232                    | 0. 006262311                   | 13. 56          | -0. 001320044                  | 0. 020902187                   |
| 14. 56          | 0. 014954794                   | 0. 023906985                   | 14. 56          | 0. 027910749                   | 0. 020017907                   |
| 15. 56          | 0. 013127487                   | 0. 013382092                   | 15. 56          | 0. 001358475                   | 1. 10535E-05                   |
| 16. 58          | 0. 017752858                   | -3. 19874E-05                  | 16. 58          | 0. 022961312                   | -0. 016127071                  |
| 17. 58          | 0. 001535509                   | 0. 009461053                   | 17. 58          | 0. 00421168                    | 0. 013496336                   |
| 18. 58          | 0. 009644183                   | 0. 006571867                   | 18. 58          | 0. 020399251                   | 0. 012390985                   |
| 19. 58          | -0. 000805728                  | 0. 009357868                   | 19. 58          | 0. 025989203                   | 0. 016149178                   |
| 20. 58          | -0. 001148348                  | 0. 002960384                   | 20. 58          | 0. 015216899                   | 0. 018691485                   |
| 21. 58          | 0. 014555071                   | 0. 021430539                   | 21. 58          | 0. 029250009                   | 0. 0237761                     |
| 22. 58          | 0. 020950645                   | 0. 014826685                   | 22. 58          | 0. 04147803                    | 0. 005206203                   |
| 23. 58          | 0. 026775186                   | 0. 023700614                   | 23. 58          | 0. 020806851                   | 0. 035382286                   |
| 24. 58          | 0. 03145766                    | 0. 028447135                   | 24. 58          | 0. 040837515                   | 0. 03505068                    |
| 25. 58          | 0. 03231421                    | 0. 041861214                   | 25. 58          | 0. 043632491                   | 0. 037482453                   |
| 26. 58          | 0. 05761099                    | 0. 04237714                    | 26. 58          | 0. 047708498                   | 0. 079706861                   |
| 27. 58          | 0. 086733695                   | 0. 086437231                   | 27. 58          | 0. 09277749                    | 0. 097503012                   |
| 28. 56          | 0. 178670075                   | 0. 115741835                   | 28. 56          | 0. 201373964                   | 0. 124915717                   |
| 29. 61          | 0. 280428229                   | 0. 19859957                    | 29. 61          | 0. 282020675                   | 0. 183609855                   |
| 30. 56          | 0. 452252184                   | 0. 249676256                   | 30. 56          | 0. 430212645                   | 0. 229371387                   |
| 31. 63          | 0. 550298622                   | 0. 381443788                   | 31. 63          | 0. 556510635                   | 0. 325426389                   |
| 32. 63          | 0. 752216038                   | 0. 49463798                    | 32. 63          | 0. 725082641                   | 0. 423028883                   |
| 33. 63          | 0. 848378065                   | 0. 607832171                   | 33. 63          | 0. 835309517                   | 0. 571145917                   |
| 34. 63          | 0. 983541675                   | 0. 745378076                   | 34. 63          | 0. 98606355                    | 0. 663663796                   |
| 35. 63          | 1. 149426882                   | 0. 854857599                   | 35. 63          | 1. 125404762                   | 0. 786799898                   |
| 36. 63          | 1. 26848735                    | 0. 98858565                    | 36. 63          | 1. 226431508                   | 0. 840962098                   |
| 37. 65          | 1. 395485181                   | 1. 112923846                   | 37. 65          | 1. 376719711                   | 0. 993058396                   |
| 38. 65          | 1. 486507908                   | 1. 230245447                   | 38. 65          | 1. 46842987                    | 1. 071759387                   |
| 39. 65          | 1. 580956835                   | 1. 333843412                   | 39. 65          | 1. 552512072                   | 1. 192353182                   |

| Experiment derived linear regress |            |
|-----------------------------------|------------|
| parameter                         | value      |
| y0                                | -0. 0106   |
| a                                 | 1. 5504    |
| R                                 | 0.98942526 |

| Experiment derived linear regress |                 |
|-----------------------------------|-----------------|
| parameter                         | value           |
| y0                                | -0. 073 0. 0281 |
| a                                 | 1. 9448 0. 117  |
| R                                 | 0.99106621      |

| AVERAGE |          |
|---------|----------|
|         | value    |
| y0      | -0. 0288 |
| a       | 1. 59625 |
| R       |          |

| Well /<br>Cycle           | Raw fluorescence data |            |            |            | Well /<br>Cycle | B9      | C3    | C4    | C5    |
|---------------------------|-----------------------|------------|------------|------------|-----------------|---------|-------|-------|-------|
|                           | B9                    | C3         | C4         | C5         |                 |         |       |       |       |
| 0.56                      | 192.55                | 165.46     | 190.28     | 157.44     | 0.56            | -0.0149 | -0.02 | -0.04 | -0.03 |
| 1.56                      | 191.71                | 169.21     | 195.87     | 156.54     | 1.56            | -0.0192 | 0.01  | -0.01 | -0.04 |
| 2.56                      | 198.93                | 169.48     | 199.10     | 161.99     | 2.56            | 0.0177  | 0.01  | 0.00  | -0.01 |
| 3.56                      | 195.46                | 170.30     | 195.89     | 161.64     | 3.56            | 0.0000  | 0.01  | -0.01 | -0.01 |
| 4.56                      | 202.43                | 169.98     | 199.70     | 163.49     | 4.56            | 0.0357  | 0.01  | 0.01  | 0.00  |
| 5.56                      | 198.00                | 171.51     | 199.20     | 164.17     | 5.56            | 0.0130  | 0.02  | 0.00  | 0.01  |
| 6.56                      | 197.12                | 174.03     | 203.97     | 165.38     | 6.56            | 0.0085  | 0.03  | 0.03  | 0.02  |
| 7.56                      | 197.52                | 171.30     | 200.96     | 162.62     | 7.56            | 0.0105  | 0.02  | 0.01  | 0.00  |
| 8.56                      | 199.19                | 171.12     | 204.95     | 163.88     | 8.56            | 0.0191  | 0.02  | 0.03  | 0.01  |
| 9.56                      | 203.40                | 169.96     | 200.54     | 166.14     | 9.56            | 0.0406  | 0.01  | 0.01  | 0.02  |
| 10.56                     | 198.46                | 171.50     | 203.23     | 166.64     | 10.56           | 0.0153  | 0.02  | 0.02  | 0.02  |
| 11.56                     | 193.77                | 170.99     | 201.25     | 162.21     | 11.56           | -0.0087 | 0.02  | 0.01  | 0.00  |
| 12.56                     | 199.77                | 171.93     | 203.99     | 165.93     | 12.56           | 0.0220  | 0.02  | 0.03  | 0.02  |
| 13.56                     | 195.64                | 167.45     | 198.47     | 163.96     | 13.56           | 0.0009  | -0.01 | 0.00  | 0.01  |
| 14.56                     | 198.76                | 170.86     | 203.94     | 164.89     | 14.56           | 0.0169  | 0.01  | 0.03  | 0.01  |
| 15.56                     | 198.92                | 167.50     | 198.94     | 164.73     | 15.56           | 0.0177  | -0.01 | 0.00  | 0.01  |
| 16.58                     | 198.47                | 170.44     | 200.85     | 166.17     | 16.58           | 0.0154  | 0.01  | 0.01  | 0.02  |
| 17.58                     | 195.72                | 167.46     | 199.37     | 165.73     | 17.58           | 0.0013  | -0.01 | 0.00  | 0.02  |
| 18.58                     | 198.91                | 169.55     | 201.09     | 163.79     | 18.58           | 0.0176  | 0.01  | 0.01  | 0.01  |
| 19.58                     | 189.55                | 168.33     | 198.29     | 163.92     | 19.58           | -0.0302 | 0.00  | 0.00  | 0.01  |
| 20.58                     | 196.81                | 169.42     | 198.29     | 163.11     | 20.58           | 0.0069  | 0.01  | 0.00  | 0.00  |
| 21.58                     | 193.18                | 165.84     | 195.70     | 165.16     | 21.58           | -0.0117 | -0.01 | -0.01 | 0.01  |
| 22.58                     | 195.44                | 164.93     | 200.41     | 167.88     | 22.58           | -0.0001 | -0.02 | 0.01  | 0.03  |
| 23.58                     | 193.78                | 165.07     | 199.57     | 163.20     | 23.58           | -0.0086 | -0.02 | 0.01  | 0.00  |
| 24.58                     | 197.74                | 169.96     | 200.63     | 165.99     | 24.58           | 0.0117  | 0.01  | 0.01  | 0.02  |
| 25.58                     | 198.16                | 168.60     | 198.11     | 167.22     | 25.58           | 0.0138  | 0.00  | 0.00  | 0.03  |
| 26.58                     | 205.27                | 171.89     | 205.91     | 170.65     | 26.58           | 0.0502  | 0.02  | 0.04  | 0.05  |
| 27.58                     | 213.23                | 177.48     | 210.43     | 174.06     | 27.58           | 0.0909  | 0.05  | 0.06  | 0.07  |
| 28.56                     | 226.26                | 191.98     | 225.18     | 186.98     | 28.56           | 0.1576  | 0.14  | 0.14  | 0.15  |
| 29.61                     | 241.65                | 198.78     | 239.70     | 195.07     | 29.61           | 0.2363  | 0.18  | 0.21  | 0.20  |
| 30.56                     | 271.48                | 219.84     | 264.15     | 215.66     | 30.56           | 0.3889  | 0.31  | 0.33  | 0.32  |
| 31.63                     | 289.45                | 231.06     | 285.79     | 229.79     | 31.63           | 0.4809  | 0.37  | 0.44  | 0.41  |
| 32.63                     | 314.21                | 259.21     | 321.57     | 258.26     | 32.63           | 0.6075  | 0.54  | 0.62  | 0.59  |
| 33.63                     | 338.58                | 271.92     | 341.15     | 272.45     | 33.63           | 0.7322  | 0.62  | 0.72  | 0.67  |
| 34.63                     | 356.74                | 289.07     | 364.95     | 293.40     | 34.63           | 0.8251  | 0.72  | 0.84  | 0.80  |
| 35.63                     | 388.73                | 311.35     | 394.72     | 315.96     | 35.63           | 0.9888  | 0.85  | 0.99  | 0.94  |
| 36.63                     | 407.35                | 328.25     | 417.63     | 333.07     | 36.63           | 1.0840  | 0.95  | 1.11  | 1.05  |
| 37.65                     | 428.90                | 346.35     | 436.17     | 354.70     | 37.65           | 1.1943  | 1.06  | 1.20  | 1.18  |
| 38.65                     | 445.80                | 361.03     | 455.74     | 364.35     | 38.65           | 1.2808  | 1.14  | 1.30  | 1.24  |
| 39.65                     | 464.40                | 370.92     | 476.69     | 378.99     | 39.65           | 1.3759  | 1.20  | 1.40  | 1.33  |
| <b>a</b>                  | 286.197600            | 217.443800 | 291.769100 | 233.357200 |                 |         |       |       |       |
| <b>b</b>                  | 2.542000              | 2.439100   | 2.391000   | 2.491100   |                 |         |       |       |       |
| <b>x0</b>                 | 33.698200             | 33.876400  | 33.780400  | 33.921400  |                 |         |       |       |       |
| <b>y0</b>                 | 195.461000            | 168.364300 | 198.392100 | 162.869400 |                 |         |       |       |       |
| <b>R</b>                  | 0.998224              | 0.998106   | 0.998393   | 0.998889   |                 |         |       |       |       |
| <b>CP<sub>(SDM)</sub></b> | 30.35                 | 30.66      | 30.63      | 30.64      |                 |         |       |       |       |

| Well /<br>Cycle           | B9     | C3     | C4     | C5     | Well /<br>Cycle | luorescence Data Normalized To Y | B9    | C3    | C4    | C5 |
|---------------------------|--------|--------|--------|--------|-----------------|----------------------------------|-------|-------|-------|----|
| 0.56                      | 86.83  | 86.98  | 91.82  | 90.94  | 0.56            | -0.03                            | 0.01  | 0.00  | -0.02 |    |
| 1.56                      | 89.09  | 88.48  | 92.02  | 93.66  | 1.56            | 0.00                             | 0.03  | 0.00  | 0.01  |    |
| 2.56                      | 86.54  | 87.57  | 92.08  | 91.69  | 2.56            | -0.03                            | 0.01  | 0.01  | -0.01 |    |
| 3.56                      | 90.38  | 88.41  | 94.1   | 94.17  | 3.56            | 0.01                             | 0.02  | 0.03  | 0.01  |    |
| 4.56                      | 88.51  | 86.73  | 92.93  | 92.19  | 4.56            | -0.01                            | 0.00  | 0.01  | -0.01 |    |
| 5.56                      | 89.96  | 87.59  | 92.76  | 92.53  | 5.56            | 0.01                             | 0.01  | 0.01  | -0.01 |    |
| 6.56                      | 89.41  | 86.83  | 91.75  | 93.77  | 6.56            | 0.00                             | 0.01  | 0.00  | 0.01  |    |
| 7.56                      | 89.6   | 87.52  | 93.23  | 93.71  | 7.56            | 0.00                             | 0.01  | 0.02  | 0.01  |    |
| 8.56                      | 90.98  | 86.67  | 91.95  | 93.76  | 8.56            | 0.02                             | 0.00  | 0.00  | 0.01  |    |
| 9.56                      | 89.86  | 87.64  | 92.69  | 93.04  | 9.56            | 0.01                             | 0.02  | 0.01  | 0.00  |    |
| 10.56                     | 91.4   | 87.8   | 92.58  | 93.92  | 10.56           | 0.02                             | 0.02  | 0.01  | 0.01  |    |
| 11.56                     | 91.27  | 87.14  | 93.15  | 94.2   | 11.56           | 0.02                             | 0.01  | 0.02  | 0.01  |    |
| 12.56                     | 89.02  | 87.2   | 92.24  | 93.82  | 12.56           | 0.00                             | 0.01  | 0.01  | 0.01  |    |
| 13.56                     | 90.54  | 86.45  | 92.75  | 93.45  | 13.56           | 0.01                             | 0.00  | 0.01  | 0.00  |    |
| 14.56                     | 88.95  | 87.63  | 91.67  | 94.09  | 14.56           | 0.00                             | 0.02  | 0.00  | 0.01  |    |
| 15.56                     | 92.25  | 86.83  | 92.93  | 93.08  | 15.56           | 0.03                             | 0.01  | 0.01  | 0.00  |    |
| 16.58                     | 90.32  | 86.1   | 92.73  | 94.43  | 16.58           | 0.01                             | 0.00  | 0.01  | 0.02  |    |
| 17.58                     | 91.42  | 85.17  | 90.25  | 93.6   | 17.58           | 0.02                             | -0.01 | -0.01 | 0.01  |    |
| 18.58                     | 88.48  | 86.24  | 91.28  | 94.07  | 18.58           | -0.01                            | 0.00  | 0.00  | 0.01  |    |
| 19.58                     | 88.79  | 86.23  | 92.41  | 93.55  | 19.58           | -0.01                            | 0.00  | 0.01  | 0.01  |    |
| 20.58                     | 90.2   | 84.5   | 90.92  | 94.84  | 20.58           | 0.01                             | -0.02 | -0.01 | 0.02  |    |
| 21.58                     | 91.11  | 85.59  | 90.72  | 94.54  | 21.58           | 0.02                             | -0.01 | -0.01 | 0.02  |    |
| 22.58                     | 89.63  | 86.65  | 91.5   | 94.12  | 22.58           | 0.00                             | 0.00  | 0.00  | 0.01  |    |
| 23.58                     | 91.21  | 86.42  | 92.06  | 94.28  | 23.58           | 0.02                             | 0.00  | 0.01  | 0.01  |    |
| 24.58                     | 91.77  | 87.25  | 92.03  | 95.23  | 24.58           | 0.03                             | 0.01  | 0.00  | 0.02  |    |
| 25.58                     | 93.15  | 88.38  | 93.51  | 97.09  | 25.58           | 0.04                             | 0.02  | 0.02  | 0.04  |    |
| 26.58                     | 93.98  | 90.54  | 95.67  | 97.62  | 26.58           | 0.05                             | 0.05  | 0.04  | 0.05  |    |
| 27.58                     | 99.76  | 94.4   | 100.13 | 101.73 | 27.58           | 0.12                             | 0.09  | 0.09  | 0.09  |    |
| 28.56                     | 101.47 | 98.09  | 103.68 | 104.97 | 28.56           | 0.14                             | 0.14  | 0.13  | 0.13  |    |
| 29.61                     | 110.45 | 106.21 | 112.06 | 113.1  | 29.61           | 0.24                             | 0.23  | 0.22  | 0.22  |    |
| 30.56                     | 117.9  | 114.38 | 118.14 | 122.84 | 30.56           | 0.32                             | 0.33  | 0.29  | 0.32  |    |
| 31.63                     | 132.33 | 126.56 | 130.7  | 136.3  | 31.63           | 0.48                             | 0.47  | 0.43  | 0.47  |    |
| 32.63                     | 139.99 | 136.72 | 145.69 | 146.84 | 32.63           | 0.57                             | 0.58  | 0.59  | 0.58  |    |
| 33.63                     | 158.24 | 153.92 | 158.55 | 164.42 | 33.63           | 0.77                             | 0.78  | 0.73  | 0.77  |    |
| 34.63                     | 174.48 | 167.3  | 174.67 | 179.6  | 34.63           | 0.95                             | 0.94  | 0.91  | 0.93  |    |
| 35.63                     | 186.26 | 177.3  | 185.85 | 193.39 | 35.63           | 1.09                             | 1.05  | 1.03  | 1.08  |    |
| 36.63                     | 194.59 | 192.29 | 197.83 | 204.45 | 36.63           | 1.18                             | 1.23  | 1.16  | 1.20  |    |
| 37.65                     | 208.18 | 203.96 | 215.65 | 217.56 | 37.65           | 1.33                             | 1.36  | 1.35  | 1.34  |    |
| 38.65                     | 219.32 | 215.93 | 226.75 | 231.43 | 38.65           | 1.46                             | 1.50  | 1.48  | 1.49  |    |
| 39.65                     | 234.61 | 226.9  | 240.16 | 241.77 | 39.65           | 1.63                             | 1.63  | 1.62  | 1.60  |    |
| <b>Parameter</b>          |        |        |        |        |                 |                                  |       |       |       |    |
| <b>a</b>                  | 159.76 | 155.57 | 167.73 | 164.37 |                 |                                  |       |       |       |    |
| <b>b</b>                  | 2.634  | 2.5538 | 2.616  | 2.5429 |                 |                                  |       |       |       |    |
| <b>x0</b>                 | 34.524 | 34.527 | 34.839 | 34.463 |                 |                                  |       |       |       |    |
| <b>y0</b>                 | 89.269 | 86.306 | 91.574 | 93.026 |                 |                                  |       |       |       |    |
| <b>R</b>                  | 0.9988 | 0.9991 | 0.999  | 0.9994 |                 |                                  |       |       |       |    |
| <b>CP<sub>(SDM)</sub></b> | 31.05  | 31.16  | 31.39  | 31.11  |                 |                                  |       |       |       |    |

| B9                                                      |                                |                                | C3                                                      |                                |                                |                                 |
|---------------------------------------------------------|--------------------------------|--------------------------------|---------------------------------------------------------|--------------------------------|--------------------------------|---------------------------------|
| Well /<br>Cycle                                         | FAM Normalized<br>Fluorescence | VIC Normalized<br>Fluorescence | Well /<br>Cycle                                         | FAM Normalized<br>Fluorescence | VIC Normalized<br>Fluorescence | Well /<br>Cycle                 |
| 0.56                                                    | -0.014892997                   | -0.027325183                   | 0.56                                                    | -0.017250094                   | 0.007812925                    | 0.56                            |
| 1.56                                                    | -0.019190529                   | -0.002008529                   | 1.56                                                    | 0.005023036                    | 0.025193006                    | 1.56                            |
| 2.56                                                    | 0.017747786                    | -0.030573781                   | 2.56                                                    | 0.006626702                    | 0.01464909                     | 2.56                            |
| 3.56                                                    | -5.11611E-06                   | 0.012442127                    | 3.56                                                    | 0.011497093                    | 0.024381935                    | 3.56                            |
| 4.56                                                    | 0.035654171                    | -0.008505724                   | 4.56                                                    | 0.009596452                    | 0.004916245                    | 4.56                            |
| 5.56                                                    | 0.012989804                    | 0.007737262                    | 5.56                                                    | 0.01868389                     | 0.014880825                    | 5.56                            |
| 6.56                                                    | 0.008487627                    | 0.00157613                     | 6.56                                                    | 0.033651433                    | 0.006074917                    | 6.56                            |
| 7.56                                                    | 0.010534071                    | 0.003704521                    | 7.56                                                    | 0.017436594                    | 0.014069754                    | 7.56                            |
| 8.56                                                    | 0.019077975                    | 0.019163363                    | 8.56                                                    | 0.016367484                    | 0.004221042                    | 8.56                            |
| 9.56                                                    | 0.040616798                    | 0.006617056                    | 9.56                                                    | 0.009477662                    | 0.015460161                    | 9.56                            |
| 10.56                                                   | 0.015343214                    | 0.023868228                    | 10.56                                                   | 0.018624495                    | 0.017314036                    | 10.56                           |
| 11.56                                                   | -0.008651342                   | 0.02241196                     | 11.56                                                   | 0.015595349                    | 0.009666801                    | 11.56                           |
| 12.56                                                   | 0.022045319                    | -0.002792673                   | 12.56                                                   | 0.02117848                     | 0.010362004                    | 12.56                           |
| 13.56                                                   | 0.000915784                    | 0.014234457                    | 13.56                                                   | -0.005430486                   | 0.001671964                    | 13.56                           |
| 14.56                                                   | 0.016878047                    | -0.003576818                   | 14.56                                                   | 0.014823214                    | 0.015344294                    | 14.56                           |
| 15.56                                                   | 0.017696625                    | 0.033389978                    | 15.56                                                   | -0.005133511                   | 0.006074917                    | 15.56                           |
| 16.58                                                   | 0.015394375                    | 0.011770004                    | 16.58                                                   | 0.012328623                    | -0.002383388                   | 16.58                           |
| 17.58                                                   | 0.001325073                    | 0.024092269                    | 17.58                                                   | -0.005371091                   | -0.013159038                   | 17.58                           |
| 18.58                                                   | 0.017645464                    | -0.008841785                   | 18.58                                                   | 0.007042467                    | -0.000761248                   | 18.58                           |
| 19.58                                                   | -0.030241327                   | -0.005369147                   | 19.58                                                   | -0.000203725                   | -0.000877115                   | 19.58                           |
| 20.58                                                   | 0.006901633                    | 0.010425757                    | 20.58                                                   | 0.006270332                    | -0.020922141                   | 20.58                           |
| 21.58                                                   | -0.011669847                   | 0.020619631                    | 21.58                                                   | -0.014993083                   | -0.008292616                   | 21.58                           |
| 22.58                                                   | -0.000107438                   | 0.004040583                    | 22.58                                                   | -0.02039803                    | 0.003989308                    | 22.58                           |
| 23.58                                                   | -0.008600181                   | 0.021739837                    | 23.58                                                   | -0.0195665                     | 0.001324362                    | 23.58                           |
| 24.58                                                   | 0.011659615                    | 0.02801299                     | 24.58                                                   | 0.009477662                    | 0.01094134                     | 24.58                           |
| 25.58                                                   | 0.013808381                    | 0.043471832                    | 25.58                                                   | 0.00139994                     | 0.024034334                    | 25.58                           |
| 26.58                                                   | 0.050183924                    | 0.052769541                    | 26.58                                                   | 0.0209409                      | 0.049061649                    | 26.58                           |
| 27.58                                                   | 0.090908161                    | 0.117517444                    | 27.58                                                   | 0.054142713                    | 0.09378639                     | 27.58                           |
| 28.56                                                   | 0.157571076                    | 0.136672966                    | 28.56                                                   | 0.140265484                    | 0.136541387                    | 28.56                           |
| 29.61                                                   | 0.23630801                     | 0.237267459                    | 29.61                                                   | 0.180654094                    | 0.230625555                    | 29.61                           |
| 30.56                                                   | 0.388921575                    | 0.320722802                    | 30.56                                                   | 0.305739994                    | 0.32528906                     | 30.56                           |
| 31.63                                                   | 0.480858074                    | 0.482368519                    | 31.63                                                   | 0.3723812                      | 0.466415312                    | 31.63                           |
| 32.63                                                   | 0.607532961                    | 0.568176294                    | 32.63                                                   | 0.539578165                    | 0.58413639                     | 32.63                           |
| 33.63                                                   | 0.732212564                    | 0.772613877                    | 33.63                                                   | 0.615069228                    | 0.783427978                    | 33.63                           |
| 34.63                                                   | 0.825121124                    | 0.954535322                    | 34.63                                                   | 0.716931677                    | 0.938458294                    | 34.63                           |
| 35.63                                                   | 0.988785487                    | 1.086495581                    | 35.63                                                   | 0.849263769                    | 1.054325496                    | 35.63                           |
| 36.63                                                   | 1.084047457                    | 1.179808736                    | 36.63                                                   | 0.949641343                    | 1.228010433                    | 36.63                           |
| 37.65                                                   | 1.19429963                     | 1.332044723                    | 37.65                                                   | 1.057146319                    | 1.363227458                    | 37.65                           |
| 38.65                                                   | 1.280761891                    | 1.456835665                    | 38.65                                                   | 1.1443382                      | 1.501920499                    | 38.65                           |
| 39.65                                                   | 1.375921539                    | 1.628115153                    | 39.65                                                   | 1.203079869                    | 1.62902682                     | 39.65                           |
| Experiment derived linear regression<br>parameter value |                                |                                | Experiment derived linear regression<br>parameter value |                                |                                | Experiment derived<br>parameter |
|                                                         | y0                             | 0.0196                         |                                                         | y0                             | 0.0135                         | y0                              |
|                                                         | a                              | 0.9704                         |                                                         | a                              | 0.9003                         | a                               |
|                                                         | R                              | 0.98788979                     |                                                         | R                              | 0.99036027                     | R                               |

| C4                                         |                             |                                                | C5                          |                             |        |
|--------------------------------------------|-----------------------------|------------------------------------------------|-----------------------------|-----------------------------|--------|
| FAM Normalized Fluorescence                | VIC Normalized Fluorescence | Well / Cycle                                   | FAM Normalized Fluorescence | VIC Normalized Fluorescence |        |
| -0.040889229                               | 0.002687447                 | 0.56                                           | -0.033335912                | -0.022423838                |        |
| -0.012712704                               | 0.004871475                 | 1.56                                           | -0.038861812                | 0.006815299                 |        |
| 0.003568186                                | 0.005526684                 | 2.56                                           | -0.005399418                | -0.014361576                |        |
| -0.012611893                               | 0.027585371                 | 3.56                                           | -0.007548379                | 0.012297637                 |        |
| 0.0065925                                  | 0.014808805                 | 4.56                                           | 0.003810415                 | -0.008986735                |        |
| 0.004072239                                | 0.012952381                 | 5.56                                           | 0.007985539                 | -0.005331843                |        |
| 0.028115535                                | 0.001923037                 | 6.56                                           | 0.015414805                 | 0.007997764                 |        |
| 0.01294356                                 | 0.018084847                 | 7.56                                           | -0.001531288                | 0.007352783                 |        |
| 0.033055248                                | 0.004107065                 | 8.56                                           | 0.006204972                 | 0.007890267                 |        |
| 0.01082654                                 | 0.012187971                 | 9.56                                           | 0.02008112                  | 0.000150496                 |        |
| 0.024385548                                | 0.010986755                 | 10.56                                          | 0.023151065                 | 0.009610216                 |        |
| 0.014405312                                | 0.017211236                 | 11.56                                          | -0.004048643                | 0.012620128                 |        |
| 0.028216345                                | 0.007273907                 | 12.56                                          | 0.018791744                 | 0.008535248                 |        |
| 0.000392657                                | 0.012843179                 | 13.56                                          | 0.006696163                 | 0.004557866                 |        |
| 0.027964319                                | 0.001049426                 | 14.56                                          | 0.012406259                 | 0.011437663                 |        |
| 0.002761703                                | 0.014808805                 | 15.56                                          | 0.011423877                 | 0.000580483                 |        |
| 0.012389102                                | 0.012624776                 | 16.58                                          | 0.020265317                 | 0.015092555                 |        |
| 0.004929128                                | -0.014457176                | 17.58                                          | 0.017563766                 | 0.006170318                 |        |
| 0.013598828                                | -0.00320943                 | 18.58                                          | 0.005652382                 | 0.011222669                 |        |
| -0.000514637                               | 0.009130331                 | 19.58                                          | 0.006450567                 | 0.005632834                 |        |
| -0.000514637                               | -0.007140681                | 20.58                                          | 0.001477257                 | 0.019499925                 |        |
| -0.013569593                               | -0.009324709                | 21.58                                          | 0.014064029                 | 0.01627502                  |        |
| 0.010171272                                | -0.000806999                | 22.58                                          | 0.030764527                 | 0.011760153                 |        |
| 0.005937232                                | 0.005308281                 | 23.58                                          | 0.002029847                 | 0.013480102                 |        |
| 0.011280187                                | 0.004980677                 | 24.58                                          | 0.019160137                 | 0.023692301                 |        |
| -0.001421932                               | 0.021142487                 | 25.58                                          | 0.0267122                   | 0.043686711                 |        |
| 0.03789415                                 | 0.044729994                 | 26.58                                          | 0.047772019                 | 0.049384043                 |        |
| 0.060677315                                | 0.093433828                 | 27.58                                          | 0.068709039                 | 0.09356524                  |        |
| 0.135025034                                | 0.132200332                 | 28.56                                          | 0.148036402                 | 0.128394212                 |        |
| 0.208213432                                | 0.223711123                 | 29.61                                          | 0.197708102                 | 0.215789134                 |        |
| 0.331454226                                | 0.290105587                 | 30.56                                          | 0.324128412                 | 0.320491046                 |        |
| 0.44053115                                 | 0.427262572                 | 31.63                                          | 0.41088504                  | 0.465181777                 |        |
| 0.620881073                                | 0.590955502                 | 32.63                                          | 0.585687674                 | 0.578483435                 |        |
| 0.719574519                                | 0.731388529                 | 33.63                                          | 0.672812695                 | 0.76746286                  |        |
| 0.839538974                                | 0.907421219                 | 34.63                                          | 0.801443365                 | 0.930643046                 |        |
| 0.989595352                                | 1.029508408                 | 35.63                                          | 0.939959256                 | 1.078881173                 |        |
| 1.10507374                                 | 1.16033171                  | 36.63                                          | 1.045012753                 | 1.197772666                 |        |
| 1.198525042                                | 1.354928642                 | 37.65                                          | 1.177818547                 | 1.338701008                 |        |
| 1.297168083                                | 1.47614222                  | 38.65                                          | 1.237068473                 | 1.48779911                  |        |
| 1.402767046                                | 1.622581325                 | 39.65                                          | 1.326956445                 | 1.598950831                 |        |
| Experiment derived linear regression value |                             | Experiment derived linear regression parameter |                             |                             |        |
| -0.0074                                    | 1.0317                      | 0.99483364                                     | y0                          | 0.0135                      | 0.0244 |
|                                            |                             |                                                | a                           | 0.9003                      | 0.0563 |
|                                            |                             |                                                | R                           | 0.99036027                  |        |
|                                            |                             | AVERAGE value                                  |                             |                             |        |
|                                            |                             |                                                | y0                          | 0.0098                      |        |
|                                            |                             |                                                | a                           | 0.950675                    |        |

| Well /<br>Cycle           | Raw fluorescence data |            |            |            | Well /<br>Cycle | C6      | C7    | C8    | C9    |
|---------------------------|-----------------------|------------|------------|------------|-----------------|---------|-------|-------|-------|
|                           | C6                    | C7         | C8         | C9         |                 |         |       |       |       |
| 0.56                      | 176.02                | 152.86     | 164.43     | 153.13     | 0.56            | -0.0579 | -0.06 | -0.05 | -0.05 |
| 1.56                      | 178.87                | 156.37     | 168.45     | 157.65     | 1.56            | -0.0426 | -0.04 | -0.02 | -0.02 |
| 2.56                      | 184.88                | 159.54     | 166.80     | 157.03     | 2.56            | -0.0104 | -0.02 | -0.03 | -0.02 |
| 3.56                      | 181.76                | 158.66     | 170.83     | 159.88     | 3.56            | -0.0271 | -0.02 | -0.01 | 0.00  |
| 4.56                      | 186.96                | 161.63     | 172.80     | 160.22     | 4.56            | 0.0007  | 0.00  | 0.00  | 0.00  |
| 5.56                      | 182.07                | 160.07     | 169.81     | 160.65     | 5.56            | -0.0255 | -0.01 | -0.02 | 0.00  |
| 6.56                      | 188.84                | 162.26     | 176.44     | 162.20     | 6.56            | 0.0108  | 0.00  | 0.02  | 0.01  |
| 7.56                      | 186.13                | 162.48     | 173.13     | 159.01     | 7.56            | -0.0037 | 0.00  | 0.00  | -0.01 |
| 8.56                      | 190.69                | 162.54     | 172.18     | 162.97     | 8.56            | 0.0207  | 0.00  | 0.00  | 0.02  |
| 9.56                      | 187.65                | 162.72     | 173.21     | 161.28     | 9.56            | 0.0044  | 0.00  | 0.00  | 0.01  |
| 10.56                     | 187.84                | 166.17     | 176.23     | 160.44     | 10.56           | 0.0054  | 0.02  | 0.02  | 0.00  |
| 11.56                     | 189.96                | 162.28     | 175.07     | 161.13     | 11.56           | 0.0168  | 0.00  | 0.01  | 0.00  |
| 12.56                     | 190.02                | 164.59     | 173.37     | 163.79     | 12.56           | 0.0171  | 0.01  | 0.00  | 0.02  |
| 13.56                     | 188.05                | 163.41     | 173.55     | 159.38     | 13.56           | 0.0065  | 0.01  | 0.00  | -0.01 |
| 14.56                     | 190.79                | 166.17     | 181.04     | 164.06     | 14.56           | 0.0212  | 0.02  | 0.05  | 0.02  |
| 15.56                     | 189.83                | 165.20     | 175.71     | 161.65     | 15.56           | 0.0161  | 0.02  | 0.02  | 0.01  |
| 16.58                     | 190.10                | 164.99     | 175.90     | 161.76     | 16.58           | 0.0175  | 0.02  | 0.02  | 0.01  |
| 17.58                     | 190.55                | 166.28     | 171.79     | 161.55     | 17.58           | 0.0199  | 0.02  | -0.01 | 0.01  |
| 18.58                     | 191.70                | 165.61     | 178.91     | 163.27     | 18.58           | 0.0261  | 0.02  | 0.04  | 0.02  |
| 19.58                     | 188.39                | 166.84     | 175.80     | 162.07     | 19.58           | 0.0084  | 0.03  | 0.02  | 0.01  |
| 20.58                     | 190.92                | 166.28     | 178.13     | 164.14     | 20.58           | 0.0219  | 0.02  | 0.03  | 0.02  |
| 21.58                     | 192.44                | 166.96     | 174.07     | 163.74     | 21.58           | 0.0300  | 0.03  | 0.01  | 0.02  |
| 22.58                     | 194.04                | 168.28     | 175.12     | 166.15     | 22.58           | 0.0386  | 0.04  | 0.01  | 0.04  |
| 23.58                     | 192.74                | 168.68     | 177.19     | 165.89     | 23.58           | 0.0316  | 0.04  | 0.03  | 0.03  |
| 24.58                     | 198.18                | 169.39     | 176.56     | 166.00     | 24.58           | 0.0608  | 0.04  | 0.02  | 0.03  |
| 25.58                     | 192.75                | 167.49     | 178.39     | 164.88     | 25.58           | 0.0317  | 0.03  | 0.03  | 0.03  |
| 26.58                     | 199.04                | 173.12     | 183.74     | 169.26     | 26.58           | 0.0654  | 0.07  | 0.06  | 0.06  |
| 27.58                     | 203.44                | 175.39     | 184.60     | 172.37     | 27.58           | 0.0889  | 0.08  | 0.07  | 0.07  |
| 28.56                     | 214.77                | 185.02     | 196.95     | 182.21     | 28.56           | 0.1496  | 0.14  | 0.14  | 0.14  |
| 29.61                     | 224.88                | 193.80     | 208.17     | 193.38     | 29.61           | 0.2037  | 0.19  | 0.21  | 0.21  |
| 30.56                     | 245.94                | 210.47     | 229.44     | 208.46     | 30.56           | 0.3164  | 0.30  | 0.33  | 0.30  |
| 31.63                     | 259.83                | 220.29     | 243.32     | 218.17     | 31.63           | 0.3907  | 0.36  | 0.41  | 0.36  |
| 32.63                     | 289.96                | 243.89     | 268.90     | 242.50     | 32.63           | 0.5520  | 0.50  | 0.56  | 0.51  |
| 33.63                     | 306.76                | 254.71     | 282.63     | 248.89     | 33.63           | 0.6419  | 0.57  | 0.64  | 0.55  |
| 34.63                     | 321.05                | 270.56     | 304.70     | 267.59     | 34.63           | 0.7184  | 0.67  | 0.76  | 0.67  |
| 35.63                     | 348.60                | 290.13     | 326.13     | 289.79     | 35.63           | 0.8659  | 0.79  | 0.89  | 0.81  |
| 36.63                     | 366.62                | 303.10     | 341.56     | 302.96     | 36.63           | 0.9623  | 0.87  | 0.98  | 0.89  |
| 37.65                     | 383.65                | 319.45     | 362.16     | 314.65     | 37.65           | 1.0535  | 0.97  | 1.10  | 0.96  |
| 38.65                     | 399.62                | 331.47     | 375.03     | 326.24     | 38.65           | 1.1390  | 1.04  | 1.17  | 1.03  |
| 39.65                     | 416.54                | 341.76     | 387.55     | 339.57     | 39.65           | 1.2295  | 1.10  | 1.24  | 1.12  |
| <b>Parameter</b>          |                       |            |            |            |                 |         |       |       |       |
| <b>a</b>                  | 255.483300            | 202.213100 | 234.644200 | 197.649600 |                 |         |       |       |       |
| <b>b</b>                  | 2.766300              | 2.799000   | 2.600800   | 2.721000   |                 |         |       |       |       |
| <b>x0</b>                 | 34.115800             | 34.117400  | 33.905200  | 34.000900  |                 |         |       |       |       |
| <b>y0</b>                 | 186.829400            | 162.373900 | 172.714600 | 160.427800 |                 |         |       |       |       |
| <b>R</b>                  | 0.998317              | 0.998370   | 0.998453   | 0.998613   |                 |         |       |       |       |
| <b>CP<sub>(SDM)</sub></b> | 30.47                 | 30.43      | 30.48      | 30.42      |                 |         |       |       |       |

| Well /<br>Cycle           | C6     | C7     | C8     | C9     | Well /<br>Cycle | luorescence Data Normalized To Y | C6    | C7    | C8    | C9 |
|---------------------------|--------|--------|--------|--------|-----------------|----------------------------------|-------|-------|-------|----|
| 0.56                      | 99.47  | 93.62  | 88.73  | 81.11  | 0.56            | -0.04                            | -0.02 | -0.02 | -0.03 |    |
| 1.56                      | 103.47 | 93.83  | 88.86  | 82.13  | 1.56            | -0.01                            | -0.01 | -0.02 | -0.02 |    |
| 2.56                      | 103.43 | 93.22  | 90.3   | 81.76  | 2.56            | -0.01                            | -0.02 | 0.00  | -0.02 |    |
| 3.56                      | 103.68 | 94.05  | 89.81  | 83.14  | 3.56            | 0.00                             | -0.01 | -0.01 | -0.01 |    |
| 4.56                      | 102.84 | 93.76  | 89.09  | 83.53  | 4.56            | -0.01                            | -0.01 | -0.01 | 0.00  |    |
| 5.56                      | 104.25 | 94.37  | 88.59  | 83.48  | 5.56            | 0.00                             | -0.01 | -0.02 | 0.00  |    |
| 6.56                      | 104.81 | 93.37  | 90.4   | 84.55  | 6.56            | 0.01                             | -0.02 | 0.00  | 0.01  |    |
| 7.56                      | 104.57 | 94.86  | 91.34  | 83.71  | 7.56            | 0.00                             | 0.00  | 0.01  | 0.00  |    |
| 8.56                      | 104.19 | 95.7   | 90.79  | 83.8   | 8.56            | 0.00                             | 0.01  | 0.01  | 0.00  |    |
| 9.56                      | 104.92 | 96.01  | 91.57  | 84.11  | 9.56            | 0.01                             | 0.01  | 0.01  | 0.00  |    |
| 10.56                     | 104.67 | 96.28  | 91.9   | 83.99  | 10.56           | 0.01                             | 0.01  | 0.02  | 0.00  |    |
| 11.56                     | 105.92 | 97.4   | 90.98  | 83.65  | 11.56           | 0.02                             | 0.02  | 0.01  | 0.00  |    |
| 12.56                     | 104.88 | 96.2   | 91.66  | 85.22  | 12.56           | 0.01                             | 0.01  | 0.01  | 0.02  |    |
| 13.56                     | 106.12 | 95.22  | 90.83  | 83.68  | 13.56           | 0.02                             | 0.00  | 0.01  | 0.00  |    |
| 14.56                     | 104.3  | 95.2   | 89.32  | 85.33  | 14.56           | 0.00                             | 0.00  | -0.01 | 0.02  |    |
| 15.56                     | 105.12 | 96.71  | 91.59  | 84.38  | 15.56           | 0.01                             | 0.02  | 0.01  | 0.01  |    |
| 16.58                     | 105.6  | 96.29  | 90.93  | 86.01  | 16.58           | 0.01                             | 0.01  | 0.01  | 0.03  |    |
| 17.58                     | 105.41 | 96.76  | 91.57  | 84.6   | 17.58           | 0.01                             | 0.02  | 0.01  | 0.01  |    |
| 18.58                     | 105.07 | 96.84  | 91.11  | 85.02  | 18.58           | 0.01                             | 0.02  | 0.01  | 0.01  |    |
| 19.58                     | 105.34 | 96.3   | 91.37  | 85.93  | 19.58           | 0.01                             | 0.01  | 0.01  | 0.02  |    |
| 20.58                     | 104.87 | 96.79  | 91.67  | 85.43  | 20.58           | 0.01                             | 0.02  | 0.01  | 0.02  |    |
| 21.58                     | 108.12 | 97.78  | 92.61  | 85.74  | 21.58           | 0.04                             | 0.03  | 0.03  | 0.02  |    |
| 22.58                     | 107.52 | 97.45  | 93.09  | 86.26  | 22.58           | 0.03                             | 0.02  | 0.03  | 0.03  |    |
| 23.58                     | 108.91 | 100.59 | 92.22  | 86.21  | 23.58           | 0.05                             | 0.06  | 0.02  | 0.03  |    |
| 24.58                     | 109.16 | 100.09 | 94.04  | 87.66  | 24.58           | 0.05                             | 0.05  | 0.04  | 0.05  |    |
| 25.58                     | 111.07 | 100.93 | 96.83  | 87.98  | 25.58           | 0.07                             | 0.06  | 0.07  | 0.05  |    |
| 26.58                     | 114.24 | 103.98 | 97.2   | 91.87  | 26.58           | 0.10                             | 0.09  | 0.08  | 0.10  |    |
| 27.58                     | 117.96 | 108.46 | 101.7  | 93.65  | 27.58           | 0.13                             | 0.14  | 0.13  | 0.12  |    |
| 28.56                     | 124.24 | 111.94 | 108.76 | 96.45  | 28.56           | 0.19                             | 0.18  | 0.20  | 0.15  |    |
| 29.61                     | 136.66 | 120.92 | 117.52 | 103.75 | 29.61           | 0.31                             | 0.27  | 0.30  | 0.24  |    |
| 30.56                     | 148.29 | 133.7  | 125.76 | 115.32 | 30.56           | 0.42                             | 0.41  | 0.39  | 0.38  |    |
| 31.63                     | 166.89 | 149    | 142.61 | 126.16 | 31.63           | 0.60                             | 0.57  | 0.58  | 0.50  |    |
| 32.63                     | 184.76 | 164.03 | 158.95 | 137.93 | 32.63           | 0.77                             | 0.72  | 0.76  | 0.64  |    |
| 33.63                     | 205.11 | 183.17 | 177.34 | 154.63 | 33.63           | 0.97                             | 0.93  | 0.96  | 0.84  |    |
| 34.63                     | 227.33 | 197.61 | 196.45 | 168.66 | 34.63           | 1.18                             | 1.08  | 1.17  | 1.01  |    |
| 35.63                     | 244.47 | 211.79 | 209.25 | 179.78 | 35.63           | 1.35                             | 1.23  | 1.32  | 1.14  |    |
| 36.63                     | 258.45 | 227.33 | 227.01 | 195.37 | 36.63           | 1.48                             | 1.39  | 1.51  | 1.33  |    |
| 37.65                     | 276.3  | 239.57 | 238.54 | 207.77 | 37.65           | 1.65                             | 1.52  | 1.64  | 1.48  |    |
| 38.65                     | 293.05 | 252.54 | 249.8  | 212.91 | 38.65           | 1.82                             | 1.65  | 1.77  | 1.54  |    |
| 39.65                     | 307.98 | 263.76 | 263.4  | 226.2  | 39.65           | 1.96                             | 1.77  | 1.92  | 1.70  |    |
| <b>Parameter</b>          |        |        |        |        |                 |                                  |       |       |       |    |
| <b>a</b>                  | 225.64 | 185.31 | 187.83 | 156.33 |                 |                                  |       |       |       |    |
| <b>b</b>                  | 2.657  | 2.6254 | 2.5245 | 2.5676 |                 |                                  |       |       |       |    |
| <b>x0</b>                 | 34.285 | 34.1   | 34.1   | 34.263 |                 |                                  |       |       |       |    |
| <b>y0</b>                 | 104.1  | 95.134 | 90.329 | 83.856 |                 |                                  |       |       |       |    |
| <b>R</b>                  | 0.9995 | 0.9995 | 0.9996 | 0.9994 |                 |                                  |       |       |       |    |
| <b>CP<sub>(SDM)</sub></b> | 30.79  | 30.64  | 30.77  | 30.88  |                 |                                  |       |       |       |    |

| C6           |                             |                             | C7           |                             |                             |              |
|--------------|-----------------------------|-----------------------------|--------------|-----------------------------|-----------------------------|--------------|
| Well / Cycle | FAM Normalized Fluorescence | VIC Normalized Fluorescence | Well / Cycle | FAM Normalized Fluorescence | VIC Normalized Fluorescence | Well / Cycle |
| 0.56         | -0.057857061                | -0.044440666                | 0.56         | -0.058592545                | -0.015916463                | 0.56         |
| 1.56         | -0.042602503                | -0.006014635                | 1.56         | -0.03697577                 | -0.013709055                | 1.56         |
| 2.56         | -0.010434118                | -0.006398895                | 2.56         | -0.017452928                | -0.02012105                 | 2.56         |
| 3.56         | -0.027133845                | -0.003997268                | 3.56         | -0.022872518                | -0.011396532                | 3.56         |
| 4.56         | 0.000699033                 | -0.012066734                | 4.56         | -0.004581401                | -0.014444858                | 4.56         |
| 5.56         | -0.025474577                | 0.001478442                 | 5.56         | -0.014188857                | -0.008032863                | 5.56         |
| 6.56         | 0.01076169                  | 0.006858086                 | 6.56         | -0.000701467                | -0.01854433                 | 6.56         |
| 7.56         | -0.003743522                | 0.004552524                 | 7.56         | 0.00065343                  | -0.002882244                | 7.56         |
| 8.56         | 0.020663771                 | 0.000902051                 | 8.56         | 0.001022948                 | 0.005947388                 | 8.56         |
| 9.56         | 0.004392242                 | 0.007914802                 | 9.56         | 0.0021315                   | 0.009205943                 | 9.56         |
| 10.56        | 0.005409213                 | 0.005513175                 | 10.56        | 0.023378757                 | 0.012044039                 | 10.56        |
| 11.56        | 0.016756463                 | 0.01752131                  | 11.56        | -0.000578295                | 0.023816882                 | 11.56        |
| 12.56        | 0.017077612                 | 0.007530541                 | 12.56        | 0.013648129                 | 0.011203121                 | 12.56        |
| 13.56        | 0.006533233                 | 0.019442611                 | 13.56        | 0.006380952                 | 0.000901884                 | 13.56        |
| 14.56        | 0.021199019                 | 0.001958767                 | 14.56        | 0.023378757                 | 0.000691655                 | 14.56        |
| 15.56        | 0.016060641                 | 0.009836103                 | 15.56        | 0.017404891                 | 0.01656397                  | 15.56        |
| 16.58        | 0.01750581                  | 0.014447227                 | 16.58        | 0.01611158                  | 0.012149154                 | 16.58        |
| 17.58        | 0.019914425                 | 0.012621991                 | 17.58        | 0.024056206                 | 0.017089543                 | 17.58        |
| 18.58        | 0.026069773                 | 0.009355778                 | 18.58        | 0.019929927                 | 0.01793046                  | 18.58        |
| 19.58        | 0.008353075                 | 0.011949535                 | 19.58        | 0.027505036                 | 0.012254268                 | 19.58        |
| 20.58        | 0.021894841                 | 0.007434476                 | 20.58        | 0.024056206                 | 0.017404887                 | 20.58        |
| 21.58        | 0.030030605                 | 0.038655627                 | 21.58        | 0.028244071                 | 0.027811239                 | 21.58        |
| 22.58        | 0.038594568                 | 0.032891722                 | 22.58        | 0.036373457                 | 0.024342455                 | 22.58        |
| 23.58        | 0.031636348                 | 0.046244768                 | 23.58        | 0.038836907                 | 0.057348461                 | 23.58        |
| 24.58        | 0.060753821                 | 0.048646395                 | 24.58        | 0.043209531                 | 0.052092728                 | 24.58        |
| 25.58        | 0.031689873                 | 0.066994825                 | 25.58        | 0.031508143                 | 0.06092236                  | 25.58        |
| 26.58        | 0.065356951                 | 0.097447455                 | 26.58        | 0.066181203                 | 0.092982334                 | 26.58        |
| 27.58        | 0.088907849                 | 0.133183664                 | 27.58        | 0.080161282                 | 0.140073706                 | 27.58        |
| 28.56        | 0.149551409                 | 0.193512533                 | 28.56        | 0.139468843                 | 0.176653611                 | 28.56        |
| 29.61        | 0.203664948                 | 0.31282536                  | 29.61        | 0.193541573                 | 0.271046585                 | 29.61        |
| 30.56        | 0.316388106                 | 0.424549047                 | 30.56        | 0.296205856                 | 0.405383132                 | 30.56        |
| 31.63        | 0.390734007                 | 0.603230092                 | 31.63        | 0.356683556                 | 0.566208577                 | 31.63        |
| 32.63        | 0.552004128                 | 0.774898387                 | 32.63        | 0.502027112                 | 0.724195925                 | 32.63        |
| 33.63        | 0.641925735                 | 0.970390822                 | 33.63        | 0.568663437                 | 0.925385403                 | 33.63        |
| 34.63        | 0.718412627                 | 1.183847426                 | 34.63        | 0.666277647                 | 1.077170986                 | 34.63        |
| 35.63        | 0.865873358                 | 1.34850297                  | 35.63        | 0.786801943                 | 1.226223587                 | 35.63        |
| 36.63        | 0.962324987                 | 1.482801949                 | 36.63        | 0.866679312                 | 1.389571784                 | 36.63        |
| 37.65        | 1.053477665                 | 1.654278114                 | 37.65        | 0.967372835                 | 1.518232139                 | 37.65        |
| 38.65        | 1.138956717                 | 1.81518712                  | 38.65        | 1.041399511                 | 1.654565866                 | 38.65        |
| 39.65        | 1.229520621                 | 1.958612282                 | 39.65        | 1.104771764                 | 1.772504525                 | 39.65        |

| Experiment derived linear regression |            |
|--------------------------------------|------------|
| parameter                            | value      |
| y0                                   | 0.0105     |
| a                                    | 0.6651     |
| R                                    | 0.99550803 |

| Experiment derived linear regression |            |
|--------------------------------------|------------|
| parameter                            | value      |
| y0                                   | 0.022      |
| a                                    | 0.6178     |
| R                                    | 0.99158714 |

| Experiment derived linear regression |       |
|--------------------------------------|-------|
| parameter                            | value |
| y0                                   |       |
| a                                    |       |
| R                                    |       |

| C8                          |                             |              | C9                          |                             |  |
|-----------------------------|-----------------------------|--------------|-----------------------------|-----------------------------|--|
| FAM Normalized Fluorescence | VIC Normalized Fluorescence | Well / Cycle | FAM Normalized Fluorescence | VIC Normalized Fluorescence |  |
| -0.047966993                | -0.017701956                | 0.56         | -0.045489622                | -0.032746613                |  |
| -0.024691601                | -0.016262773                | 1.56         | -0.017314954                | -0.020582904                |  |
| -0.034244934                | -0.000321049                | 2.56         | -0.021179621                | -0.02499523                 |  |
| -0.010911643                | -0.005745663                | 3.56         | -0.00341462                 | -0.008538447                |  |
| 0.000494457                 | -0.013716525                | 4.56         | -0.001295287                | -0.003887617                |  |
| -0.016817339                | -0.019251846                | 5.56         | 0.001385047                 | -0.004483877                |  |
| 0.021569688                 | 0.000786016                 | 6.56         | 0.011046714                 | 0.008276092                 |  |
| 0.002405124                 | 0.011192419                 | 7.56         | -0.00883762                 | -0.00174108                 |  |
| -0.00309528                 | 0.005103566                 | 8.56         | 0.015846381                 | -0.000667811                |  |
| 0.002868316                 | 0.013738666                 | 9.56         | 0.005312047                 | 0.003029002                 |  |
| 0.020353809                 | 0.017391978                 | 10.56        | 7.60467E-05                 | 0.001597977                 |  |
| 0.013637527                 | 0.007206988                 | 11.56        | 0.004377047                 | -0.002456592                |  |
| 0.003794699                 | 0.014735024                 | 12.56        | 0.020957714                 | 0.01626598                  |  |
| 0.004836881                 | 0.005546392                 | 13.56        | -0.006531287                | -0.002098836                |  |
| 0.048203221                 | -0.011170278                | 14.56        | 0.022640714                 | 0.017577752                 |  |
| 0.017343062                 | 0.013960079                 | 15.56        | 0.00761838                  | 0.006248807                 |  |
| 0.018443143                 | 0.006653456                 | 16.58        | 0.008304047                 | 0.025686892                 |  |
| -0.00535334                 | 0.013738666                 | 17.58        | 0.006995047                 | 0.008872353                 |  |
| 0.035870737                 | 0.008646171                 | 18.58        | 0.017716381                 | 0.013880939                 |  |
| 0.017864153                 | 0.011524538                 | 19.58        | 0.01023638                  | 0.024732875                 |  |
| 0.031354616                 | 0.014845731                 | 20.58        | 0.023139381                 | 0.018770273                 |  |
| 0.007847628                 | 0.025252134                 | 21.58        | 0.020646048                 | 0.022467086                 |  |
| 0.013927022                 | 0.030566042                 | 22.58        | 0.035668382                 | 0.028668193                 |  |
| 0.025912112                 | 0.020934584                 | 23.58        | 0.034047715                 | 0.028071933                 |  |
| 0.022264476                 | 0.041083152                 | 24.58        | 0.034733382                 | 0.04536348                  |  |
| 0.03285999                  | 0.071970242                 | 25.58        | 0.027752048                 | 0.049179546                 |  |
| 0.063835947                 | 0.07606638                  | 26.58        | 0.055054049                 | 0.095568594                 |  |
| 0.068815259                 | 0.125884268                 | 27.58        | 0.074439717                 | 0.116795459                 |  |
| 0.140320506                 | 0.204042998                 | 28.56        | 0.13577572                  | 0.150186033                 |  |
| 0.205283167                 | 0.30102182                  | 29.61        | 0.205402056                 | 0.237240031                 |  |
| 0.328434307                 | 0.392243908                 | 30.56        | 0.299400727                 | 0.375214654                 |  |
| 0.408798098                 | 0.578784222                 | 31.63        | 0.359926397                 | 0.504483877                 |  |
| 0.556903701                 | 0.759678509                 | 32.63        | 0.511583404                 | 0.644843541                 |  |
| 0.636399007                 | 0.963267611                 | 33.63        | 0.551414406                 | 0.843994467                 |  |
| 0.764182067                 | 1.174827575                 | 34.63        | 0.667977745                 | 1.011305094                 |  |
| 0.888259591                 | 1.316531789                 | 35.63        | 0.806357751                 | 1.143913375                 |  |
| 0.977597725                 | 1.513146387                 | 36.63        | 0.888450755                 | 1.329827323                 |  |
| 1.096869633                 | 1.640790887                 | 37.65        | 0.961318425                 | 1.477699866                 |  |
| 1.171385627                 | 1.765446313                 | 38.65        | 1.033562762                 | 1.538995421                 |  |
| 1.243875156                 | 1.916007041                 | 39.65        | 1.116653099                 | 1.697481397                 |  |

| Experiment derived linear regression value |
|--------------------------------------------|
| 0.0085                                     |
| 0.6875                                     |
| 0.99025758                                 |

| Experiment derived linear regression parameter | value      | value  |
|------------------------------------------------|------------|--------|
| y0                                             | 0.0334     | 0.0256 |
| a                                              | 0.6628     | 0.0533 |
| R                                              | 0.98422807 |        |

|    | value  |
|----|--------|
| y0 | 0.0186 |
| a  | 0.6583 |
| R  |        |

| Well /<br>Cycle     | Raw fluorescence data |          |          |          |          | Well /<br>Cycle | D3      | D4    | D5    | D6    | D7    |
|---------------------|-----------------------|----------|----------|----------|----------|-----------------|---------|-------|-------|-------|-------|
|                     | D3                    | D4       | D5       | D6       | D7       |                 |         |       |       |       |       |
| 0.56                | 157.21                | 122.21   | 150.05   | 149.74   | 214.60   | 0.56            | -0.0222 | -0.03 | -0.03 | -0.01 | -0.02 |
| 1.56                | 158.01                | 122.63   | 153.66   | 149.52   | 216.14   | 1.56            | -0.0173 | -0.02 | -0.01 | -0.01 | -0.01 |
| 2.56                | 161.18                | 124.58   | 152.26   | 151.32   | 219.49   | 2.56            | 0.0025  | -0.01 | -0.02 | 0.00  | 0.01  |
| 3.56                | 159.74                | 122.76   | 152.98   | 152.99   | 220.62   | 3.56            | -0.0065 | -0.02 | -0.01 | 0.01  | 0.01  |
| 4.56                | 162.88                | 126.15   | 155.58   | 152.53   | 220.69   | 4.56            | 0.0130  | 0.00  | 0.00  | 0.01  | 0.01  |
| 5.56                | 162.29                | 125.40   | 154.62   | 152.69   | 222.34   | 5.56            | 0.0094  | 0.00  | 0.00  | 0.01  | 0.02  |
| 6.56                | 161.65                | 126.57   | 159.82   | 153.70   | 220.77   | 6.56            | 0.0054  | 0.01  | 0.03  | 0.02  | 0.01  |
| 7.56                | 160.19                | 125.42   | 154.93   | 150.70   | 218.33   | 7.56            | -0.0037 | 0.00  | 0.00  | 0.00  | 0.00  |
| 8.56                | 163.56                | 127.62   | 157.75   | 153.88   | 215.39   | 8.56            | 0.0173  | 0.02  | 0.02  | 0.02  | -0.01 |
| 9.56                | 162.54                | 125.79   | 154.13   | 150.05   | 220.93   | 9.56            | 0.0109  | 0.00  | -0.01 | 0.00  | 0.01  |
| 10.56               | 163.36                | 128.88   | 157.48   | 154.49   | 220.05   | 10.56           | 0.0160  | 0.03  | 0.02  | 0.02  | 0.01  |
| 11.56               | 161.32                | 125.20   | 154.68   | 150.64   | 220.10   | 11.56           | 0.0033  | 0.00  | 0.00  | 0.00  | 0.01  |
| 12.56               | 163.11                | 126.99   | 157.93   | 151.24   | 219.78   | 12.56           | 0.0145  | 0.01  | 0.02  | 0.00  | 0.01  |
| 13.56               | 162.15                | 128.03   | 154.48   | 149.89   | 217.95   | 13.56           | 0.0085  | 0.02  | 0.00  | -0.01 | 0.00  |
| 14.56               | 162.13                | 126.70   | 156.78   | 153.86   | 220.81   | 14.56           | 0.0084  | 0.01  | 0.01  | 0.02  | 0.01  |
| 15.56               | 160.39                | 127.61   | 155.19   | 150.22   | 221.49   | 15.56           | -0.0025 | 0.02  | 0.00  | 0.00  | 0.02  |
| 16.56               | 163.17                | 126.47   | 156.06   | 151.27   | 221.82   | 16.56           | 0.0148  | 0.01  | 0.01  | 0.00  | 0.02  |
| 17.56               | 160.37                | 125.94   | 156.40   | 149.92   | 217.47   | 17.56           | -0.0026 | 0.00  | 0.01  | -0.01 | 0.00  |
| 18.56               | 163.70                | 126.20   | 156.75   | 152.40   | 222.30   | 18.56           | 0.0181  | 0.01  | 0.01  | 0.01  | 0.02  |
| 19.56               | 161.61                | 126.82   | 156.68   | 152.32   | 224.20   | 19.56           | 0.0051  | 0.01  | 0.01  | 0.01  | 0.03  |
| 20.56               | 162.19                | 126.15   | 158.21   | 151.71   | 221.98   | 20.56           | 0.0087  | 0.00  | 0.02  | 0.01  | 0.02  |
| 21.56               | 159.09                | 126.65   | 155.31   | 149.79   | 216.14   | 21.56           | -0.0105 | 0.01  | 0.00  | -0.01 | -0.01 |
| 22.56               | 161.59                | 127.55   | 159.10   | 151.47   | 216.05   | 22.56           | 0.0050  | 0.02  | 0.03  | 0.00  | -0.01 |
| 23.56               | 162.45                | 128.74   | 156.27   | 150.10   | 219.16   | 23.56           | 0.0104  | 0.03  | 0.01  | 0.00  | 0.00  |
| 24.56               | 162.49                | 126.75   | 159.74   | 149.80   | 218.61   | 24.56           | 0.0106  | 0.01  | 0.03  | -0.01 | 0.00  |
| 25.56               | 163.01                | 127.12   | 159.63   | 151.99   | 217.62   | 25.56           | 0.0138  | 0.01  | 0.03  | 0.01  | 0.00  |
| 26.56               | 164.64                | 128.74   | 165.51   | 152.94   | 219.69   | 26.56           | 0.0240  | 0.03  | 0.07  | 0.01  | 0.01  |
| 27.56               | 167.30                | 129.89   | 163.43   | 154.86   | 223.28   | 27.56           | 0.0405  | 0.03  | 0.05  | 0.03  | 0.02  |
| 28.56               | 173.52                | 134.58   | 170.86   | 161.47   | 239.46   | 28.56           | 0.0792  | 0.07  | 0.10  | 0.07  | 0.10  |
| 29.56               | 180.85                | 139.74   | 175.06   | 166.95   | 251.14   | 29.56           | 0.1248  | 0.11  | 0.13  | 0.11  | 0.15  |
| 30.56               | 193.51                | 147.16   | 189.02   | 181.81   | 272.56   | 30.56           | 0.2035  | 0.17  | 0.22  | 0.21  | 0.25  |
| 31.56               | 207.69                | 151.22   | 195.38   | 185.68   | 285.28   | 31.56           | 0.2917  | 0.20  | 0.26  | 0.23  | 0.31  |
| 32.56               | 222.90                | 161.05   | 213.43   | 206.07   | 315.14   | 32.56           | 0.3863  | 0.28  | 0.38  | 0.37  | 0.44  |
| 33.56               | 234.93                | 168.31   | 219.57   | 211.34   | 332.74   | 33.56           | 0.4611  | 0.34  | 0.42  | 0.40  | 0.53  |
| 34.56               | 246.51                | 176.49   | 232.29   | 221.32   | 353.80   | 34.56           | 0.5332  | 0.41  | 0.50  | 0.47  | 0.62  |
| 35.56               | 261.36                | 186.59   | 244.68   | 237.00   | 379.38   | 35.56           | 0.6255  | 0.49  | 0.58  | 0.57  | 0.74  |
| 36.56               | 276.59                | 200.10   | 253.18   | 247.06   | 393.37   | 36.56           | 0.7202  | 0.59  | 0.63  | 0.64  | 0.80  |
| 37.56               | 289.84                | 209.67   | 265.00   | 259.50   | 416.96   | 37.56           | 0.8027  | 0.67  | 0.71  | 0.72  | 0.91  |
| 38.56               | 302.25                | 214.42   | 274.86   | 269.64   | 438.27   | 38.56           | 0.8798  | 0.71  | 0.77  | 0.79  | 1.01  |
| 39.56               | 310.44                | 229.47   | 283.99   | 279.75   | 453.17   | 39.56           | 0.9308  | 0.83  | 0.83  | 0.86  | 1.08  |
| Parameter           |                       |          |          |          |          |                 |         |       |       |       |       |
| a                   | 164.3334              | 127.0203 | 144.3406 | 140.8843 | 252.9196 |                 |         |       |       |       |       |
| b                   | 2.5147                | 2.9348   | 2.8051   | 2.5282   | 2.4510   |                 |         |       |       |       |       |
| x0                  | 34.2529               | 35.7050  | 34.2203  | 34.3940  | 34.1912  |                 |         |       |       |       |       |
| y0                  | 160.7854              | 125.5662 | 155.1217 | 150.7943 | 218.1714 |                 |         |       |       |       |       |
| R                   | 0.9986                | 0.9979   | 0.9982   | 0.9974   | 0.9979   |                 |         |       |       |       |       |
| CP <sub>(SDM)</sub> | 30.94                 | 31.84    | 30.53    | 31.06    | 30.96    |                 |         |       |       |       |       |

| Well /<br>Cycle           | D3     | D4     | D5     | D6     | D7       | Well /<br>Cycle | Fluorescence Data Normalized To Y0 |       |       |       |       |
|---------------------------|--------|--------|--------|--------|----------|-----------------|------------------------------------|-------|-------|-------|-------|
|                           |        |        |        |        |          |                 | D3                                 | D4    | D5    | D6    | D7    |
| 0.56                      | 78.7   | 84.3   | 123.94 | 117.84 | 116.78   | 0.56            | 0.00                               | 0.02  | 0.02  | 0.01  | 0.01  |
| 1.56                      | 79.58  | 82.46  | 124.65 | 122.32 | 120.21   | 1.56            | 0.01                               | 0.00  | 0.03  | 0.05  | 0.03  |
| 2.56                      | 78.97  | 82.95  | 124.51 | 120.71 | 118.4    | 2.56            | 0.01                               | 0.00  | 0.03  | 0.04  | 0.02  |
| 3.56                      | 78.77  | 84.59  | 124.3  | 120.91 | 117.21   | 3.56            | 0.00                               | 0.02  | 0.03  | 0.04  | 0.01  |
| 4.56                      | 79.55  | 83.66  | 125.29 | 122.3  | 119.23   | 4.56            | 0.01                               | 0.01  | 0.04  | 0.05  | 0.03  |
| 5.56                      | 79.26  | 83.53  | 122.45 | 119.67 | 117.59   | 5.56            | 0.01                               | 0.01  | 0.01  | 0.03  | 0.01  |
| 6.56                      | 78.59  | 83.45  | 122.64 | 118.64 | 118.37   | 6.56            | 0.00                               | 0.01  | 0.01  | 0.02  | 0.02  |
| 7.56                      | 79.47  | 84.01  | 125.04 | 120.8  | 119.58   | 7.56            | 0.01                               | 0.02  | 0.03  | 0.04  | 0.03  |
| 8.56                      | 80.06  | 83.26  | 122.11 | 118.33 | 118.54   | 8.56            | 0.02                               | 0.01  | 0.01  | 0.02  | 0.02  |
| 9.56                      | 79.47  | 84.37  | 121.55 | 117.61 | 120.44   | 9.56            | 0.01                               | 0.02  | 0.00  | 0.01  | 0.04  |
| 10.56                     | 80.95  | 83.62  | 123.03 | 116.52 | 116.53   | 10.56           | 0.03                               | 0.01  | 0.02  | 0.00  | 0.00  |
| 11.56                     | 80.96  | 84.22  | 120.15 | 117.26 | 117.22   | 11.56           | 0.03                               | 0.02  | -0.01 | 0.01  | 0.01  |
| 12.56                     | 78.25  | 83.56  | 121.23 | 116.85 | 115.74   | 12.56           | 0.00                               | 0.01  | 0.00  | 0.01  | 0.00  |
| 13.56                     | 79.01  | 83.48  | 122.62 | 115.53 | 118.32   | 13.56           | 0.01                               | 0.01  | 0.01  | -0.01 | 0.02  |
| 14.56                     | 79.78  | 83.68  | 122.71 | 117.02 | 114.43   | 14.56           | 0.02                               | 0.01  | 0.01  | 0.01  | -0.02 |
| 15.56                     | 79.16  | 82.46  | 121.98 | 115.63 | 118.12   | 15.56           | 0.01                               | 0.00  | 0.01  | 0.00  | 0.02  |
| 16.58                     | 78.78  | 83.34  | 121.58 | 115.67 | 119.65   | 16.58           | 0.00                               | 0.01  | 0.00  | 0.00  | 0.03  |
| 17.58                     | 78.18  | 82.93  | 119.28 | 116.74 | 120.57   | 17.58           | 0.00                               | 0.00  | -0.01 | 0.01  | 0.04  |
| 18.58                     | 79.2   | 82.41  | 122.76 | 118.22 | 117.91   | 18.58           | 0.01                               | 0.00  | 0.01  | 0.02  | 0.01  |
| 19.58                     | 79.73  | 83.53  | 121.06 | 114.23 | 113.87   | 19.58           | 0.01                               | 0.01  | 0.00  | -0.02 | -0.02 |
| 20.58                     | 79.14  | 81.98  | 120.42 | 112.74 | 112.33   | 20.58           | 0.01                               | -0.01 | 0.00  | -0.03 | -0.03 |
| 21.58                     | 78.05  | 82.92  | 123.3  | 114.96 | 116.17   | 21.58           | -0.01                              | 0.00  | 0.02  | -0.01 | 0.00  |
| 22.58                     | 79.42  | 83.14  | 123.39 | 115.35 | 116.03   | 22.58           | 0.01                               | 0.01  | 0.02  | -0.01 | 0.00  |
| 23.58                     | 80.15  | 83.13  | 121.82 | 114.25 | 117.69   | 23.58           | 0.02                               | 0.01  | 0.01  | -0.02 | 0.01  |
| 24.58                     | 79.41  | 83.66  | 123.47 | 116.9  | 117.96   | 24.58           | 0.01                               | 0.01  | 0.02  | 0.01  | 0.02  |
| 25.58                     | 81.81  | 85.81  | 130.2  | 121.26 | 121.34   | 25.58           | 0.04                               | 0.04  | 0.08  | 0.04  | 0.04  |
| 26.58                     | 83.93  | 86.86  | 138.64 | 125.42 | 126.82   | 26.58           | 0.07                               | 0.05  | 0.15  | 0.08  | 0.09  |
| 27.58                     | 89.24  | 91.16  | 146.73 | 133.61 | 133.16   | 27.58           | 0.14                               | 0.10  | 0.21  | 0.15  | 0.15  |
| 28.56                     | 95.16  | 96.77  | 161.19 | 145.25 | 145.67   | 28.56           | 0.21                               | 0.17  | 0.33  | 0.25  | 0.25  |
| 29.61                     | 105.72 | 107.47 | 184.3  | 164.23 | 164.28   | 29.61           | 0.35                               | 0.30  | 0.52  | 0.41  | 0.41  |
| 30.56                     | 117.88 | 127.1  | 213.98 | 187.09 | 185.12   | 30.56           | 0.50                               | 0.54  | 0.77  | 0.61  | 0.59  |
| 31.63                     | 136.51 | 147.53 | 255.5  | 222.33 | 223.04   | 31.63           | 0.74                               | 0.79  | 1.11  | 0.91  | 0.92  |
| 32.63                     | 152.86 | 162.67 | 297.98 | 256.24 | 255.57   | 32.63           | 0.95                               | 0.97  | 1.46  | 1.21  | 1.20  |
| 33.63                     | 172.82 | 186.13 | 345.25 | 296.13 | 289.05   | 33.63           | 1.20                               | 1.25  | 1.85  | 1.55  | 1.49  |
| 34.63                     | 187.75 | 204.12 | 385.8  | 329.64 | 323.06   | 34.63           | 1.39                               | 1.47  | 2.19  | 1.84  | 1.78  |
| 35.63                     | 201.92 | 218.62 | 421.53 | 355.8  | 346.19   | 35.63           | 1.57                               | 1.65  | 2.48  | 2.06  | 1.98  |
| 36.63                     | 217.52 | 232.99 | 459.13 | 387.06 | 379.94   | 36.63           | 1.77                               | 1.82  | 2.79  | 2.33  | 2.27  |
| 37.65                     | 231.68 | 249.74 | 489.73 | 415.08 | 408.62   | 37.65           | 1.95                               | 2.02  | 3.05  | 2.57  | 2.52  |
| 38.65                     | 243.59 | 260.42 | 522.51 | 443.12 | 431.05   | 38.65           | 2.10                               | 2.15  | 3.32  | 2.81  | 2.71  |
| 39.65                     | 254.29 | 273.3  | 553.67 | 466.28 | 453.81   | 39.65           | 2.24                               | 2.31  | 3.58  | 3.01  | 2.91  |
| <b>Parameter</b>          |        |        |        |        |          |                 |                                    |       |       |       |       |
| <b>a</b>                  | 185.77 | 196.17 | 458.96 | 369.69 | 358.474  |                 |                                    |       |       |       |       |
| <b>b</b>                  | 2.3968 | 2.2437 | 2.4247 | 2.3526 | 2.3884   |                 |                                    |       |       |       |       |
| <b>x0</b>                 | 33.753 | 33.545 | 33.911 | 33.956 | 33.9367  |                 |                                    |       |       |       |       |
| <b>y0</b>                 | 78.564 | 82.578 | 120.99 | 116.15 | 116.188  |                 |                                    |       |       |       |       |
| <b>R</b>                  | 0.9993 | 0.9989 | 0.9994 | 0.999  | 0.999089 |                 |                                    |       |       |       |       |
| <b>CP<sub>(SDM)</sub></b> | 30.60  | 30.59  | 30.72  | 30.86  | 30.79    |                 |                                    |       |       |       |       |

| D3           |                             |                             | D4           |                             |                             |              |
|--------------|-----------------------------|-----------------------------|--------------|-----------------------------|-----------------------------|--------------|
| Well / Cycle | FAM Normalized Fluorescence | VIC Normalized Fluorescence | Well / Cycle | FAM Normalized Fluorescence | VIC Normalized Fluorescence | Well / Cycle |
| 0.56         | -0.022237094                | 0.001732348                 | 0.56         | -0.02672853                 | 0.020859193                 | 0.56         |
| 1.56         | -0.017261518                | 0.012933421                 | 1.56         | -0.023383681                | -0.001422906                | 1.56         |
| 2.56         | 0.002454203                 | 0.005169041                 | 2.56         | -0.007854024                | 0.004510914                 | 2.56         |
| 3.56         | -0.006501834                | 0.002623342                 | 3.56         | -0.022348371                | 0.024371045                 | 3.56         |
| 4.56         | 0.013027302                 | 0.012551566                 | 4.56         | 0.00464934                  | 0.013108898                 | 4.56         |
| 5.56         | 0.009357815                 | 0.008860304                 | 5.56         | -0.001323605                | 0.011534619                 | 5.56         |
| 6.56         | 0.005377354                 | 0.000332214                 | 6.56         | 0.00799419                  | 0.010565832                 | 6.56         |
| 7.56         | -0.003703073                | 0.011533287                 | 7.56         | -0.001164326                | 0.01734734                  | 7.56         |
| 8.56         | 0.017256542                 | 0.019043097                 | 8.56         | 0.016356312                 | 0.008264963                 | 8.56         |
| 9.56         | 0.010912682                 | 0.011533287                 | 9.56         | 0.001782327                 | 0.021706881                 | 9.56         |
| 10.56        | 0.016012648                 | 0.030371456                 | 10.56        | 0.02639086                  | 0.012624504                 | 10.56        |
| 11.56        | 0.003324929                 | 0.030498741                 | 11.56        | -0.00291639                 | 0.019890406                 | 11.56        |
| 12.56        | 0.01445778                  | -0.003995474                | 12.56        | 0.011339039                 | 0.011897914                 | 12.56        |
| 13.56        | 0.008487089                 | 0.00567818                  | 13.56        | 0.019621522                 | 0.010929127                 | 13.56        |
| 14.56        | 0.0083627                   | 0.01547912                  | 14.56        | 0.0090295                   | 0.013351094                 | 14.56        |
| 15.56        | -0.002459179                | 0.007587454                 | 15.56        | 0.016276673                 | -0.001422906                | 15.56        |
| 16.58        | 0.014830949                 | 0.002750627                 | 16.58        | 0.007197797                 | 0.00923375                  | 16.58        |
| 17.58        | -0.002583568                | -0.004886468                | 17.58        | 0.002976916                 | 0.004268717                 | 17.58        |
| 18.58        | 0.018127268                 | 0.008096594                 | 18.58        | 0.005047537                 | -0.002028398                | 18.58        |
| 19.58        | 0.005128575                 | 0.014842695                 | 19.58        | 0.009985171                 | 0.011534619                 | 19.58        |
| 20.58        | 0.008735868                 | 0.007332884                 | 20.58        | 0.00464934                  | -0.007235627                | 20.58        |
| 21.58        | -0.01054449                 | -0.006541172                | 21.58        | 0.008631304                 | 0.004147619                 | 21.58        |
| 22.58        | 0.005004186                 | 0.010896862                 | 22.58        | 0.015798838                 | 0.006811783                 | 22.58        |
| 23.58        | 0.01035293                  | 0.020188662                 | 23.58        | 0.02527591                  | 0.006690685                 | 23.58        |
| 24.58        | 0.010601709                 | 0.010769577                 | 24.58        | 0.009427696                 | 0.013108898                 | 24.58        |
| 25.58        | 0.013835833                 | 0.041317959                 | 25.58        | 0.012374349                 | 0.039145046                 | 25.58        |
| 26.58        | 0.02397357                  | 0.068302363                 | 26.58        | 0.02527591                  | 0.051860374                 | 26.58        |
| 27.58        | 0.04051736                  | 0.135890657                 | 27.58        | 0.034434426                 | 0.103932669                 | 27.58        |
| 28.56        | 0.079202465                 | 0.211243332                 | 28.56        | 0.071785242                 | 0.17186885                  | 28.56        |
| 29.61        | 0.124791181                 | 0.345656211                 | 29.61        | 0.112879103                 | 0.301444098                 | 29.61        |
| 30.56        | 0.203529674                 | 0.500434678                 | 30.56        | 0.171971438                 | 0.539160183                 | 30.56        |
| 31.63        | 0.291721761                 | 0.73756649                  | 31.63        | 0.20430498                  | 0.786564137                 | 31.63        |
| 32.63        | 0.386319902                 | 0.94567734                  | 32.63        | 0.282590379                 | 0.969907057                 | 32.63        |
| 33.63        | 0.461140128                 | 1.199738048                 | 33.63        | 0.340408486                 | 1.254003815                 | 33.63        |
| 34.63        | 0.533161593                 | 1.389774438                 | 34.63        | 0.405553405                 | 1.471859768                 | 34.63        |
| 35.63        | 0.625520725                 | 1.570137175                 | 35.63        | 0.485989064                 | 1.647452393                 | 35.63        |
| 36.63        | 0.720243256                 | 1.768701656                 | 36.63        | 0.593581712                 | 1.82147074                  | 36.63        |
| 37.65        | 0.802651236                 | 1.948937107                 | 37.65        | 0.66979649                  | 2.024310496                 | 37.65        |
| 38.65        | 0.879834861                 | 2.100533451                 | 38.65        | 0.707625141                 | 2.153643547                 | 38.65        |
| 39.65        | 0.930772321                 | 2.236728319                 | 39.65        | 0.827482236                 | 2.309618237                 | 39.65        |

| Experiment derived linear regression |            |
|--------------------------------------|------------|
| parameter                            | value      |
| y0                                   | -0.0074    |
| a                                    | 0.402      |
| R                                    | 0.99812799 |

| Experiment derived linear regression |            |
|--------------------------------------|------------|
| parameter                            | value      |
| y0                                   | 0.0236     |
| a                                    | 0.2552     |
| R                                    | 0.99270657 |

| Experiment derived linear regression |       |
|--------------------------------------|-------|
| parameter                            | value |
| y0                                   |       |
| a                                    |       |
| R                                    |       |

| D5                             |                                |                 | D6                             |                                | D7                             |                                |
|--------------------------------|--------------------------------|-----------------|--------------------------------|--------------------------------|--------------------------------|--------------------------------|
| FAM Normalized<br>Fluorescence | VIC Normalized<br>Fluorescence | Well /<br>Cycle | FAM Normalized<br>Fluorescence | VIC Normalized<br>Fluorescence | FAM Normalized<br>Fluorescence | VIC Normalized<br>Fluorescence |
| -0.032694974                   | 0.024388954                    | 0.56            | -0.006991644                   | 0.01452919                     | -0.016369698                   | 0.005095191                    |
| -0.009422924                   | 0.030257246                    | 1.56            | -0.008450585                   | 0.0530992                      | -0.009311028                   | 0.034616311                    |
| -0.018448096                   | 0.029100118                    | 2.56            | 0.003486206                    | 0.0392381                      | 0.006043872                    | 0.019038111                    |
| -0.013806579                   | 0.027364426                    | 3.56            | 0.014560895                    | 0.04095998                     | 0.011223286                    | 0.008796089                    |
| 0.002954454                    | 0.035546974                    | 4.56            | 0.011510382                    | 0.05292702                     | 0.011544135                    | 0.026181706                    |
| -0.003234235                   | 0.012073805                    | 5.56            | 0.01257143                     | 0.03028435                     | 0.019106996                    | 0.012066651                    |
| 0.030287832                    | 0.013644193                    | 6.56            | 0.019269296                    | 0.02141669                     | 0.011910819                    | 0.018779908                    |
| -0.001235804                   | 0.033480674                    | 7.56            | -0.000625355                   | 0.04001295                     | 0.000726951                    | 0.029194065                    |
| 0.016943471                    | 0.009263637                    | 8.56            | 0.020462975                    | 0.01874778                     | -0.012748692                   | 0.020243054                    |
| -0.006393045                   | 0.004635124                    | 9.56            | -0.004935863                   | 0.01254903                     | 0.012644187                    | 0.036595862                    |
| 0.015202902                    | 0.016867621                    | 10.56           | 0.024508221                    | 0.00316481                     | 0.008610661                    | 0.002943505                    |
| -0.002847442                   | -0.006936156                   | 11.56           | -0.001023248                   | 0.00953575                     | 0.008839839                    | 0.008882157                    |
| 0.01810385                     | 0.00199026                     | 12.56           | 0.002955682                    | 0.0060059                      | 0.007373102                    | -0.00385582                    |
| -0.004136752                   | 0.013478889                    | 13.56           | -0.005996911                   | -0.0053585                     | -0.001014798                   | 0.018349571                    |
| 0.010690316                    | 0.014222757                    | 14.56           | 0.020330344                    | 0.0074695                      | 0.012094161                    | -0.01513065                    |
| 0.000440299                    | 0.008189161                    | 15.56           | -0.003808499                   | -0.0044975                     | 0.015210976                    | 0.016628223                    |
| 0.006048799                    | 0.00488308                     | 16.58           | 0.003154629                    | -0.0041532                     | 0.016723549                    | 0.029796537                    |
| 0.008240627                    | -0.014126881                   | 17.58           | -0.005797965                   | 0.00505887                     | -0.003214904                   | 0.037714738                    |
| 0.01049692                     | 0.014636017                    | 18.58           | 0.01064828                     | 0.01780075                     | 0.018923654                    | 0.014820808                    |
| 0.010045661                    | 0.000585176                    | 19.58           | 0.010117756                    | -0.0165507                     | 0.027632403                    | -0.019950425                   |
| 0.019908884                    | -0.004704552                   | 20.58           | 0.006072511                    | -0.0293786                     | 0.017456917                    | -0.033204806                   |
| 0.001213886                    | 0.019099225                    | 21.58           | -0.006660066                   | -0.0102658                     | -0.009311028                   | -0.000154921                   |
| 0.025646315                    | 0.019843093                    | 22.58           | 0.004480939                    | -0.0069082                     | -0.009723548                   | -0.001359865                   |
| 0.007402575                    | 0.006866729                    | 23.58           | -0.004604285                   | -0.0163785                     | 0.0045313                      | 0.012927325                    |
| 0.029772108                    | 0.020504309                    | 24.58           | -0.006593751                   | 0.00643637                     | 0.002010346                    | 0.015251145                    |
| 0.029062987                    | 0.076129109                    | 25.58           | 0.007929345                    | 0.04397326                     | -0.002527371                   | 0.044341929                    |
| 0.066968709                    | 0.145887402                    | 26.58           | 0.014229318                    | 0.07978828                     | 0.006960582                    | 0.091506868                    |
| 0.053559882                    | 0.212752874                    | 27.58           | 0.026961894                    | 0.15029909                     | 0.023415535                    | 0.146073605                    |
| 0.101457759                    | 0.332267673                    | 28.56           | 0.070796443                    | 0.25051226                     | 0.097577409                    | 0.253743932                    |
| 0.128533274                    | 0.523276458                    | 29.61           | 0.107137339                    | 0.41391827                     | 0.151113299                    | 0.413915379                    |
| 0.218527131                    | 0.768587609                    | 30.56           | 0.205682178                    | 0.61072866                     | 0.249292987                    | 0.593279857                    |
| 0.259527197                    | 1.111758735                    | 31.63           | 0.231346278                    | 0.91412317                     | 0.307595771                    | 0.919647468                    |
| 0.375887448                    | 1.462864454                    | 32.63           | 0.36656359                     | 1.2060672                      | 0.44446064                     | 1.199624746                    |
| 0.415469273                    | 1.853560483                    | 33.63           | 0.401511861                    | 1.54949532                     | 0.525131158                    | 1.487778428                    |
| 0.497469406                    | 2.188714365                    | 34.63           | 0.467694734                    | 1.8379956                      | 0.621660768                    | 1.780493683                    |
| 0.577342177                    | 2.48402998                     | 35.63           | 0.571677444                    | 2.06321695                     | 0.738908033                    | 1.979567597                    |
| 0.632137863                    | 2.794801519                    | 36.63           | 0.638390841                    | 2.33234612                     | 0.803031928                    | 2.270045099                    |
| 0.7083361                      | 3.047716656                    | 37.65           | 0.720887328                    | 2.57358092                     | 0.911157924                    | 2.516886425                    |
| 0.771899096                    | 3.318649929                    | 38.65           | 0.788131249                    | 2.8149879                      | 1.008833422                    | 2.709935622                    |
| 0.83075611                     | 3.576193578                    | 39.65           | 0.855176224                    | 3.01438111                     | 1.07712835                     | 2.905825042                    |

| parameter | value      |
|-----------|------------|
| y0        | 0.0211     |
| a         | 0.2243     |
| R         | 0.98996287 |

| parameter | value      |        |
|-----------|------------|--------|
| y0        | 0.0022     | 0.0191 |
| a         | 0.2736     | 0.022  |
| R         | 0.98427259 |        |

| parameter | value      |
|-----------|------------|
| y0        | -0.0019    |
| a         | 0.3613     |
| R         | 0.99255245 |

|    | value   | SD2         |
|----|---------|-------------|
| y0 | 0.00752 |             |
| a  | 0.30328 | 0.075070613 |
| R  |         |             |

| Well /<br>Cycle     | Raw fluorescence data |        |        |        |        | Well /<br>Cycle | D8      | D9    | E2    | E3    | E4    |
|---------------------|-----------------------|--------|--------|--------|--------|-----------------|---------|-------|-------|-------|-------|
|                     | D8                    | D9     | E2     | E3     | E4     |                 |         |       |       |       |       |
| 0.56                | 229.79                | 166.54 | 147.23 | 151.65 | 143.84 | 0.56            | -0.0160 | -0.06 | -0.07 | -0.05 | -0.03 |
| 1.56                | 234.43                | 174.87 | 158.92 | 155.48 | 144.53 | 1.56            | 0.0039  | -0.01 | 0.00  | -0.02 | -0.02 |
| 2.56                | 238.66                | 175.23 | 158.08 | 157.91 | 147.90 | 2.56            | 0.0220  | -0.01 | 0.00  | -0.01 | 0.00  |
| 3.56                | 239.02                | 175.30 | 157.37 | 156.41 | 147.93 | 3.56            | 0.0236  | -0.01 | -0.01 | -0.02 | 0.00  |
| 4.56                | 244.07                | 179.69 | 160.11 | 161.38 | 147.96 | 4.56            | 0.0452  | 0.02  | 0.01  | 0.01  | 0.00  |
| 5.56                | 235.61                | 175.75 | 158.80 | 159.87 | 148.03 | 5.56            | 0.0090  | 0.00  | 0.00  | 0.00  | 0.00  |
| 6.56                | 236.15                | 180.40 | 161.36 | 159.18 | 150.77 | 6.56            | 0.0113  | 0.02  | 0.02  | 0.00  | 0.02  |
| 7.56                | 236.34                | 178.76 | 159.38 | 161.40 | 149.22 | 7.56            | 0.0121  | 0.01  | 0.00  | 0.01  | 0.01  |
| 8.56                | 236.87                | 177.07 | 161.02 | 161.21 | 148.00 | 8.56            | 0.0144  | 0.00  | 0.02  | 0.01  | 0.00  |
| 9.56                | 235.72                | 177.13 | 160.73 | 161.61 | 147.15 | 9.56            | 0.0094  | 0.00  | 0.01  | 0.01  | 0.00  |
| 10.56               | 237.70                | 180.82 | 161.45 | 160.83 | 147.02 | 10.56           | 0.0179  | 0.02  | 0.02  | 0.01  | 0.00  |
| 11.56               | 235.63                | 176.26 | 158.99 | 161.74 | 150.19 | 11.56           | 0.0090  | 0.00  | 0.00  | 0.02  | 0.02  |
| 12.56               | 236.49                | 179.37 | 161.01 | 162.17 | 148.99 | 12.56           | 0.0127  | 0.02  | 0.01  | 0.02  | 0.01  |
| 13.56               | 233.80                | 177.21 | 159.39 | 160.74 | 146.20 | 13.56           | 0.0012  | 0.00  | 0.00  | 0.01  | -0.01 |
| 14.56               | 235.92                | 179.68 | 162.03 | 160.91 | 148.11 | 14.56           | 0.0103  | 0.02  | 0.02  | 0.01  | 0.00  |
| 15.56               | 235.19                | 176.24 | 160.42 | 159.74 | 147.22 | 15.56           | 0.0072  | 0.00  | 0.01  | 0.00  | 0.00  |
| 16.58               | 237.17                | 177.93 | 161.21 | 163.17 | 150.59 | 16.58           | 0.0156  | 0.01  | 0.02  | 0.02  | 0.02  |
| 17.58               | 232.87                | 179.06 | 160.02 | 160.83 | 147.18 | 17.58           | -0.0028 | 0.01  | 0.01  | 0.01  | 0.00  |
| 18.58               | 235.20                | 180.17 | 160.73 | 162.22 | 149.58 | 18.58           | 0.0072  | 0.02  | 0.01  | 0.02  | 0.01  |
| 19.58               | 230.79                | 177.00 | 157.65 | 159.21 | 147.53 | 19.58           | -0.0117 | 0.00  | -0.01 | 0.00  | 0.00  |
| 20.58               | 233.26                | 179.70 | 158.53 | 159.67 | 147.95 | 20.58           | -0.0011 | 0.02  | 0.00  | 0.00  | 0.00  |
| 21.58               | 229.08                | 179.26 | 158.14 | 158.55 | 148.83 | 21.58           | -0.0190 | 0.02  | 0.00  | 0.00  | 0.01  |
| 22.58               | 228.90                | 178.09 | 159.38 | 161.34 | 147.68 | 22.58           | -0.0198 | 0.01  | 0.00  | 0.01  | 0.00  |
| 23.58               | 229.51                | 173.77 | 159.50 | 158.24 | 146.69 | 23.58           | -0.0172 | -0.02 | 0.01  | -0.01 | -0.01 |
| 24.58               | 229.24                | 177.29 | 159.93 | 160.55 | 147.51 | 24.58           | -0.0183 | 0.00  | 0.01  | 0.01  | 0.00  |
| 25.58               | 227.46                | 177.63 | 160.11 | 162.22 | 150.85 | 25.58           | -0.0259 | 0.01  | 0.01  | 0.02  | 0.02  |
| 26.58               | 233.10                | 180.12 | 161.29 | 163.04 | 151.56 | 26.58           | -0.0018 | 0.02  | 0.02  | 0.02  | 0.03  |
| 27.58               | 234.86                | 179.48 | 164.53 | 162.88 | 150.37 | 27.58           | 0.0057  | 0.02  | 0.04  | 0.02  | 0.02  |
| 28.56               | 244.67                | 187.58 | 169.40 | 172.19 | 156.64 | 28.56           | 0.0478  | 0.06  | 0.07  | 0.08  | 0.06  |
| 29.61               | 252.20                | 195.32 | 175.03 | 175.45 | 160.95 | 29.61           | 0.0800  | 0.11  | 0.10  | 0.10  | 0.09  |
| 30.56               | 278.36                | 207.51 | 189.04 | 188.61 | 167.57 | 30.56           | 0.1920  | 0.18  | 0.19  | 0.18  | 0.14  |
| 31.63               | 287.09                | 214.19 | 191.18 | 194.93 | 170.62 | 31.63           | 0.2294  | 0.21  | 0.21  | 0.22  | 0.16  |
| 32.63               | 318.96                | 226.29 | 206.59 | 211.39 | 182.55 | 32.63           | 0.3659  | 0.28  | 0.30  | 0.33  | 0.24  |
| 33.63               | 323.18                | 237.01 | 214.12 | 221.34 | 187.88 | 33.63           | 0.3840  | 0.34  | 0.35  | 0.39  | 0.27  |
| 34.63               | 343.89                | 244.83 | 222.84 | 231.47 | 196.45 | 34.63           | 0.4726  | 0.39  | 0.40  | 0.45  | 0.33  |
| 35.63               | 365.56                | 259.15 | 236.77 | 249.35 | 205.72 | 35.63           | 0.5654  | 0.47  | 0.49  | 0.57  | 0.39  |
| 36.63               | 380.43                | 268.89 | 247.20 | 259.35 | 214.15 | 36.63           | 0.6291  | 0.52  | 0.56  | 0.63  | 0.45  |
| 37.65               | 398.66                | 278.77 | 255.82 | 270.32 | 221.22 | 37.65           | 0.7072  | 0.58  | 0.61  | 0.70  | 0.50  |
| 38.65               | 412.36                | 292.86 | 264.57 | 282.04 | 226.83 | 38.65           | 0.7659  | 0.66  | 0.67  | 0.77  | 0.54  |
| 39.65               | 428.59                | 304.25 | 274.51 | 290.61 | 235.06 | 39.65           | 0.8354  | 0.72  | 0.73  | 0.82  | 0.59  |
| a                   | 202.27                | 143.91 | 127.79 | 145.25 | 97.72  |                 |         |       |       |       |       |
| b                   | 2.24                  | 2.75   | 2.63   | 2.52   | 2.64   |                 |         |       |       |       |       |
| x0                  | 34.06                 | 34.74  | 34.38  | 34.45  | 34.55  |                 |         |       |       |       |       |
| y0                  | 233.52                | 176.50 | 158.64 | 159.28 | 147.53 |                 |         |       |       |       |       |
| R                   | 1.00                  | 1.00   | 1.00   | 1.00   | 1.00   |                 |         |       |       |       |       |
| CP <sub>(SDM)</sub> | 31.10                 | 31.12  | 30.92  | 31.14  | 31.07  |                 |         |       |       |       |       |

| Well /<br>Cycle     |        |        |        |        |        | Well /<br>Cycle | Fluorescence Data Normalized To Y0 |       |       |       |       |
|---------------------|--------|--------|--------|--------|--------|-----------------|------------------------------------|-------|-------|-------|-------|
|                     | D8     | D9     | E2     | E3     | E4     |                 | D8                                 | D9    | E2    | E3    | E4    |
| 0.56                | 126.48 | 107.73 | 77.35  | 81.84  | 95.76  | 0.56            | 0.09                               | 0.04  | -0.05 | 0.04  | -0.01 |
| 1.56                | 127.66 | 109.64 | 80.67  | 82.58  | 97.44  | 1.56            | 0.10                               | 0.06  | -0.01 | 0.05  | 0.01  |
| 2.56                | 122.9  | 104.99 | 81.64  | 80.87  | 97.13  | 2.56            | 0.06                               | 0.02  | 0.01  | 0.02  | 0.00  |
| 3.56                | 122.96 | 108.51 | 81.82  | 80.26  | 96.98  | 3.56            | 0.06                               | 0.05  | 0.01  | 0.02  | 0.00  |
| 4.56                | 122.54 | 107.26 | 80.77  | 80.42  | 98.35  | 4.56            | 0.06                               | 0.04  | 0.00  | 0.02  | 0.02  |
| 5.56                | 116.28 | 106.61 | 82.24  | 80.13  | 98.22  | 5.56            | 0.00                               | 0.03  | 0.01  | 0.02  | 0.01  |
| 6.56                | 117.12 | 104.13 | 81.97  | 78.89  | 96.52  | 6.56            | 0.01                               | 0.01  | 0.01  | 0.00  | 0.00  |
| 7.56                | 118.81 | 107.69 | 81.47  | 79.48  | 97.74  | 7.56            | 0.03                               | 0.04  | 0.00  | 0.01  | 0.01  |
| 8.56                | 121.07 | 104.28 | 82.09  | 79.11  | 97.92  | 8.56            | 0.05                               | 0.01  | 0.01  | 0.00  | 0.01  |
| 9.56                | 122.44 | 109.15 | 82.82  | 79.38  | 98.03  | 9.56            | 0.06                               | 0.06  | 0.02  | 0.01  | 0.01  |
| 10.56               | 117.4  | 105.78 | 81.95  | 78.49  | 97.46  | 10.56           | 0.01                               | 0.02  | 0.01  | -0.01 | 0.01  |
| 11.56               | 117.63 | 105.54 | 81.62  | 79.48  | 96.83  | 11.56           | 0.02                               | 0.02  | 0.01  | 0.01  | 0.00  |
| 12.56               | 117.56 | 104.75 | 81.5   | 79.38  | 97.23  | 12.56           | 0.02                               | 0.01  | 0.00  | 0.01  | 0.00  |
| 13.56               | 117.45 | 104    | 81.58  | 78.61  | 98.11  | 13.56           | 0.01                               | 0.01  | 0.01  | 0.00  | 0.01  |
| 14.56               | 114.74 | 102.09 | 82.54  | 79.24  | 99.06  | 14.56           | -0.01                              | -0.01 | 0.02  | 0.00  | 0.02  |
| 15.56               | 115.24 | 104.2  | 82.91  | 78.95  | 99.51  | 15.56           | 0.00                               | 0.01  | 0.02  | 0.00  | 0.03  |
| 16.58               | 115.06 | 99.62  | 82.11  | 77.48  | 97.05  | 16.58           | -0.01                              | -0.04 | 0.01  | -0.02 | 0.00  |
| 17.58               | 112.19 | 102.09 | 82.4   | 78.13  | 97.91  | 17.58           | -0.03                              | -0.01 | 0.02  | -0.01 | 0.01  |
| 18.58               | 115    | 104.23 | 82.32  | 79.18  | 97.82  | 18.58           | -0.01                              | 0.01  | 0.01  | 0.00  | 0.01  |
| 19.58               | 111.5  | 103.89 | 82.63  | 78.9   | 98.82  | 19.58           | -0.04                              | 0.01  | 0.02  | 0.00  | 0.02  |
| 20.58               | 114.34 | 102.37 | 82.7   | 79.62  | 96.95  | 20.58           | -0.01                              | -0.01 | 0.02  | 0.01  | 0.00  |
| 21.58               | 112.36 | 101.49 | 82.58  | 79.33  | 98.31  | 21.58           | -0.03                              | -0.02 | 0.02  | 0.01  | 0.01  |
| 22.58               | 107.8  | 99.97  | 83.05  | 78.35  | 98.43  | 22.58           | -0.07                              | -0.03 | 0.02  | -0.01 | 0.02  |
| 23.58               | 116.73 | 103.35 | 83.97  | 80.32  | 99.59  | 23.58           | 0.01                               | 0.00  | 0.03  | 0.02  | 0.03  |
| 24.58               | 115.46 | 105.01 | 85.53  | 79.99  | 100.47 | 24.58           | 0.00                               | 0.02  | 0.05  | 0.01  | 0.04  |
| 25.58               | 120.62 | 108.74 | 86.86  | 81.69  | 104.95 | 25.58           | 0.04                               | 0.05  | 0.07  | 0.04  | 0.08  |
| 26.58               | 121.55 | 109.46 | 89.15  | 83.54  | 107.69 | 26.58           | 0.05                               | 0.06  | 0.10  | 0.06  | 0.11  |
| 27.58               | 135.31 | 121.35 | 93.89  | 87.41  | 113.51 | 27.58           | 0.17                               | 0.17  | 0.16  | 0.11  | 0.17  |
| 28.56               | 152.56 | 130.17 | 101.95 | 92.9   | 122.57 | 28.56           | 0.32                               | 0.26  | 0.26  | 0.18  | 0.27  |
| 29.61               | 178.31 | 155.91 | 112.88 | 103.04 | 135.1  | 29.61           | 0.54                               | 0.51  | 0.39  | 0.31  | 0.39  |
| 30.56               | 210.34 | 181.25 | 125.3  | 113.26 | 155.97 | 30.56           | 0.82                               | 0.75  | 0.54  | 0.44  | 0.61  |
| 31.63               | 259.26 | 211.59 | 144.22 | 130.1  | 177.57 | 31.63           | 1.24                               | 1.05  | 0.78  | 0.65  | 0.83  |
| 32.63               | 300.17 | 241.04 | 161.75 | 145.83 | 195.42 | 32.63           | 1.59                               | 1.33  | 0.99  | 0.85  | 1.02  |
| 33.63               | 353.5  | 281.14 | 177.67 | 164.72 | 221.34 | 33.63           | 2.05                               | 1.72  | 1.19  | 1.09  | 1.28  |
| 34.63               | 396.2  | 314.24 | 194.93 | 180.56 | 242.78 | 34.63           | 2.42                               | 2.04  | 1.40  | 1.29  | 1.51  |
| 35.63               | 431.77 | 339.9  | 206.39 | 193.19 | 259.78 | 35.63           | 2.73                               | 2.29  | 1.54  | 1.45  | 1.68  |
| 36.63               | 472.63 | 366.88 | 220.28 | 208.07 | 274.96 | 36.63           | 3.08                               | 2.55  | 1.72  | 1.64  | 1.84  |
| 37.65               | 505.36 | 395.4  | 237.16 | 221.83 | 292.1  | 37.65           | 3.37                               | 2.83  | 1.92  | 1.81  | 2.02  |
| 38.65               | 540.54 | 423.56 | 246.93 | 232.66 | 308.39 | 38.65           | 3.67                               | 3.10  | 2.04  | 1.95  | 2.18  |
| 39.65               | 565.24 | 437.01 | 260.25 | 242.4  | 323.22 | 39.65           | 3.88                               | 3.23  | 2.21  | 2.07  | 2.34  |
| <b>Parameter</b>    |        |        |        |        |        |                 |                                    |       |       |       |       |
| a                   | 468.23 | 353.25 | 190.81 | 172.86 | 238.75 |                 |                                    |       |       |       |       |
| b                   | 2.2527 | 2.3392 | 2.5808 | 2.3386 | 2.5107 |                 |                                    |       |       |       |       |
| x0                  | 33.729 | 33.75  | 33.684 | 33.833 | 33.558 |                 |                                    |       |       |       |       |
| y0                  | 115.75 | 103.34 | 81.133 | 78.911 | 96.868 |                 |                                    |       |       |       |       |
| R                   | 0.9987 | 0.9989 | 0.9992 | 0.9993 | 0.9993 |                 |                                    |       |       |       |       |
| CP <sub>(SDM)</sub> | 30.76  | 30.67  | 30.29  | 30.75  | 30.25  |                 |                                    |       |       |       |       |

| D8           |                             |                             | D9           |                             |                             | E2           |                             |
|--------------|-----------------------------|-----------------------------|--------------|-----------------------------|-----------------------------|--------------|-----------------------------|
| Well / Cycle | FAM Normalized Fluorescence | VIC Normalized Fluorescence | Well / Cycle | FAM Normalized Fluorescence | VIC Normalized Fluorescence | Well / Cycle | FAM Normalized Fluorescence |
| 0.56         | -0.015966615                | 0.092687512                 | 0.56         | -0.056447702                | 0.042443806                 | 0.56         | -0.071915662                |
| 1.56         | 0.003903331                 | 0.102881782                 | 1.56         | -0.00925309                 | 0.060925823                 | 1.56         | 0.001773843                 |
| 2.56         | 0.022017528                 | 0.061759134                 | 2.56         | -0.007213467                | 0.015930337                 | 2.56         | -0.003521211                |
| 3.56         | 0.023559161                 | 0.062277486                 | 3.56         | -0.006816874                | 0.049991436                 | 3.56         | -0.007996793                |
| 4.56         | 0.045184857                 | 0.058649017                 | 4.56         | 0.018055197                 | 0.037895876                 | 4.56         | 0.00927517                  |
| 5.56         | 0.008956464                 | 0.004567551                 | 5.56         | -0.004267345                | 0.031606184                 | 5.56         | 0.001017407                 |
| 6.56         | 0.011268914                 | 0.011824489                 | 6.56         | 0.022077787                 | 0.007608592                 | 6.56         | 0.017154715                 |
| 7.56         | 0.012082554                 | 0.026424757                 | 7.56         | 0.01278617                  | 0.042056749                 | 7.56         | 0.004673516                 |
| 8.56         | 0.014352182                 | 0.045949376                 | 8.56         | 0.003211273                 | 0.009060059                 | 8.56         | 0.015011479                 |
| 9.56         | 0.009427519                 | 0.057785096                 | 9.56         | 0.00355121                  | 0.056184363                 | 9.56         | 0.013183424                 |
| 10.56        | 0.017906504                 | 0.014243469                 | 10.56        | 0.024457347                 | 0.023574732                 | 10.56        | 0.017722042                 |
| 11.56        | 0.00904211                  | 0.016230487                 | 11.56        | -0.001377879                | 0.021252384                 | 11.56        | 0.002215098                 |
| 12.56        | 0.012724902                 | 0.015625742                 | 12.56        | 0.016242198                 | 0.01360799                  | 12.56        | 0.014948443                 |
| 13.56        | 0.001205472                 | 0.014675429                 | 13.56        | 0.00400446                  | 0.006350653                 | 13.56        | 0.004736552                 |
| 14.56        | 0.010283982                 | -0.008736835                | 14.56        | 0.017998541                 | -0.012131364                | 14.56        | 0.021378151                 |
| 15.56        | 0.007157891                 | -0.004417229                | 15.56        | -0.001491191                | 0.008285943                 | 15.56        | 0.011229297                 |
| 16.58        | 0.015636877                 | -0.005972287                | 16.58        | 0.008083706                 | -0.036032192                | 16.58        | 0.01620917                  |
| 17.58        | -0.002777082                | -0.030766825                | 17.58        | 0.014485856                 | -0.012131364                | 17.58        | 0.008707843                 |
| 18.58        | 0.007200714                 | -0.00649064                 | 18.58        | 0.020774694                 | 0.008576236                 | 18.58        | 0.013183424                 |
| 19.58        | -0.011684299                | -0.036727881                | 19.58        | 0.00281468                  | 0.005286244                 | 19.58        | -0.006231775                |
| 20.58        | -0.001106979                | -0.01219252                 | 20.58        | 0.018111853                 | -0.009421958                | 20.58        | -0.000684575                |
| 21.58        | -0.019007059                | -0.029298159                | 21.58        | 0.01561898                  | -0.017937233                | 21.58        | -0.003142993                |
| 22.58        | -0.019777876                | -0.068692965                | 22.58        | 0.008990205                 | -0.032645435                | 22.58        | 0.004673516                 |
| 23.58        | -0.017165664                | 0.008455197                 | 23.58        | -0.015485272                | 6.09616E-05                 | 23.58        | 0.005429952                 |
| 24.58        | -0.018321889                | -0.002516602                | 24.58        | 0.00445771                  | 0.016123866                 | 24.58        | 0.008140516                 |
| 25.58        | -0.025944411                | 0.042061731                 | 25.58        | 0.00638402                  | 0.05221702                  | 25.58        | 0.00927517                  |
| 26.58        | -0.001792149                | 0.050096198                 | 26.58        | 0.020491413                 | 0.059184063                 | 26.58        | 0.016713461                 |
| 27.58        | 0.005744727                 | 0.168971752                 | 27.58        | 0.016865417                 | 0.174237036                 | 27.58        | 0.037137242                 |
| 28.56        | 0.047754246                 | 0.317998156                 | 28.56        | 0.062756936                 | 0.259583313                 | 28.56        | 0.067835949                 |
| 29.61        | 0.080000086                 | 0.540457861                 | 29.61        | 0.106608832                 | 0.508655099                 | 29.61        | 0.10332542                  |
| 30.56        | 0.192025471                 | 0.817171816                 | 30.56        | 0.175672736                 | 0.753856307                 | 30.56        | 0.191639361                 |
| 31.63        | 0.22941009                  | 1.239802058                 | 31.63        | 0.213519075                 | 1.047439757                 | 31.63        | 0.205129143                 |
| 32.63        | 0.365887499                 | 1.593232214                 | 32.63        | 0.282073073                 | 1.332411168                 | 32.63        | 0.302268174                 |
| 33.63        | 0.383958873                 | 2.053961381                 | 33.63        | 0.342808516                 | 1.720436756                 | 33.63        | 0.349734554                 |
| 34.63        | 0.472645636                 | 2.422855726                 | 34.63        | 0.387113661                 | 2.040727204                 | 34.63        | 0.40470226                  |
| 35.63        | 0.565443423                 | 2.730152491                 | 35.63        | 0.468245335                 | 2.289024875                 | 35.63        | 0.492511911                 |
| 36.63        | 0.629121461                 | 3.083150686                 | 36.63        | 0.52342847                  | 2.550095458                 | 36.63        | 0.558258835                 |
| 37.65        | 0.707188081                 | 3.365912089                 | 37.65        | 0.579404793                 | 2.826067772                 | 37.65        | 0.612596178                 |
| 38.65        | 0.76585581                  | 3.669839561                 | 38.65        | 0.659233374                 | 3.098556564                 | 38.65        | 0.667752993                 |
| 39.65        | 0.835357798                 | 3.883228093                 | 39.65        | 0.723764782                 | 3.228704798                 | 39.65        | 0.730411136                 |

  

| Experiment derived linear regression parameter |           | Experiment derived linear regression parameter |           | Experiment derived linear regression parameter |            |
|------------------------------------------------|-----------|------------------------------------------------|-----------|------------------------------------------------|------------|
| parameter                                      | value     | parameter                                      | value     | parameter                                      | value      |
| y0                                             | -0.0177   | y0                                             | 0.0017    | y0                                             | -0.0065    |
| a                                              | 0.2122    | a                                              | 0.205     | a                                              | 0.3021     |
| R                                              | 0.9805126 | R                                              | 0.9936369 | R                                              | 0.98881082 |

| E3                          |              |                             | E4                          |                             |                             |
|-----------------------------|--------------|-----------------------------|-----------------------------|-----------------------------|-----------------------------|
| VIC Normalized Fluorescence | Well / Cycle | FAM Normalized Fluorescence | VIC Normalized Fluorescence | FAM Normalized Fluorescence | VIC Normalized Fluorescence |
| -0.046628318                | 0.56         | -0.047924582                | 0.037120394                 | -0.025024418                | -0.011433143                |
| -0.005707905                | 1.56         | -0.02387942                 | 0.046498071                 | -0.020347464                | 0.005910135                 |
| 0.006247758                 | 2.56         | -0.008623612                | 0.024828034                 | 0.002495054                 | 0.002709887                 |
| 0.008466335                 | 3.56         | -0.018040778                | 0.017097786                 | 0.002698399                 | 0.00116138                  |
| -0.004475362                | 4.56         | 0.01316143                  | 0.019125392                 | 0.002901745                 | 0.015304411                 |
| 0.013643014                 | 5.56         | 0.003681484                 | 0.015450357                 | 0.003376219                 | 0.013962371                 |
| 0.010315149                 | 6.56         | -0.000650412                | -0.000263589                | 0.021948474                 | -0.003587375                |
| 0.004152436                 | 7.56         | 0.013286993                 | 0.007213208                 | 0.011442271                 | 0.009007149                 |
| 0.0117942                   | 8.56         | 0.012094152                 | 0.002524369                 | 0.003172873                 | 0.010865357                 |
| 0.020791761                 | 9.56         | 0.014605396                 | 0.005945954                 | -0.002588593                | 0.012000929                 |
| 0.01006864                  | 10.56        | 0.00970847                  | -0.005332603                | -0.003469758                | 0.006116603                 |
| 0.00600125                  | 11.56        | 0.01542155                  | 0.007213208                 | 0.01801712                  | -0.000387127                |
| 0.004522199                 | 12.56        | 0.018121137                 | 0.005945954                 | 0.009883286                 | 0.003742225                 |
| 0.005508233                 | 13.56        | 0.00914344                  | -0.003811899                | -0.009027878                | 0.012826799                 |
| 0.017340641                 | 14.56        | 0.010210718                 | 0.004171799                 | 0.003918475                 | 0.02263401                  |
| 0.021901049                 | 15.56        | 0.00286533                  | 0.000496763                 | -0.002114119                | 0.027279531                 |
| 0.012040708                 | 16.58        | 0.024399248                 | -0.018131865                | 0.020728398                 | 0.001884017                 |
| 0.015615082                 | 17.58        | 0.00970847                  | -0.009894717                | -0.002385247                | 0.010762124                 |
| 0.014629048                 | 18.58        | 0.018435043                 | 0.003411447                 | 0.013882421                 | 0.009833019                 |
| 0.01844993                  | 19.58        | -0.000462069                | -0.000136863                | -1.28786E-05                | 0.020156399                 |
| 0.01931271                  | 20.58        | 0.002425862                 | 0.008987363                 | 0.002833963                 | 0.000851679                 |
| 0.017833659                 | 21.58        | -0.004605622                | 0.005312327                 | 0.008798775                 | 0.014891475                 |
| 0.023626609                 | 22.58        | 0.012910306                 | -0.007106759                | 0.001003851                 | 0.016130281                 |
| 0.034966                    | 23.58        | -0.006551836                | 0.017858139                 | -0.005706562                | 0.028105402                 |
| 0.054193664                 | 24.58        | 0.007950599                 | 0.013676201                 | -0.000148442                | 0.037189976                 |
| 0.070586481                 | 25.58        | 0.018435043                 | 0.035219514                 | 0.022490729                 | 0.083438718                 |
| 0.098811706                 | 26.58        | 0.023583093                 | 0.058663706                 | 0.027303248                 | 0.111724779                 |
| 0.157234224                 | 27.58        | 0.022578596                 | 0.107706423                 | 0.019237195                 | 0.17180685                  |
| 0.256577155                 | 28.56        | 0.081027802                 | 0.177278649                 | 0.061736479                 | 0.265336671                 |
| 0.391294059                 | 29.61        | 0.101494441                 | 0.30577817                  | 0.0909505                   | 0.394688621                 |
| 0.544375847                 | 30.56        | 0.184114372                 | 0.435291494                 | 0.135822151                 | 0.610137559                 |
| 0.777572902                 | 31.63        | 0.223792029                 | 0.64869701                  | 0.156495646                 | 0.833122564                 |
| 0.993637615                 | 32.63        | 0.327129723                 | 0.84803601                  | 0.237359513                 | 1.017394895                 |
| 1.189858393                 | 33.63        | 0.38959692                  | 1.087420226                 | 0.273487293                 | 1.284976901                 |
| 1.402595242                 | 34.63        | 0.453194177                 | 1.288153206                 | 0.331576425                 | 1.506310166                 |
| 1.543844621                 | 35.63        | 0.565446788                 | 1.448207343                 | 0.394410294                 | 1.681807624                 |
| 1.715044784                 | 36.63        | 0.62822789                  | 1.636774687                 | 0.451550478                 | 1.83851653                  |
| 1.923097971                 | 37.65        | 0.69709876                  | 1.811148791                 | 0.499472318                 | 2.015459261                 |
| 2.043517381                 | 38.65        | 0.770678212                 | 1.948392362                 | 0.537497992                 | 2.18362712                  |
| 2.207692052                 | 39.65        | 0.824481616                 | 2.071822868                 | 0.593282538                 | 2.336722843                 |

| Experiment derived linear regression |           |        | Experiment derived linear regression |            |  |
|--------------------------------------|-----------|--------|--------------------------------------|------------|--|
| parameter                            | value     | SD     | parameter                            | value      |  |
| y0                                   | 0.0008    | 0.0131 | y0                                   | -0.0051    |  |
| a                                    | 0.3667    | 0.0214 | a                                    | 0.2208     |  |
| R                                    | 0.9916244 |        | R                                    | 0.98795002 |  |

| AVERAGE | value    |
|---------|----------|
| y0      | -0.00536 |
| a       | 0.26136  |
| R       |          |

| Well /<br>Cycle     | Raw fluorescence data |          |          |          |          | Well /<br>Cycle | E5      | E6     | E7    | E8    | E9    |      |
|---------------------|-----------------------|----------|----------|----------|----------|-----------------|---------|--------|-------|-------|-------|------|
|                     | E5                    | E6       | E7       | E8       | E9       |                 |         |        |       |       |       |      |
| 0.56                | 165.75                | 171.98   | 194.61   | 166.58   | 178.83   | 0.56            | -0.0303 | -0.02  | 0.01  | -0.05 | 0.01  |      |
| 1.56                | 169.23                | 175.63   | 192.33   | 169.18   | 178.59   | 1.56            | -0.0099 | 0.00   | 0.00  | -0.04 | 0.01  |      |
| 2.56                | 171.12                | 176.73   | 192.18   | 172.85   | 177.98   | 2.56            | 0.0011  | 0.01   | 0.00  | -0.02 | 0.00  |      |
| 3.56                | 172.44                | 175.18   | 196.05   | 170.07   | 179.90   | 3.56            | 0.0088  | 0.00   | 0.02  | -0.03 | 0.01  |      |
| 4.56                | 173.37                | 177.80   | 195.32   | 174.26   | 181.59   | 4.56            | 0.0143  | 0.01   | 0.01  | -0.01 | 0.02  |      |
| 5.56                | 173.26                | 175.74   | 194.86   | 172.85   | 180.21   | 5.56            | 0.0136  | 0.00   | 0.01  | -0.02 | 0.02  |      |
| 6.56                | 172.02                | 177.80   | 194.15   | 176.65   | 178.41   | 6.56            | 0.0064  | 0.01   | 0.01  | 0.00  | 0.01  |      |
| 7.56                | 172.47                | 179.11   | 196.67   | 176.70   | 178.79   | 7.56            | 0.0090  | 0.02   | 0.02  | 0.00  | 0.01  |      |
| 8.56                | 174.60                | 179.77   | 195.38   | 178.14   | 177.86   | 8.56            | 0.0215  | 0.02   | 0.01  | 0.01  | 0.00  |      |
| 9.56                | 171.04                | 176.31   | 197.36   | 179.28   | 176.29   | 9.56            | 0.0007  | 0.00   | 0.02  | 0.02  | -0.01 |      |
| 10.56               | 172.32                | 179.87   | 195.44   | 179.28   | 178.71   | 10.56           | 0.0081  | 0.02   | 0.01  | 0.02  | 0.01  |      |
| 11.56               | 174.14                | 175.25   | 193.99   | 177.07   | 179.11   | 11.56           | 0.0188  | 0.00   | 0.00  | 0.01  | 0.01  |      |
| 12.56               | 173.80                | 180.60   | 197.20   | 177.54   | 181.01   | 12.56           | 0.0168  | 0.03   | 0.02  | 0.01  | 0.02  |      |
| 13.56               | 170.00                | 174.86   | 193.36   | 177.76   | 177.94   | 13.56           | -0.0054 | 0.00   | 0.00  | 0.01  | 0.00  |      |
| 14.56               | 173.12                | 180.35   | 197.57   | 180.44   | 179.48   | 14.56           | 0.0128  | 0.03   | 0.02  | 0.03  | 0.01  |      |
| 15.56               | 172.18                | 175.33   | 189.57   | 178.68   | 180.85   | 15.56           | 0.0073  | 0.00   | -0.02 | 0.02  | 0.02  |      |
| 16.58               | 170.82                | 175.77   | 194.00   | 181.10   | 177.84   | 16.58           | -0.0006 | 0.00   | 0.01  | 0.03  | 0.00  |      |
| 17.58               | 169.27                | 173.54   | 191.70   | 180.37   | 178.66   | 17.58           | -0.0097 | -0.01  | -0.01 | 0.03  | 0.01  |      |
| 18.58               | 171.46                | 177.14   | 195.94   | 179.96   | 175.61   | 18.58           | 0.0031  | 0.01   | 0.02  | 0.02  | -0.01 |      |
| 19.58               | 169.58                | 171.79   | 191.83   | 178.56   | 175.49   | 19.58           | -0.0079 | -0.02  | -0.01 | 0.02  | -0.01 |      |
| 20.58               | 171.41                | 174.16   | 192.19   | 180.08   | 176.41   | 20.58           | 0.0028  | -0.01  | 0.00  | 0.02  | 0.00  |      |
| 21.58               | 167.54                | 172.06   | 188.82   | 180.47   | 173.58   | 21.58           | -0.0198 | -0.02  | -0.02 | 0.03  | -0.02 |      |
| 22.58               | 173.48                | 173.49   | 188.73   | 183.47   | 175.99   | 22.58           | 0.0149  | -0.01  | -0.02 | 0.04  | -0.01 |      |
| 23.58               | 168.03                | 173.05   | 190.76   | 180.83   | 173.56   | 23.58           | -0.0170 | -0.01  | -0.01 | 0.03  | -0.02 |      |
| 24.58               | 170.92                | 174.51   | 188.44   | 182.56   | 173.06   | 24.58           | 0.0000  | -0.01  | -0.02 | 0.04  | -0.02 |      |
| 25.58               | 170.27                | 175.29   | 188.54   | 183.67   | 175.29   | 25.58           | -0.0039 | 0.00   | -0.02 | 0.04  | -0.01 |      |
| 26.58               | 170.39                | 175.53   | 193.78   | 186.92   | 178.62   | 26.58           | -0.0031 | 0.00   | 0.00  | 0.06  | 0.01  |      |
| 27.58               | 175.06                | 176.41   | 194.92   | 185.73   | 176.81   | 27.58           | 0.0242  | 0.01   | 0.01  | 0.06  | 0.00  |      |
| 28.56               | 176.54                | 182.12   | 202.22   | 192.49   | 185.69   | 28.56           | 0.0328  | 0.04   | 0.05  | 0.09  | 0.05  |      |
| 29.61               | 182.23                | 182.65   | 202.74   | 193.46   | 189.68   | 29.61           | 0.0661  | 0.04   | 0.05  | 0.10  | 0.07  |      |
| 30.56               | 191.06                | 192.34   | 215.11   | 204.06   | 202.39   | 30.56           | 0.1178  | 0.10   | 0.11  | 0.16  | 0.14  |      |
| 31.63               | 190.79                | 196.39   | 215.44   | 211.45   | 207.45   | 31.63           | 0.1162  | 0.12   | 0.12  | 0.20  | 0.17  |      |
| 32.63               | 202.85                | 213.14   | 234.77   | 223.27   | 218.48   | 32.63           | 0.1868  | 0.21   | 0.22  | 0.27  | 0.23  |      |
| 33.63               | 207.66                | 212.51   | 236.26   | 225.03   | 223.68   | 33.63           | 33.63   | 0.2149 | 0.21  | 0.22  | 0.28  | 0.26 |
| 34.63               | 218.28                | 223.72   | 248.34   | 234.47   | 234.58   | 34.63           | 0.2770  | 0.27   | 0.29  | 0.33  | 0.32  |      |
| 35.63               | 229.11                | 238.31   | 259.42   | 244.98   | 245.04   | 35.63           | 0.3404  | 0.36   | 0.34  | 0.39  | 0.38  |      |
| 36.63               | 230.73                | 245.64   | 271.24   | 251.41   | 254.53   | 36.63           | 0.3499  | 0.40   | 0.41  | 0.43  | 0.44  |      |
| 37.65               | 241.37                | 255.18   | 279.67   | 263.67   | 265.17   | 37.65           | 0.4121  | 0.45   | 0.45  | 0.50  | 0.50  |      |
| 38.65               | 246.71                | 266.95   | 290.05   | 271.17   | 275.23   | 38.65           | 0.4434  | 0.52   | 0.50  | 0.54  | 0.55  |      |
| 39.65               | 256.47                | 272.54   | 300.66   | 282.58   | 284.27   | 39.65           | 0.5005  | 0.55   | 0.56  | 0.61  | 0.60  |      |
| Parameter           |                       |          |          |          |          |                 |         |        |       |       |       |      |
| a                   | 92.2695               | 109.1196 | 118.7074 | 152.9854 | 117.6231 |                 |         |        |       |       |       |      |
| b                   | 2.4755                | 2.3676   | 2.4334   | 3.9397   | 2.5096   |                 |         |        |       |       |       |      |
| x0                  | 34.5634               | 35.0125  | 34.9120  | 36.5032  | 34.6783  |                 |         |        |       |       |       |      |
| y0                  | 170.9283              | 175.5163 | 193.0256 | 175.8413 | 177.2635 |                 |         |        |       |       |       |      |
| R                   | 0.9949                | 0.9947   | 0.9940   | 0.9947   | 0.9949   |                 |         |        |       |       |       |      |
| CP <sub>(SDM)</sub> | 31.3032               | 31.8944  | 31.7072  | 31.3146  | 31.3732  |                 |         |        |       |       |       |      |

| Well /<br>Cycle           | E5     | E6     | E7     | E8     | E9       | Well /<br>Cycle | Fluorescence Data Normalized To Y0 |       |       |       |       |
|---------------------------|--------|--------|--------|--------|----------|-----------------|------------------------------------|-------|-------|-------|-------|
|                           |        |        |        |        |          |                 | E5                                 | E6    | E7    | E8    | E9    |
| 0.56                      | 99.49  | 113.83 | 118.27 | 106.79 | 97.99    | 0.56            | -0.01                              | 0.02  | 0.01  | -0.02 | 0.01  |
| 1.56                      | 100.74 | 114.94 | 120.97 | 108.98 | 100.59   | 1.56            | 0.00                               | 0.03  | 0.03  | 0.00  | 0.04  |
| 2.56                      | 100.39 | 113.78 | 118.87 | 107.47 | 98.44    | 2.56            | 0.00                               | 0.02  | 0.02  | -0.01 | 0.01  |
| 3.56                      | 99.26  | 116.32 | 121.26 | 109.45 | 100.54   | 3.56            | -0.01                              | 0.05  | 0.04  | 0.01  | 0.03  |
| 4.56                      | 100.54 | 117.27 | 121.91 | 107.31 | 101.27   | 4.56            | 0.00                               | 0.05  | 0.04  | -0.01 | 0.04  |
| 5.56                      | 100.66 | 116.39 | 119.83 | 109.73 | 99.48    | 5.56            | 0.00                               | 0.05  | 0.02  | 0.01  | 0.02  |
| 6.56                      | 100.01 | 114.62 | 120.86 | 108.97 | 99.44    | 6.56            | -0.01                              | 0.03  | 0.03  | 0.00  | 0.02  |
| 7.56                      | 100.96 | 114.94 | 119.83 | 108.9  | 99.46    | 7.56            | 0.00                               | 0.03  | 0.02  | 0.00  | 0.02  |
| 8.56                      | 100.85 | 113.65 | 119.98 | 107.22 | 96.55    | 8.56            | 0.00                               | 0.02  | 0.02  | -0.01 | -0.01 |
| 9.56                      | 101.11 | 114.97 | 119.21 | 110.3  | 98.93    | 9.56            | 0.01                               | 0.03  | 0.02  | 0.01  | 0.02  |
| 10.56                     | 101.92 | 111.59 | 119.14 | 111.12 | 100.08   | 10.56           | 0.01                               | 0.00  | 0.02  | 0.02  | 0.03  |
| 11.56                     | 101.62 | 113.05 | 118.36 | 110.02 | 98.39    | 11.56           | 0.01                               | 0.02  | 0.01  | 0.01  | 0.01  |
| 12.56                     | 100.89 | 110.39 | 116.9  | 110.03 | 98.53    | 12.56           | 0.00                               | -0.01 | 0.00  | 0.01  | 0.01  |
| 13.56                     | 101.67 | 112.03 | 119.01 | 111.2  | 98.63    | 13.56           | 0.01                               | 0.01  | 0.02  | 0.02  | 0.02  |
| 14.56                     | 102.14 | 109.92 | 117.71 | 110.28 | 95.42    | 14.56           | 0.02                               | -0.01 | 0.01  | 0.01  | -0.02 |
| 15.56                     | 103.97 | 112.33 | 118.24 | 111.04 | 97.11    | 15.56           | 0.03                               | 0.01  | 0.01  | 0.02  | 0.00  |
| 16.58                     | 102.1  | 110.09 | 117.71 | 111.47 | 98.25    | 16.58           | 0.02                               | -0.01 | 0.01  | 0.02  | 0.01  |
| 17.58                     | 102.46 | 109.46 | 117.46 | 111.23 | 96.94    | 17.58           | 0.02                               | -0.02 | 0.00  | 0.02  | 0.00  |
| 18.58                     | 101.75 | 110.48 | 117.61 | 110    | 97.43    | 18.58           | 0.01                               | -0.01 | 0.00  | 0.01  | 0.00  |
| 19.58                     | 103.15 | 110.1  | 116.9  | 111.21 | 98.3     | 19.58           | 0.03                               | -0.01 | 0.00  | 0.02  | 0.01  |
| 20.58                     | 103.36 | 109.98 | 115.15 | 111.62 | 96.55    | 20.58           | 0.03                               | -0.01 | -0.02 | 0.03  | -0.01 |
| 21.58                     | 103.84 | 111.5  | 116.69 | 112.19 | 96.43    | 21.58           | 0.03                               | 0.00  | 0.00  | 0.03  | -0.01 |
| 22.58                     | 102.69 | 110.73 | 118.75 | 113.19 | 97.11    | 22.58           | 0.02                               | 0.00  | 0.01  | 0.04  | 0.00  |
| 23.58                     | 104.12 | 112.8  | 115.54 | 112.4  | 97.34    | 23.58           | 0.04                               | 0.01  | -0.01 | 0.03  | 0.00  |
| 24.58                     | 104.51 | 112.42 | 118.71 | 115.19 | 99.7     | 24.58           | 0.04                               | 0.01  | 0.01  | 0.06  | 0.03  |
| 25.58                     | 107.01 | 113.62 | 123.17 | 119.74 | 103.46   | 25.58           | 0.06                               | 0.02  | 0.05  | 0.10  | 0.06  |
| 26.58                     | 109.07 | 120.78 | 127.03 | 125    | 105.72   | 26.58           | 0.08                               | 0.09  | 0.09  | 0.15  | 0.09  |
| 27.58                     | 118.26 | 129.83 | 137.02 | 132.97 | 114.19   | 27.58           | 0.18                               | 0.17  | 0.17  | 0.22  | 0.18  |
| 28.56                     | 129.58 | 144.61 | 149.65 | 147.94 | 125.25   | 28.56           | 0.29                               | 0.30  | 0.28  | 0.36  | 0.29  |
| 29.61                     | 146.93 | 167.86 | 176.95 | 170.06 | 146.99   | 29.61           | 0.46                               | 0.51  | 0.51  | 0.56  | 0.51  |
| 30.56                     | 164.06 | 195.51 | 206.94 | 193.78 | 166.32   | 30.56           | 0.63                               | 0.76  | 0.77  | 0.78  | 0.71  |
| 31.63                     | 191.93 | 233.94 | 248.03 | 228.92 | 192.5    | 31.63           | 0.91                               | 1.10  | 1.12  | 1.10  | 0.98  |
| 32.63                     | 217.08 | 269.41 | 287.34 | 265.15 | 218.93   | 32.63           | 1.16                               | 1.42  | 1.45  | 1.44  | 1.25  |
| 33.63                     | 247.75 | 315.98 | 334.4  | 305.87 | 249.33   | 33.63           | 1.46                               | 1.84  | 1.86  | 1.81  | 1.57  |
| 34.63                     | 271.33 | 348.62 | 370.69 | 342.56 | 278.57   | 34.63           | 1.70                               | 2.14  | 2.17  | 2.15  | 1.87  |
| 35.63                     | 291.35 | 380.23 | 403.71 | 366.1  | 297.1    | 35.63           | 1.90                               | 2.42  | 2.45  | 2.37  | 2.06  |
| 36.63                     | 313.18 | 407.16 | 439.39 | 395.87 | 315.24   | 36.63           | 2.12                               | 2.66  | 2.75  | 2.64  | 2.24  |
| 37.65                     | 333.05 | 440.03 | 466.29 | 422.26 | 341.39   | 37.65           | 2.31                               | 2.96  | 2.98  | 2.88  | 2.51  |
| 38.65                     | 351.4  | 461.29 | 492.88 | 445.79 | 359.08   | 38.65           | 2.50                               | 3.15  | 3.21  | 3.10  | 2.70  |
| 39.65                     | 366.75 | 483.73 | 515.38 | 470.58 | 374.32   | 39.65           | 2.65                               | 3.35  | 3.40  | 3.33  | 2.85  |
| <b>Parameter</b>          |        |        |        |        |          |                 |                                    |       |       |       |       |
| <b>a</b>                  | 280.72 | 385.91 | 412.89 | 381.09 | 290.0358 |                 |                                    |       |       |       |       |
| <b>b</b>                  | 2.4326 | 2.2603 | 2.2473 | 2.4474 | 2.3875   |                 |                                    |       |       |       |       |
| <b>x0</b>                 | 33.574 | 33.545 | 33.549 | 33.622 | 33.5004  |                 |                                    |       |       |       |       |
| <b>y0</b>                 | 100.53 | 111.18 | 117.07 | 108.78 | 97.1572  |                 |                                    |       |       |       |       |
| <b>R</b>                  | 0.9994 | 0.9991 | 0.9993 | 0.9995 | 0.999095 |                 |                                    |       |       |       |       |
| <b>CP<sub>(SDM)</sub></b> | 30.37  | 30.57  | 30.59  | 30.40  | 30.36    |                 |                                    |       |       |       |       |

| E5           |                             |                             | E6           |                             |                             |              |
|--------------|-----------------------------|-----------------------------|--------------|-----------------------------|-----------------------------|--------------|
| Well / Cycle | FAM Normalized Fluorescence | VIC Normalized Fluorescence | Well / Cycle | FAM Normalized Fluorescence | VIC Normalized Fluorescence | Well / Cycle |
| 0.56         | -0.030295159                | -0.010352062                | 0.56         | -0.020147986                | 0.023818647                 | 0.56         |
| 1.56         | -0.009935745                | 0.002081951                 | 1.56         | 0.000647803                 | 0.033802295                 | 1.56         |
| 2.56         | 0.001121523                 | -0.001399572                | 2.56         | 0.006915027                 | 0.023368933                 | 2.56         |
| 3.56         | 0.008844059                 | -0.01263992                 | 3.56         | -0.001916061                | 0.046214398                 | 3.56         |
| 4.56         | 0.014284937                 | 9.25091E-05                 | 4.56         | 0.013011327                 | 0.054758962                 | 4.56         |
| 5.56         | 0.013641392                 | 0.001286174                 | 5.56         | 0.001274525                 | 0.046843998                 | 5.56         |
| 6.56         | 0.006386889                 | -0.005179512                | 6.56         | 0.013011327                 | 0.030924126                 | 6.56         |
| 7.56         | 0.009019571                 | 0.004270337                 | 7.56         | 0.020475021                 | 0.033802295                 | 7.56         |
| 8.56         | 0.021480937                 | 0.003176144                 | 8.56         | 0.024235356                 | 0.022199677                 | 8.56         |
| 9.56         | 0.00065349                  | 0.005762419                 | 9.56         | 0.004522087                 | 0.034072123                 | 9.56         |
| 10.56        | 0.00814201                  | 0.013819659                 | 10.56        | 0.024805104                 | 0.003671464                 | 10.56        |
| 11.56        | 0.01878975                  | 0.010835496                 | 11.56        | -0.001517238                | 0.01680311                  | 11.56        |
| 12.56        | 0.016800612                 | 0.003574033                 | 12.56        | 0.028964261                 | -0.007121669                | 12.56        |
| 13.56        | -0.005430932                | 0.011332857                 | 13.56        | -0.003739254                | 0.007628946                 | 13.56        |
| 14.56        | 0.012822335                 | 0.016008045                 | 14.56        | 0.027539892                 | -0.01134898                 | 14.56        |
| 15.56        | 0.007322954                 | 0.03421144                  | 15.56        | -0.00106144                 | 0.01032723                  | 15.56        |
| 16.58        | -0.000633599                | 0.015610157                 | 16.58        | 0.00144545                  | -0.009819953                | 16.58        |
| 17.58        | -0.009701729                | 0.019191153                 | 17.58        | -0.011259923                | -0.015486348                | 17.58        |
| 18.58        | 0.003110661                 | 0.012128633                 | 18.58        | 0.009250993                 | -0.006312184                | 18.58        |
| 19.58        | -0.007888103                | 0.026054728                 | 19.58        | -0.021230507                | -0.00973001                 | 19.58        |
| 20.58        | 0.002818141                 | 0.028143642                 | 20.58        | -0.007727487                | -0.010809323                | 20.58        |
| 21.58        | -0.019822932                | 0.032918303                 | 21.58        | -0.019692188                | 0.002861979                 | 21.58        |
| 22.58        | 0.014928482                 | 0.021479011                 | 22.58        | -0.011544797                | -0.004063615                | 22.58        |
| 23.58        | -0.016956233                | 0.035703521                 | 23.58        | -0.014051686                | 0.01455454                  | 23.58        |
| 24.58        | -4.85584E-05                | 0.039582933                 | 24.58        | -0.005733371                | 0.011136715                 | 24.58        |
| 25.58        | -0.003851322                | 0.064450959                 | 25.58        | -0.001289339                | 0.021929848                 | 25.58        |
| 26.58        | -0.003149274                | 0.084942212                 | 26.58        | 7.80554E-05                 | 0.086328878                 | 26.58        |
| 27.58        | 0.024172124                 | 0.176357073                 | 27.58        | 0.005091835                 | 0.167727092                 | 27.58        |
| 28.56        | 0.032830725                 | 0.288959492                 | 28.56        | 0.037624426                 | 0.300662519                 | 28.56        |
| 29.61        | 0.066119537                 | 0.461543588                 | 29.61        | 0.040644088                 | 0.509779478                 | 29.61        |
| 30.56        | 0.117778624                 | 0.631939298                 | 30.56        | 0.095852636                 | 0.758471261                 | 30.56        |
| 31.63        | 0.116199014                 | 0.909168045                 | 31.63        | 0.118927416                 | 1.104121358                 | 31.63        |
| 32.63        | 0.186754914                 | 1.159340381                 | 32.63        | 0.214360148                 | 1.423148393                 | 32.63        |
| 33.63        | 0.214895368                 | 1.464421316                 | 33.63        | 0.210770738                 | 1.842011912                 | 33.63        |
| 34.63        | 0.277026683                 | 1.698976532                 | 34.63        | 0.274639449                 | 2.135585141                 | 34.63        |
| 35.63        | 0.340386583                 | 1.898119679                 | 35.63        | 0.357765632                 | 2.419894263                 | 35.63        |
| 36.63        | 0.349864241                 | 2.115267277                 | 36.63        | 0.399528135                 | 2.662110166                 | 36.63        |
| 37.65        | 0.412112564                 | 2.312918342                 | 37.65        | 0.453882061                 | 2.957752078                 | 37.65        |
| 38.65        | 0.443353734                 | 2.495449649                 | 38.65        | 0.52094136                  | 3.148970425                 | 38.65        |
| 39.65        | 0.500453699                 | 2.648139325                 | 39.65        | 0.552790254                 | 3.35080202                  | 39.65        |

| Experiment derived linear regress |            |
|-----------------------------------|------------|
| parameter                         | value      |
| y0                                | -0.0023    |
| a                                 | 0.1521     |
| R                                 | 0.98058337 |

| Experiment derived linear regress |            |
|-----------------------------------|------------|
| parameter                         | value      |
| y0                                | -0.0119    |
| a                                 | 0.1321     |
| R                                 | 0.96964032 |

| Experiment derived |  |
|--------------------|--|
| parameter          |  |
| y0                 |  |
| a                  |  |
| R                  |  |

| E7                              |                                |                 | E8                              |                                | E9                              |                                |
|---------------------------------|--------------------------------|-----------------|---------------------------------|--------------------------------|---------------------------------|--------------------------------|
| FAM Normal ized<br>Fluorescence | VIC Normalized<br>Fluorescence | Well /<br>Cycle | FAM Normal ized<br>Fluorescence | VIC Normalized<br>Fluorescence | FAM Normal ized<br>Fluorescence | VIC Normalized<br>Fluorescence |
| 0.008208238                     | 0.010220938                    | 0.56            | -0.052668514                    | -0.018273949                   | 0.008837127                     | 0.008571676                    |
| -0.003603667                    | 0.033283393                    | 1.56            | -0.037882454                    | 0.001858835                    | 0.00748321                      | 0.03533243                     |
| -0.004380766                    | 0.015345928                    | 2.56            | -0.017011362                    | -0.012022674                   | 0.004042005                     | 0.013203345                    |
| 0.015668388                     | 0.035760472                    | 3.56            | -0.032821072                    | 0.00617957                     | 0.014873338                     | 0.0348178                      |
| 0.011886506                     | 0.041312544                    | 4.56            | -0.008992768                    | -0.013493562                   | 0.024407168                     | 0.042331397                    |
| 0.009503403                     | 0.023545912                    | 5.56            | -0.017011362                    | 0.008753624                    | 0.016622147                     | 0.023907647                    |
| 0.005825134                     | 0.032343812                    | 6.56            | 0.004599033                     | 0.001766905                    | 0.006467773                     | 0.023495943                    |
| 0.018880397                     | 0.023545912                    | 7.56            | 0.004883381                     | 0.001123391                    | 0.008611474                     | 0.023701795                    |
| 0.012197346                     | 0.02482716                     | 8.56            | 0.013072583                     | -0.014320937                   | 0.003365047                     | -0.006249665                   |
| 0.022455053                     | 0.018250089                    | 9.56            | 0.019555702                     | 0.013993664                    | -0.005491824                    | 0.018246718                    |
| 0.012508185                     | 0.017652174                    | 10.56           | 0.019555702                     | 0.021531967                    | 0.008160168                     | 0.030083205                    |
| 0.004996228                     | 0.010989687                    | 11.56           | 0.006987551                     | 0.01141961                     | 0.010416696                     | 0.012688715                    |
| 0.021626147                     | -0.001481122                   | 12.56           | 0.009660415                     | 0.01151154                     | 0.021135203                     | 0.014129679                    |
| 0.001732413                     | 0.016541759                    | 13.56           | 0.010911544                     | 0.022267411                    | 0.003816352                     | 0.015158938                    |
| 0.023542991                     | 0.005437614                    | 14.56           | 0.026152559                     | 0.013809803                    | 0.012503984                     | -0.017880301                   |
| -0.017902289                    | 0.009964689                    | 15.56           | 0.016143534                     | 0.020796523                    | 0.020232592                     | -0.000485811                   |
| 0.005048035                     | 0.005437614                    | 16.58           | 0.029905944                     | 0.024749535                    | 0.003252221                     | 0.011247751                    |
| -0.006867483                    | 0.003302202                    | 17.58           | 0.025754473                     | 0.022543203                    | 0.007878102                     | -0.002235552                   |
| 0.015098515                     | 0.004583449                    | 18.58           | 0.023422825                     | 0.011235748                    | -0.009327921                    | 0.002807821                    |
| -0.006193997                    | -0.001481122                   | 19.58           | 0.0154611                       | 0.022359342                    | -0.01000488                     | 0.011762381                    |
| -0.004328959                    | -0.016429009                   | 20.58           | 0.024105259                     | 0.026128493                    | -0.004814866                    | -0.006249665                   |
| -0.021787784                    | -0.003274869                   | 21.58           | 0.026323168                     | 0.031368533                    | -0.0207798                      | -0.007484777                   |
| -0.022254043                    | 0.01432093                     | 22.58           | 0.043384006                     | 0.040561585                    | -0.00718422                     | -0.000485811                   |
| -0.011737303                    | -0.013097766                   | 23.58           | 0.028370468                     | 0.033299074                    | -0.020892626                    | 0.001881487                    |
| -0.023756434                    | 0.013979264                    | 24.58           | 0.038208885                     | 0.05894769                     | -0.023713286                    | 0.026172018                    |
| -0.023238368                    | 0.052075023                    | 25.58           | 0.044521395                     | 0.100776077                    | -0.011133144                    | 0.064872187                    |
| 0.00390829                      | 0.085045792                    | 26.58           | 0.06300397                      | 0.149131532                    | 0.00765245                      | 0.088133458                    |
| 0.009814242                     | 0.170376875                    | 27.58           | 0.056236504                     | 0.222400159                    | -0.002558338                    | 0.175311763                    |
| 0.04763306                      | 0.278257913                    | 28.56           | 0.09468026                      | 0.360020151                    | 0.047536577                     | 0.289147896                    |
| 0.050327003                     | 0.511444957                    | 29.61           | 0.100196598                     | 0.563370467                    | 0.070045441                     | 0.512908976                    |
| 0.114411767                     | 0.767609038                    | 30.56           | 0.160478227                     | 0.781429667                    | 0.141746609                     | 0.711864895                    |
| 0.116121385                     | 1.118585434                    | 31.63           | 0.202504759                     | 1.104473523                    | 0.170291684                     | 0.98132511                     |
| 0.216263542                     | 1.454357694                    | 32.63           | 0.269724462                     | 1.437537806                    | 0.232515436                     | 1.253358475                    |
| 0.223982726                     | 1.85632774                     | 33.63           | 0.279733487                     | 1.811878894                    | 0.261850296                     | 1.566253453                    |
| 0.286565098                     | 2.166304216                    | 34.63           | 0.333418258                     | 2.149171982                    | 0.323340676                     | 1.867209018                    |
| 0.343966811                     | 2.448349497                    | 35.63           | 0.393188062                     | 2.365576432                    | 0.382348876                     | 2.057930858                    |
| 0.405202212                     | 2.753115567                    | 36.63           | 0.429755126                     | 2.639253598                    | 0.435884996                     | 2.244638586                    |
| 0.448875175                     | 2.98288595                     | 37.65           | 0.499477085                     | 2.881858247                    | 0.495908633                     | 2.513790023                    |
| 0.502650426                     | 3.210008422                    | 38.65           | 0.542129181                     | 3.098170766                    | 0.552660305                     | 2.695866081                    |
| 0.557617228                     | 3.402195546                    | 39.65           | 0.607017237                     | 3.326066532                    | 0.603657831                     | 2.852725274                    |

| Linear regression<br>value |
|----------------------------|
| -0.0023                    |
| 0.1291                     |
| 0.96857666                 |

| Experiment derived linear regress<br>parameter | value      | SD     |
|------------------------------------------------|------------|--------|
| y0                                             | 0.0331     | 0.0133 |
| a                                              | 0.1483     | 0.0127 |
| R                                              | 0.98227572 |        |

| Experiment derived linear regression<br>parameter | value      |
|---------------------------------------------------|------------|
| y0                                                | -0.0167    |
| a                                                 | 0.1892     |
| R                                                 | 0.98612443 |

| AVERAGE | value   | SD          |
|---------|---------|-------------|
| y0      | -2E-05  |             |
| a       | 0.15016 | 0.023984537 |

| Well /<br>Cycle     | Raw fluorescence data |        |        |        |        | Well /<br>Cycle | F2      | F3    | F4    | F5    | F6    |
|---------------------|-----------------------|--------|--------|--------|--------|-----------------|---------|-------|-------|-------|-------|
|                     | F2                    | F3     | F4     | F5     | F6     |                 |         |       |       |       |       |
| 0.56                | 155.03                | 155.67 | 158.16 | 151.83 | 164.19 | 0.56            | -0.0337 | -0.03 | -0.03 | -0.02 | -0.02 |
| 1.56                | 160.65                | 158.58 | 160.86 | 150.38 | 165.45 | 1.56            | 0.0013  | -0.02 | -0.01 | -0.03 | -0.01 |
| 2.56                | 159.81                | 161.00 | 165.51 | 154.79 | 168.27 | 2.56            | -0.0039 | 0.00  | 0.02  | 0.00  | 0.00  |
| 3.56                | 162.37                | 161.58 | 162.66 | 154.00 | 166.82 | 3.56            | 0.0121  | 0.00  | 0.00  | 0.00  | 0.00  |
| 4.56                | 163.90                | 163.11 | 163.69 | 155.72 | 170.50 | 4.56            | 0.0216  | 0.01  | 0.01  | 0.01  | 0.02  |
| 5.56                | 162.43                | 163.05 | 164.09 | 155.58 | 170.37 | 5.56            | 0.0124  | 0.01  | 0.01  | 0.01  | 0.02  |
| 6.56                | 162.01                | 164.46 | 166.27 | 155.19 | 169.50 | 6.56            | 0.0098  | 0.02  | 0.02  | 0.01  | 0.01  |
| 7.56                | 160.84                | 161.83 | 165.07 | 155.65 | 170.79 | 7.56            | 0.0025  | 0.00  | 0.02  | 0.01  | 0.02  |
| 8.56                | 164.22                | 161.80 | 166.81 | 155.72 | 170.63 | 8.56            | 0.0236  | 0.00  | 0.03  | 0.01  | 0.02  |
| 9.56                | 161.96                | 160.89 | 161.82 | 155.74 | 168.77 | 9.56            | 0.0095  | 0.00  | 0.00  | 0.01  | 0.01  |
| 10.56               | 163.33                | 162.74 | 163.36 | 154.90 | 168.76 | 10.56           | 0.0180  | 0.01  | 0.00  | 0.00  | 0.01  |
| 11.56               | 159.93                | 160.98 | 161.87 | 155.30 | 168.15 | 11.56           | -0.0031 | 0.00  | 0.00  | 0.01  | 0.00  |
| 12.56               | 162.45                | 162.47 | 166.14 | 153.66 | 167.35 | 12.56           | 0.0126  | 0.01  | 0.02  | 0.00  | 0.00  |
| 13.56               | 159.31                | 159.62 | 165.02 | 152.49 | 165.67 | 13.56           | -0.0070 | -0.01 | 0.01  | -0.01 | -0.01 |
| 14.56               | 164.06                | 163.44 | 163.13 | 157.29 | 170.17 | 14.56           | 0.0226  | 0.01  | 0.00  | 0.02  | 0.02  |
| 15.56               | 158.31                | 161.24 | 161.33 | 154.34 | 167.04 | 15.56           | -0.0132 | 0.00  | -0.01 | 0.00  | 0.00  |
| 16.58               | 161.50                | 161.14 | 164.87 | 154.80 | 169.62 | 16.58           | 0.0066  | 0.00  | 0.01  | 0.00  | 0.01  |
| 17.58               | 159.90                | 161.72 | 159.47 | 154.97 | 168.24 | 17.58           | -0.0033 | 0.00  | -0.02 | 0.00  | 0.00  |
| 18.58               | 161.40                | 164.53 | 164.62 | 156.09 | 169.91 | 18.58           | 0.0060  | 0.02  | 0.01  | 0.01  | 0.01  |
| 19.58               | 159.43                | 163.12 | 160.61 | 153.79 | 166.45 | 19.58           | -0.0063 | 0.01  | -0.01 | 0.00  | -0.01 |
| 20.58               | 159.29                | 160.36 | 161.12 | 154.24 | 166.23 | 20.58           | -0.0071 | 0.00  | -0.01 | 0.00  | -0.01 |
| 21.58               | 159.67                | 160.30 | 160.10 | 154.08 | 164.25 | 21.58           | -0.0048 | -0.01 | -0.02 | 0.00  | -0.02 |
| 22.58               | 160.15                | 161.34 | 162.53 | 155.16 | 167.90 | 22.58           | -0.0018 | 0.00  | 0.00  | 0.01  | 0.00  |
| 23.58               | 159.51                | 161.00 | 159.24 | 154.06 | 164.16 | 23.58           | -0.0058 | 0.00  | -0.02 | 0.00  | -0.02 |
| 24.58               | 159.22                | 160.93 | 163.57 | 155.72 | 167.39 | 24.58           | -0.0076 | 0.00  | 0.01  | 0.01  | 0.00  |
| 25.58               | 159.06                | 159.89 | 161.51 | 153.33 | 164.37 | 25.58           | -0.0086 | -0.01 | -0.01 | -0.01 | -0.02 |
| 26.58               | 161.57                | 161.97 | 165.35 | 155.06 | 169.25 | 26.58           | 0.0071  | 0.01  | 0.02  | 0.00  | 0.01  |
| 27.58               | 158.47                | 162.38 | 165.40 | 155.50 | 169.94 | 27.58           | -0.0122 | 0.01  | 0.02  | 0.01  | 0.01  |
| 28.56               | 161.65                | 167.49 | 168.52 | 158.58 | 174.31 | 28.56           | 0.0076  | 0.04  | 0.04  | 0.03  | 0.04  |
| 29.61               | 166.88                | 165.40 | 166.80 | 157.86 | 175.31 | 29.61           | 0.0402  | 0.03  | 0.03  | 0.02  | 0.05  |
| 30.56               | 173.84                | 176.53 | 177.49 | 165.34 | 181.23 | 30.56           | 0.0836  | 0.10  | 0.09  | 0.07  | 0.08  |
| 31.63               | 176.81                | 175.72 | 177.18 | 166.74 | 185.89 | 31.63           | 0.1021  | 0.09  | 0.09  | 0.08  | 0.11  |
| 32.63               | 185.11                | 183.21 | 190.63 | 175.88 | 194.79 | 32.63           | 0.1538  | 0.14  | 0.17  | 0.14  | 0.16  |
| 33.63               | 188.06                | 187.93 | 191.06 | 177.08 | 197.50 | 33.63           | 0.1722  | 0.17  | 0.17  | 0.15  | 0.18  |
| 34.63               | 198.49                | 192.80 | 199.65 | 182.57 | 206.64 | 34.63           | 0.2372  | 0.20  | 0.23  | 0.18  | 0.23  |
| 35.63               | 203.68                | 202.77 | 206.83 | 186.16 | 212.38 | 35.63           | 0.2695  | 0.26  | 0.27  | 0.21  | 0.27  |
| 36.63               | 209.29                | 207.96 | 212.38 | 195.05 | 217.42 | 36.63           | 0.3045  | 0.29  | 0.31  | 0.26  | 0.30  |
| 37.65               | 219.89                | 215.74 | 219.38 | 198.53 | 225.88 | 37.65           | 0.3706  | 0.34  | 0.35  | 0.29  | 0.35  |
| 38.65               | 226.70                | 220.38 | 227.68 | 203.46 | 232.28 | 38.65           | 0.4130  | 0.37  | 0.40  | 0.32  | 0.39  |
| 39.65               | 229.45                | 227.04 | 230.78 | 207.52 | 237.94 | 39.65           | 0.4302  | 0.41  | 0.42  | 0.34  | 0.42  |
| Parameter           |                       |        |        |        |        |                 |         |       |       |       |       |
| a                   | 77.14                 | 76.26  | 76.61  | 59.73  | 78.07  |                 |         |       |       |       |       |
| b                   | 2.31                  | 2.57   | 2.45   | 2.48   | 2.51   |                 |         |       |       |       |       |
| x0                  | 34.88                 | 35.27  | 34.80  | 34.85  | 34.75  |                 |         |       |       |       |       |
| y0                  | 160.44                | 161.16 | 162.62 | 154.32 | 167.50 |                 |         |       |       |       |       |
| R                   | 0.99                  | 0.99   | 0.99   | 0.99   | 0.99   |                 |         |       |       |       |       |
| CP <sub>(SDM)</sub> | 31.84                 | 31.89  | 31.58  | 31.58  | 31.44  |                 |         |       |       |       |       |

| Well /<br>Cycle           | F2     | F3     | F4     | F5     | F6       | Well /<br>Cycle | Fluorescence Data Normalized To Y0 |       |       |      |      |
|---------------------------|--------|--------|--------|--------|----------|-----------------|------------------------------------|-------|-------|------|------|
|                           |        |        |        |        |          |                 | F2                                 | F3    | F4    | F5   | F6   |
| 0.56                      | 79.76  | 81.4   | 87.15  | 84.48  | 90.63    | 0.56            | -0.1343                            | -0.03 | 0.01  | 0.04 | 0.14 |
| 1.56                      | 81.31  | 82.65  | 88.44  | 84.89  | 93.77    | 1.56            | -0.1174                            | -0.02 | 0.02  | 0.04 | 0.18 |
| 2.56                      | 81.27  | 82.88  | 88.48  | 84.74  | 92.42    | 2.56            | -0.1179                            | -0.01 | 0.02  | 0.04 | 0.16 |
| 3.56                      | 80.65  | 82.03  | 89.77  | 85.13  | 93.53    | 3.56            | -0.1246                            | -0.03 | 0.04  | 0.04 | 0.17 |
| 4.56                      | 80.94  | 82.67  | 88.87  | 85.26  | 93.3     | 4.56            | -0.1214                            | -0.02 | 0.03  | 0.04 | 0.17 |
| 5.56                      | 81.89  | 82.73  | 88.12  | 85.79  | 93.13    | 5.56            | -0.1111                            | -0.02 | 0.02  | 0.05 | 0.17 |
| 6.56                      | 80.93  | 82.35  | 87.65  | 85.13  | 93.45    | 6.56            | -0.1216                            | -0.02 | 0.01  | 0.04 | 0.17 |
| 7.56                      | 81.68  | 83.66  | 87.1   | 84.57  | 92.57    | 7.56            | -0.1134                            | -0.01 | 0.01  | 0.04 | 0.16 |
| 8.56                      | 79.24  | 81.88  | 88.15  | 83.56  | 94.09    | 8.56            | -0.1399                            | -0.03 | 0.02  | 0.02 | 0.18 |
| 9.56                      | 80.84  | 82.43  | 88.49  | 84.27  | 93.29    | 9.56            | -0.1225                            | -0.02 | 0.02  | 0.03 | 0.17 |
| 10.56                     | 80.84  | 81.91  | 88.06  | 84.83  | 92.65    | 10.56           | -0.1225                            | -0.03 | 0.02  | 0.04 | 0.16 |
| 11.56                     | 80.59  | 83.49  | 88.58  | 84.73  | 93.75    | 11.56           | -0.1252                            | -0.01 | 0.02  | 0.04 | 0.18 |
| 12.56                     | 80.94  | 82.35  | 85.93  | 84.51  | 93.59    | 12.56           | -0.1214                            | -0.02 | -0.01 | 0.04 | 0.17 |
| 13.56                     | 81.23  | 82.33  | 87.21  | 85.03  | 91.77    | 13.56           | -0.1183                            | -0.02 | 0.01  | 0.04 | 0.15 |
| 14.56                     | 79.91  | 82.51  | 86.83  | 84.82  | 92.09    | 14.56           | -0.1326                            | -0.02 | 0.00  | 0.04 | 0.16 |
| 15.56                     | 80.71  | 82.45  | 87.32  | 84.95  | 92.03    | 15.56           | -0.1239                            | -0.02 | 0.01  | 0.04 | 0.16 |
| 16.58                     | 78.85  | 82.59  | 86.15  | 84.34  | 91.8     | 16.58           | -0.1441                            | -0.02 | 0.00  | 0.03 | 0.15 |
| 17.58                     | 80.29  | 82.14  | 86.22  | 84.96  | 93.4     | 17.58           | -0.1285                            | -0.02 | 0.00  | 0.04 | 0.17 |
| 18.58                     | 79.72  | 82.71  | 87.01  | 84.31  | 94.31    | 18.58           | -0.1347                            | -0.02 | 0.01  | 0.03 | 0.18 |
| 19.58                     | 78.75  | 81.39  | 86.55  | 85.5   | 92.64    | 19.58           | -0.1452                            | -0.03 | 0.00  | 0.05 | 0.16 |
| 20.58                     | 79.93  | 82.68  | 85.66  | 84.54  | 93.13    | 20.58           | -0.1324                            | -0.02 | -0.01 | 0.04 | 0.17 |
| 21.58                     | 80.98  | 83.13  | 86.75  | 86.07  | 92.69    | 21.58           | -0.1210                            | -0.01 | 0.00  | 0.05 | 0.16 |
| 22.58                     | 79.89  | 82.89  | 86.67  | 84.85  | 94.23    | 22.58           | -0.1328                            | -0.01 | 0.00  | 0.04 | 0.18 |
| 23.58                     | 81.18  | 82.76  | 87.55  | 85.8   | 96.14    | 23.58           | -0.1188                            | -0.02 | 0.01  | 0.05 | 0.21 |
| 24.58                     | 81.37  | 83.52  | 88.28  | 86.9   | 95.19    | 24.58           | -0.1168                            | -0.01 | 0.02  | 0.06 | 0.19 |
| 25.58                     | 84.6   | 86.93  | 91.72  | 89.33  | 97.8     | 25.58           | -0.0817                            | 0.03  | 0.06  | 0.09 | 0.23 |
| 26.58                     | 86.71  | 89.53  | 94.82  | 92.02  | 101.22   | 26.58           | -0.0588                            | 0.06  | 0.10  | 0.13 | 0.27 |
| 27.58                     | 93.29  | 96.92  | 103.08 | 98.52  | 108.55   | 27.58           | 0.0126                             | 0.15  | 0.19  | 0.21 | 0.36 |
| 28.56                     | 101.72 | 105.64 | 113.34 | 106.12 | 119.97   | 28.56           | 0.1041                             | 0.26  | 0.31  | 0.30 | 0.51 |
| 29.61                     | 116.88 | 121.05 | 132.26 | 121.82 | 138.04   | 29.61           | 0.2687                             | 0.44  | 0.53  | 0.49 | 0.73 |
| 30.56                     | 133.98 | 138.79 | 153.91 | 136.51 | 155.8    | 30.56           | 0.4543                             | 0.65  | 0.78  | 0.67 | 0.96 |
| 31.63                     | 156.76 | 162.45 | 183.47 | 162.45 | 184.54   | 31.63           | 0.7015                             | 0.93  | 1.12  | 0.99 | 1.32 |
| 32.63                     | 182.68 | 184.57 | 207.25 | 183.02 | 208.79   | 32.63           | 0.9829                             | 1.19  | 1.40  | 1.24 | 1.62 |
| 33.63                     | 206.59 | 208.89 | 240.92 | 210.87 | 239.59   | 33.63           | 1.2424                             | 1.48  | 1.79  | 1.58 | 2.01 |
| 34.63                     | 227.49 | 232.07 | 263.86 | 233.22 | 265.69   | 34.63           | 1.4693                             | 1.76  | 2.05  | 1.86 | 2.33 |
| 35.63                     | 244.54 | 250.69 | 283.67 | 249.02 | 284.54   | 35.63           | 1.6543                             | 1.98  | 2.28  | 2.05 | 2.57 |
| 36.63                     | 261.52 | 263.7  | 305.07 | 266.42 | 304.31   | 36.63           | 1.8386                             | 2.13  | 2.53  | 2.26 | 2.82 |
| 37.65                     | 278.3  | 283.43 | 324.68 | 282.38 | 323.85   | 37.65           | 2.0208                             | 2.37  | 2.76  | 2.46 | 3.06 |
| 38.65                     | 292.23 | 299.4  | 337.16 | 296.97 | 337.77   | 38.65           | 2.1720                             | 2.56  | 2.90  | 2.64 | 3.24 |
| 39.65                     | 303.96 | 307.78 | 351.12 | 307.2  | 351.97   | 39.65           | 2.2993                             | 2.66  | 3.06  | 2.76 | 3.42 |
| <b>Parameter</b>          |        |        |        |        |          |                 |                                    |       |       |      |      |
| <b>a</b>                  | 269.52 | 231.55 | 272.05 | 236.64 | 231.435  |                 |                                    |       |       |      |      |
| <b>b</b>                  | 2.3056 | 2.2735 | 2.2417 | 2.3365 | 2.2716   |                 |                                    |       |       |      |      |
| <b>x0</b>                 | 33.307 | 33.343 | 33.174 | 33.35  | 33.3227  |                 |                                    |       |       |      |      |
| <b>y0</b>                 | 92.129 | 84.134 | 86.448 | 81.609 | 79.6712  |                 |                                    |       |       |      |      |
| <b>R</b>                  | 0.9994 | 0.9994 | 0.9994 | 0.9995 | 0.999537 |                 |                                    |       |       |      |      |
| <b>CP<sub>(SDM)</sub></b> | 30.27  | 30.35  | 30.22  | 30.27  | 30.33    |                 |                                    |       |       |      |      |

| F3                                                   |                                |                                | F4                                                   |                                |                                |                                                      |  |  |
|------------------------------------------------------|--------------------------------|--------------------------------|------------------------------------------------------|--------------------------------|--------------------------------|------------------------------------------------------|--|--|
| Well /<br>Cycle                                      | FAM Normalized<br>Fluorescence | VIC Normalized<br>Fluorescence | Well /<br>Cycle                                      | FAM Normalized<br>Fluorescence | VIC Normalized<br>Fluorescence | Well /<br>Cycle                                      |  |  |
| 0. 56                                                | -0. 034064926                  | -0. 032491181                  | 0. 56                                                | -0. 027445637                  | 0. 008120489                   | 0. 56                                                |  |  |
| 1. 56                                                | -0. 016008325                  | -0. 017633859                  | 1. 56                                                | -0. 01084285                   | 0. 023042754                   | 1. 56                                                |  |  |
| 2. 56                                                | -0. 000992182                  | -0. 014900111                  | 2. 56                                                | 0. 017750839                   | 0. 02350546                    | 2. 56                                                |  |  |
| 3. 56                                                | 0. 002606728                   | -0. 02500309                   | 3. 56                                                | 0. 000225675                   | 0. 038427725                   | 3. 56                                                |  |  |
| 4. 56                                                | 0. 012100405                   | -0. 017396141                  | 4. 56                                                | 0. 006559331                   | 0. 028016842                   | 4. 56                                                |  |  |
| 5. 56                                                | 0. 011728104                   | -0. 01668299                   | 5. 56                                                | 0. 009019003                   | 0. 019341107                   | 5. 56                                                |  |  |
| 6. 56                                                | 0. 020477178                   | -0. 021199616                  | 6. 56                                                | 0. 022424216                   | 0. 013904312                   | 6. 56                                                |  |  |
| 7. 56                                                | 0. 004157982                   | -0. 005629142                  | 7. 56                                                | 0. 0150452                     | 0. 007542106                   | 7. 56                                                |  |  |
| 8. 56                                                | 0. 003971832                   | -0. 026785969                  | 8. 56                                                | 0. 025744773                   | 0. 019688136                   | 8. 56                                                |  |  |
| 9. 56                                                | -0. 001674734                  | -0. 020248747                  | 9. 56                                                | -0. 004939637                  | 0. 023621136                   | 9. 56                                                |  |  |
| 10. 56                                               | 0. 009804548                   | -0. 026429393                  | 10. 56                                               | 0. 004530101                   | 0. 018647048                   | 10. 56                                               |  |  |
| 11. 56                                               | -0. 001116283                  | -0. 007649738                  | 11. 56                                               | -0. 004632178                  | 0. 024662225                   | 11. 56                                               |  |  |
| 12. 56                                               | 0. 008129193                   | -0. 021199616                  | 12. 56                                               | 0. 021624823                   | -0. 005992041                  | 12. 56                                               |  |  |
| 13. 56                                               | -0. 009555106                  | -0. 021437333                  | 13. 56                                               | 0. 014737741                   | 0. 008814547                   | 13. 56                                               |  |  |
| 14. 56                                               | 0. 01414806                    | -0. 019297879                  | 14. 56                                               | 0. 00311579                    | 0. 004418841                   | 14. 56                                               |  |  |
| 15. 56                                               | 0. 000497022                   | -0. 02001103                   | 15. 56                                               | -0. 007952735                  | 0. 010086989                   | 15. 56                                               |  |  |
| 16. 58                                               | -0. 00012348                   | -0. 01834701                   | 16. 58                                               | 0. 013815363                   | -0. 003447159                  | 16. 58                                               |  |  |
| 17. 58                                               | 0. 00347543                    | -0. 023695646                  | 17. 58                                               | -0. 01939021                   | -0. 002637424                  | 17. 58                                               |  |  |
| 18. 58                                               | 0. 020911529                   | -0. 016920707                  | 18. 58                                               | 0. 012278068                   | 0. 006501018                   | 18. 58                                               |  |  |
| 19. 58                                               | 0. 012162455                   | -0. 032610039                  | 19. 58                                               | -0. 012380145                  | 0. 0011799                     | 19. 58                                               |  |  |
| 20. 58                                               | -0. 004963393                  | -0. 017277283                  | 20. 58                                               | -0. 009244063                  | -0. 009115306                  | 20. 58                                               |  |  |
| 21. 58                                               | -0. 005335695                  | -0. 011928647                  | 21. 58                                               | -0. 015516227                  | 0. 00349343                    | 21. 58                                               |  |  |
| 22. 58                                               | 0. 001117524                   | -0. 014781253                  | 22. 58                                               | -0. 000573719                  | 0. 002568018                   | 22. 58                                               |  |  |
| 23. 58                                               | -0. 000992182                  | -0. 016326414                  | 23. 58                                               | -0. 020804522                  | 0. 012747548                   | 23. 58                                               |  |  |
| 24. 58                                               | -0. 001426534                  | -0. 007293162                  | 24. 58                                               | 0. 005821429                   | 0. 02119193                    | 24. 58                                               |  |  |
| 25. 58                                               | -0. 007879752                  | 0. 033237613                   | 25. 58                                               | -0. 006845882                  | 0. 060984638                   | 25. 58                                               |  |  |
| 26. 58                                               | 0. 005026685                   | 0. 064140843                   | 26. 58                                               | 0. 01676697                    | 0. 096844346                   | 26. 58                                               |  |  |
| 27. 58                                               | 0. 007570742                   | 0. 151977331                   | 27. 58                                               | 0. 017074429                   | 0. 192393115                   | 27. 58                                               |  |  |
| 28. 56                                               | 0. 039278381                   | 0. 255622011                   | 28. 56                                               | 0. 036259872                   | 0. 311077179                   | 28. 56                                               |  |  |
| 29. 61                                               | 0. 026309895                   | 0. 438783078                   | 29. 61                                               | 0. 025683282                   | 0. 529937072                   | 29. 61                                               |  |  |
| 30. 56                                               | 0. 095371739                   | 0. 649638194                   | 30. 56                                               | 0. 091418019                   | 0. 780376643                   | 30. 56                                               |  |  |
| 31. 63                                               | 0. 090345675                   | 0. 930857588                   | 31. 63                                               | 0. 089511774                   | 1. 122316306                   | 31. 63                                               |  |  |
| 32. 63                                               | 0. 136821256                   | 1. 193772761                   | 32. 63                                               | 0. 172218249                   | 1. 397394966                   | 32. 63                                               |  |  |
| 33. 63                                               | 0. 166108939                   | 1. 482836821                   | 33. 63                                               | 0. 174862397                   | 1. 786877661                   | 33. 63                                               |  |  |
| 34. 63                                               | 0. 196327374                   | 1. 758351004                   | 34. 63                                               | 0. 227683856                   | 2. 052239497                   | 34. 63                                               |  |  |
| 35. 63                                               | 0. 258191399                   | 1. 979665675                   | 35. 63                                               | 0. 271834971                   | 2. 281394596                   | 35. 63                                               |  |  |
| 36. 63                                               | 0. 29039544                    | 2. 134300684                   | 36. 63                                               | 0. 305962922                   | 2. 528942254                   | 36. 63                                               |  |  |
| 37. 65                                               | 0. 338670476                   | 2. 368808657                   | 37. 65                                               | 0. 349007184                   | 2. 755783824                   | 37. 65                                               |  |  |
| 38. 65                                               | 0. 367461757                   | 2. 558625805                   | 38. 65                                               | 0. 400045381                   | 2. 900148066                   | 38. 65                                               |  |  |
| 39. 65                                               | 0. 408787173                   | 2. 658229292                   | 39. 65                                               | 0. 41910784                    | 3. 061632426                   | 39. 65                                               |  |  |
| Experiment derived linear regression parameter value |                                |                                | Experiment derived linear regression parameter value |                                |                                | Experiment derived linear regression parameter value |  |  |
| y0                                                   | -0. 0036                       |                                | y0                                                   | -0. 0119                       |                                | y0                                                   |  |  |
| a                                                    | 0. 1153                        |                                | a                                                    | 0. 1162                        |                                | a                                                    |  |  |
| R                                                    | 0. 94014058                    |                                | R                                                    | 0. 93256072                    |                                | R                                                    |  |  |

F5

F6

| FAM Normalized<br>Fluorescence       | VIC Normalized<br>Fluorescence | FAM Normalized<br>Fluorescence       | VIC Normalized<br>Fluorescence |
|--------------------------------------|--------------------------------|--------------------------------------|--------------------------------|
| -0.01612574                          | 0.03518248                     | -0.019786358                         | 0.137550332                    |
| -0.025521891                         | 0.040206448                    | -0.012264163                         | 0.176962315                    |
| 0.003055369                          | 0.038368411                    | 0.004571226                          | 0.160017673                    |
| -0.002063913                         | 0.043147308                    | -0.004085268                         | 0.173949934                    |
| 0.009081866                          | 0.044740273                    | 0.017884317                          | 0.171063069                    |
| 0.008174652                          | 0.051234671                    | 0.017108218                          | 0.168929299                    |
| 0.005647411                          | 0.043147308                    | 0.011914321                          | 0.172945807                    |
| 0.008628259                          | 0.036285303                    | 0.019615616                          | 0.161900411                    |
| 0.009081866                          | 0.023909186                    | 0.018660416                          | 0.180978823                    |
| 0.009211468                          | 0.032609228                    | 0.007556224                          | 0.170937553                    |
| 0.003768181                          | 0.039471233                    | 0.007496524                          | 0.162904538                    |
| 0.006360223                          | 0.038245875                    | 0.003854826                          | 0.176711283                    |
| -0.004267149                         | 0.035550088                    | -0.00092117                          | 0.174703029                    |
| -0.011848871                         | 0.04192195                     | -0.010950764                         | 0.151859141                    |
| 0.01925563                           | 0.039348698                    | 0.015914218                          | 0.155875649                    |
| 0.000139322                          | 0.040941663                    | -0.002771869                         | 0.155122554                    |
| 0.00312017                           | 0.033466979                    | 0.012630721                          | 0.152235689                    |
| 0.004221788                          | 0.041064199                    | 0.004392126                          | 0.172318228                    |
| 0.011479505                          | 0.033099372                    | 0.014362019                          | 0.183740172                    |
| -0.003424735                         | 0.047681132                    | -0.006294167                         | 0.162779022                    |
| -0.000508688                         | 0.035917695                    | -0.007607566                         | 0.168929299                    |
| -0.001545505                         | 0.054665673                    | -0.019428158                         | 0.163406601                    |
| 0.005453008                          | 0.039716305                    | 0.002362327                          | 0.182736045                    |
| -0.001675107                         | 0.051357207                    | -0.019965458                         | 0.206709576                    |
| 0.009081866                          | 0.064836145                    | -0.000682371                         | 0.194785569                    |
| -0.006405583                         | 0.094612346                    | -0.018711758                         | 0.227545211                    |
| 0.004804997                          | 0.127574477                    | 0.010421822                          | 0.270471638                    |
| 0.007656243                          | 0.20722275                     | 0.014541119                          | 0.362474771                    |
| 0.027614965                          | 0.300349962                    | 0.040630002                          | 0.505813895                    |
| 0.02294929                           | 0.492731176                    | 0.046599998                          | 0.732621073                    |
| 0.071420471                          | 0.672736274                    | 0.081942374                          | 0.955537258                    |
| 0.080492618                          | 0.990594152                    | 0.109762555                          | 1.316269869                    |
| 0.139720772                          | 1.242650302                    | 0.16289552                           | 1.620645854                    |
| 0.147496898                          | 1.583912519                    | 0.179074209                          | 2.007234735                    |
| 0.183072671                          | 1.857780043                    | 0.233639972                          | 2.334831156                    |
| 0.206336246                          | 2.051386615                    | 0.267907749                          | 2.571428571                    |
| 0.263944375                          | 2.264598916                    | 0.297996529                          | 2.819573447                    |
| 0.286495138                          | 2.460166061                    | 0.348502695                          | 3.064831457                    |
| 0.318442053                          | 2.6389458                      | 0.38671067                           | 3.239549549                    |
| 0.344751277                          | 2.764299928                    | 0.420500847                          | 3.417782084                    |
| Experiment derived linear regression |                                | Experiment derived linear regression |                                |
| value                                | SD                             | parameter                            | value                          |
| -0.0178                              | 0.0129                         | y0                                   | -0.0251                        |
| 0.117                                | 0.0172                         | a                                    | 0.1105                         |
| <b>0.95932913</b>                    |                                | <b>R</b>                             | <b>0.98704815</b>              |
| AVERAGE                              | value                          | SD2                                  |                                |
| y0                                   | -0.01322                       |                                      |                                |
| a                                    | 0.12516                        | 0.023414162                          |                                |

| Well /<br>Cycle           | Raw fluorescence data |        |        |        |        | Well /<br>Cycle | F7      | F8    | F9    | G2    | G3    |
|---------------------------|-----------------------|--------|--------|--------|--------|-----------------|---------|-------|-------|-------|-------|
|                           | F7                    | F8     | F9     | G2     | G3     |                 |         |       |       |       |       |
| 0.56                      | 142.62                | 159.64 | 147.69 | 166.96 | 148.97 | 0.56            | -0.0362 | -0.03 | -0.04 | -0.02 | -0.04 |
| 1.56                      | 144.97                | 164.56 | 151.07 | 173.07 | 153.11 | 1.56            | -0.0204 | 0.00  | -0.01 | 0.01  | -0.02 |
| 2.56                      | 145.78                | 167.03 | 150.74 | 172.03 | 153.87 | 2.56            | -0.0149 | 0.02  | -0.02 | 0.00  | -0.01 |
| 3.56                      | 144.44                | 167.70 | 152.42 | 175.53 | 153.62 | 3.56            | -0.0239 | 0.02  | 0.00  | 0.03  | -0.01 |
| 4.56                      | 149.75                | 168.07 | 154.36 | 179.79 | 159.65 | 4.56            | 0.0119  | 0.02  | 0.01  | 0.05  | 0.03  |
| 5.56                      | 146.52                | 167.38 | 154.01 | 175.41 | 156.98 | 5.56            | -0.0099 | 0.02  | 0.01  | 0.02  | 0.01  |
| 6.56                      | 150.29                | 166.79 | 156.06 | 175.90 | 158.46 | 6.56            | 0.0156  | 0.02  | 0.02  | 0.03  | 0.02  |
| 7.56                      | 148.44                | 168.08 | 153.75 | 172.46 | 156.76 | 7.56            | 0.0031  | 0.02  | 0.00  | 0.01  | 0.01  |
| 8.56                      | 149.11                | 166.68 | 155.67 | 171.20 | 155.14 | 8.56            | 0.0076  | 0.02  | 0.02  | 0.00  | 0.00  |
| 9.56                      | 147.78                | 165.47 | 154.08 | 171.17 | 158.92 | 9.56            | -0.0014 | 0.01  | 0.01  | 0.00  | 0.02  |
| 10.56                     | 151.65                | 166.26 | 154.94 | 173.23 | 157.71 | 10.56           | 0.0248  | 0.01  | 0.01  | 0.01  | 0.01  |
| 11.56                     | 148.90                | 166.33 | 153.58 | 173.78 | 159.04 | 11.56           | 0.0062  | 0.01  | 0.00  | 0.01  | 0.02  |
| 12.56                     | 148.98                | 164.19 | 154.62 | 174.84 | 159.41 | 12.56           | 0.0067  | 0.00  | 0.01  | 0.02  | 0.02  |
| 13.56                     | 148.96                | 165.07 | 152.35 | 170.29 | 156.17 | 13.56           | 0.0066  | 0.01  | 0.00  | -0.01 | 0.00  |
| 14.56                     | 148.27                | 165.29 | 154.55 | 174.47 | 156.16 | 14.56           | 0.0019  | 0.01  | 0.01  | 0.02  | 0.00  |
| 15.56                     | 147.22                | 163.95 | 153.78 | 170.95 | 155.66 | 15.56           | -0.0052 | 0.00  | 0.00  | 0.00  | 0.00  |
| 16.58                     | 150.27                | 162.32 | 152.99 | 172.85 | 156.00 | 16.58           | 0.0154  | -0.01 | 0.00  | 0.01  | 0.00  |
| 17.58                     | 148.48                | 162.55 | 152.05 | 169.82 | 155.73 | 17.58           | 0.0034  | -0.01 | -0.01 | -0.01 | 0.00  |
| 18.58                     | 149.83                | 164.16 | 154.55 | 171.35 | 157.66 | 18.58           | 0.0125  | 0.00  | 0.01  | 0.00  | 0.01  |
| 19.58                     | 147.83                | 162.36 | 152.83 | 168.86 | 155.82 | 19.58           | -0.0010 | -0.01 | 0.00  | -0.01 | 0.00  |
| 20.58                     | 149.02                | 162.11 | 153.37 | 168.87 | 155.34 | 20.58           | 0.0070  | -0.01 | 0.00  | -0.01 | 0.00  |
| 21.58                     | 149.88                | 161.94 | 151.05 | 168.40 | 153.26 | 21.58           | 0.0128  | -0.01 | -0.01 | -0.02 | -0.01 |
| 22.58                     | 150.29                | 163.66 | 152.79 | 170.63 | 154.08 | 22.58           | 0.0156  | 0.00  | 0.00  | 0.00  | -0.01 |
| 23.58                     | 147.17                | 162.20 | 153.56 | 166.02 | 154.30 | 23.58           | -0.0055 | -0.01 | 0.00  | -0.03 | -0.01 |
| 24.58                     | 147.83                | 161.12 | 153.24 | 164.54 | 155.08 | 24.58           | -0.0010 | -0.02 | 0.00  | -0.04 | 0.00  |
| 25.58                     | 147.02                | 159.91 | 152.72 | 165.30 | 150.40 | 25.58           | -0.0065 | -0.03 | 0.00  | -0.03 | -0.03 |
| 26.58                     | 149.98                | 164.02 | 152.95 | 166.50 | 154.06 | 26.58           | 0.0135  | 0.00  | 0.00  | -0.03 | -0.01 |
| 27.58                     | 150.18                | 160.52 | 151.67 | 168.62 | 154.75 | 27.58           | 0.0148  | -0.02 | -0.01 | -0.02 | -0.01 |
| 28.56                     | 153.26                | 163.45 | 154.60 | 172.38 | 154.93 | 28.56           | 0.0357  | 0.00  | 0.01  | 0.01  | 0.00  |
| 29.61                     | 149.47                | 160.65 | 155.33 | 169.59 | 157.83 | 29.61           | 0.0100  | -0.02 | 0.01  | -0.01 | 0.01  |
| 30.56                     | 157.00                | 165.69 | 156.74 | 177.95 | 161.63 | 30.56           | 0.0609  | 0.01  | 0.02  | 0.04  | 0.04  |
| 31.63                     | 152.23                | 163.62 | 156.80 | 172.76 | 159.74 | 31.63           | 0.0287  | 0.00  | 0.02  | 0.01  | 0.03  |
| 32.63                     | 159.24                | 169.49 | 159.63 | 179.46 | 164.54 | 32.63           | 0.0761  | 0.03  | 0.04  | 0.05  | 0.06  |
| 33.63                     | 158.91                | 166.52 | 157.92 | 178.98 | 163.57 | 33.63           | 0.0738  | 0.01  | 0.03  | 0.05  | 0.05  |
| 34.63                     | 160.58                | 170.07 | 161.02 | 181.54 | 167.59 | 34.63           | 0.0851  | 0.04  | 0.05  | 0.06  | 0.08  |
| 35.63                     | 164.41                | 170.55 | 164.10 | 182.17 | 167.64 | 35.63           | 0.1110  | 0.04  | 0.07  | 0.06  | 0.08  |
| 36.63                     | 168.69                | 176.51 | 169.01 | 189.46 | 174.41 | 36.63           | 0.1399  | 0.08  | 0.10  | 0.11  | 0.12  |
| 37.65                     | 172.25                | 176.15 | 168.53 | 188.51 | 180.62 | 37.65           | 0.1640  | 0.07  | 0.10  | 0.10  | 0.16  |
| 38.65                     | 176.75                | 179.03 | 170.38 | 191.15 | 180.99 | 38.65           | 0.1944  | 0.09  | 0.11  | 0.12  | 0.16  |
| 39.65                     | 176.84                | 177.28 | 173.89 | 193.40 | 181.07 | 39.65           | 0.1950  | 0.08  | 0.14  | 0.13  | 0.16  |
| <b>Parameter</b>          |                       |        |        |        |        |                 |         |       |       |       |       |
| <b>a</b>                  | 44.94                 | 14.60  | 25.03  | 23.06  | 31.03  |                 |         |       |       |       |       |
| <b>b</b>                  | 3.34                  | 1.31   | 2.48   | 1.90   | 2.17   |                 |         |       |       |       |       |
| <b>x0</b>                 | 37.26                 | 35.27  | 36.16  | 34.97  | 35.65  |                 |         |       |       |       |       |
| <b>y0</b>                 | 147.98                | 164.17 | 153.12 | 171.21 | 155.59 |                 |         |       |       |       |       |
| <b>R</b>                  | 0.97                  | 0.87   | 0.96   | 0.88   | 0.95   |                 |         |       |       |       |       |
| <b>CP<sub>(SDM)</sub></b> | 32.86                 | 33.55  | 32.89  | 32.47  | 32.79  |                 |         |       |       |       |       |

| Well /<br>Cycle           | F7     | F8     | F9     | G2     | G3        | Well /<br>Cycle | Fluorescence Data Normalized To Y0 |       |       |       |       |
|---------------------------|--------|--------|--------|--------|-----------|-----------------|------------------------------------|-------|-------|-------|-------|
|                           |        |        |        |        |           |                 | F7                                 | F8    | F9    | G2    | G3    |
| 0.56                      | 88.53  | 89.11  | 83.82  | 83.51  | 82.16     | 0.56            | -0.0108                            | 0.00  | -0.01 | -0.02 | -0.03 |
| 1.56                      | 90.27  | 90.3   | 84.51  | 87.54  | 84.16     | 1.56            | 0.0086                             | 0.02  | 0.00  | 0.03  | 0.00  |
| 2.56                      | 88.2   | 90.49  | 85.22  | 85.52  | 85.39     | 2.56            | -0.0145                            | 0.02  | 0.01  | 0.01  | 0.01  |
| 3.56                      | 90.84  | 90.76  | 84.24  | 86.37  | 84.08     | 3.56            | 0.0150                             | 0.02  | 0.00  | 0.02  | 0.00  |
| 4.56                      | 90.58  | 91.45  | 84.09  | 85.26  | 83.96     | 4.56            | 0.0121                             | 0.03  | 0.00  | 0.01  | 0.00  |
| 5.56                      | 90.22  | 90.25  | 84.8   | 86.73  | 84.87     | 5.56            | 0.0081                             | 0.02  | 0.01  | 0.02  | 0.01  |
| 6.56                      | 89.3   | 90.3   | 84.11  | 85.95  | 85        | 6.56            | -0.0022                            | 0.02  | 0.00  | 0.01  | 0.01  |
| 7.56                      | 89.68  | 90.26  | 85.84  | 86.71  | 85.88     | 7.56            | 0.0020                             | 0.02  | 0.02  | 0.02  | 0.02  |
| 8.56                      | 91.06  | 89.64  | 86.25  | 85.5   | 85.91     | 8.56            | 0.0174                             | 0.01  | 0.02  | 0.01  | 0.02  |
| 9.56                      | 91.22  | 90.36  | 85.67  | 86.25  | 86.31     | 9.56            | 0.0192                             | 0.02  | 0.02  | 0.02  | 0.02  |
| 10.56                     | 90.93  | 89.77  | 85.25  | 85.51  | 85.07     | 10.56           | 0.0160                             | 0.01  | 0.01  | 0.01  | 0.01  |
| 11.56                     | 91.84  | 89.57  | 85.84  | 86.09  | 85.43     | 11.56           | 0.0262                             | 0.01  | 0.02  | 0.02  | 0.01  |
| 12.56                     | 90.82  | 89.57  | 84.49  | 86.01  | 85.07     | 12.56           | 0.0148                             | 0.01  | 0.00  | 0.01  | 0.01  |
| 13.56                     | 91.54  | 89.08  | 85.84  | 86.32  | 85.79     | 13.56           | 0.0228                             | 0.00  | 0.02  | 0.02  | 0.02  |
| 14.56                     | 90.94  | 88.83  | 84.97  | 85.57  | 86.27     | 14.56           | 0.0161                             | 0.00  | 0.01  | 0.01  | 0.02  |
| 15.56                     | 91.53  | 88.08  | 86.15  | 86.5   | 85.47     | 15.56           | 0.0227                             | -0.01 | 0.02  | 0.02  | 0.01  |
| 16.58                     | 90.43  | 90.74  | 85.51  | 85.18  | 86.35     | 16.58           | 0.0104                             | 0.02  | 0.01  | 0.00  | 0.02  |
| 17.58                     | 90.63  | 89.77  | 85.54  | 86.01  | 85.6      | 17.58           | 0.0126                             | 0.01  | 0.02  | 0.01  | 0.02  |
| 18.58                     | 90.97  | 88.8   | 84.97  | 85.65  | 85.48     | 18.58           | 0.0164                             | 0.00  | 0.01  | 0.01  | 0.01  |
| 19.58                     | 90.83  | 89.1   | 85.78  | 86.07  | 84.59     | 19.58           | 0.0149                             | 0.00  | 0.02  | 0.02  | 0.00  |
| 20.58                     | 90.72  | 88.28  | 85.07  | 85.91  | 85.08     | 20.58           | 0.0136                             | -0.01 | 0.01  | 0.01  | 0.01  |
| 21.58                     | 90.86  | 89.15  | 85.1   | 86.82  | 84.71     | 21.58           | 0.0152                             | 0.00  | 0.01  | 0.02  | 0.00  |
| 22.58                     | 93.05  | 88.91  | 85.66  | 85.47  | 85.6      | 22.58           | 0.0397                             | 0.00  | 0.02  | 0.01  | 0.02  |
| 23.58                     | 92.84  | 89.87  | 86.62  | 86.79  | 86.75     | 23.58           | 0.0373                             | 0.01  | 0.03  | 0.02  | 0.03  |
| 24.58                     | 95.68  | 89.91  | 86.8   | 87.53  | 87.54     | 24.58           | 0.0691                             | 0.01  | 0.03  | 0.03  | 0.04  |
| 25.58                     | 99.57  | 92.87  | 89.61  | 90.96  | 91        | 25.58           | 0.1125                             | 0.05  | 0.06  | 0.07  | 0.08  |
| 26.58                     | 104.66 | 96.64  | 92.93  | 96.74  | 93.42     | 26.58           | 0.1694                             | 0.09  | 0.10  | 0.14  | 0.11  |
| 27.58                     | 116.83 | 104.67 | 100.19 | 106.9  | 99.98     | 27.58           | 0.3054                             | 0.18  | 0.19  | 0.26  | 0.19  |
| 28.56                     | 133.17 | 114.6  | 110.58 | 120.71 | 109.09    | 28.56           | 0.4879                             | 0.29  | 0.31  | 0.42  | 0.29  |
| 29.61                     | 156.34 | 131.51 | 127.11 | 142.42 | 125.87    | 29.61           | 0.7468                             | 0.48  | 0.51  | 0.68  | 0.49  |
| 30.56                     | 181.53 | 148.58 | 142.94 | 163.75 | 146.1     | 30.56           | 1.0283                             | 0.67  | 0.70  | 0.93  | 0.73  |
| 31.63                     | 215.53 | 174.99 | 162.97 | 191.23 | 170.62    | 31.63           | 1.4082                             | 0.97  | 0.93  | 1.26  | 1.02  |
| 32.63                     | 238.74 | 198.67 | 182.27 | 214.2  | 193.05    | 32.63           | 1.6675                             | 1.24  | 1.16  | 1.53  | 1.29  |
| 33.63                     | 269.47 | 225.15 | 204.39 | 242.08 | 218.69    | 33.63           | 2.0109                             | 1.54  | 1.43  | 1.85  | 1.59  |
| 34.63                     | 290.84 | 248.86 | 221.22 | 261.6  | 238.3     | 34.63           | 2.2496                             | 1.80  | 1.63  | 2.09  | 1.83  |
| 35.63                     | 311.7  | 271.71 | 240.2  | 277.73 | 256.82    | 35.63           | 2.4827                             | 2.06  | 1.85  | 2.28  | 2.05  |
| 36.63                     | 324.99 | 284.41 | 252.02 | 293.78 | 272.14    | 36.63           | 2.6312                             | 2.20  | 1.99  | 2.46  | 2.23  |
| 37.65                     | 342.08 | 301.9  | 267.79 | 310.78 | 288.29    | 37.65           | 2.8222                             | 2.40  | 2.18  | 2.67  | 2.42  |
| 38.65                     | 355.26 | 315.12 | 278.01 | 323.5  | 301.93    | 38.65           | 2.9694                             | 2.55  | 2.30  | 2.82  | 2.58  |
| 39.65                     | 369.93 | 329.21 | 291.8  | 333.32 | 313.7     | 39.65           | 3.1333                             | 2.71  | 2.46  | 2.93  | 2.72  |
| <b>Parameter</b>          |        |        |        |        |           |                 |                                    |       |       |       |       |
| <b>a</b>                  | 282.47 | 246.66 | 214.65 | 252.97 | 235.8485  |                 |                                    |       |       |       |       |
| <b>b</b>                  | 2.324  | 2.259  | 2.4356 | 2.3159 | 2.3095    |                 |                                    |       |       |       |       |
| <b>x0</b>                 | 32.39  | 33.206 | 33.141 | 32.576 | 33.1058   |                 |                                    |       |       |       |       |
| <b>y0</b>                 | 89.499 | 88.781 | 84.253 | 84.792 | 84.3201   |                 |                                    |       |       |       |       |
| <b>R</b>                  | 0.9994 | 0.9994 | 0.9993 | 0.9993 | 0.9993728 |                 |                                    |       |       |       |       |
| <b>CP<sub>(SDM)</sub></b> | 29.33  | 30.23  | 29.93  | 29.53  | 30.06     |                 |                                    |       |       |       |       |

| F7              |                                |                                | F8              |                                |                                |                 |
|-----------------|--------------------------------|--------------------------------|-----------------|--------------------------------|--------------------------------|-----------------|
| Well /<br>Cycle | FAM Normalized<br>Fluorescence | VIC Normalized<br>Fluorescence | Well /<br>Cycle | FAM Normalized<br>Fluorescence | VIC Normalized<br>Fluorescence | Well /<br>Cycle |
| 0.56            | -0.036245859                   | -0.010830252                   | 0.56            | -0.027620002                   | 0.003702356                    | 0.56            |
| 1.56            | -0.020365743                   | 0.008611241                    | 1.56            | 0.002348111                    | 0.01710608                     | 1.56            |
| 2.56            | -0.014892171                   | -0.014517432                   | 2.56            | 0.017393079                    | 0.01924617                     | 2.56            |
| 3.56            | -0.023947216                   | 0.014980005                    | 3.56            | 0.021474102                    | 0.022287351                    | 3.56            |
| 4.56            | 0.01193509                     | 0.012074955                    | 4.56            | 0.023727802                    | 0.030059258                    | 4.56            |
| 5.56            | -0.009891623                   | 0.008052577                    | 5.56            | 0.019524957                    | 0.016542898                    | 5.56            |
| 6.56            | 0.015584138                    | -0.002226833                   | 6.56            | 0.01593122                     | 0.01710608                     | 6.56            |
| 7.56            | 0.00308277                     | 0.00201901                     | 7.56            | 0.023788713                    | 0.016655534                    | 7.56            |
| 8.56            | 0.007610292                    | 0.017438125                    | 8.56            | 0.015261201                    | 0.009672082                    | 8.56            |
| 9.56            | -0.001377178                   | 0.019225849                    | 9.56            | 0.007890994                    | 0.017781898                    | 9.56            |
| 10.56           | 0.024774333                    | 0.0159856                      | 10.56           | 0.012702947                    | 0.011136354                    | 10.56           |
| 11.56           | 0.006191218                    | 0.026153277                    | 11.56           | 0.013129323                    | 0.008883628                    | 11.56           |
| 12.56           | 0.006731818                    | 0.01475654                     | 12.56           | 9.44117E-05                    | 0.008883628                    | 12.56           |
| 13.56           | 0.006596668                    | 0.022801296                    | 13.56           | 0.005454562                    | 0.003364447                    | 13.56           |
| 14.56           | 0.001933995                    | 0.016097333                    | 14.56           | 0.0067946                      | 0.000548539                    | 14.56           |
| 15.56           | -0.005161376                   | 0.022689563                    | 15.56           | -0.001367447                   | -0.007899186                   | 15.56           |
| 16.58           | 0.015448988                    | 0.010398964                    | 16.58           | -0.011295908                   | 0.022062078                    | 16.58           |
| 17.58           | 0.00335307                     | 0.012633618                    | 17.58           | -0.009894959                   | 0.011136354                    | 17.58           |
| 18.58           | 0.01247569                     | 0.016432531                    | 18.58           | -8.83207E-05                   | 0.00021063                     | 18.58           |
| 19.58           | -0.001039303                   | 0.014868273                    | 19.58           | -0.011052265                   | 0.00358972                     | 19.58           |
| 20.58           | 0.007002118                    | 0.013639213                    | 20.58           | -0.012575034                   | -0.005646459                   | 20.58           |
| 21.58           | 0.012813565                    | 0.015203471                    | 21.58           | -0.013610518                   | 0.004152902                    | 21.58           |
| 22.58           | 0.015584138                    | 0.039672936                    | 22.58           | -0.003133861                   | 0.00144963                     | 22.58           |
| 23.58           | -0.005499251                   | 0.037326549                    | 23.58           | -0.012026837                   | 0.012262717                    | 23.58           |
| 24.58           | -0.001039303                   | 0.069058641                    | 24.58           | -0.018605204                   | 0.012713263                    | 24.58           |
| 25.58           | -0.006512875                   | 0.112522668                    | 25.58           | -0.02597541                    | 0.046053617                    | 25.58           |
| 26.58           | 0.013489314                    | 0.169394621                    | 26.58           | -0.000941072                   | 0.088517514                    | 26.58           |
| 27.58           | 0.014840814                    | 0.305373338                    | 27.58           | -0.022259852                   | 0.178964489                    | 27.58           |
| 28.56           | 0.035653903                    | 0.487944598                    | 28.56           | -0.004412987                   | 0.290812367                    | 28.56           |
| 29.61           | 0.010042991                    | 0.746829305                    | 29.61           | -0.021468011                   | 0.481280405                    | 29.61           |
| 30.56           | 0.060926939                    | 1.02828402                     | 30.56           | 0.009231032                    | 0.673550624                    | 30.56           |
| 31.63           | 0.028693681                    | 1.408175259                    | 31.63           | -0.003377504                   | 0.971023177                    | 31.63           |
| 32.63           | 0.076063731                    | 1.667506897                    | 32.63           | 0.032377135                    | 1.237746012                    | 32.63           |
| 33.63           | 0.073833757                    | 2.010861537                    | 33.63           | 0.014286628                    | 1.536007019                    | 33.63           |
| 34.63           | 0.085118777                    | 2.249634355                    | 34.63           | 0.035909962                    | 1.803067763                    | 34.63           |
| 35.63           | 0.110999988                    | 2.482708803                    | 35.63           | 0.03883368                     | 2.060441782                    | 35.63           |
| 36.63           | 0.139922073                    | 2.631201585                    | 36.63           | 0.075136516                    | 2.203489924                    | 36.63           |
| 37.65           | 0.16397876                     | 2.822152799                    | 37.65           | 0.072943728                    | 2.400490869                    | 37.65           |
| 38.65           | 0.194387494                    | 2.969416521                    | 38.65           | 0.090486038                    | 2.5493961                      | 38.65           |
| 39.65           | 0.194995668                    | 3.133328417                    | 39.65           | 0.079826648                    | 2.708100692                    | 39.65           |

| Experiment derived linear regression |            |
|--------------------------------------|------------|
| parameter                            | value      |
| y0                                   | -0.0093    |
| a                                    | 0.0431     |
| R                                    | 0.73998972 |

| Experiment derived linear regression |            |
|--------------------------------------|------------|
| parameter                            | value      |
| y0                                   | -0.0268    |
| a                                    | 0.0337     |
| R                                    | 0.71003981 |

| Experiment derived linear regression |       |
|--------------------------------------|-------|
| parameter                            | value |
| y0                                   |       |
| a                                    |       |
| R                                    |       |

| F9                          |                             |              | G2                          |                             | G3                          |                             |  |
|-----------------------------|-----------------------------|--------------|-----------------------------|-----------------------------|-----------------------------|-----------------------------|--|
| FAM Normalized Fluorescence | VIC Normalized Fluorescence | Well / Cycle | FAM Normalized Fluorescence | VIC Normalized Fluorescence | FAM Normalized Fluorescence | VIC Normalized Fluorescence |  |
| -0.035430885                | -0.005142825                | 0.56         | -0.024850086                | -0.015118189                | -0.042556337                | -0.025617854                |  |
| -0.013355974                | 0.003046765                 | 1.56         | 0.010836102                 | 0.032409935                 | -0.015948182                | -0.001898717                |  |
| -0.015511217                | 0.011473735                 | 2.56         | 0.004761857                 | 0.008586905                 | -0.011063593                | 0.012688552                 |  |
| -0.004539072                | -0.000157857                | 3.56         | 0.025204027                 | 0.018611448                 | -0.012670366                | -0.002847482                |  |
| 0.008131143                 | -0.001938203                | 4.56         | 0.050085069                 | 0.005520574                 | 0.026084989                 | -0.004270631                |  |
| 0.00584528                  | 0.006488767                 | 5.56         | 0.024503153                 | 0.022857136                 | 0.008924658                 | 0.006521577                 |  |
| 0.019233909                 | -0.001700824                | 6.56         | 0.027365057                 | 0.013658144                 | 0.018436752                 | 0.008063321                 |  |
| 0.00414721                  | 0.018832497                 | 7.56         | 0.007273324                 | 0.022621265                 | 0.007510698                 | 0.018499741                 |  |
| 0.016686804                 | 0.023698775                 | 8.56         | -8.58571E-05                | 0.008351034                 | -0.002901189                | 0.018855528                 |  |
| 0.006302452                 | 0.016814772                 | 9.56         | -0.000261076                | 0.017196218                 | 0.021393213                 | 0.023599355                 |  |
| 0.011919146                 | 0.011829804                 | 10.56        | 0.011770601                 | 0.008468969                 | 0.013616434                 | 0.00889349                  |  |
| 0.003036933                 | 0.018832497                 | 11.56        | 0.014982942                 | 0.015309245                 | 0.022164464                 | 0.013162935                 |  |
| 0.009829213                 | 0.002809386                 | 12.56        | 0.021174                    | 0.014365759                 | 0.024542488                 | 0.00889349                  |  |
| -0.004996245                | 0.018832497                 | 13.56        | -0.005400821                | 0.018021769                 | 0.003718715                 | 0.01743238                  |  |
| 0.009372041                 | 0.008506492                 | 14.56        | 0.01901297                  | 0.009176584                 | 0.003654444                 | 0.023124973                 |  |
| 0.004343141                 | 0.022511878                 | 15.56        | -0.001546012                | 0.020144613                 | 0.000440898                 | 0.013637318                 |  |
| -0.00081638                 | 0.014915736                 | 16.58        | 0.009551166                 | 0.004577088                 | 0.002626109                 | 0.024073738                 |  |
| -0.006955556                | 0.015271805                 | 17.58        | -0.008145913                | 0.014365759                 | 0.000890795                 | 0.015179062                 |  |
| 0.009372041                 | 0.008506492                 | 18.58        | 0.000790236                 | 0.01012007                  | 0.013295079                 | 0.013755913                 |  |
| -0.001861346                | 0.018120358                 | 19.58        | -0.013752908                | 0.015073374                 | 0.001469233                 | 0.003200898                 |  |
| 0.001665415                 | 0.009693389                 | 20.58        | -0.013694502                | 0.013186401                 | -0.001615771                | 0.009012086                 |  |
| -0.013486595                | 0.010049458                 | 21.58        | -0.016439593                | 0.023918558                 | -0.014984119                | 0.004624046                 |  |
| -0.002122588                | 0.016696082                 | 22.58        | -0.003415011                | 0.007997226                 | -0.009713904                | 0.015179062                 |  |
| 0.002906312                 | 0.028090294                 | 23.58        | -0.030340269                | 0.023564751                 | -0.008299945                | 0.028817565                 |  |
| 0.00081638                  | 0.030226709                 | 24.58        | -0.038984386                | 0.032292                    | -0.003286814                | 0.038186625                 |  |
| -0.00257976                 | 0.063578519                 | 25.58        | -0.034545515                | 0.072743977                 | -0.033365597                | 0.079220731                 |  |
| -0.001077621                | 0.102983503                 | 26.58        | -0.027536771                | 0.140910865                 | -0.009842446                | 0.107920887                 |  |
| -0.009437351                | 0.189152235                 | 27.58        | -0.015154657                | 0.260733631                 | -0.005407754                | 0.185719656                 |  |
| 0.009698593                 | 0.312470847                 | 28.56        | 0.006806074                 | 0.423602962                 | -0.004250878                | 0.293760325                 |  |
| 0.014466251                 | 0.508664943                 | 29.61        | -0.009489255                | 0.67964157                  | 0.014387685                 | 0.492763884                 |  |
| 0.023675016                 | 0.696550758                 | 30.56        | 0.039338328                 | 0.931198617                 | 0.038810628                 | 0.732682955                 |  |
| 0.024066878                 | 0.934286253                 | 31.63        | 0.00902551                  | 1.255286177                 | 0.026663427                 | 1.023479574                 |  |
| 0.042549718                 | 1.1633574                   | 32.63        | 0.048157664                 | 1.526184695                 | 0.057513462                 | 1.289489695                 |  |
| 0.031381641                 | 1.425899045                 | 33.63        | 0.045354166                 | 1.854989687                 | 0.051279184                 | 1.59356903                  |  |
| 0.051627861                 | 1.625653832                 | 34.63        | 0.060306154                 | 2.085200355                 | 0.077116087                 | 1.826135168                 |  |
| 0.071743461                 | 1.850926907                 | 35.63        | 0.063985744                 | 2.27543079                  | 0.077437442                 | 2.045774376                 |  |
| 0.103810861                 | 1.991218148                 | 36.63        | 0.106563864                 | 2.464717738                 | 0.120948844                 | 2.227462966                 |  |
| 0.100675963                 | 2.178391826                 | 37.65        | 0.101015275                 | 2.665208587                 | 0.160861076                 | 2.418994996                 |  |
| 0.112758384                 | 2.299692712                 | 38.65        | 0.116434512                 | 2.815222916                 | 0.163239099                 | 2.58075951                  |  |
| 0.13568233                  | 2.463365827                 | 39.65        | 0.129575907                 | 2.931035865                 | 0.163753267                 | 2.720346631                 |  |

|                        |
|------------------------|
| derived linear regress |
| value                  |
| 0.0062                 |
| 0.0223                 |
| 0.77591708             |

|                                 |           |        |
|---------------------------------|-----------|--------|
| periment derived linear regress |           |        |
| parameter                       | value     | SD     |
| y0                              | -0.022    | 0.0292 |
| a                               | 0.0388    | 0.0222 |
| R                               | 0.7108714 |        |

|                                   |            |
|-----------------------------------|------------|
| xperiment derived linear regressi |            |
| parameter                         | value      |
| y0                                | 0.004      |
| a                                 | 0.0329     |
| R                                 | 0.81417076 |

|         |          |             |
|---------|----------|-------------|
| AVERAGE | value    | SD2         |
| y0      | -0.00958 |             |
| a       | 0.03416  | 0.007808841 |
