# Supplementary material for: Quantify single nucleotide polymorphism (SNP) ratio in pooled DNA based on normalized fluorescence real-time PCR
Source: PubMed Central journal article supplement (PMC1552069; doi:10.1186/1471-2164-7-143), 2006-06-09
Supplement: 1471-2164-7-143-S3.pdf [file 1471-2164-7-143-S3.pdf]

| Well /<br>Cycle           | Raw fluorescence data |           |           |           | Well /<br>Cycle | C2 Normalized |       |       |       |
|---------------------------|-----------------------|-----------|-----------|-----------|-----------------|---------------|-------|-------|-------|
|                           | C2 sample             | C3 sample | C4 sample | C5 sample |                 | Fluorescence  | C3    | C4    | C5    |
| 0.56                      | 374.20                | 410.83    | 478.36    | 418.37    | 0.56            | -0.0321       | -0.04 | -0.02 | -0.02 |
| 1.56                      | 373.70                | 420.19    | 487.86    | 425.06    | 1.56            | -0.0334       | -0.02 | 0.00  | 0.00  |
| 2.56                      | 373.22                | 417.79    | 479.27    | 414.66    | 2.56            | -0.0346       | -0.03 | -0.02 | -0.03 |
| 3.56                      | 381.71                | 426.28    | 485.53    | 424.35    | 3.56            | -0.0126       | -0.01 | -0.01 | 0.00  |
| 4.56                      | 378.90                | 423.25    | 489.46    | 417.81    | 4.56            | -0.0199       | -0.01 | 0.00  | -0.02 |
| 5.56                      | 380.32                | 421.94    | 487.72    | 423.27    | 5.56            | -0.0162       | -0.02 | 0.00  | -0.01 |
| 6.56                      | 388.67                | 433.44    | 496.52    | 426.48    | 6.56            | 0.0054        | 0.01  | 0.01  | 0.00  |
| 7.56                      | 382.62                | 426.25    | 492.81    | 422.73    | 7.56            | -0.0103       | -0.01 | 0.01  | -0.01 |
| 8.56                      | 394.06                | 435.85    | 498.88    | 427.40    | 8.56            | 0.0193        | 0.02  | 0.02  | 0.00  |
| 9.56                      | 390.59                | 428.75    | 492.71    | 427.76    | 9.56            | 0.0103        | 0.00  | 0.01  | 0.00  |
| 10.56                     | 399.17                | 435.72    | 501.27    | 433.28    | 10.56           | 0.0325        | 0.02  | 0.02  | 0.02  |
| 11.56                     | 390.59                | 433.93    | 491.38    | 430.09    | 11.56           | 0.0103        | 0.01  | 0.00  | 0.01  |
| 12.56                     | 401.18                | 439.89    | 503.02    | 438.09    | 12.56           | 0.0377        | 0.03  | 0.03  | 0.03  |
| 13.56                     | 393.02                | 443.39    | 507.21    | 435.42    | 13.56           | 0.0166        | 0.03  | 0.03  | 0.02  |
| 14.56                     | 397.51                | 439.53    | 503.02    | 438.54    | 14.56           | 0.0282        | 0.03  | 0.03  | 0.03  |
| 15.56                     | 401.68                | 440.47    | 502.05    | 440.70    | 15.56           | 0.0390        | 0.03  | 0.02  | 0.03  |
| 16.58                     | 398.24                | 442.16    | 503.37    | 441.80    | 16.58           | 0.0301        | 0.03  | 0.03  | 0.04  |
| 17.58                     | 401.74                | 450.24    | 504.95    | 442.29    | 17.58           | 0.0392        | 0.05  | 0.03  | 0.04  |
| 18.58                     | 403.49                | 446.00    | 505.26    | 446.97    | 18.58           | 0.0437        | 0.04  | 0.03  | 0.05  |
| 19.58                     | 405.15                | 445.70    | 508.58    | 449.80    | 19.58           | 0.0480        | 0.04  | 0.04  | 0.06  |
| 20.58                     | 401.65                | 447.03    | 507.08    | 450.39    | 20.58           | 0.0389        | 0.04  | 0.03  | 0.06  |
| 21.58                     | 399.22                | 442.83    | 498.96    | 437.79    | 21.58           | 0.0326        | 0.03  | 0.02  | 0.03  |
| 22.58                     | 407.95                | 446.63    | 505.30    | 444.61    | 22.58           | 0.0552        | 0.04  | 0.03  | 0.04  |
| 23.58                     | 409.78                | 455.37    | 522.06    | 453.85    | 23.58           | 0.0600        | 0.06  | 0.07  | 0.06  |
| 24.58                     | 413.48                | 467.48    | 520.53    | 463.80    | 24.58           | 0.0695        | 0.09  | 0.06  | 0.09  |
| 25.58                     | 433.78                | 483.59    | 547.63    | 479.34    | 25.58           | 0.1220        | 0.13  | 0.12  | 0.12  |
| 26.58                     | 445.53                | 500.15    | 577.38    | 501.53    | 26.58           | 0.1524        | 0.17  | 0.18  | 0.18  |
| 27.58                     | 482.03                | 554.79    | 622.28    | 551.18    | 27.58           | 0.2468        | 0.29  | 0.27  | 0.29  |
| 28.56                     | 504.81                | 580.48    | 668.01    | 573.04    | 28.56           | 0.3058        | 0.35  | 0.36  | 0.34  |
| 29.61                     | 545.66                | 639.22    | 739.57    | 633.48    | 29.61           | 0.4114        | 0.49  | 0.51  | 0.49  |
| 30.56                     | 589.90                | 705.26    | 813.76    | 691.44    | 30.56           | 0.5259        | 0.65  | 0.66  | 0.62  |
| 31.63                     | 626.42                | 753.29    | 881.08    | 741.11    | 31.63           | 0.6203        | 0.76  | 0.80  | 0.74  |
| 32.63                     | 664.30                | 824.76    | 956.58    | 804.91    | 32.63           | 0.7183        | 0.92  | 0.95  | 0.89  |
| 33.63                     | 695.29                | 864.82    | 1008.12   | 850.14    | 33.63           | 0.7985        | 1.02  | 1.06  | 0.99  |
| 34.63                     | 735.38                | 923.73    | 1089.35   | 912.73    | 34.63           | 0.9022        | 1.16  | 1.22  | 1.14  |
| 35.63                     | 761.64                | 968.13    | 1131.88   | 947.18    | 35.63           | 0.9701        | 1.26  | 1.31  | 1.22  |
| 36.63                     | 808.92                | 1036.68   | 1222.01   | 1020.44   | 36.63           | 1.0924        | 1.42  | 1.49  | 1.39  |
| 37.65                     | 837.30                | 1082.54   | 1291.45   | 1060.43   | 37.65           | 1.1658        | 1.53  | 1.64  | 1.49  |
| 38.65                     | 879.41                | 1132.54   | 1355.97   | 1132.85   | 38.65           | 1.2747        | 1.64  | 1.77  | 1.66  |
| 39.65                     | 899.87                | 1166.53   | 1389.23   | 1165.53   | 39.65           | 1.3277        | 1.72  | 1.83  | 1.73  |
| <b>Parameter</b>          |                       |           |           |           |                 |               |       |       |       |
| <b>a</b>                  | 576.40                | 818.60    | 1004.00   | 844.80    |                 |               |       |       |       |
| <b>b</b>                  | 3.38                  | 3.18      | 3.13      | 3.35      |                 |               |       |       |       |
| <b>x0</b>                 | 33.07                 | 33.12     | 33.32     | 33.58     |                 |               |       |       |       |
| <b>y0</b>                 | 386.60                | 428.60    | 490.10    | 426.19    |                 |               |       |       |       |
| <b>R</b>                  | 1.00                  | 1.00      | 1.00      | 1.00      |                 |               |       |       |       |
| <b>CP<sub>(SDM)</sub></b> | 28.62                 | 28.93     | 29.20     | 29.17     |                 |               |       |       |       |

| C7           |                             |                             | C8           |                             |                             | C9           |                             |                             |
|--------------|-----------------------------|-----------------------------|--------------|-----------------------------|-----------------------------|--------------|-----------------------------|-----------------------------|
| Well / Cycle | FAM Normalized Fluorescence | VIC Normalized Fluorescence | Well / Cycle | FAM Normalized Fluorescence | VIC Normalized Fluorescence | Well / Cycle | FAM Normalized Fluorescence | VIC Normalized Fluorescence |
| 0.56         | -0.0211554                  | -0.039595434                | 0.56         | -0.0274170                  | -0.017364091                | 0.56         | 0.001971578                 | -0.009169531                |
| 1.56         | -0.01426213                 | -0.016533608                | 1.56         | -0.0180162                  | -0.035245161                | 1.56         | -0.002441815                | -0.019701152                |
| 2.56         | -0.02943658                 | -0.027685894                | 2.56         | -0.0193323                  | -0.013174384                | 2.56         | -0.001548628                | -0.019155068                |
| 3.56         | -0.01652905                 | -0.003522608                | 3.56         | -0.0070407                  | -0.024920526                | 3.56         | -0.00315111                 | -0.017204767                |
| 4.56         | -0.01250412                 | -0.013711116                | 4.56         | -0.0063592                  | -0.018037437                | 4.56         | 0.003258818                 | -0.007063207                |
| 5.56         | -0.00514821                 | 0.002604265                 | 5.56         | -0.0135508                  | -0.006066845                | 5.56         | 0.001157202                 | -0.003708691                |
| 6.56         | 0.003826922                 | -0.015982878                | 6.56         | 0.0031591                   | 0.010841615                 | 6.56         | 0.0088281                   | 3.58855E-05                 |
| 7.56         | -0.00313574                 | -0.005519005                | 7.56         | -0.0001781                  | -0.000156366                | 7.56         | 0.000316556                 | 0.011191602                 |
| 8.56         | 0.022424877                 | 0.015546424                 | 8.56         | 0.0142051                   | 0.023335919                 | 8.56         | 0.014949056                 | -0.003786703                |
| 9.56         | 0.005746861                 | 0.003912249                 | 9.56         | 0.0101157                   | -0.007263904                | 9.56         | 0.010614473                 | -0.008311399                |
| 10.56        | 0.023535203                 | -0.00524364                 | 10.56        | 0.0186705                   | 0.020418088                 | 10.56        | 0.021700496                 | 0.024141595                 |
| 11.56        | 0.01870066                  | 0.013481186                 | 11.56        | 0.0176599                   | 0.029321215                 | 11.56        | 0.007094267                 | 0.015950334                 |
| 12.56        | 0.02143021                  | 0.019952265                 | 12.56        | 0.0360854                   | 0.011889042                 | 12.56        | 0.013609275                 | 0.020475031                 |
| 13.56        | 0.02751387                  | 0.010107964                 | 13.56        | 0.0219842                   | 0.031640517                 | 13.56        | 0.01423976                  | 0.027184063                 |
| 14.56        | 0.038779049                 | 0.028626266                 | 14.56        | 0.0291758                   | 0.014732057                 | 14.56        | 0.024327516                 | 0.023829547                 |
| 15.56        | 0.028392878                 | 0.014444964                 | 15.56        | 0.0248280                   | 0.016901727                 | 15.56        | 0.006463782                 | 0.025857859                 |
| 16.58        | 0.020759389                 | 0.034890821                 | 16.58        | 0.0292934                   | 0.023560368                 | 16.58        | 0.017418454                 | 0.028510267                 |
| 17.58        | 0.030335948                 | 0.049347488                 | 17.58        | 0.0367435                   | 0.026927097                 | 17.58        | 0.027427399                 | 0.017120515                 |
| 18.58        | 0.038085095                 | 0.043977869                 | 18.58        | 0.0311970                   | 0.041965152                 | 18.58        | 0.026324051                 | 0.020943103                 |
| 19.58        | 0.038524599                 | 0.041224218                 | 19.58        | 0.0372840                   | 0.028498237                 | 19.58        | 0.016735429                 | 0.023049427                 |
| 20.58        | 0.033181157                 | 0.060362091                 | 20.58        | 0.0223603                   | 0.024009265                 | 20.58        | 0.0222259                   | 0.022269307                 |
| 21.58        | 0.024298552                 | 0.046938044                 | 21.58        | 0.0312675                   | 0.047651183                 | 21.58        | 0.005150272                 | 0.032566891                 |
| 22.58        | 0.032302149                 | 0.070206393                 | 22.58        | 0.0327952                   | 0.051017912                 | 22.58        | 0.019414989                 | 0.040056044                 |
| 23.58        | 0.070585253                 | 0.073786139                 | 23.58        | 0.0510562                   | 0.072714608                 | 23.58        | 0.039958283                 | 0.066502113                 |
| 24.58        | 0.063113686                 | 0.101598012                 | 24.58        | 0.0644053                   | 0.087603031                 | 24.58        | 0.050834144                 | 0.071962954                 |
| 25.58        | 0.128807954                 | 0.112887981                 | 25.58        | 0.1105162                   | 0.101069946                 | 25.58        | 0.075974723                 | 0.093728303                 |
| 26.58        | 0.166906004                 | 0.135812124                 | 26.58        | 0.1427140                   | 0.120522157                 | 26.58        | 0.131509919                 | 0.124543045                 |
| 27.58        | 0.267529266                 | 0.183450283                 | 27.58        | 0.2548890                   | 0.171247538                 | 27.58        | 0.230128238                 | 0.142719842                 |
| 28.56        | 0.339191535                 | 0.263168475                 | 28.56        | 0.3338087                   | 0.244043696                 | 28.56        | 0.307021104                 | 0.215271006                 |
| 29.61        | 0.477334552                 | 0.334350348                 | 29.61        | 0.4596384                   | 0.347065597                 | 29.61        | 0.420613435                 | 0.289226386                 |
| 30.56        | 0.63389047                  | 0.442155778                 | 30.56        | 0.5997573                   | 0.41365201                  | 30.56        | 0.540799586                 | 0.391032052                 |
| 31.63        | 0.750844773                 | 0.534127716                 | 31.63        | 0.7082190                   | 0.521387332                 | 31.63        | 0.64808707                  | 0.471462429                 |
| 32.63        | 0.872147851                 | 0.640143272                 | 32.63        | 0.8564226                   | 0.610942317                 | 32.63        | 0.762309886                 | 0.545963893                 |
| 33.63        | 0.986742712                 | 0.733147829                 | 33.63        | 0.9484564                   | 0.740523968                 | 33.63        | 0.838703618                 | 0.646677391                 |
| 34.63        | 1.13254235                  | 0.838612656                 | 34.63        | 1.0782579                   | 0.844144398                 | 34.63        | 0.965325967                 | 0.727185779                 |
| 35.63        | 1.213249146                 | 0.988893149                 | 35.63        | 1.1365428                   | 0.934148281                 | 35.63        | 1.034442855                 | 0.835232406                 |
| 36.63        | 1.362310366                 | 1.110122627                 | 36.63        | 1.3044411                   | 1.06709666                  | 36.63        | 1.162904118                 | 0.934931747                 |
| 37.65        | 1.476974622                 | 1.199340914                 | 37.65        | 1.3747120                   | 1.166153303                 | 37.65        | 1.24998982                  | 1.029014225                 |
| 38.65        | 1.598162041                 | 1.328418296                 | 38.65        | 1.5043020                   | 1.307780361                 | 38.65        | 1.356121416                 | 1.159840356                 |
| 39.65        | 1.666285146                 | 1.450473869                 | 39.65        | 1.6008717                   | 1.416189028                 | 39.65        | 1.420194426                 | 1.245497537                 |

| parameter | value   |
|-----------|---------|
| y0        | -0.0163 |
| a         | 1.4236  |

| parameter | value   |
|-----------|---------|
| y0        | -0.0186 |
| a         | 1.4288  |

| parameter | value   |
|-----------|---------|
| y0        | -0.0215 |
| a         | 1.4461  |

| AVERAGE   |         |
|-----------|---------|
| parameter | value   |
| y0        | -0.0141 |
| a         | 1.3951  |

| Well /<br>Cycle     | Raw fluorescence data |        |        |        | Well /<br>Cycle | D2 Normalized | D3 Normalized | D4 Normalized | D5 Normalized |
|---------------------|-----------------------|--------|--------|--------|-----------------|---------------|---------------|---------------|---------------|
|                     | D2                    | D3     | D4     | D5     |                 | Fluorescence  | Fluorescence  | Fluorescence  | Fluorescence  |
| 0.56                | 329.07                | 377.95 | 325.12 | 391.09 | 0.56            | -0.0168810    | -0.0170484    | -0.0219658    | -0.0272758    |
| 1.56                | 331.3                 | 381.23 | 326.07 | 396.23 | 1.56            | -0.0102187    | -0.0085180    | -0.0191079    | -0.0144915    |
| 2.56                | 326.4                 | 376.62 | 324.65 | 388.15 | 2.56            | -0.0248578    | -0.0205074    | -0.0233796    | -0.0345882    |
| 3.56                | 334.42                | 382.3  | 330.17 | 397.32 | 3.56            | -0.0008975    | -0.0057352    | -0.0067742    | -0.0117804    |
| 4.56                | 329.88                | 376.87 | 327.75 | 396.23 | 4.56            | -0.0144610    | -0.0198572    | -0.0140541    | -0.0144915    |
| 5.56                | 332.01                | 380.64 | 325.23 | 397    | 5.56            | -0.0080975    | -0.0100524    | -0.0216349    | -0.0125763    |
| 6.56                | 337.51                | 386.83 | 334.08 | 403.6  | 6.56            | 0.0083341     | 0.0060462     | 0.0049879     | 0.0038393     |
| 7.56                | 336.35                | 382.11 | 330.91 | 400.16 | 7.56            | 0.0048685     | -0.0062293    | -0.0045481    | -0.0047168    |
| 8.56                | 337.49                | 390.17 | 335.19 | 406.62 | 8.56            | 0.0082744     | 0.0147327     | 0.0083271     | 0.0113506     |
| 9.56                | 337.01                | 386.08 | 332.41 | 403.81 | 9.56            | 0.0068403     | 0.0040957     | -0.0000358    | 0.0043616     |
| 10.56               | 339.83                | 388.39 | 337.91 | 411.47 | 10.56           | 0.0152653     | 0.0101034     | 0.0165094     | 0.0234136     |
| 11.56               | 333.97                | 386.91 | 334.46 | 402.46 | 11.56           | -0.0022419    | 0.0062543     | 0.0061311     | 0.0010038     |
| 12.56               | 343.66                | 393.05 | 342    | 412.63 | 12.56           | 0.0267077     | 0.0222228     | 0.0288131     | 0.0262988     |
| 13.56               | 341.84                | 395.27 | 344.34 | 409.69 | 13.56           | 0.0212703     | 0.0279965     | 0.0358523     | 0.0189864     |
| 14.56               | 343.51                | 395.45 | 342.04 | 413.29 | 14.56           | 0.0262595     | 0.0284646     | 0.0289334     | 0.0279404     |
| 15.56               | 344.38                | 393.13 | 343.31 | 416.03 | 15.56           | 0.0288587     | 0.0224309     | 0.0327539     | 0.0347553     |
| 16.58               | 342.37                | 395.76 | 344.34 | 417.57 | 16.58           | 0.0228537     | 0.0292709     | 0.0358523     | 0.0385856     |
| 17.58               | 345.79                | 393.44 | 351.64 | 416.09 | 17.58           | 0.0330712     | 0.0232371     | 0.0578124     | 0.0349046     |
| 18.58               | 343.91                | 397.35 | 351.84 | 415.7  | 18.58           | 0.0274546     | 0.0334061     | 0.0584140     | 0.0339345     |
| 19.58               | 347.2                 | 398.65 | 352.03 | 417.5  | 19.58           | 0.0372837     | 0.0367870     | 0.0589856     | 0.0384115     |
| 20.58               | 343.91                | 399.76 | 363.95 | 415.01 | 20.58           | 0.0274546     | 0.0396738     | 0.0948436     | 0.0322184     |
| 21.58               | 341.53                | 389.63 | 343.78 | 414.47 | 21.58           | 0.0203441     | 0.0133283     | 0.0341677     | 0.0308753     |
| 22.58               | 344.94                | 394.77 | 353.79 | 421.96 | 22.58           | 0.0305318     | 0.0266961     | 0.0642801     | 0.0495045     |
| 23.58               | 353.48                | 407.85 | 367.13 | 424.38 | 23.58           | 0.0560456     | 0.0607139     | 0.1044098     | 0.0555236     |
| 24.58               | 355.38                | 408.63 | 370.16 | 426.23 | 24.58           | 0.0617220     | 0.0627425     | 0.1135247     | 0.0601249     |
| 25.58               | 367.68                | 423.38 | 385.39 | 442.91 | 25.58           | 0.0984691     | 0.1011034     | 0.1593400     | 0.1016116     |
| 26.58               | 380.74                | 434.44 | 397.8  | 456.23 | 26.58           | 0.1374867     | 0.1298677     | 0.1966721     | 0.1347413     |
| 27.58               | 409.2                 | 472.96 | 429.07 | 494.66 | 27.58           | 0.2225129     | 0.2300484     | 0.2907393     | 0.2303249     |
| 28.56               | 429.79                | 489.31 | 439.04 | 509.64 | 28.56           | 0.2840269     | 0.2725706     | 0.3207313     | 0.2675834     |
| 29.61               | 465.57                | 537.53 | 474.53 | 553.25 | 29.61           | 0.3909221     | 0.3979785     | 0.4274932     | 0.3760507     |
| 30.56               | 504.15                | 587.39 | 516.49 | 602.73 | 30.56           | 0.5061825     | 0.5276516     | 0.5537183     | 0.4991180     |
| 31.63               | 535.18                | 622.55 | 543.56 | 644.47 | 31.63           | 0.5988867     | 0.6190938     | 0.6351510     | 0.6029343     |
| 32.63               | 576.31                | 677.25 | 584.73 | 697.26 | 32.63           | 0.7217654     | 0.7613546     | 0.7589996     | 0.7342343     |
| 33.63               | 595.56                | 707.53 | 611.17 | 733.51 | 33.63           | 0.7792761     | 0.8401052     | 0.8385371     | 0.8243958     |
| 34.63               | 639.21                | 759.2  | 653.63 | 784.97 | 34.63           | 0.9096834     | 0.9744857     | 0.9662664     | 0.9523878     |
| 35.63               | 669.3                 | 790.6  | 676.59 | 816.64 | 35.63           | 0.9995794     | 1.0561490     | 1.0353352     | 1.0311578     |
| 36.63               | 712.48                | 848.33 | 728.64 | 869.03 | 36.63           | 1.1285825     | 1.2062901     | 1.1919133     | 1.1614629     |
| 37.65               | 742.33                | 889.76 | 759.41 | 922.55 | 37.65           | 1.2177615     | 1.3140389     | 1.2844764     | 1.2945786     |
| 38.65               | 779.47                | 932.7  | 807.69 | 967.09 | 38.65           | 1.3287197     | 1.4257149     | 1.4297136     | 1.4053590     |
| 39.65               | 797.24                | 953.7  | 831.12 | 996.64 | 39.65           | 1.3818088     | 1.4803306     | 1.5001963     | 1.4788562     |
| Parameter           |                       |        |        |        | Parameter Value |               |               |               |               |
| a                   | 525.59                | 646.18 | 633.02 | 691.05 | a               | 1.570200      | 1.680600      | 1.904300      | 1.718800      |
| b                   | 3.27                  | 3.19   | 3.97   | 3.32   | b               | 3.267400      | 3.186500      | 3.969500      | 3.324800      |
| x0                  | 33.45                 | 33.52  | 34.55  | 33.90  | x0              | 33.448100     | 33.519700     | 34.545300     | 33.899100     |
| y0                  | 334.72                | 384.51 | 332.42 | 402.06 | y0              | 0.000000      | 0.000000      | 0.000000      | 0.000000      |
| R                   | 1.00                  | 1.00   | 1.00   | 1.00   | R               | 0.998805      | 0.998843      | 0.998805      | 0.998792      |
| CP <sub>(SDM)</sub> | 29.14                 | 29.32  | 29.32  | 29.52  |                 |               |               |               |               |

| Well /<br>Cycle     | Raw fluorescence data |        |        |        | Well /<br>Cycle | D2 Normalized | D3 Normalized | D4 Normalized | D5 Normalized |
|---------------------|-----------------------|--------|--------|--------|-----------------|---------------|---------------|---------------|---------------|
|                     | D2                    | D3     | D4     | D5     |                 | Fluorescence  | Fluorescence  | Fluorescence  | Fluorescence  |
| 0.56                | 108.16                | 119.08 | 131.5  | 175.96 | 0.56            | -0.0252431    | -0.0134054    | -0.0176641    | -0.0099372    |
| 1.56                | 108.51                | 118.72 | 131.4  | 173.03 | 1.56            | -0.0220888    | -0.0163880    | -0.0184111    | -0.0264232    |
| 2.56                | 109.24                | 118.45 | 130.98 | 174.09 | 2.56            | -0.0155100    | -0.0186250    | -0.0215486    | -0.0204590    |
| 3.56                | 110.11                | 119.08 | 131.71 | 175.8  | 3.56            | -0.0076694    | -0.0134054    | -0.0160954    | -0.0108375    |
| 4.56                | 111.88                | 120.36 | 131.56 | 176.38 | 4.56            | 0.0082822     | -0.0028004    | -0.0172159    | -0.0075740    |
| 5.56                | 110.34                | 119.94 | 134.34 | 174.6  | 5.56            | -0.0055966    | -0.0062801    | 0.0035513     | -0.0175894    |
| 6.56                | 111.62                | 120.83 | 133.31 | 178.05 | 6.56            | 0.0059390     | 0.0010936     | -0.0041430    | 0.0018225     |
| 7.56                | 111.36                | 120.17 | 134.07 | 179.93 | 7.56            | 0.0035959     | -0.0043746    | 0.0015344     | 0.0124005     |
| 8.56                | 111.06                | 121.78 | 134.01 | 179.8  | 8.56            | 0.0008922     | 0.0089645     | 0.0010862     | 0.0116691     |
| 9.56                | 111.81                | 122.12 | 134.67 | 177.03 | 9.56            | 0.0076513     | 0.0117815     | 0.0060165     | -0.0039167    |
| 10.56               | 111.84                | 120.92 | 136.08 | 181.23 | 10.56           | 0.0079217     | 0.0018393     | 0.0165496     | 0.0197152     |
| 11.56               | 112.55                | 124.03 | 135.54 | 179.91 | 11.56           | 0.0143203     | 0.0276061     | 0.0125156     | 0.0122880     |
| 12.56               | 113.04                | 121.97 | 135.96 | 181.98 | 12.56           | 0.0187363     | 0.0105387     | 0.0156531     | 0.0239351     |
| 13.56               | 113.65                | 124.51 | 136.84 | 182.36 | 13.56           | 0.0242337     | 0.0315830     | 0.0222269     | 0.0260733     |
| 14.56               | 113.64                | 123.35 | 136.97 | 183.07 | 14.56           | 0.0241436     | 0.0219722     | 0.0231981     | 0.0300682     |
| 15.56               | 113.2                 | 122.64 | 137.51 | 184.67 | 15.56           | 0.0201783     | 0.0160897     | 0.0272320     | 0.0390708     |
| 16.58               | 113.59                | 123.7  | 138.4  | 181.07 | 16.58           | 0.0236930     | 0.0248720     | 0.0338805     | 0.0188149     |
| 17.58               | 113.76                | 123.52 | 138.91 | 183.66 | 17.58           | 0.0252251     | 0.0233807     | 0.0376903     | 0.0333879     |
| 18.58               | 113.87                | 125.53 | 138.77 | 187.31 | 18.58           | 0.0262164     | 0.0400338     | 0.0366445     | 0.0539251     |
| 19.58               | 114.8                 | 125.37 | 138.97 | 188.96 | 19.58           | 0.0345977     | 0.0387082     | 0.0381385     | 0.0632091     |
| 20.58               | 113.75                | 124.25 | 140.07 | 185.32 | 20.58           | 0.0251350     | 0.0294288     | 0.0463558     | 0.0427281     |
| 21.58               | 115.51                | 126.18 | 142.92 | 185.72 | 21.58           | 0.0409964     | 0.0454191     | 0.0676460     | 0.0449788     |
| 22.58               | 117.13                | 126.77 | 142.83 | 190.86 | 22.58           | 0.0555961     | 0.0503074     | 0.0669736     | 0.0738997     |
| 23.58               | 118.3                 | 127.73 | 142.66 | 194.6  | 23.58           | 0.0661404     | 0.0582611     | 0.0657037     | 0.0949433     |
| 24.58               | 120.63                | 132.65 | 144.61 | 195.37 | 24.58           | 0.0871387     | 0.0990240     | 0.0802707     | 0.0992758     |
| 25.58               | 122.27                | 133.58 | 149.44 | 205.36 | 25.58           | 0.1019187     | 0.1067292     | 0.1163519     | 0.1554859     |
| 26.58               | 127.48                | 139.39 | 158.81 | 215.2  | 26.58           | 0.1488721     | 0.1548659     | 0.1863480     | 0.2108520     |
| 27.58               | 133.32                | 146.58 | 166.13 | 229.16 | 27.58           | 0.2015032     | 0.2144360     | 0.2410301     | 0.2893998     |
| 28.56               | 144.79                | 158.3  | 179.69 | 251.09 | 28.56           | 0.3048729     | 0.3115379     | 0.3423265     | 0.4127919     |
| 29.61               | 157.19                | 172.98 | 197.48 | 279.48 | 29.61           | 0.4166239     | 0.4331638     | 0.4752220     | 0.5725321     |
| 30.56               | 170.56                | 187.05 | 213.37 | 312.15 | 30.56           | 0.5371166     | 0.5497357     | 0.5939240     | 0.7563543     |
| 31.63               | 182.88                | 205.29 | 236.89 | 346.23 | 31.63           | 0.6481466     | 0.7008567     | 0.7696239     | 0.9481100     |
| 32.63               | 196.53                | 220.17 | 252.6  | 382.72 | 32.63           | 0.7711628     | 0.8241396     | 0.8869813     | 1.1534260     |
| 33.63               | 212                   | 236.65 | 275.23 | 421.43 | 33.63           | 0.9105812     | 0.9606787     | 1.0560327     | 1.3712330     |
| 34.63               | 225.87                | 256.41 | 291.02 | 449.09 | 34.63           | 1.0355801     | 1.1243931     | 1.1739877     | 1.5268658     |
| 35.63               | 241.22                | 273.2  | 314.94 | 495.57 | 35.63           | 1.1739170     | 1.2635006     | 1.3526758     | 1.7883918     |
| 36.63               | 252.01                | 289.78 | 330.17 | 533.2  | 36.63           | 1.2711583     | 1.4008683     | 1.4664474     | 2.0001221     |
| 37.65               | 265.22                | 306.62 | 350.92 | 557.16 | 37.65           | 1.3902092     | 1.5403901     | 1.6214548     | 2.1349363     |
| 38.65               | 280.75                | 324.72 | 369.72 | 598.54 | 38.65           | 1.5301683     | 1.6903511     | 1.7618952     | 2.3677665     |
| 39.65               | 294.5                 | 342.05 | 389.42 | 642.62 | 39.65           | 1.6540857     | 1.8339326     | 1.9090589     | 2.6157886     |
| <b>Parameter</b>    |                       |        |        |        |                 |               |               |               |               |
| a                   | 210.56                | 260.23 | 295.17 | 543.15 |                 |               |               |               |               |
| b                   | 3.30                  | 3.32   | 3.32   | 3.28   |                 |               |               |               |               |
| x0                  | 33.98                 | 34.36  | 34.05  | 34.47  |                 |               |               |               |               |
| y0                  | 110.96                | 120.70 | 133.86 | 177.73 |                 |               |               |               |               |
| R                   | 1.00                  | 1.00   | 1.00   | 1.00   |                 |               |               |               |               |
| CP <sub>(SDM)</sub> | 29.64                 | 29.98  | 29.68  | 30.15  |                 |               |               |               |               |

| D2           |                             |                             | D3           |                             |                             | D4           |                             |
|--------------|-----------------------------|-----------------------------|--------------|-----------------------------|-----------------------------|--------------|-----------------------------|
| Well / Cycle | FAM Normalized Fluorescence | VIC Normalized Fluorescence | Well / Cycle | FAM Normalized Fluorescence | VIC Normalized Fluorescence | Well / Cycle | FAM Normalized Fluorescence |
| 0.56         | -0.0168810                  | -0.025243103                | 0.56         | -0.017048404                | -0.013405359                | 0.56         | -0.0219658                  |
| 1.56         | -0.0102187                  | -0.022088842                | 1.56         | -0.00851796                 | -0.01638801                 | 1.56         | -0.0191079                  |
| 2.56         | -0.0248578                  | -0.015509954                | 2.56         | -0.020507395                | -0.018624998                | 2.56         | -0.0233796                  |
| 3.56         | -0.0008975                  | -0.007669361                | 3.56         | -0.005735163                | -0.013405359                | 3.56         | -0.0067742                  |
| 4.56         | -0.0144610                  | 0.008282189                 | 4.56         | -0.019857209                | -0.002800378                | 4.56         | -0.0140541                  |
| 5.56         | -0.0080975                  | -0.005596561                | 5.56         | -0.0100524                  | -0.006280137                | 5.56         | -0.0216349                  |
| 6.56         | 0.0083341                   | 0.005939024                 | 6.56         | 0.006046212                 | 0.001093639                 | 6.56         | 0.0049879                   |
| 7.56         | 0.0048685                   | 0.003595858                 | 7.56         | -0.006229305                | -0.004374555                | 7.56         | -0.0045481                  |
| 8.56         | 0.0082744                   | 0.000892205                 | 8.56         | 0.014732701                 | 0.008964523                 | 8.56         | 0.0083271                   |
| 9.56         | 0.0068403                   | 0.007651337                 | 9.56         | 0.004095653                 | 0.011781471                 | 9.56         | -0.0000358                  |
| 10.56        | 0.0152653                   | 0.007921702                 | 10.6         | 0.010103374                 | 0.001839301                 | 10.56        | 0.0165094                   |
| 11.56        | -0.0022419                  | 0.014320347                 | 11.6         | 0.006254272                 | 0.027606091                 | 11.56        | 0.0061311                   |
| 12.56        | 0.0267077                   | 0.018736313                 | 12.6         | 0.022222846                 | 0.0105387                   | 12.56        | 0.0288131                   |
| 13.56        | 0.0212703                   | 0.02423374                  | 13.6         | 0.0279965                   | 0.031582959                 | 13.56        | 0.0358523                   |
| 14.56        | 0.0262595                   | 0.024143618                 | 14.6         | 0.028464635                 | 0.021972195                 | 14.56        | 0.0289334                   |
| 15.56        | 0.0288587                   | 0.020178261                 | 15.6         | 0.022430906                 | 0.016089745                 | 15.56        | 0.0327539                   |
| 16.58        | 0.0228537                   | 0.023693009                 | 16.6         | 0.029270866                 | 0.024871995                 | 16.58        | 0.0358523                   |
| 17.58        | 0.0330712                   | 0.025225079                 | 17.6         | 0.023237137                 | 0.023380669                 | 17.58        | 0.0578124                   |
| 18.58        | 0.0274546                   | 0.026216418                 | 18.6         | 0.03340605                  | 0.040033803                 | 18.58        | 0.0584140                   |
| 19.58        | 0.0372837                   | 0.034597742                 | 19.6         | 0.036787019                 | 0.038708181                 | 19.58        | 0.0589856                   |
| 20.58        | 0.0274546                   | 0.025134957                 | 20.6         | 0.039673846                 | 0.029428822                 | 20.58        | 0.0948436                   |
| 21.58        | 0.0203441                   | 0.040996386                 | 21.6         | 0.013328298                 | 0.045419145                 | 21.58        | 0.0341677                   |
| 22.58        | 0.0305318                   | 0.05559611                  | 22.6         | 0.026696128                 | 0.050307379                 | 22.58        | 0.0642801                   |
| 23.58        | 0.0560456                   | 0.066140356                 | 23.6         | 0.060713873                 | 0.058261115                 | 23.58        | 0.1044098                   |
| 24.58        | 0.0617220                   | 0.087138724                 | 24.6         | 0.062742454                 | 0.09902401                  | 24.58        | 0.1135247                   |
| 25.58        | 0.0984691                   | 0.101918692                 | 25.6         | 0.101103444                 | 0.106729192                 | 25.58        | 0.1593400                   |
| 26.58        | 0.1374867                   | 0.148872126                 | 26.6         | 0.129867684                 | 0.154865864                 | 26.58        | 0.1966721                   |
| 27.58        | 0.2225129                   | 0.201503231                 | 27.6         | 0.230048384                 | 0.21443603                  | 27.58        | 0.2907393                   |
| 28.56        | 0.2840269                   | 0.304872883                 | 28.6         | 0.272570566                 | 0.311537888                 | 28.56        | 0.3207313                   |
| 29.61        | 0.3909221                   | 0.416623859                 | 29.6         | 0.397978493                 | 0.433163764                 | 29.61        | 0.4274932                   |
| 30.56        | 0.5061825                   | 0.537116645                 | 30.6         | 0.527651642                 | 0.549735704                 | 30.56        | 0.5537183                   |
| 31.63        | 0.5988867                   | 0.648146646                 | 31.6         | 0.619093838                 | 0.700856684                 | 31.63        | 0.6351510                   |
| 32.63        | 0.7217654                   | 0.771162841                 | 32.6         | 0.761354593                 | 0.824139588                 | 32.63        | 0.7589996                   |
| 33.63        | 0.7792761                   | 0.910581195                 | 33.6         | 0.840105153                 | 0.960678719                 | 33.63        | 0.8385371                   |
| 34.63        | 0.9096834                   | 1.035580069                 | 34.6         | 0.974485651                 | 1.124393113                 | 34.63        | 0.9662664                   |
| 35.63        | 0.9995794                   | 1.173916962                 | 35.6         | 1.056149046                 | 1.263500638                 | 35.63        | 1.0353352                   |
| 36.63        | 1.1285825                   | 1.271158335                 | 36.6         | 1.206290058                 | 1.400868283                 | 36.63        | 1.1919133                   |
| 37.65        | 1.2177615                   | 1.390209173                 | 37.7         | 1.314038926                 | 1.540390064                 | 37.65        | 1.2844764                   |
| 38.65        | 1.3287197                   | 1.530168257                 | 38.7         | 1.425714919                 | 1.690351124                 | 38.65        | 1.4297136                   |
| 39.65        | 1.3818088                   | 1.65408567                  | 39.7         | 1.480330565                 | 1.833932625                 | 39.65        | 1.5001963                   |

| Experiment derived linear regression |           |
|--------------------------------------|-----------|
| parameter                            | value     |
| y0                                   | 0.0115    |
| a                                    | 0.9163    |
| R                                    | 0.9986361 |

| Experiment derived linear regression |            |
|--------------------------------------|------------|
| parameter                            | value      |
| y0                                   | 0.006      |
| a                                    | 0.9079     |
| R                                    | 0.99685065 |

| Experiment derived linear regression |            |
|--------------------------------------|------------|
| parameter                            | value      |
| y0                                   | 0.0735     |
| a                                    | 0.7627     |
| R                                    | 0.99502288 |

D5

| VIC Normalized Fluorescence | Well / Cycle | FAM Normalized Fluorescence | VIC Normalized Fluorescence |
|-----------------------------|--------------|-----------------------------|-----------------------------|
| -0.017664117                | 0.56         | -0.027275775                | -0.009937201                |
| -0.018411141                | 1.56         | -0.014491499                | -0.026423243                |
| -0.021548639                | 2.56         | -0.034588182                | -0.02045901                 |
| -0.016095368                | 3.56         | -0.011780437                | -0.010837463                |
| -0.017215903                | 4.56         | -0.014491499                | -0.007574014                |
| 0.00355135                  | 5.56         | -0.012576345                | -0.017589426                |
| -0.004142992                | 6.56         | 0.003839262                 | 0.001822467                 |
| 0.001534386                 | 7.56         | -0.004716751                | 0.012400542                 |
| 0.001086172                 | 8.56         | 0.011350646                 | 0.01166908                  |
| 0.006016527                 | 9.56         | 0.004361577                 | -0.003916701                |
| 0.016549558                 | 10.56        | 0.023413631                 | 0.019715168                 |
| 0.012515631                 | 11.56        | 0.001003839                 | 0.012288009                 |
| 0.01565313                  | 12.56        | 0.026298798                 | 0.023935145                 |
| 0.022226937                 | 13.56        | 0.018986391                 | 0.026073267                 |
| 0.023198067                 | 14.56        | 0.027940359                 | 0.030068178                 |
| 0.027231994                 | 15.56        | 0.034755323                 | 0.039070795                 |
| 0.033880503                 | 16.58        | 0.038585631                 | 0.018814907                 |
| 0.037690323                 | 17.58        | 0.034904556                 | 0.033387893                 |
| 0.03664449                  | 18.58        | 0.033934543                 | 0.053925113                 |
| 0.038138537                 | 19.58        | 0.038411526                 | 0.063209062                 |
| 0.046355795                 | 20.58        | 0.032218365                 | 0.042728108                 |
| 0.067645965                 | 21.58        | 0.03087527                  | 0.044978762                 |
| 0.066973644                 | 22.58        | 0.049504497                 | 0.073899669                 |
| 0.065703704                 | 23.58        | 0.055523553                 | 0.094943286                 |
| 0.080270662                 | 24.58        | 0.060124898                 | 0.099275796                 |
| 0.116351896                 | 25.58        | 0.101611615                 | 0.155485885                 |
| 0.186347996                 | 26.58        | 0.134741295                 | 0.21085198                  |
| 0.241030116                 | 27.58        | 0.2303249                   | 0.289399812                 |
| 0.3423265                   | 28.56        | 0.267583354                 | 0.412791931                 |
| 0.475221978                 | 29.61        | 0.376050723                 | 0.572532115                 |
| 0.59392401                  | 30.56        | 0.499118034                 | 0.7563543                   |
| 0.769623933                 | 31.63        | 0.602934315                 | 0.948110041                 |
| 0.886981323                 | 32.63        | 0.734234301                 | 1.153425974                 |
| 1.056032738                 | 33.63        | 0.824395781                 | 1.371233038                 |
| 1.173987746                 | 34.63        | 0.952387774                 | 1.526865778                 |
| 1.352675763                 | 35.63        | 1.031157818                 | 1.788391801                 |
| 1.46644744                  | 36.63        | 1.161462919                 | 2.000122098                 |
| 1.621454813                 | 37.65        | 1.294578572                 | 2.134936287                 |
| 1.761895228                 | 38.65        | 1.405359049                 | 2.367766468                 |
| 1.909058855                 | 39.65        | 1.4788562                   | 2.615788565                 |

Percent derived linear regression

| parameter | value      |
|-----------|------------|
| y0        | 0.0172     |
| a         | 0.6244     |
| R         | 0.99776804 |

AVERAGE

Percent derived linear regression

| parameter | value    |
|-----------|----------|
| y0        | 0.02705  |
| a         | 0.802825 |

| Well / Cycle              | Raw fluorescence data |         |          |          | Well / Cycle | D6 Normalized Fluorescence | D7 Normalized Fluorescence | D8 Normalized Fluorescence | D9 Normalized Fluorescence |
|---------------------------|-----------------------|---------|----------|----------|--------------|----------------------------|----------------------------|----------------------------|----------------------------|
| 0.56                      | 379.47                | 458.66  | 445.11   | 412.24   | 0.56         | -0.0199395                 | -0.0080848                 | -0.0090932                 | -0.0226210                 |
| 1.56                      | 380.66                | 459.63  | 442.73   | 407.55   | 1.56         | -0.0168661                 | -0.0059870                 | -0.0143915                 | -0.0337405                 |
| 2.56                      | 373.61                | 454.97  | 442.68   | 410.22   | 2.56         | -0.0350742                 | -0.0160649                 | -0.0145028                 | -0.0274102                 |
| 3.56                      | 382.89                | 458.37  | 448.58   | 415.22   | 3.56         | -0.0111067                 | -0.0087120                 | -0.0013682                 | -0.0155557                 |
| 4.56                      | 381.01                | 454.56  | 445.07   | 416.53   | 4.56         | -0.0159622                 | -0.0169516                 | -0.0091822                 | -0.0124498                 |
| 5.56                      | 382.48                | 458     | 448.13   | 415.7    | 5.56         | -0.0121656                 | -0.0095121                 | -0.0023700                 | -0.0144177                 |
| 6.56                      | 388.31                | 467.73  | 451.87   | 424.26   | 6.56         | 0.0028916                  | 0.0115303                  | 0.0059560                  | 0.0058772                  |
| 7.56                      | 382.58                | 455.97  | 447.53   | 424.46   | 7.56         | -0.0119073                 | -0.0139023                 | -0.0037057                 | 0.0063514                  |
| 8.56                      | 390.55                | 467.24  | 451.76   | 423.9    | 8.56         | 0.0086769                  | 0.0104706                  | 0.0057111                  | 0.0050237                  |
| 9.56                      | 390.1                 | 468.88  | 453.8    | 423.81   | 9.56         | 0.0075146                  | 0.0140173                  | 0.0102526                  | 0.0048103                  |
| 10.56                     | 392.82                | 465.61  | 456.63   | 431.38   | 10.56        | 0.0145396                  | 0.0069455                  | 0.0165527                  | 0.0227580                  |
| 11.56                     | 389.34                | 465.63  | 453.62   | 430.1    | 11.56        | 0.0055518                  | 0.0069888                  | 0.0098519                  | 0.0197233                  |
| 12.56                     | 397.53                | 468.69  | 459.51   | 435.81   | 12.56        | 0.0267042                  | 0.0136064                  | 0.0229642                  | 0.0332611                  |
| 13.56                     | 397.85                | 472.86  | 460.97   | 433.39   | 13.56        | 0.0275306                  | 0.0226246                  | 0.0262145                  | 0.0275235                  |
| 14.56                     | 399.33                | 474.77  | 458.08   | 441.8    | 14.56        | 0.0313531                  | 0.0267553                  | 0.0197807                  | 0.0474628                  |
| 15.56                     | 397.45                | 476.16  | 456.97   | 433.39   | 15.56        | 0.0264976                  | 0.0297613                  | 0.0173096                  | 0.0275235                  |
| 16.58                     | 401.23                | 470.11  | 460.58   | 430.95   | 16.58        | 0.0362602                  | 0.0166774                  | 0.0253463                  | 0.0217385                  |
| 17.58                     | 400.12                | 480.44  | 463.96   | 434.13   | 17.58        | 0.0333934                  | 0.0390174                  | 0.0328708                  | 0.0292780                  |
| 18.58                     | 402.09                | 478.18  | 460.1    | 435.66   | 18.58        | 0.0384813                  | 0.0341299                  | 0.0242777                  | 0.0329055                  |
| 19.58                     | 402.95                | 476.04  | 457.92   | 435.01   | 19.58        | 0.0407025                  | 0.0295018                  | 0.0194245                  | 0.0313644                  |
| 20.58                     | 405.24                | 479.01  | 459.57   | 434.93   | 20.58        | 0.0466169                  | 0.0359249                  | 0.0230978                  | 0.0311747                  |
| 21.58                     | 397.12                | 475.62  | 462.51   | 431.4    | 21.58        | 0.0256453                  | 0.0285935                  | 0.0296428                  | 0.0228054                  |
| 22.58                     | 403.36                | 480.35  | 462.38   | 439.18   | 22.58        | 0.0417614                  | 0.0388228                  | 0.0293534                  | 0.0412510                  |
| 23.58                     | 410.26                | 487.69  | 474.23   | 445.61   | 23.58        | 0.0595821                  | 0.0546966                  | 0.0557340                  | 0.0564959                  |
| 24.58                     | 415.94                | 489.68  | 472.41   | 450.07   | 24.58        | 0.0742518                  | 0.0590002                  | 0.0516823                  | 0.0670701                  |
| 25.58                     | 427.75                | 513.2   | 491.99   | 466.56   | 25.58        | 0.1047536                  | 0.1098654                  | 0.0952714                  | 0.1061662                  |
| 26.58                     | 441.7                 | 526.36  | 502.56   | 479.65   | 26.58        | 0.1407824                  | 0.1383257                  | 0.1188024                  | 0.1372013                  |
| 27.58                     | 472.34                | 565.4   | 541.01   | 517.57   | 27.58        | 0.2199166                  | 0.2227551                  | 0.2044001                  | 0.2271057                  |
| 28.56                     | 488.57                | 586.66  | 568.58   | 555.61   | 28.56        | 0.2618340                  | 0.2687328                  | 0.2657766                  | 0.3172947                  |
| 29.61                     | 537.75                | 643.48  | 626.24   | 589.72   | 29.61        | 0.3888516                  | 0.3916138                  | 0.3941396                  | 0.3981660                  |
| 30.56                     | 586.92                | 696.21  | 674.22   | 636.29   | 30.56        | 0.5158434                  | 0.5056497                  | 0.5009530                  | 0.5085787                  |
| 31.63                     | 625.62                | 751.74  | 715.19   | 679.56   | 31.63        | 0.6157942                  | 0.6257409                  | 0.5921607                  | 0.6111675                  |
| 32.63                     | 670.61                | 810.42  | 774.39   | 726.42   | 32.63        | 0.7319903                  | 0.7526445                  | 0.7239522                  | 0.7222678                  |
| 33.63                     | 696.9                 | 849.15  | 802.19   | 759.05   | 33.63        | 0.7998897                  | 0.8364034                  | 0.7858407                  | 0.7996302                  |
| 34.63                     | 754.67                | 905.14  | 857.31   | 806.17   | 34.63        | 0.9490927                  | 0.9574895                  | 0.9085492                  | 0.9113469                  |
| 35.63                     | 785.2                 | 951.23  | 892.46   | 834.09   | 35.63        | 1.0279428                  | 1.0571654                  | 0.9868004                  | 0.9775424                  |
| 36.63                     | 836.57                | 1008.95 | 946.31   | 894.71   | 36.63        | 1.1606166                  | 1.1819928                  | 1.1066816                  | 1.1212662                  |
| 37.65                     | 875.97                | 1059.78 | 1002.43  | 924.16   | 37.65        | 1.2623753                  | 1.2919197                  | 1.2316163                  | 1.1910892                  |
| 38.65                     | 926.32                | 1126.5  | 1042.08  | 970.28   | 38.65        | 1.3924147                  | 1.4362109                  | 1.3198854                  | 1.3004350                  |
| 39.65                     | 949.57                | 1157.13 | 1077.13  | 992.52   | 39.65        | 1.4524627                  | 1.5024524                  | 1.3979140                  | 1.3531638                  |
| Parameter                 |                       |         |          |          | Parameter    | Value                      |                            |                            |                            |
| a                         | 651.86                | 800.363 | 704.7422 | 639.4115 | a            | 1.683600                   | 1.730900                   | 1.568900                   | 1.516000                   |
| b                         | 3.341                 | 3.2985  | 3.2178   | 3.273    | b            | 3.341000                   | 3.298500                   | 3.217800                   | 3.273000                   |
| x0                        | 33.7798               | 33.8228 | 33.4847  | 33.1656  | x0           | 33.779800                  | 33.822800                  | 33.484700                  | 33.165600                  |
| y0                        | 387.19                | 462.398 | 449.1946 | 421.7811 | y0           | 0.000000                   | 0.000000                   | 0.000000                   | 0.000000                   |
| R                         | 0.99867               | 0.99888 | 0.998606 | 0.998496 | R            | 0.998672                   | 0.998884                   | 0.998606                   | 0.998496                   |
| <b>CP<sub>(SDM)</sub></b> | 29.38                 | 29.48   | 29.25    | 28.86    |              |                            |                            |                            |                            |

| Well /<br>Cycle     | Raw fluorescence data |        |        |        | Well /<br>Cycle | D6 Normalized | D7 Normalized | D8 Normalized | D9 Normalized |
|---------------------|-----------------------|--------|--------|--------|-----------------|---------------|---------------|---------------|---------------|
|                     | D6                    | D7     | D8     | D9     |                 | Fluorescence  | Fluorescence  | Fluorescence  | Fluorescence  |
| 0.56                | 146.17                | 157.28 | 176.61 | 157.66 | 0.56            | -0.0174218    | -0.0106154    | 0.0233230     | -0.0214941    |
| 1.56                | 145.6                 | 156.77 | 175.77 | 159.17 | 1.56            | -0.0212535    | -0.0138236    | 0.0184559     | -0.0121224    |
| 2.56                | 143.7                 | 154.58 | 177.86 | 161.04 | 2.56            | -0.0340256    | -0.0276000    | 0.0305658     | -0.0005164    |
| 3.56                | 146.21                | 155.46 | 174.39 | 162.17 | 3.56            | -0.0171529    | -0.0220643    | 0.0104598     | 0.0064969     |
| 4.56                | 146.74                | 159.22 | 178.76 | 162.39 | 4.56            | -0.0135902    | 0.0015884     | 0.0357807     | 0.0078623     |
| 5.56                | 146.74                | 158    | 178.69 | 163.4  | 5.56            | -0.0135902    | -0.0060861    | 0.0353751     | 0.0141308     |
| 6.56                | 149.11                | 158.48 | 176.46 | 162.52 | 6.56            | 0.0023413     | -0.0030667    | 0.0224539     | 0.0086691     |
| 7.56                | 147.85                | 157.83 | 174.38 | 165.12 | 7.56            | -0.0061286    | -0.0071556    | 0.0104018     | 0.0248059     |
| 8.56                | 148.06                | 159.64 | 174.37 | 165.84 | 8.56            | -0.0047169    | 0.0042304     | 0.0103439     | 0.0292745     |
| 9.56                | 149.16                | 158.19 | 172.5  | 163.72 | 9.56            | 0.0026774     | -0.0048909    | -0.0004914    | 0.0161169     |
| 10.56               | 152.69                | 161.82 | 173.41 | 166.09 | 10.56           | 0.0264067     | 0.0179439     | 0.0047814     | 0.0308261     |
| 11.56               | 151.7                 | 162.37 | 174.78 | 168.28 | 11.56           | 0.0197517     | 0.0214037     | 0.0127195     | 0.0444182     |
| 12.56               | 151.77                | 162.05 | 174.05 | 163.33 | 12.56           | 0.0202223     | 0.0193908     | 0.0084897     | 0.0136964     |
| 13.56               | 150.2                 | 161.14 | 173.03 | 163.2  | 13.56           | 0.0096685     | 0.0136663     | 0.0025796     | 0.0128895     |
| 14.56               | 153.15                | 165.25 | 173.9  | 164.09 | 14.56           | 0.0294989     | 0.0395207     | 0.0076206     | 0.0184132     |
| 15.56               | 155.09                | 163.8  | 173.69 | 166.64 | 15.56           | 0.0425398     | 0.0303993     | 0.0064038     | 0.0342396     |
| 16.56               | 150.1                 | 166.07 | 175.04 | 161.01 | 16.56           | 0.0089963     | 0.0446789     | 0.0142261     | -0.0007026    |
| 17.56               | 154.25                | 166.13 | 177.32 | 164.94 | 17.56           | 0.0368932     | 0.0450564     | 0.0274369     | 0.0236887     |
| 18.56               | 157.03                | 166.11 | 172.83 | 166.63 | 18.56           | 0.0555808     | 0.0449306     | 0.0014208     | 0.0341776     |
| 19.56               | 155.71                | 167.18 | 176.88 | 165.91 | 19.56           | 0.0467076     | 0.0516615     | 0.0248875     | 0.0297089     |
| 20.56               | 160.7                 | 166.3  | 178.97 | 165.03 | 20.56           | 0.0802512     | 0.0461258     | 0.0369975     | 0.0242473     |
| 21.56               | 159.41                | 170.28 | 177.04 | 168.6  | 21.56           | 0.0715796     | 0.0711623     | 0.0258146     | 0.0464042     |
| 22.56               | 162.83                | 170.91 | 177.75 | 169.31 | 22.56           | 0.0945694     | 0.0751254     | 0.0299285     | 0.0508108     |
| 23.56               | 162.7                 | 172.64 | 183.11 | 171.32 | 23.56           | 0.0936955     | 0.0860081     | 0.0609857     | 0.0632857     |
| 24.56               | 170.29                | 177.04 | 185.26 | 176.96 | 24.56           | 0.1447167     | 0.1136868     | 0.0734433     | 0.0982900     |
| 25.56               | 174.25                | 186.61 | 198.78 | 182.16 | 25.56           | 0.1713364     | 0.1738877     | 0.1517816     | 0.1305634     |
| 26.56               | 181.64                | 194.9  | 211.26 | 198.04 | 26.56           | 0.2210132     | 0.2260368     | 0.2240939     | 0.2291216     |
| 27.56               | 195.23                | 212.82 | 228.23 | 212.78 | 27.56           | 0.3123674     | 0.3387642     | 0.3224224     | 0.3206044     |
| 28.56               | 219.16                | 238.59 | 259.45 | 240    | 28.56           | 0.4732287     | 0.5008728     | 0.5033189     | 0.4895434     |
| 29.56               | 244.88                | 260.66 | 295.52 | 274.34 | 29.56           | 0.6461226     | 0.6397062     | 0.7123177     | 0.7026722     |
| 30.56               | 273.79                | 298.15 | 337.96 | 307.04 | 30.56           | 0.8404603     | 0.8755406     | 0.9582258     | 0.9056225     |
| 31.56               | 303.25                | 328.11 | 371.46 | 341.67 | 31.56           | 1.0384951     | 1.0640068     | 1.1523332     | 1.1205512     |
| 32.56               | 337.1                 | 365.31 | 407.29 | 368.5  | 32.56           | 1.2660403     | 1.2980169     | 1.3599413     | 1.2870698     |
| 33.56               | 363.44                | 400.52 | 452.99 | 409.54 | 33.56           | 1.4431020     | 1.5195087     | 1.6247387     | 1.5417817     |
| 34.56               | 397.47                | 430.02 | 495.68 | 440.65 | 34.56           | 1.6718571     | 1.7050812     | 1.8720953     | 1.7348638     |
| 35.56               | 431.62                | 465.67 | 545.4  | 477.62 | 35.56           | 1.9014188     | 1.9293409     | 2.1601856     | 1.9643155     |
| 36.56               | 458.89                | 497.87 | 580.14 | 505.79 | 36.56           | 2.0847322     | 2.1318980     | 2.3614780     | 2.1391507     |
| 37.56               | 477.23                | 524.26 | 614.39 | 535.84 | 37.56           | 2.2080166     | 2.2979068     | 2.5599311     | 2.3256539     |
| 38.56               | 508.76                | 552.57 | 649.12 | 566.82 | 38.56           | 2.4199663     | 2.4759935     | 2.7611655     | 2.5179291     |
| 39.56               | 537.9                 | 587.81 | 686.66 | 603.48 | 39.56           | 2.6158500     | 2.6976741     | 2.9786818     | 2.7454569     |
| Parameter           | Parameter Value       |        |        |        | Parameter Value |               |               |               |               |
| a                   | 435.78                | 477.08 | 566.27 | 483.02 | a               | 2.929400      | 3.001100      | 3.281100      | 2.997800      |
| b                   | 3.15                  | 3.13   | 2.96   | 3.05   | b               | 3.153000      | 3.128800      | 2.959300      | 3.052000      |
| x0                  | 33.68                 | 33.65  | 33.65  | 33.52  | x0              | 33.681000     | 33.654700     | 33.653000     | 33.524400     |
| y0                  | 148.76                | 158.97 | 172.58 | 161.12 | y0              | 0.000000      | 0.000000      | 0.000000      | 0.000000      |
| R                   | 1.00                  | 1.00   | 1.00   | 1.00   | R               | 0.999323      | 0.999327      | 0.999203      | 0.998905      |
| CP <sub>(SDM)</sub> | 29.53                 | 29.53  | 29.76  | 29.50  |                 |               |               |               |               |

| D6                       |                                |                                | D7                       |                                |                                | D8                       |                                |
|--------------------------|--------------------------------|--------------------------------|--------------------------|--------------------------------|--------------------------------|--------------------------|--------------------------------|
| Well /<br>Cycle          | FAM Normalized<br>Fluorescence | VIC Normalized<br>Fluorescence | Well /<br>Cycle          | FAM Normalized<br>Fluorescence | VIC Normalized<br>Fluorescence | Well /<br>Cycle          | FAM Normalized<br>Fluorescence |
| 0.56                     | -0.0199395                     | -0.017421823                   | 0.56                     | -0.008084803                   | -0.010615377                   | 0.56                     | -0.0090932                     |
| 1.56                     | -0.0168661                     | -0.021253454                   | 1.56                     | -0.005987045                   | -0.01382358                    | 1.56                     | -0.0143915                     |
| 2.56                     | -0.0350742                     | -0.034025559                   | 2.56                     | -0.016064934                   | -0.027599981                   | 2.56                     | -0.0145028                     |
| 3.56                     | -0.0111067                     | -0.017152937                   | 3.56                     | -0.008711968                   | -0.022064258                   | 3.56                     | -0.0013682                     |
| 4.56                     | -0.0159622                     | -0.013590192                   | 4.56                     | -0.016951616                   | 0.001588375                    | 4.56                     | -0.0091822                     |
| 5.56                     | -0.0121656                     | -0.013590192                   | 5.56                     | -0.009512144                   | -0.00608615                    | 5.56                     | -0.0023700                     |
| 6.56                     | 0.0028916                      | 0.002341328                    | 6.56                     | 0.011530317                    | -0.003066665                   | 6.56                     | 0.0059560                      |
| 7.56                     | -0.0119073                     | -0.006128594                   | 7.56                     | -0.013902297                   | -0.007155551                   | 7.56                     | -0.0037057                     |
| 8.56                     | 0.0086769                      | -0.00471694                    | 8.56                     | 0.010470624                    | 0.004230424                    | 8.56                     | 0.0057111                      |
| 9.56                     | 0.0075146                      | 0.002677436                    | 9.56                     | 0.01401735                     | -0.004890937                   | 9.56                     | 0.0102526                      |
| 10.56                    | 0.0145396                      | 0.026406662                    | 10.56                    | 0.006945526                    | 0.017943919                    | 10.56                    | 0.0165527                      |
| 11.56                    | 0.0055518                      | 0.019751724                    | 11.56                    | 0.006988779                    | 0.021403746                    | 11.56                    | 0.0098519                      |
| 12.56                    | 0.0267042                      | 0.020222275                    | 12.56                    | 0.013606448                    | 0.019390756                    | 12.56                    | 0.0229642                      |
| 13.56                    | 0.0275306                      | 0.009668483                    | 13.56                    | 0.022624646                    | 0.013666315                    | 13.56                    | 0.0262145                      |
| 14.56                    | 0.0313531                      | 0.029498856                    | 14.56                    | 0.026755283                    | 0.039520657                    | 14.56                    | 0.0197807                      |
| 15.56                    | 0.0264976                      | 0.042539847                    | 15.56                    | 0.029761349                    | 0.030399295                    | 15.56                    | 0.0173096                      |
| 16.58                    | 0.0362602                      | 0.008996267                    | 16.58                    | 0.016677393                    | 0.044678944                    | 16.58                    | 0.0253463                      |
| 17.58                    | 0.0333934                      | 0.036893233                    | 17.58                    | 0.039017436                    | 0.045056379                    | 17.58                    | 0.0328708                      |
| 18.58                    | 0.0384813                      | 0.055580838                    | 18.58                    | 0.034129876                    | 0.044930568                    | 18.58                    | 0.0242777                      |
| 19.58                    | 0.0407025                      | 0.046707587                    | 19.58                    | 0.029501832                    | 0.051661503                    | 19.58                    | 0.0194245                      |
| 20.58                    | 0.0466169                      | 0.080251167                    | 20.58                    | 0.035924865                    | 0.04612578                     | 20.58                    | 0.0230978                      |
| 21.58                    | 0.0256453                      | 0.07157958                     | 21.58                    | 0.028593525                    | 0.071162345                    | 21.58                    | 0.0296428                      |
| 22.58                    | 0.0417614                      | 0.094569368                    | 22.58                    | 0.038822799                    | 0.075125419                    | 22.58                    | 0.0293534                      |
| 23.58                    | 0.0595821                      | 0.093695487                    | 23.58                    | 0.054696556                    | 0.086008146                    | 23.58                    | 0.0557340                      |
| 24.58                    | 0.0742518                      | 0.144716684                    | 24.58                    | 0.059000204                    | 0.11368676                     | 24.58                    | 0.0516823                      |
| 25.58                    | 0.1047536                      | 0.171336439                    | 25.58                    | 0.109865432                    | 0.173887744                    | 25.58                    | 0.0952714                      |
| 26.58                    | 0.1407824                      | 0.221013204                    | 26.58                    | 0.138325738                    | 0.226036769                    | 26.58                    | 0.1188024                      |
| 27.58                    | 0.2199166                      | 0.312367363                    | 27.58                    | 0.222755096                    | 0.338764213                    | 27.58                    | 0.2044001                      |
| 28.56                    | 0.2618340                      | 0.47322866                     | 28.56                    | 0.268732764                    | 0.50087282                     | 28.56                    | 0.2657766                      |
| 29.61                    | 0.3888516                      | 0.646122624                    | 29.61                    | 0.391613812                    | 0.639706229                    | 29.61                    | 0.3941396                      |
| 30.56                    | 0.5158434                      | 0.84046028                     | 30.56                    | 0.505649674                    | 0.875540598                    | 30.56                    | 0.5009530                      |
| 31.63                    | 0.6157942                      | 1.038495123                    | 31.63                    | 0.62574092                     | 1.064006794                    | 31.63                    | 0.5921607                      |
| 32.63                    | 0.7319903                      | 1.266040251                    | 32.63                    | 0.752644473                    | 1.29801689                     | 32.63                    | 0.7239522                      |
| 33.63                    | 0.7998897                      | 1.443101954                    | 33.63                    | 0.836403413                    | 1.519508705                    | 33.63                    | 0.7858407                      |
| 34.63                    | 0.9490927                      | 1.671857071                    | 34.63                    | 0.957489472                    | 1.705081227                    | 34.63                    | 0.9085492                      |
| 35.63                    | 1.0279428                      | 1.901418846                    | 35.63                    | 1.057165423                    | 1.929340903                    | 35.63                    | 0.9868004                      |
| 36.63                    | 1.1606166                      | 2.084732159                    | 36.63                    | 1.181992844                    | 2.131898029                    | 36.63                    | 1.1066816                      |
| 37.65                    | 1.2623753                      | 2.20801658                     | 37.65                    | 1.291919695                    | 2.297906805                    | 37.65                    | 1.2316163                      |
| 38.65                    | 1.3924147                      | 2.419966295                    | 38.65                    | 1.436210852                    | 2.475993521                    | 38.65                    | 1.3198854                      |
| 39.65                    | 1.4524627                      | 2.615850047                    | 39.65                    | 1.502452431                    | 2.697674053                    | 39.65                    | 1.3979140                      |
| ment derived linear regr |                                |                                | ment derived linear regr |                                |                                | ment derived linear regr |                                |
| parameter                | value                          |                                | parameter                | value                          |                                | parameter                | value                          |
| y0                       | 0.016                          |                                | y0                       | 0.0109                         |                                | y0                       | 0.0183                         |
| a                        | 0.5739                         |                                | a                        | 0.5722                         |                                | a                        | 0.5106                         |

**D9**

| VIC Normalized Fluorescence | Well / Cycle | FAM Normal ized Fluorescence | VIC Normalized Fluorescence |
|-----------------------------|--------------|------------------------------|-----------------------------|
| 0.023323027                 | 0.56         | -0.022620976                 | -0.021494111                |
| 0.018455855                 | 1.56         | -0.033740488                 | -0.012122401                |
| 0.030565844                 | 2.56         | -0.02741019                  | -0.000516375                |
| 0.010459786                 | 3.56         | -0.015555699                 | 0.006496892                 |
| 0.035780671                 | 4.56         | -0.012449823                 | 0.007862307                 |
| 0.035375074                 | 5.56         | -0.014417668                 | 0.014130802                 |
| 0.022453889                 | 6.56         | 0.005877219                  | 0.008669143                 |
| 0.010401843                 | 7.56         | 0.006351399                  | 0.024805863                 |
| 0.010343901                 | 8.56         | 0.005023696                  | 0.029274493                 |
| -0.000491353                | 9.56         | 0.004810315                  | 0.01611686                  |
| 0.004781418                 | 10.56        | 0.022758014                  | 0.030826101                 |
| 0.012719544                 | 11.56        | 0.019723264                  | 0.044418184                 |
| 0.00848974                  | 12.56        | 0.033261092                  | 0.013696352                 |
| 0.002579601                 | 13.56        | 0.027523519                  | 0.012889516                 |
| 0.007620602                 | 14.56        | 0.047462772                  | 0.018413239                 |
| 0.006403808                 | 15.56        | 0.027523519                  | 0.034239638                 |
| 0.01422605                  | 16.58        | 0.021738527                  | -0.000702568                |
| 0.027436947                 | 17.58        | 0.029277983                  | 0.023688705                 |
| 0.001420751                 | 18.58        | 0.032905457                  | 0.034177573                 |
| 0.024887476                 | 19.58        | 0.031364374                  | 0.029708943                 |
| 0.036997464                 | 20.58        | 0.031174702                  | 0.024247284                 |
| 0.025814556                 | 21.58        | 0.022805432                  | 0.046404242                 |
| 0.029928476                 | 22.58        | 0.041251019                  | 0.050810808                 |
| 0.060985672                 | 23.58        | 0.056495893                  | 0.063285734                 |
| 0.073443316                 | 24.58        | 0.067070099                  | 0.098290004                 |
| 0.151781617                 | 25.58        | 0.106166208                  | 0.130563445                 |
| 0.224093895                 | 26.58        | 0.137201264                  | 0.229121567                 |
| 0.322422369                 | 27.58        | 0.227105719                  | 0.320604357                 |
| 0.503318948                 | 28.56        | 0.317294682                  | 0.489543405                 |
| 0.712317655                 | 29.61        | 0.398166015                  | 0.702672241                 |
| 0.958225753                 | 30.56        | 0.508578739                  | 0.90562253                  |
| 1.15233323                  | 31.63        | 0.611167499                  | 1.12055123                  |
| 1.359941316                 | 32.63        | 0.722267783                  | 1.28706977                  |
| 1.624738679                 | 33.63        | 0.799630187                  | 1.541781693                 |
| 1.872095341                 | 34.63        | 0.911346905                  | 1.734863756                 |
| 2.160185602                 | 35.63        | 0.977542379                  | 1.964315505                 |
| 2.361477952                 | 36.63        | 1.121266221                  | 2.139150662                 |
| 2.559931118                 | 37.65        | 1.191089169                  | 2.32565391                  |
| 2.761165526                 | 38.65        | 1.300434989                  | 2.517929137                 |
| 2.978681784                 | 39.65        | 1.353163762                  | 2.745456893                 |

Priment derived linear regres:

| paramete | value  |
|----------|--------|
| y0       | 0.0406 |
| a        | 0.5213 |

**AVERAGE**

Priment derived linear regres:

| paramete | value   |
|----------|---------|
| y0       | 0.02145 |
| a        | 0.5445  |
| R        |         |

| Well /<br>Cycle           | Raw fluorescence data |        |        |        | Well /<br>Cycle  | E2 Normalized | E3 Normalized | E4 Normalized | E5 Normalized |
|---------------------------|-----------------------|--------|--------|--------|------------------|---------------|---------------|---------------|---------------|
|                           | E2                    | E3     | E4     | E5     |                  | Fluorescence  | Fluorescence  | Fluorescence  | Fluorescence  |
| 0.56                      | 343.45                | 356.36 | 348.07 | 386.88 | 0.56             | -0.0300100    | -0.0119037    | -0.0306628    | -0.0133801    |
| 1.56                      | 345.55                | 361.16 | 356.94 | 389.4  | 1.56             | -0.0240790    | 0.0014055     | -0.0059608    | -0.0069536    |
| 2.56                      | 347.17                | 354.32 | 350.74 | 382.91 | 2.56             | -0.0195037    | -0.0175601    | -0.0232271    | -0.0235044    |
| 3.56                      | 352.38                | 359.62 | 353.46 | 389.01 | 3.56             | -0.0047894    | -0.0028645    | -0.0156522    | -0.0079482    |
| 4.56                      | 347.77                | 355.21 | 354.14 | 389.13 | 4.56             | -0.0178092    | -0.0150923    | -0.0137585    | -0.0076422    |
| 5.56                      | 350.98                | 353.04 | 356.22 | 387.79 | 5.56             | -0.0087433    | -0.0211092    | -0.0079659    | -0.0110594    |
| 6.56                      | 356.35                | 364.54 | 361.57 | 394    | 6.56             | 0.0064229     | 0.0107774     | 0.0069333     | 0.0047773     |
| 7.56                      | 352.81                | 360.94 | 358.72 | 392.81 | 7.56             | -0.0035749    | 0.0007955     | -0.0010037    | 0.0017425     |
| 8.56                      | 357.54                | 365.53 | 362.69 | 400.92 | 8.56             | 0.0097838     | 0.0135224     | 0.0100523     | 0.0224246     |
| 9.56                      | 357.11                | 360.41 | 357.72 | 391.22 | 9.56             | 0.0085694     | -0.0006741    | -0.0037886    | -0.0023123    |
| 10.56                     | 358.51                | 366.76 | 368.4  | 396.27 | 10.56            | 0.0125233     | 0.0169329     | 0.0259541     | 0.0105662     |
| 11.56                     | 356.02                | 360.1  | 361.43 | 394.59 | 11.56            | 0.0054909     | -0.0015336    | 0.0065434     | 0.0062819     |
| 12.56                     | 359.6                 | 366.65 | 365.99 | 400.8  | 12.56            | 0.0156017     | 0.0166279     | 0.0192425     | 0.0221186     |
| 13.56                     | 361.95                | 364.73 | 367.9  | 400.37 | 13.56            | 0.0222387     | 0.0113042     | 0.0245616     | 0.0210220     |
| 14.56                     | 364.2                 | 369.12 | 366.59 | 400.19 | 14.56            | 0.0285933     | 0.0234766     | 0.0209134     | 0.0205630     |
| 15.56                     | 363.07                | 368.96 | 369.68 | 398.82 | 15.56            | 0.0254019     | 0.0230329     | 0.0295187     | 0.0170692     |
| 16.58                     | 365.26                | 365.88 | 362.73 | 399.97 | 16.58            | 0.0315870     | 0.0144929     | 0.0101637     | 0.0200020     |
| 17.58                     | 367.93                | 369.69 | 368.01 | 399.22 | 17.58            | 0.0391278     | 0.0250570     | 0.0248680     | 0.0180893     |
| 18.58                     | 362.04                | 369.13 | 369    | 400.44 | 18.58            | 0.0224929     | 0.0235043     | 0.0276250     | 0.0212005     |
| 19.58                     | 367.77                | 371.52 | 369.62 | 401.39 | 19.58            | 0.0386759     | 0.0301312     | 0.0293516     | 0.0236232     |
| 20.58                     | 366.52                | 373.91 | 371.09 | 402.05 | 20.58            | 0.0351456     | 0.0367580     | 0.0334454     | 0.0253064     |
| 21.58                     | 363.33                | 363.29 | 365.72 | 397.32 | 21.58            | 0.0261362     | 0.0073115     | 0.0184906     | 0.0132439     |
| 22.58                     | 367.01                | 370.95 | 369.68 | 400.72 | 22.58            | 0.0365295     | 0.0285507     | 0.0295187     | 0.0219146     |
| 23.58                     | 376.16                | 377.6  | 376.99 | 405.54 | 23.58            | 0.0623714     | 0.0469895     | 0.0498763     | 0.0342065     |
| 24.58                     | 375.56                | 377.27 | 374.29 | 410.37 | 24.58            | 0.0606768     | 0.0460745     | 0.0423571     | 0.0465240     |
| 25.58                     | 386.53                | 391.76 | 387.83 | 419.52 | 25.58            | 0.0916589     | 0.0862516     | 0.0800645     | 0.0698583     |
| 26.58                     | 395.19                | 397.78 | 393.47 | 429.18 | 26.58            | 0.1161169     | 0.1029435     | 0.0957713     | 0.0944932     |
| 27.58                     | 419.1                 | 427.04 | 415.87 | 458.26 | 27.58            | 0.1836449     | 0.1840741     | 0.1581529     | 0.1686529     |
| 28.56                     | 428.3                 | 433.39 | 427.67 | 463.18 | 28.56            | 0.2096280     | 0.2016811     | 0.1910146     | 0.1811999     |
| 29.61                     | 450.05                | 466.42 | 466.28 | 504.75 | 29.61            | 0.2710555     | 0.2932649     | 0.2985393     | 0.2872115     |
| 30.56                     | 478.38                | 497.73 | 493.74 | 542.93 | 30.56            | 0.3510666     | 0.3800796     | 0.3750124     | 0.3845780     |
| 31.63                     | 498.26                | 528.94 | 520.32 | 571.75 | 31.63            | 0.4072128     | 0.4666171     | 0.4490348     | 0.4580746     |
| 32.63                     | 535.07                | 563.75 | 556.1  | 616.86 | 32.63            | 0.5111736     | 0.5631364     | 0.5486782     | 0.5731140     |
| 33.63                     | 548.91                | 588.59 | 580.52 | 642.43 | 33.63            | 0.5502613     | 0.6320115     | 0.6166853     | 0.6383225     |
| 34.63                     | 588.22                | 627.64 | 613.63 | 679.89 | 34.63            | 0.6612827     | 0.7402873     | 0.7088931     | 0.7338529     |
| 35.63                     | 609.67                | 651.15 | 638.38 | 708.92 | 35.63            | 0.7218629     | 0.8054746     | 0.7778191     | 0.8078851     |
| 36.63                     | 650.05                | 691.8  | 679.25 | 753.71 | 36.63            | 0.8359063     | 0.9181868     | 0.8916376     | 0.9221083     |
| 37.65                     | 675.27                | 726.57 | 706.27 | 786.44 | 37.65            | 0.9071340     | 1.0145952     | 0.9668854     | 1.0055763     |
| 38.65                     | 710.1                 | 766.6  | 746.73 | 824.8  | 38.65            | 1.0055028     | 1.1255883     | 1.0795621     | 1.1034018     |
| 39.65                     | 730.24                | 780.75 | 762.85 | 851.45 | 39.65            | 1.0623833     | 1.1648227     | 1.1244546     | 1.1713645     |
| <b>Parameter</b>          |                       |        |        |        | <b>Parameter</b> | <b>Value</b>  |               |               |               |
| a                         | 484.03                | 501.13 | 475.7  | 525.99 | <b>a</b>         | 1.367         | 1.3895        | 1.3248        | 1.3414        |
| b                         | 3.8025                | 3.3699 | 3.3483 | 3.2047 | <b>b</b>         | 3.8025        | 3.3699        | 3.3483        | 3.2047        |
| x0                        | 34.935                | 34.183 | 34.081 | 33.93  | <b>x0</b>        | 34.9352       | 34.1826       | 34.0809       | 33.9304       |
| y0                        | 354.08                | 360.65 | 359.08 | 392.13 | <b>y0</b>        | 0             | 0             | 0             | 0             |
| R                         | 0.9988                | 0.9989 | 0.9985 | 0.9987 | <b>R</b>         | 0.99880422    | 0.99886415    | 0.99853295    | 0.9987139     |
| <b>CP<sub>(SDM)</sub></b> | 29.93                 | 29.74  | 29.67  | 29.71  |                  |               |               |               |               |

| Well /<br>Cycle     | Raw fluorescence data |          |      |          | Well /<br>Cycle | E2 Normalized | E3 Normalized | E4 Normalized | E5 Normalized |
|---------------------|-----------------------|----------|------|----------|-----------------|---------------|---------------|---------------|---------------|
|                     | E2                    | E3       | E4   | E5       |                 | Fluorescence  | Fluorescence  | Fluorescence  | Fluorescence  |
| 0.56                | 108.23                | 126.72   | 141  | 129.32   | 0.56            | -0.0320359    | -0.0051938    | -0.0071755    | -0.0071630    |
| 1.56                | 110.89                | 126.28   | 140  | 125.94   | 1.56            | -0.0082460    | -0.0086480    | -0.0174464    | -0.0331125    |
| 2.56                | 109.04                | 126.56   | 139  | 126.93   | 2.56            | -0.0247916    | -0.0064499    | -0.0234963    | -0.0255119    |
| 3.56                | 111.17                | 126.04   | 140  | 126.39   | 3.56            | -0.0057418    | -0.0105321    | -0.0168836    | -0.0296577    |
| 4.56                | 110.59                | 125.59   | 139  | 127.5    | 4.56            | -0.0109291    | -0.0140648    | -0.0201899    | -0.0211358    |
| 5.56                | 110.8                 | 129.04   | 140  | 130.02   | 5.56            | -0.0090509    | 0.0130191     | -0.0171650    | -0.0017888    |
| 6.56                | 111.14                | 127.47   | 143  | 130.46   | 6.56            | -0.0060101    | 0.0006940     | 0.0088639     | 0.0015892     |
| 7.56                | 111.9                 | 128.46   | 144  | 128.96   | 7.56            | 0.0007870     | 0.0084659     | 0.0094970     | -0.0099268    |
| 8.56                | 112.4                 | 127.75   | 144  | 131.49   | 8.56            | 0.0052588     | 0.0028921     | 0.0113261     | 0.0094969     |
| 9.56                | 113.66                | 128.39   | 145  | 131.24   | 9.56            | 0.0165277     | 0.0079164     | 0.0202603     | 0.0075776     |
| 10.56               | 113.76                | 127.53   | 145  | 133.49   | 10.56           | 0.0174221     | 0.0011650     | 0.0170946     | 0.0248516     |
| 11.56               | 114.28                | 129.38   | 147  | 134.07   | 11.56           | 0.0220728     | 0.0156883     | 0.0329230     | 0.0293045     |
| 12.56               | 115.22                | 130.07   | 144  | 134.9    | 12.56           | 0.0304797     | 0.0211051     | 0.0156173     | 0.0356767     |
| 13.56               | 113.94                | 130.64   | 144  | 132.29   | 13.56           | 0.0190319     | 0.0255798     | 0.0118185     | 0.0156388     |
| 14.56               | 115.09                | 131.01   | 146  | 134      | 14.56           | 0.0293171     | 0.0284845     | 0.0255364     | 0.0287671     |
| 15.56               | 115.59                | 131.51   | 145  | 134.66   | 15.56           | 0.0337889     | 0.0324097     | 0.0227928     | 0.0338342     |
| 16.58               | 116.13                | 131.11   | 148  | 135.15   | 16.58           | 0.0386184     | 0.0292695     | 0.0417165     | 0.0375961     |
| 17.58               | 115.64                | 130.13   | 147  | 134.88   | 17.58           | 0.0342360     | 0.0215761     | 0.0365811     | 0.0355232     |
| 18.58               | 116.72                | 131.92   | 147  | 134.01   | 18.58           | 0.0438951     | 0.0356284     | 0.0370735     | 0.0288439     |
| 19.58               | 116.47                | 132.06   | 149  | 137.31   | 19.58           | 0.0416592     | 0.0367274     | 0.0481182     | 0.0541792     |
| 20.58               | 117.43                | 131.24   | 148  | 135.95   | 20.58           | 0.0502451     | 0.0302901     | 0.0441787     | 0.0437380     |
| 21.58               | 117.53                | 134.31   | 154  | 140.02   | 21.58           | 0.0511394     | 0.0543909     | 0.0845586     | 0.0749848     |
| 22.58               | 120.75                | 136.23   | 153  | 142.3    | 22.58           | 0.0799378     | 0.0694637     | 0.0780162     | 0.0924892     |
| 23.58               | 121.61                | 139.14   | 156  | 143.8    | 23.58           | 0.0876292     | 0.0923085     | 0.0984875     | 0.1040053     |
| 24.58               | 126.29                | 142.63   | 160  | 148.74   | 24.58           | 0.1294852     | 0.1197065     | 0.1245867     | 0.1419315     |
| 25.58               | 129.88                | 146.69   | 166  | 153.6    | 25.58           | 0.1615927     | 0.1515792     | 0.1705241     | 0.1792435     |
| 26.58               | 140.16                | 155.39   | 178  | 164.65   | 26.58           | 0.2535327     | 0.2198779     | 0.2493141     | 0.2640784     |
| 27.58               | 149.5                 | 170.66   | 195  | 178.76   | 27.58           | 0.3370658     | 0.3397539     | 0.3727049     | 0.3724060     |
| 28.56               | 162.11                | 190.45   | 219  | 201.56   | 28.56           | 0.4498444     | 0.4951139     | 0.5407668     | 0.5474500     |
| 29.61               | 182.39                | 216.43   | 251  | 225.52   | 29.61           | 0.6312203     | 0.6990680     | 0.7670770     | 0.7313997     |
| 30.56               | 202.26                | 241.72   | 284  | 251.71   | 30.56           | 0.8089293     | 0.8976053     | 0.9998593     | 0.9324699     |
| 31.63               | 219.42                | 268.04   | 320  | 278.27   | 31.63           | 0.9624012     | 1.1042286     | 1.2518466     | 1.1363807     |
| 32.63               | 240.31                | 289.84   | 350  | 305.17   | 32.63           | 1.1492326     | 1.2753679     | 1.4630320     | 1.3429019     |
| 33.63               | 259.81                | 320.41   | 385  | 340.2    | 33.63           | 1.3236325     | 1.5153554     | 1.7065072     | 1.6118400     |
| 34.63               | 276.89                | 345.31   | 413  | 366.13   | 34.63           | 1.4763889     | 1.7108311     | 1.9085473     | 1.8109141     |
| 35.63               | 299.34                | 372.26   | 449  | 396.2    | 35.63           | 1.6771724     | 1.9224001     | 2.1584945     | 2.0417726     |
| 36.63               | 313.66                | 388.52   | 476  | 416.61   | 36.63           | 1.8052445     | 2.0500480     | 2.3490679     | 2.1984676     |
| 37.65               | 331.88                | 407.83   | 497  | 437.78   | 37.65           | 1.9681966     | 2.2016398     | 2.4979247     | 2.3609974     |
| 38.65               | 346.39                | 429.61   | 523  | 463.37   | 38.65           | 2.0979680     | 2.3726221     | 2.6812522     | 2.5574612     |
| 39.65               | 365.51                | 454.19   | 554  | 483.1    | 39.65           | 2.2689693     | 2.5655856     | 2.8970102     | 2.7089357     |
| Parameter           | Parameter Value       |          |      |          |                 |               |               |               |               |
| a                   | 281.43                | 349.2124 | 441  | 388.4996 | a               | 2.517         | 2.7415        | 3.1007        | 2.9827        |
| b                   | 3.2306                | 2.9812   | 2.96 | 3.0748   | b               | 3.2306        | 2.9812        | 2.9601        | 3.0748        |
| x0                  | 33.332                | 33.0373  | 33.1 | 33.2256  | x0              | 33.3316       | 33.0373       | 33.0586       | 33.2256       |
| y0                  | 111.81                | 127.3816 | 142  | 130.253  | y0              | 0             | 0             | 0             | 0             |
| R                   | 0.9993                | 0.999223 | 1    | 0.999508 | R               | 0.99933057    | 0.99922339    | 0.99924734    | 0.99950843    |
| CP <sub>(SDM)</sub> | 29.08                 | 29.11    | #### | 29.18    |                 |               |               |               |               |

| E2                                   |                               |                               | E3                                   |                                |                                | E4                                   |                                |
|--------------------------------------|-------------------------------|-------------------------------|--------------------------------------|--------------------------------|--------------------------------|--------------------------------------|--------------------------------|
| Well /<br>Cycle                      | AM Normalized<br>Fluorescence | IC Normalized<br>Fluorescence | Well /<br>Cycle                      | FAM Normalized<br>Fluorescence | VIC Normalized<br>Fluorescence | Well /<br>Cycle                      | FAM Normalized<br>Fluorescence |
| 0.56                                 | -0.0300100                    | -0.03203592                   | 0.56                                 | -0.011903683                   | -0.005193843                   | 0.56                                 | -0.0306628                     |
| 1.56                                 | -0.0240790                    | -0.00824598                   | 1.56                                 | 0.001405506                    | -0.008648031                   | 1.56                                 | -0.0059608                     |
| 2.56                                 | -0.0195037                    | -0.02479161                   | 2.56                                 | -0.017560088                   | -0.006449911                   | 2.56                                 | -0.0232271                     |
| 3.56                                 | -0.0047894                    | -0.00574178                   | 3.56                                 | -0.002864525                   | -0.010532133                   | 3.56                                 | -0.0156522                     |
| 4.56                                 | -0.0178092                    | -0.01092906                   | 4.56                                 | -0.015092342                   | -0.014064826                   | 4.56                                 | -0.0137585                     |
| 5.56                                 | -0.0087433                    | -0.00905091                   | 5.56                                 | -0.021109204                   | 0.013019149                    | 5.56                                 | -0.0079659                     |
| 6.56                                 | 0.0064229                     | -0.00601009                   | 6.56                                 | 0.010777392                    | 0.000693978                    | 6.56                                 | 0.0069333                      |
| 7.56                                 | -0.0035749                    | 0.000787035                   | 7.56                                 | 0.000795501                    | 0.008465901                    | 7.56                                 | -0.0010037                     |
| 8.56                                 | 0.0097838                     | 0.005258827                   | 8.56                                 | 0.013522413                    | 0.002892097                    | 8.56                                 | 0.0100523                      |
| 9.56                                 | 0.0085694                     | 0.016527743                   | 9.56                                 | -0.000674055                   | 0.007916371                    | 9.56                                 | -0.0037886                     |
| 10.56                                | 0.0125233                     | 0.017422101                   | 10.56                                | 0.016932892                    | 0.001165003                    | 10.56                                | 0.0259541                      |
| 11.56                                | 0.0054909                     | 0.022072765                   | 11.56                                | -0.001533607                   | 0.015688294                    | 11.56                                | 0.0065434                      |
| 12.56                                | 0.0156017                     | 0.030479734                   | 12.56                                | 0.01662789                     | 0.021105089                    | 12.56                                | 0.0192425                      |
| 13.56                                | 0.0222387                     | 0.019031946                   | 13.56                                | 0.011304214                    | 0.025579833                    | 13.56                                | 0.0245616                      |
| 14.56                                | 0.0285933                     | 0.029317068                   | 14.56                                | 0.023476576                    | 0.028484491                    | 14.56                                | 0.0209134                      |
| 15.56                                | 0.0254019                     | 0.03378886                    | 15.56                                | 0.023032937                    | 0.032409704                    | 15.56                                | 0.0295187                      |
| 16.58                                | 0.0315870                     | 0.038618395                   | 16.58                                | 0.014492874                    | 0.029269533                    | 16.58                                | 0.0101637                      |
| 17.58                                | 0.0391278                     | 0.034236039                   | 17.58                                | 0.025057042                    | 0.021576115                    | 17.58                                | 0.0248680                      |
| 18.58                                | 0.0224929                     | 0.04389511                    | 18.58                                | 0.023504304                    | 0.03562838                     | 18.58                                | 0.0276250                      |
| 19.58                                | 0.0386759                     | 0.041659214                   | 19.58                                | 0.03013117                     | 0.036727439                    | 19.58                                | 0.0293516                      |
| 20.58                                | 0.0351456                     | 0.050245054                   | 20.58                                | 0.036758037                    | 0.030290089                    | 20.58                                | 0.0334454                      |
| 21.58                                | 0.0261362                     | 0.051139413                   | 21.58                                | 0.007311458                    | 0.054390901                    | 21.58                                | 0.0184906                      |
| 22.58                                | 0.0365295                     | 0.079937753                   | 22.58                                | 0.028550704                    | 0.069463722                    | 22.58                                | 0.0295187                      |
| 23.58                                | 0.0623714                     | 0.087629235                   | 23.58                                | 0.046989475                    | 0.092308465                    | 23.58                                | 0.0498763                      |
| 24.58                                | 0.0606768                     | 0.129485207                   | 24.58                                | 0.046074469                    | 0.119706457                    | 24.58                                | 0.0423571                      |
| 25.58                                | 0.0916589                     | 0.161592673                   | 25.58                                | 0.086251581                    | 0.151579192                    | 25.58                                | 0.0800645                      |
| 26.58                                | 0.1161169                     | 0.253532716                   | 26.58                                | 0.102943521                    | 0.21987791                     | 26.58                                | 0.0957713                      |
| 27.58                                | 0.1836449                     | 0.337065789                   | 27.58                                | 0.184074114                    | 0.339753936                    | 27.58                                | 0.1581529                      |
| 28.56                                | 0.2096280                     | 0.449844382                   | 28.56                                | 0.201681061                    | 0.495113894                    | 28.56                                | 0.1910146                      |
| 29.61                                | 0.2710555                     | 0.631220263                   | 29.61                                | 0.293264913                    | 0.699067997                    | 29.61                                | 0.2985393                      |
| 30.56                                | 0.3510666                     | 0.808929274                   | 30.56                                | 0.380079639                    | 0.897605306                    | 30.56                                | 0.3750124                      |
| 31.63                                | 0.4072128                     | 0.962401173                   | 31.63                                | 0.46661709                     | 1.104228554                    | 31.63                                | 0.4490348                      |
| 32.63                                | 0.5111736                     | 1.149232641                   | 32.63                                | 0.563136432                    | 1.275367871                    | 32.63                                | 0.5486782                      |
| 33.63                                | 0.5502613                     | 1.323632526                   | 33.63                                | 0.632011481                    | 1.515355436                    | 33.63                                | 0.6166853                      |
| 34.63                                | 0.6612827                     | 1.476388939                   | 34.63                                | 0.740287273                    | 1.710831078                    | 34.63                                | 0.7088931                      |
| 35.63                                | 0.7218629                     | 1.677172397                   | 35.63                                | 0.805474568                    | 1.922400095                    | 35.63                                | 0.7778191                      |
| 36.63                                | 0.8359063                     | 1.805244518                   | 36.63                                | 0.918186756                    | 2.050048045                    | 36.63                                | 0.8916376                      |
| 37.65                                | 0.9071340                     | 1.968196616                   | 37.65                                | 1.014595189                    | 2.201639797                    | 37.65                                | 0.9668854                      |
| 38.65                                | 1.0055028                     | 2.097968018                   | 38.65                                | 1.125588273                    | 2.372622106                    | 38.65                                | 1.0795621                      |
| 39.65                                | 1.0623833                     | 2.268969341                   | 39.65                                | 1.164822651                    | 2.56558561                     | 39.65                                | 1.1244546                      |
| Experiment derived linear regression |                               |                               | Experiment derived linear regression |                                |                                | Experiment derived linear regression |                                |
| parameter                            | value                         |                               | parameter                            | value                          |                                | parameter                            | value                          |
| y0                                   | 0.0234                        |                               | y0                                   | 0.0171                         |                                | y0                                   | 0.0132                         |
| a                                    | 0.4111                        |                               | a                                    | 0.4132                         |                                | a                                    | 0.3595                         |
| R                                    | 0.99617478                    |                               | R                                    | 0.99567293                     |                                | R                                    | 0.99790205                     |

E5

| VIC Normalized Fluorescence | Well / Cycle | AM Normalized Fluorescence | VIC Normalized Fluorescence |
|-----------------------------|--------------|----------------------------|-----------------------------|
| -0.007175519                | 0.56         | -0.01338011                | -0.007162983                |
| -0.017446359                | 1.56         | -0.00695362                | -0.033112481                |
| -0.023496307                | 2.56         | -0.02350439                | -0.025511888                |
| -0.016883574                | 3.56         | -0.0079482                 | -0.029657666                |
| -0.02018994                 | 4.56         | -0.00764217                | -0.02113579                 |
| -0.017164967                | 5.56         | -0.01105944                | -0.001788826                |
| 0.008863876                 | 6.56         | 0.004777282                | 0.001589215                 |
| 0.00949701                  | 7.56         | 0.001742549                | -0.009926835                |
| 0.011326064                 | 8.56         | 0.02242464                 | 0.009496902                 |
| 0.020260288                 | 9.56         | -0.00231226                | 0.007577561                 |
| 0.017094618                 | 10.56        | 0.010566228                | 0.024851635                 |
| 0.032922969                 | 11.56        | 0.006281898                | 0.029304507                 |
| 0.015617306                 | 12.56        | 0.022118616                | 0.035676721                 |
| 0.011818502                 | 13.56        | 0.021022032                | 0.015638795                 |
| 0.025536405                 | 14.56        | 0.020562997                | 0.028767092                 |
| 0.022792824                 | 15.56        | 0.017069228                | 0.033834154                 |
| 0.041716497                 | 16.58        | 0.020001953                | 0.037596063                 |
| 0.036581076                 | 17.58        | 0.018089306                | 0.035523174                 |
| 0.037073514                 | 18.58        | 0.021200546                | 0.028843865                 |
| 0.048118185                 | 19.58        | 0.023623232                | 0.054179174                 |
| 0.044178684                 | 20.58        | 0.025306361                | 0.043737956                 |
| 0.084558565                 | 21.58        | 0.013243934                | 0.074984837                 |
| 0.07801618                  | 22.58        | 0.021914601                | 0.092489232                 |
| 0.098487513                 | 23.58        | 0.034206546                | 0.104005282                 |
| 0.124586704                 | 24.58        | 0.046523993                | 0.141931472                 |
| 0.170524094                 | 25.58        | 0.069858288                | 0.179243472                 |
| 0.249314105                 | 26.58        | 0.094493183                | 0.264078371                 |
| 0.372704889                 | 27.58        | 0.168652887                | 0.37240601                  |
| 0.540766796                 | 28.56        | 0.181199852                | 0.547449963                 |
| 0.767077031                 | 29.61        | 0.287211506                | 0.731399661                 |
| 0.999859304                 | 30.56        | 0.384577995                | 0.932469886                 |
| 1.251846641                 | 31.63        | 0.458074648                | 1.136380736                 |
| 1.463032008                 | 32.63        | 0.573113996                | 1.342901891                 |
| 1.706507211                 | 33.63        | 0.638322512                | 1.611840034                 |
| 1.908547309                 | 34.63        | 0.733852859                | 1.810914144                 |
| 2.158494548                 | 35.63        | 0.807885053                | 2.04177255                  |
| 2.349067886                 | 36.63        | 0.922108339                | 2.198467598                 |
| 2.497924727                 | 37.65        | 1.005576259                | 2.360997443                 |
| 2.681252198                 | 38.65        | 1.103401783                | 2.557461248                 |
| 2.8970102                   | 39.65        | 1.171364511                | 2.708935687                 |

| Linear regression derived parameter |            |
|-------------------------------------|------------|
| parameter                           | value      |
| y0                                  | -0.0161    |
| a                                   | 0.426      |
| R                                   | 0.99444647 |

**AVERAGE**

| Linear regression derived parameter |         |
|-------------------------------------|---------|
| parameter                           | value   |
| y0                                  | 0.0094  |
| a                                   | 0.40245 |

| Well / Cycle        | Raw fluorescence data |          |          |          | Well / Cycle | E6 Normalized Fluorescence | E7 Normalized Fluorescence | E8 Normalized Fluorescence | E9 Normalized Fluorescence |
|---------------------|-----------------------|----------|----------|----------|--------------|----------------------------|----------------------------|----------------------------|----------------------------|
|                     | 6 sample              | 7 sample | 8 sample | 9 sample |              |                            |                            |                            |                            |
| 0.56                | 394.85                | 409.2    | 375.4    | 376.17   | 0.56         | -0.0023326                 | -0.0016851                 | -0.0201685                 | -0.0017276                 |
| 1.56                | 392.24                | 409.56   | 379.97   | 376.95   | 1.56         | -0.0089273                 | -0.0008068                 | -0.0082403                 | 0.0003423                  |
| 2.56                | 384.84                | 405.72   | 376.93   | 373.42   | 2.56         | -0.0276249                 | -0.0101752                 | -0.0161751                 | -0.0090255                 |
| 3.56                | 394.26                | 410.96   | 375.71   | 375.77   | 3.56         | -0.0038234                 | 0.0026087                  | -0.0193594                 | -0.0027891                 |
| 4.56                | 391.53                | 406.61   | 376.42   | 374.49   | 4.56         | -0.0107213                 | -0.0080038                 | -0.0175062                 | -0.0061860                 |
| 5.56                | 393.53                | 408.56   | 383.32   | 375.1    | 5.56         | -0.0056679                 | -0.0032465                 | 0.0005035                  | -0.0045672                 |
| 6.56                | 399.01                | 409.25   | 384.46   | 380.86   | 6.56         | 0.0081784                  | -0.0015631                 | 0.0034790                  | 0.0107186                  |
| 7.56                | 392.81                | 409.73   | 383.29   | 376.29   | 7.56         | -0.0074871                 | -0.0003921                 | 0.0004252                  | -0.0014092                 |
| 8.56                | 402.4                 | 414.28   | 385.49   | 382.76   | 8.56         | 0.0167439                  | 0.0107085                  | 0.0061674                  | 0.0157608                  |
| 9.56                | 396.83                | 410.76   | 385.78   | 378.23   | 9.56         | 0.0026702                  | 0.0021208                  | 0.0069243                  | 0.0037392                  |
| 10.56               | 404.65                | 413.16   | 387.79   | 380.73   | 10.56        | 0.0224290                  | 0.0079760                  | 0.0121706                  | 0.0103736                  |
| 11.56               | 396.56                | 412.01   | 386.87   | 380.58   | 11.56        | 0.0019880                  | 0.0051704                  | 0.0097693                  | 0.0099756                  |
| 12.56               | 405.12                | 417.17   | 391.43   | 382.46   | 12.56        | 0.0236166                  | 0.0177591                  | 0.0216714                  | 0.0149647                  |
| 13.56               | 404.09                | 413.35   | 391.71   | 380.12   | 13.56        | 0.0210141                  | 0.0084396                  | 0.0224022                  | 0.0087548                  |
| 14.56               | 401.74                | 416.61   | 390.74   | 382.65   | 14.56        | 0.0150763                  | 0.0163929                  | 0.0198704                  | 0.0154689                  |
| 15.56               | 403.55                | 416.3    | 390.43   | 381.14   | 15.56        | 0.0196496                  | 0.0156366                  | 0.0190613                  | 0.0114617                  |
| 16.58               | 403.58                | 418.62   | 387.89   | 378.68   | 16.58        | 0.0197254                  | 0.0212967                  | 0.0124316                  | 0.0049334                  |
| 17.58               | 403.59                | 416.36   | 388.31   | 382.52   | 17.58        | 0.0197507                  | 0.0157830                  | 0.0135279                  | 0.0151239                  |
| 18.58               | 396.28                | 418.73   | 393.02   | 379.86   | 18.58        | 0.0012805                  | 0.0215650                  | 0.0258215                  | 0.0080648                  |
| 19.58               | 401.66                | 418.52   | 394.09   | 382.94   | 19.58        | 0.0148742                  | 0.0210527                  | 0.0286143                  | 0.0162385                  |
| 20.58               | 406.42                | 417.95   | 391.55   | 383.4    | 20.58        | 0.0269013                  | 0.0196621                  | 0.0219846                  | 0.0174592                  |
| 21.58               | 397.96                | 409.54   | 389.9    | 374.81   | 21.58        | 0.0055254                  | -0.0008556                 | 0.0176779                  | -0.0053368                 |
| 22.58               | 405.3                 | 414.74   | 393.1    | 382.91   | 22.58        | 0.0240714                  | 0.0118307                  | 0.0260303                  | 0.0161589                  |
| 23.58               | 409.23                | 421.6    | 397.46   | 383.75   | 23.58        | 0.0340013                  | 0.0285669                  | 0.0374103                  | 0.0183880                  |
| 24.58               | 409.21                | 421.19   | 402.1    | 385.86   | 24.58        | 0.0339508                  | 0.0275666                  | 0.0495212                  | 0.0239875                  |
| 25.58               | 420.41                | 433.45   | 408      | 396.37   | 25.58        | 0.0622498                  | 0.0574770                  | 0.0649208                  | 0.0518787                  |
| 26.58               | 423.56                | 436.86   | 417.45   | 400.42   | 26.58        | 0.0702089                  | 0.0657963                  | 0.0895862                  | 0.0626266                  |
| 27.58               | 455.26                | 463.84   | 435.09   | 419.53   | 27.58        | 0.1503053                  | 0.1316187                  | 0.1356284                  | 0.1133403                  |
| 28.56               | 459.3                 | 477.01   | 445.11   | 427.68   | 28.56        | 0.1605131                  | 0.1637493                  | 0.1617816                  | 0.1349686                  |
| 29.61               | 491.88                | 509.61   | 475.86   | 456.13   | 29.61        | 0.2428330                  | 0.2432827                  | 0.2420421                  | 0.2104686                  |
| 30.56               | 525.51                | 534.4    | 501.95   | 480.82   | 30.56        | 0.3278059                  | 0.3037622                  | 0.3101396                  | 0.2759905                  |
| 31.63               | 551.07                | 563.38   | 521.44   | 504.44   | 31.63        | 0.3923884                  | 0.3744640                  | 0.3610105                  | 0.3386727                  |
| 32.63               | 589.34                | 606.78   | 558.85   | 532.65   | 32.63        | 0.4890852                  | 0.4803459                  | 0.4586543                  | 0.4135359                  |
| 33.63               | 612.12                | 624.35   | 570.47   | 545.85   | 33.63        | 0.5466434                  | 0.5232109                  | 0.4889837                  | 0.4485658                  |
| 34.63               | 646.47                | 666.93   | 601.42   | 576.64   | 34.63        | 0.6334355                  | 0.6270923                  | 0.5697663                  | 0.5302756                  |
| 35.63               | 667.2                 | 688.23   | 626.06   | 591.62   | 35.63        | 0.6858140                  | 0.6790574                  | 0.6340791                  | 0.5700293                  |
| 36.63               | 715.74                | 728.44   | 664.4    | 620.42   | 36.63        | 0.8084600                  | 0.7771567                  | 0.7341504                  | 0.6464581                  |
| 37.65               | 744.83                | 766.9    | 686.26   | 651.1    | 37.65        | 0.8819617                  | 0.8709866                  | 0.7912071                  | 0.7278761                  |
| 38.65               | 778.65                | 804.62   | 714.31   | 678.68   | 38.65        | 0.9674147                  | 0.9630111                  | 0.8644204                  | 0.8010674                  |
| 39.65               | 805.21                | 831.22   | 738.24   | 694.3    | 39.65        | 1.0345238                  | 1.0279065                  | 0.9268801                  | 0.8425194                  |
| Parameter           |                       |          |          |          | Parameter    | Value                      |                            |                            |                            |
| a                   | 480.36                | 498.845  | 424.22   | 364.78   | a            | 1.2137                     | 1.217                      | 1.1073                     | 0.968                      |
| b                   | 3.2837                | 3.2775   | 3.4758   | 3.2111   | b            | 3.2837                     | 3.2775                     | 3.4758                     | 3.2111                     |
| x0                  | 34.2861               | 34.4796  | 34.292   | 33.99    | x0           | 34.2861                    | 34.4796                    | 34.2918                    | 33.9898                    |
| y0                  | 395.773               | 409.891  | 383.13   | 376.82   | y0           | 0                          | 0                          | 0                          | 0                          |
| R                   | 0.9984                | 0.9986   | 0.9986   | 0.9982   | R            | 0.99840242                 | 0.99859654                 | 0.99861586                 | 0.9981963                  |
| CP <sub>(SDM)</sub> | 29.96                 | 30.16    | 29.71    | 29.76    |              |                            |                            |                            |                            |

| Well /<br>Cycle           | Raw fluorescence data |          |          |          | Well /<br>Cycle | E6 Normalized | E7 Normalized | E8 Normalized | E9 Normalized |
|---------------------------|-----------------------|----------|----------|----------|-----------------|---------------|---------------|---------------|---------------|
|                           | E6                    | E7       | E8       | E9       |                 | Fluorescence  | Fluorescence  | Fluorescence  | Fluorescence  |
| 0.56                      | 146.72                | 145      | 150.84   | 127.36   | 0.56            | -0.0072575    | -0.0121889    | -0.0163331    | -0.0137965    |
| 1.56                      | 146.1                 | 143.69   | 151.51   | 126.85   | 1.56            | -0.0114525    | -0.0211133    | -0.0119639    | -0.0177456    |
| 2.56                      | 146.3                 | 147.19   | 151.21   | 129.01   | 2.56            | -0.0100993    | 0.0027304     | -0.0139203    | -0.0010198    |
| 3.56                      | 147.51                | 148.94   | 151.4    | 129.07   | 3.56            | -0.0019121    | 0.0146523     | -0.0126812    | -0.0005552    |
| 4.56                      | 149.05                | 147.01   | 154.94   | 128.46   | 4.56            | 0.0085079     | 0.0015042     | 0.0104040     | -0.0052787    |
| 5.56                      | 147.95                | 147.55   | 152.08   | 129.85   | 5.56            | 0.0010650     | 0.0051829     | -0.0082468    | 0.0054847     |
| 6.56                      | 148.78                | 148.6    | 151.71   | 130.32   | 6.56            | 0.0066810     | 0.0123361     | -0.0106597    | 0.0091241     |
| 7.56                      | 150.76                | 148.83   | 157.34   | 130.79   | 7.56            | 0.0200781     | 0.0139029     | 0.0260550     | 0.0127635     |
| 8.56                      | 149.1                 | 148.55   | 158.34   | 131.18   | 8.56            | 0.0088462     | 0.0119954     | 0.0325763     | 0.0157834     |
| 9.56                      | 149.82                | 150.13   | 155.59   | 132.1    | 9.56            | 0.0137179     | 0.0227592     | 0.0146428     | 0.0229074     |
| 10.56                     | 149.03                | 149.97   | 155.51   | 131.63   | 10.56           | 0.0083725     | 0.0216692     | 0.0141211     | 0.0192680     |
| 11.56                     | 148.61                | 150.46   | 156.82   | 132.53   | 11.56           | 0.0055307     | 0.0250073     | 0.0226640     | 0.0262371     |
| 12.56                     | 149.92                | 150.14   | 157.82   | 130.77   | 12.56           | 0.0143945     | 0.0228273     | 0.0291852     | 0.0126086     |
| 13.56                     | 149.05                | 150.7    | 156.52   | 132.75   | 13.56           | 0.0085079     | 0.0266423     | 0.0207076     | 0.0279406     |
| 14.56                     | 150.73                | 149.85   | 160.85   | 131.82   | 14.56           | 0.0198751     | 0.0208517     | 0.0489447     | 0.0207392     |
| 15.56                     | 154.48                | 151.55   | 157.65   | 133.31   | 15.56           | 0.0452485     | 0.0324329     | 0.0280766     | 0.0322769     |
| 16.58                     | 152.11                | 150.31   | 155.82   | 130.75   | 16.58           | 0.0292126     | 0.0239854     | 0.0161427     | 0.0124538     |
| 17.58                     | 153.98                | 150.1    | 155.7    | 131.81   | 17.58           | 0.0418654     | 0.0225548     | 0.0153602     | 0.0206618     |
| 18.58                     | 151.82                | 149.22   | 158.07   | 133.33   | 18.58           | 0.0272503     | 0.0165598     | 0.0308156     | 0.0324318     |
| 19.58                     | 154.45                | 151.48   | 161.27   | 132.8    | 19.58           | 0.0450456     | 0.0319560     | 0.0516836     | 0.0283278     |
| 20.58                     | 154.82                | 151.3    | 160.65   | 135.39   | 20.58           | 0.0475491     | 0.0307298     | 0.0476404     | 0.0483833     |
| 21.58                     | 156.53                | 155.54   | 163.25   | 135.06   | 21.58           | 0.0591193     | 0.0596147     | 0.0645957     | 0.0458280     |
| 22.58                     | 157.62                | 155.52   | 164.91   | 136.96   | 22.58           | 0.0664945     | 0.0594785     | 0.0754210     | 0.0605405     |
| 23.58                     | 156.91                | 159.3    | 166.98   | 138.83   | 23.58           | 0.0616905     | 0.0852297     | 0.0889200     | 0.0750207     |
| 24.58                     | 165.44                | 163.24   | 172.48   | 142.91   | 24.58           | 0.1194065     | 0.1120709     | 0.1247869     | 0.1066139     |
| 25.58                     | 170.87                | 171.28   | 182.96   | 147.4    | 25.58           | 0.1561472     | 0.1668433     | 0.1931297     | 0.1413819     |
| 26.58                     | 189.03                | 187.3    | 198.93   | 162.14   | 26.58           | 0.2790221     | 0.2759794     | 0.2972742     | 0.2555201     |
| 27.58                     | 205.36                | 206.39   | 219.38   | 173.98   | 27.58           | 0.3895148     | 0.4060299     | 0.4306340     | 0.3472023     |
| 28.56                     | 235.2                 | 232.9    | 254.18   | 200.98   | 28.56           | 0.5914193     | 0.5866290     | 0.6575739     | 0.5562750     |
| 29.61                     | 270.01                | 272.33   | 286.47   | 224.42   | 29.61           | 0.8269521     | 0.8552455     | 0.8681453     | 0.7377811     |
| 30.56                     | 304.84                | 310.53   | 323.42   | 248.97   | 30.56           | 1.0626202     | 1.1154826     | 1.1091059     | 0.9278823     |
| 31.63                     | 344.9                 | 350.98   | 364.44   | 273.85   | 31.63           | 1.3336757     | 1.3910478     | 1.3766080     | 1.1205389     |
| 32.63                     | 382.4                 | 380.36   | 398.7    | 295.14   | 32.63           | 1.5874097     | 1.5911988     | 1.6000263     | 1.2853966     |
| 33.63                     | 420.5                 | 422.86   | 437.16   | 325.68   | 33.63           | 1.8452033     | 1.8807296     | 1.8508340     | 1.5218810     |
| 34.63                     | 450.23                | 452.5    | 471.02   | 350.55   | 34.63           | 2.0463636     | 2.0826519     | 2.0716439     | 1.7144602     |
| 35.63                     | 485.23                | 488.55   | 506.31   | 374.64   | 35.63           | 2.2831820     | 2.3282421     | 2.3017791     | 1.9009994     |
| 36.63                     | 513.29                | 516.95   | 536.1    | 396.85   | 36.63           | 2.4730426     | 2.5217169     | 2.4960475     | 2.0729811     |
| 37.65                     | 537.16                | 545.49   | 559.92   | 413.03   | 37.65           | 2.6345527     | 2.7161453     | 2.6513839     | 2.1982698     |
| 38.65                     | 567.19                | 576.75   | 588.88   | 430.92   | 38.65           | 2.8377429     | 2.9291038     | 2.8402396     | 2.3367998     |
| 39.65                     | 592.72                | 594.68   | 614.28   | 455.16   | 39.65           | 3.0104850     | 3.0512517     | 3.0058796     | 2.5245006     |
| <b>Parameter</b>          |                       |          |          |          |                 |               |               |               |               |
| a                         | 468.09                | 475.9454 | 488.3224 | 346.2049 |                 |               |               |               |               |
| b                         | 2.8256                | 2.8348   | 2.9079   | 2.9742   |                 |               |               |               |               |
| x0                        | 32.739                | 32.7456  | 32.6515  | 32.8062  |                 |               |               |               |               |
| y0                        | 147.79                | 146.7892 | 153.3446 | 129.1417 |                 |               |               |               |               |
| R                         | 0.9993                | 0.999216 | 0.999324 | 0.999138 |                 |               |               |               |               |
| <b>CP<sub>(SDM)</sub></b> | 29.02                 | 29.01    | 28.82    | 28.89    |                 |               |               |               |               |

| E6              |                                |                                | E7              |                                |                                | E8              |                                |
|-----------------|--------------------------------|--------------------------------|-----------------|--------------------------------|--------------------------------|-----------------|--------------------------------|
| Well /<br>Cycle | FAM Normalized<br>Fluorescence | VIC Normalized<br>Fluorescence | Well /<br>Cycle | FAM Normalized<br>Fluorescence | VIC Normalized<br>Fluorescence | Well /<br>Cycle | FAM Normalized<br>Fluorescence |
| 0.56            | -0.0023326                     | -0.007257468                   | 0.56            | -0.001685083                   | -0.012188908                   | 0.56            | -0.0201685                     |
| 1.56            | -0.0089273                     | -0.011452536                   | 1.56            | -0.0008068                     | -0.02111327                    | 1.56            | -0.0082403                     |
| 2.56            | -0.0276249                     | -0.010099288                   | 2.56            | -0.010175152                   | 0.002730446                    | 2.56            | -0.0161751                     |
| 3.56            | -0.0038234                     | -0.001912139                   | 3.56            | 0.002608744                    | 0.014652304                    | 3.56            | -0.0193594                     |
| 4.56            | -0.0107213                     | 0.008507868                    | 4.56            | -0.008003841                   | 0.001504198                    | 4.56            | -0.0175062                     |
| 5.56            | -0.0056679                     | 0.001065006                    | 5.56            | -0.003246475                   | 0.005182943                    | 5.56            | 0.0005035                      |
| 6.56            | 0.0081784                      | 0.006680984                    | 6.56            | -0.0015631                     | 0.012336057                    | 6.56            | 0.0034790                      |
| 7.56            | -0.0074871                     | 0.020078137                    | 7.56            | -0.000392056                   | 0.01390293                     | 7.56            | 0.0004252                      |
| 8.56            | 0.0167439                      | 0.00884618                     | 8.56            | 0.010708464                    | 0.011995433                    | 8.56            | 0.0061674                      |
| 9.56            | 0.0026702                      | 0.013717872                    | 9.56            | 0.002120809                    | 0.022759168                    | 9.56            | 0.0069243                      |
| 10.56           | 0.0224290                      | 0.008372544                    | 10.56           | 0.007976029                    | 0.021669169                    | 10.56           | 0.0121706                      |
| 11.56           | 0.0019880                      | 0.005530723                    | 11.56           | 0.005170403                    | 0.025007289                    | 11.56           | 0.0097693                      |
| 12.56           | 0.0236166                      | 0.014394496                    | 12.56           | 0.017759125                    | 0.022827292                    | 12.56           | 0.0216714                      |
| 13.56           | 0.0210141                      | 0.008507868                    | 13.56           | 0.008439567                    | 0.026642287                    | 13.56           | 0.0224022                      |
| 14.56           | 0.0150763                      | 0.019875149                    | 14.56           | 0.016392907                    | 0.02085167                     | 14.56           | 0.0198704                      |
| 15.56           | 0.0196496                      | 0.045248544                    | 15.56           | 0.015636608                    | 0.032432904                    | 15.56           | 0.0190613                      |
| 16.58           | 0.0197254                      | 0.029212559                    | 16.58           | 0.021296653                    | 0.023985416                    | 16.58           | 0.0124316                      |
| 17.58           | 0.0197507                      | 0.041865425                    | 17.58           | 0.015782988                    | 0.022554793                    | 17.58           | 0.0135279                      |
| 18.58           | 0.0012805                      | 0.027250349                    | 18.58           | 0.021565017                    | 0.016559801                    | 18.58           | 0.0258215                      |
| 19.58           | 0.0148742                      | 0.045045557                    | 19.58           | 0.021052686                    | 0.031956029                    | 19.58           | 0.0286143                      |
| 20.58           | 0.0269013                      | 0.047549065                    | 20.58           | 0.019662071                    | 0.030729781                    | 20.58           | 0.0219846                      |
| 21.58           | 0.0055254                      | 0.059119333                    | 21.58           | -0.000855594                   | 0.05961474                     | 21.58           | 0.0176779                      |
| 22.58           | 0.0240714                      | 0.066494534                    | 22.58           | 0.011830715                    | 0.05947849                     | 22.58           | 0.0260303                      |
| 23.58           | 0.0340013                      | 0.061690504                    | 23.58           | 0.028566884                    | 0.085229704                    | 23.58           | 0.0374103                      |
| 24.58           | 0.0339508                      | 0.11940652                     | 24.58           | 0.027566617                    | 0.112070915                    | 24.58           | 0.0495212                      |
| 25.58           | 0.0622498                      | 0.156147195                    | 25.58           | 0.05747703                     | 0.166843337                    | 25.58           | 0.0649208                      |
| 26.58           | 0.0702089                      | 0.279022089                    | 26.58           | 0.065796321                    | 0.275979432                    | 26.58           | 0.0895862                      |
| 27.58           | 0.1503053                      | 0.389514766                    | 27.58           | 0.131618746                    | 0.406029871                    | 27.58           | 0.1356284                      |
| 28.56           | 0.1605131                      | 0.591419327                    | 28.56           | 0.163749263                    | 0.586628989                    | 28.56           | 0.1617816                      |
| 29.61           | 0.2428330                      | 0.826952094                    | 29.61           | 0.24328266                     | 0.855245481                    | 29.61           | 0.2420421                      |
| 30.56           | 0.3278059                      | 1.062620185                    | 30.56           | 0.303762198                    | 1.11548261                     | 30.56           | 0.3101396                      |
| 31.63           | 0.3923884                      | 1.333675705                    | 31.63           | 0.374463973                    | 1.391047843                    | 31.63           | 0.3610105                      |
| 32.63           | 0.4890852                      | 1.587409654                    | 32.63           | 0.480345858                    | 1.591198808                    | 32.63           | 0.4586543                      |
| 33.63           | 0.5466434                      | 1.845203346                    | 33.63           | 0.523210944                    | 1.880729645                    | 33.63           | 0.4889837                      |
| 34.63           | 0.6334355                      | 2.04636362                     | 34.63           | 0.627092296                    | 2.082651857                    | 34.63           | 0.5697663                      |
| 35.63           | 0.6858140                      | 2.283181973                    | 35.63           | 0.679057368                    | 2.328242132                    | 35.63           | 0.6340791                      |
| 36.63           | 0.8084600                      | 2.473042629                    | 36.63           | 0.777156691                    | 2.521716857                    | 36.63           | 0.7341504                      |
| 37.65           | 0.8819617                      | 2.634552745                    | 37.65           | 0.870986583                    | 2.716145329                    | 37.65           | 0.7912071                      |
| 38.65           | 0.9674147                      | 2.837742891                    | 38.65           | 0.963011115                    | 2.929103776                    | 38.65           | 0.8644204                      |
| 39.65           | 1.0345238                      | 3.010484963                    | 39.65           | 1.027906464                    | 3.051251727                    | 39.65           | 0.9268801                      |

  

| Linear regression derived parameters |           | Linear regression derived parameters |            | Linear regression derived parameters |            |
|--------------------------------------|-----------|--------------------------------------|------------|--------------------------------------|------------|
| parameter                            | value     | parameter                            | value      | parameter                            | value      |
| y0                                   | -0.0009   | y0                                   | -0.0049    | y0                                   | 0.0039     |
| a                                    | 0.303     | a                                    | 0.2889     | a                                    | 0.2731     |
| R                                    | 0.9928678 | R                                    | 0.99289059 | R                                    | 0.99350397 |

**E9**

| VIC Normalized Fluorescence | Well / Cycle | FAM Normalized Fluorescence | VIC Normalized Fluorescence |
|-----------------------------|--------------|-----------------------------|-----------------------------|
| -0.016333148                | 0.56         | -0.001727611                | -0.013796473                |
| -0.011963904                | 1.56         | 0.000342338                 | -0.017745624                |
| -0.013920282                | 2.56         | -0.009025505                | -0.00101981                 |
| -0.012681242                | 3.56         | -0.002789123                | -0.000555204                |
| 0.010404018                 | 4.56         | -0.006185961                | -0.005278698                |
| -0.008246785                | 5.56         | -0.004567155                | 0.005484673                 |
| -0.010659652                | 6.56         | 0.010718617                 | 0.009124086                 |
| 0.026055042                 | 7.56         | -0.001409157                | 0.012763499                 |
| 0.032576302                 | 8.56         | 0.015760799                 | 0.015783438                 |
| 0.014642837                 | 9.56         | 0.003739176                 | 0.022907396                 |
| 0.014121136                 | 10.56        | 0.010373626                 | 0.019267982                 |
| 0.022663987                 | 11.56        | 0.009975559                 | 0.026237071                 |
| 0.029185247                 | 12.56        | 0.014964665                 | 0.012608631                 |
| 0.020707609                 | 13.56        | 0.00875482                  | 0.027940626                 |
| 0.048944665                 | 14.56        | 0.015468883                 | 0.020739234                 |
| 0.028076633                 | 15.56        | 0.011461675                 | 0.032276948                 |
| 0.016142727                 | 16.58        | 0.004933377                 | 0.012453762                 |
| 0.015360176                 | 17.58        | 0.015123892                 | 0.0206618                   |
| 0.030815562                 | 18.58        | 0.008064837                 | 0.032431817                 |
| 0.051683594                 | 19.58        | 0.016238479                 | 0.028327798                 |
| 0.047640413                 | 20.58        | 0.017459218                 | 0.048383288                 |
| 0.064595688                 | 21.58        | -0.005336751                | 0.045827955                 |
| 0.07542098                  | 22.58        | 0.016158866                 | 0.060540476                 |
| 0.088919988                 | 23.58        | 0.018388041                 | 0.075020694                 |
| 0.124786918                 | 24.58        | 0.023987517                 | 0.106613898                 |
| 0.193129722                 | 25.58        | 0.051878743                 | 0.141381908                 |
| 0.297274244                 | 26.58        | 0.062626552                 | 0.255520099                 |
| 0.43063401                  | 27.58        | 0.113340286                 | 0.347202337                 |
| 0.657573857                 | 28.56        | 0.134968593                 | 0.556275006                 |
| 0.868145341                 | 29.61        | 0.210468631                 | 0.737781058                 |
| 1.109105896                 | 30.56        | 0.275990457                 | 0.927882318                 |
| 1.37660798                  | 31.63        | 0.338672739                 | 1.120538912                 |
| 1.600026346                 | 32.63        | 0.41353587                  | 1.285396584                 |
| 1.850834004                 | 33.63        | 0.448565765                 | 1.521881004                 |
| 2.071643866                 | 34.63        | 0.530275648                 | 1.714460163                 |
| 2.30177913                  | 35.63        | 0.570029271                 | 1.900999445                 |
| 2.496047464                 | 36.63        | 0.646458133                 | 2.072981074                 |
| 2.651383877                 | 37.65        | 0.7278761                   | 2.198269808                 |
| 2.840239565                 | 38.65        | 0.80106735                  | 2.33679981                  |
| 3.005879568                 | 39.65        | 0.842519392                 | 2.524500607                 |

| Experiment derived linear regression |            |
|--------------------------------------|------------|
| parameter                            | value      |
| y0                                   | -0.0235    |
| a                                    | 0.3277     |
| R                                    | 0.99252131 |

**AVERAGE**

| Experiment derived linear regression |          |
|--------------------------------------|----------|
| parameter                            | value    |
| y0                                   | -0.00635 |
| a                                    | 0.298175 |
| R                                    |          |

| Well /<br>Cycle | Raw fluorescence data |        |        |        | Well /<br>Cycle | F2 Normalized | F3 Normalized | F4 Normalized | F5 Normalized |
|-----------------|-----------------------|--------|--------|--------|-----------------|---------------|---------------|---------------|---------------|
|                 | F2                    | F3     | F4     | F5     |                 | Fluorescence  | Fluorescence  | Fluorescence  | Fluorescence  |
| 0.56            | 340.41                | 337.67 | 344.77 | 362.54 | 0.56            | -0.0230094    | -0.0103853    | -0.0335254    | -0.0456598    |
| 1.56            | 343.44                | 338.53 | 353.31 | 368.33 | 1.56            | -0.0143132    | -0.0078649    | -0.0095857    | -0.0304184    |
| 2.56            | 338.41                | 338.34 | 349.59 | 369.29 | 2.56            | -0.0287495    | -0.0084217    | -0.0200138    | -0.0278913    |
| 3.56            | 346.15                | 340.59 | 355.94 | 373.92 | 3.56            | -0.0065354    | -0.0018276    | -0.0022132    | -0.0157034    |
| 4.56            | 345.96                | 339.96 | 352.16 | 372.31 | 4.56            | -0.0070807    | -0.0036739    | -0.0128094    | -0.0199415    |
| 5.56            | 344.24                | 335.64 | 351.75 | 375.63 | 5.56            | -0.0120171    | -0.0163346    | -0.0139588    | -0.0112021    |
| 6.56            | 350.48                | 348.05 | 360.54 | 379.8  | 6.56            | 0.0058919     | 0.0200355     | 0.0106818     | -0.0002251    |
| 7.56            | 347.62                | 344    | 355.41 | 379.19 | 7.56            | -0.0023164    | 0.0081661     | -0.0036989    | -0.0018308    |
| 8.56            | 351.32                | 346.75 | 358.93 | 385.57 | 8.56            | 0.0083027     | 0.0162256     | 0.0061685     | 0.0149637     |
| 9.56            | 346.6                 | 337.08 | 356.35 | 382.59 | 9.56            | -0.0052439    | -0.0121144    | -0.0010638    | 0.0071193     |
| 10.56           | 352.07                | 340.47 | 360.02 | 388.31 | 10.56           | 0.0104553     | -0.0021793    | 0.0092241     | 0.0221764     |
| 11.56           | 351.39                | 339.84 | 359.09 | 383.77 | 11.56           | 0.0085036     | -0.0040256    | 0.0066171     | 0.0102254     |
| 12.56           | 354.62                | 346.04 | 362.8  | 390.09 | 12.56           | 0.0177739     | 0.0141448     | 0.0170171     | 0.0268620     |
| 13.56           | 355.12                | 345.39 | 360.93 | 388.58 | 13.56           | 0.0192089     | 0.0122398     | 0.0117750     | 0.0228872     |
| 14.56           | 354.51                | 345.81 | 366.99 | 396.21 | 14.56           | 0.0174582     | 0.0134707     | 0.0287627     | 0.0429722     |
| 15.56           | 356.87                | 345.34 | 363.9  | 390.31 | 15.56           | 0.0242315     | 0.0120933     | 0.0201007     | 0.0274412     |
| 16.58           | 357.94                | 349.46 | 367.33 | 392.69 | 16.58           | 0.0273024     | 0.0241679     | 0.0297158     | 0.0337062     |
| 17.58           | 358.89                | 344.35 | 362.55 | 394.6  | 17.58           | 0.0300290     | 0.0091919     | 0.0163163     | 0.0387340     |
| 18.58           | 359.84                | 343.54 | 366.39 | 396.88 | 18.58           | 0.0327555     | 0.0068180     | 0.0270807     | 0.0447358     |
| 19.58           | 356.34                | 348.49 | 367.92 | 397.48 | 19.58           | 0.0227103     | 0.0213251     | 0.0313697     | 0.0463153     |
| 20.58           | 357.76                | 348.99 | 364.81 | 397.71 | 20.58           | 0.0267858     | 0.0227904     | 0.0226516     | 0.0469207     |
| 21.58           | 352.02                | 343.48 | 363.61 | 391.73 | 21.58           | 0.0103118     | 0.0066422     | 0.0192877     | 0.0311791     |
| 22.58           | 356.82                | 345.45 | 361.99 | 396.95 | 22.58           | 0.0240880     | 0.0124157     | 0.0147465     | 0.0449201     |
| 23.58           | 365.29                | 352.36 | 371.49 | 403.28 | 23.58           | 0.0483972     | 0.0326669     | 0.0413773     | 0.0615830     |
| 24.58           | 360.71                | 345.28 | 368.93 | 402.62 | 24.58           | 0.0352524     | 0.0119175     | 0.0342010     | 0.0598457     |
| 25.58           | 371.74                | 354.23 | 377.96 | 411.8  | 25.58           | 0.0669090     | 0.0381474     | 0.0595143     | 0.0840108     |
| 26.58           | 376.73                | 362.48 | 383.11 | 416.5  | 26.58           | 0.0812305     | 0.0623258     | 0.0739510     | 0.0963830     |
| 27.58           | 398.16                | 375.18 | 398.65 | 435.86 | 27.58           | 0.1427355     | 0.0995459     | 0.1175134     | 0.1473457     |
| 28.56           | 401.46                | 376.53 | 408.99 | 433.2  | 28.56           | 0.1522066     | 0.1035023     | 0.1464990     | 0.1403436     |
| 29.61           | 424.16                | 403.08 | 426.31 | 458.06 | 29.61           | 0.2173565     | 0.1813128     | 0.1950512     | 0.2057844     |
| 30.56           | 447.57                | 418.32 | 448.27 | 470.17 | 30.56           | 0.2845442     | 0.2259769     | 0.2566104     | 0.2376624     |
| 31.63           | 464.76                | 437.5  | 466.42 | 484.87 | 31.63           | 0.3338802     | 0.2821880     | 0.3074893     | 0.2763583     |
| 32.63           | 481.92                | 460.01 | 491.55 | 516.18 | 32.63           | 0.3831301     | 0.3481585     | 0.3779348     | 0.3587778     |
| 33.63           | 500.01                | 475.63 | 506.79 | 528.89 | 33.63           | 0.4350491     | 0.3939362     | 0.4206563     | 0.3922353     |
| 34.63           | 528.72                | 499.49 | 534.08 | 556.26 | 34.63           | 0.5174480     | 0.4638631     | 0.4971568     | 0.4642833     |
| 35.63           | 545.64                | 513.53 | 551.25 | 567.35 | 35.63           | 0.5660091     | 0.5050104     | 0.5452885     | 0.4934763     |
| 36.63           | 573.95                | 544.14 | 584.62 | 600.25 | 36.63           | 0.6472599     | 0.5947196     | 0.6388328     | 0.5800814     |
| 37.65           | 596.66                | 562.83 | 610.34 | 618.26 | 37.65           | 0.7124386     | 0.6494946     | 0.7109322     | 0.6274904     |
| 38.65           | 616.88                | 590.26 | 638.88 | 646.23 | 38.65           | 0.7704708     | 0.7298842     | 0.7909368     | 0.7011178     |
| 39.65           | 634.4                 | 607.24 | 654.42 | 665.2  | 39.65           | 0.8207539     | 0.7796477     | 0.8344992     | 0.7510539     |
| Parameter       |                       |        |        |        | Parameter Value |               |               |               |               |
| a               | 352.93                | 322.45 | 387.05 | 438.62 | a               | 1.0129        | 0.95          | 1.09          | 1.154600      |
| b               | 3.64                  | 3.34   | 3.67   | 4.60   | b               | 3.6415        | 3.34          | 3.67          | 4.595400      |
| x0              | 34.50                 | 34.77  | 35.24  | 36.72  | x0              | 34.4997       | 34.77         | 35.24         | 36.724100     |
| y0              | 348.43                | 341.21 | 356.73 | 379.89 | y0              | 0.0000        | 0.00          | 0.00          | 0.000000      |
| R               | 1.00                  | 1.00   | 1.00   | 1.00   | R               | 0.998273      | 0.998195      | 0.998352      | 0.996759      |

CP<sub>(SDM)</sub> 29.70 30.37 30.41 30.67

| Well / Cycle | Raw fluorescence data |        |        |        | Well / Fluorescence | F2 Normalized | F3 Normalized | F4 Normalized | E5 Normalized | E5 Fluorescence |
|--------------|-----------------------|--------|--------|--------|---------------------|---------------|---------------|---------------|---------------|-----------------|
|              | F2                    | F3     | F4     | F5     |                     |               | predicted     | predicted     | predicted     |                 |
| 0.6          | 113.11                | 116.15 | 120.16 | 117.41 | 0.56                | -0.0200495    | -0.0026208    | -0.0301622    | -0.0249691    | 0.0001191       |
| 1.6          | 114.02                | 117.12 | 123.22 | 118.22 | 1.56                | -0.0121656    | 0.0057086     | -0.0054642    | -0.0182425    | 0.0001627       |
| 2.6          | 115.77                | 116.34 | 124.58 | 118.82 | 2.56                | 0.0029959     | -0.0009892    | 0.0055126     | -0.0132598    | 0.0002224       |
| 3.6          | 115.18                | 115.37 | 122.76 | 118.64 | 3.56                | -0.0021157    | -0.0093186    | -0.0091770    | -0.0147546    | 0.0003040       |
| 4.6          | 114.86                | 116.83 | 124.54 | 120.17 | 4.56                | -0.0048881    | 0.0032184     | 0.0051898     | -0.0020487    | 0.0004157       |
| 5.6          | 114.13                | 117.85 | 125.38 | 120.72 | 5.56                | -0.0112126    | 0.0119771     | 0.0119696     | 0.0025188     | 0.0005683       |
| 6.6          | 116.03                | 117.54 | 124.77 | 121.3  | 6.56                | 0.0052485     | 0.0093152     | 0.0070462     | 0.0073354     | 0.0007771       |
| 7.6          | 116.53                | 117.87 | 126.05 | 120.95 | 7.56                | 0.0095803     | 0.0121489     | 0.0173773     | 0.0044288     | 0.0010625       |
| 8.6          | 116.16                | 116.29 | 124.74 | 121.5  | 8.56                | 0.0063747     | -0.0014186    | 0.0068040     | 0.0089963     | 0.0014528       |
| 9.6          | 118.75                | 118.32 | 125.69 | 121.6  | 9.56                | 0.0288137     | 0.0160130     | 0.0144717     | 0.0098267     | 0.0019863       |
| 11           | 116.49                | 119.03 | 125.82 | 121.5  | 10.56               | 0.0092338     | 0.0221098     | 0.0155210     | 0.0089963     | 0.0027158       |
| 12           | 117.2                 | 118.2  | 127.59 | 124.01 | 11.56               | 0.0153850     | 0.0149826     | 0.0298070     | 0.0298405     | 0.0037127       |
| 13           | 118.36                | 118.77 | 126.43 | 123.1  | 12.56               | 0.0254349     | 0.0198772     | 0.0204444     | 0.0222835     | 0.0050751       |
| 14           | 117.51                | 118.84 | 126.38 | 123.64 | 13.56               | 0.0180707     | 0.0204783     | 0.0200408     | 0.0267679     | 0.0069362       |
| 15           | 119.28                | 118.68 | 126.37 | 123.76 | 14.56               | 0.0334055     | 0.0191043     | 0.0199601     | 0.0277644     | 0.0094775       |
| 16           | 118.55                | 119.09 | 127.82 | 123.4  | 15.56               | 0.0270810     | 0.0226250     | 0.0316634     | 0.0247748     | 0.0129457       |
| 17           | 118.17                | 118.61 | 128.62 | 125.44 | 16.58               | 0.0237888     | 0.0185033     | 0.0381204     | 0.0417160     | 0.0177853       |
| 18           | 118.32                | 118.89 | 128.28 | 124.19 | 17.58               | 0.0250883     | 0.0209076     | 0.0353762     | 0.0313354     | 0.0242674       |
| 19           | 121.7                 | 119.28 | 129.19 | 126.66 | 18.58               | 0.0543716     | 0.0242565     | 0.0427210     | 0.0518475     | 0.0330841       |
| 20           | 121.09                | 119.11 | 127.12 | 126.73 | 19.58               | 0.0490868     | 0.0227967     | 0.0260135     | 0.0524288     | 0.0450521       |
| 21           | 121.88                | 121.74 | 129.19 | 127.24 | 20.58               | 0.0559311     | 0.0453805     | 0.0427210     | 0.0566641     | 0.0612542       |
| 22           | 123.11                | 122.16 | 129.85 | 127.79 | 21.58               | 0.0665874     | 0.0489871     | 0.0480480     | 0.0612315     | 0.0831080       |
| 23           | 126.41                | 122.31 | 132.63 | 133.25 | 22.58               | 0.0951776     | 0.0502751     | 0.0704860     | 0.1065741     | 0.1124397       |
| 24           | 127.31                | 126.75 | 133.33 | 135.27 | 23.58               | 0.1029749     | 0.0884014     | 0.0761358     | 0.1233492     | 0.1515485       |
| 25           | 132.87                | 129.6  | 140.24 | 140.96 | 24.58               | 0.1511451     | 0.1128743     | 0.1319080     | 0.1706018     | 0.2032356       |
| 26           | 138.43                | 136.12 | 144.22 | 146.91 | 25.58               | 0.1993152     | 0.1688615     | 0.1640314     | 0.2200135     | 0.2707560       |
| 27           | 152.32                | 147.04 | 159.43 | 159.79 | 26.58               | 0.3196539     | 0.2626315     | 0.2867947     | 0.3269754     | 0.3576319       |
| 28           | 167.14                | 160.5  | 176.23 | 173.96 | 27.58               | 0.4480499     | 0.3782124     | 0.4223912     | 0.4446501     | 0.4672548       |
| 29           | 195.29                | 184.53 | 202.12 | 194.53 | 28.56               | 0.6919329     | 0.5845578     | 0.6313551     | 0.6154736     | 0.5992723       |
| 30           | 224.84                | 213.3  | 235.68 | 217.13 | 29.61               | 0.9479451     | 0.8316056     | 0.9022252     | 0.8031552     | 0.7687264       |
| 31           | 253.19                | 239.62 | 265.8  | 240.3  | 30.56               | 1.1935608     | 1.0576153     | 1.1453304     | 0.9955704     | 0.9454392       |
| 32           | 281.23                | 268.75 | 296.84 | 265.78 | 31.63               | 1.4364908     | 1.3077544     | 1.3958611     | 1.2071689     | 1.1656390       |
| 33           | 306.77                | 290.84 | 324.55 | 286.44 | 32.63               | 1.6577615     | 1.4974411     | 1.6195146     | 1.3787398     | 1.3832680       |
| 34           | 334.39                | 321.78 | 357.16 | 314.08 | 33.63               | 1.8970528     | 1.7631226     | 1.8827171     | 1.6082761     | 1.6019590       |
| 35           | 357.81                | 339.91 | 383.89 | 334.13 | 34.63               | 2.0999565     | 1.9188048     | 2.0984608     | 1.7747812     | 1.8113475       |
| 36           | 383.7                 | 365.53 | 408.74 | 358.76 | 35.63               | 2.3242596     | 2.1388036     | 2.2990306     | 1.9793210     | 2.0027535       |
| 37           | 401.72                | 386.03 | 434.17 | 379.05 | 36.63               | 2.4803793     | 2.3148370     | 2.5042818     | 2.1478192     | 2.1704527       |
| 38           | 419.25                | 398.93 | 451.8  | 394.67 | 37.65               | 2.6322539     | 2.4256092     | 2.6465774     | 2.2775354     | 2.3145686       |
| 39           | 439.42                | 419.85 | 475.32 | 413.98 | 38.65               | 2.8070006     | 2.6052491     | 2.8364125     | 2.4378952     | 2.4298436       |
| 40           | 457.8                 | 436.29 | 496.01 | 430.72 | 39.65               | 2.9662393     | 2.7464192     | 3.0034061     | 2.5769125     | 2.5216728       |
| Parameter    | a                     | 356.20 | 331.22 | 387.61 | 338.44              |               |               |               |               |                 |
|              | b                     | 2.87   | 2.76   | 2.82   | 3.19                |               |               |               |               |                 |
|              | x0                    | 32.23  | 32.33  | 32.46  | 32.73               |               |               |               |               |                 |
|              | y0                    | 115.42 | 116.46 | 123.90 | 120.42              |               |               |               |               |                 |
|              | R                     | 1.00   | 1.00   | 1.00   | 1.00                |               |               |               |               |                 |
|              | P <sub>(SD)</sub>     | 28.45  | 28.68  | 28.75  | 28.52               |               |               |               |               |                 |

| F2              |                                |                                | F3              |                                |                                | F4              |                                |
|-----------------|--------------------------------|--------------------------------|-----------------|--------------------------------|--------------------------------|-----------------|--------------------------------|
| Well /<br>Cycle | FAM Normalized<br>Fluorescence | VIC Normalized<br>Fluorescence | Well /<br>Cycle | FAM Normalized<br>Fluorescence | VIC Normalized<br>Fluorescence | Well /<br>Cycle | FAM Normalized<br>Fluorescence |
| 0.56            | -0.0230094                     | -0.020049522                   | 0.56            | -0.010385284                   | -0.00262075                    | 0.56            | -0.0335254                     |
| 1.56            | -0.0143132                     | -0.01216556                    | 1.56            | -0.007864868                   | 0.005708633                    | 1.56            | -0.0095857                     |
| 2.56            | -0.0287495                     | 0.002995906                    | 2.56            | -0.008421704                   | -0.000989222                   | 2.56            | -0.0200138                     |
| 3.56            | -0.0065354                     | -0.002115674                   | 3.56            | -0.001827594                   | -0.009318605                   | 3.56            | -0.0022132                     |
| 4.56            | -0.0070807                     | -0.004888056                   | 4.56            | -0.003673945                   | 0.003218405                    | 4.56            | -0.0128094                     |
| 5.56            | -0.0120171                     | -0.011212553                   | 5.56            | -0.016334636                   | 0.011977138                    | 5.56            | -0.0139588                     |
| 6.56            | 0.0058919                      | 0.005248466                    | 6.56            | 0.020035544                    | 0.00931517                     | 6.56            | 0.0106818                      |
| 7.56            | -0.0023164                     | 0.009580313                    | 7.56            | 0.008166146                    | 0.012148878                    | 7.56            | -0.0036989                     |
| 8.56            | 0.0083027                      | 0.006374746                    | 8.56            | 0.016225614                    | -0.001418571                   | 8.56            | 0.0061685                      |
| 9.56            | -0.0052439                     | 0.028813715                    | 9.56            | -0.012114406                   | 0.016013025                    | 9.56            | -0.0010638                     |
| 10.56           | 0.0104553                      | 0.009233766                    | 10.56           | -0.00217928                    | 0.02210979                     | 10.56           | 0.0092241                      |
| 11.56           | 0.0085036                      | 0.015384989                    | 11.56           | -0.004025631                   | 0.014982586                    | 11.56           | 0.0066171                      |
| 12.56           | 0.0177739                      | 0.025434874                    | 12.56           | 0.014144805                    | 0.019877172                    | 12.56           | 0.0170171                      |
| 13.56           | 0.0192089                      | 0.018070734                    | 13.56           | 0.01223984                     | 0.020478261                    | 13.56           | 0.0117750                      |
| 14.56           | 0.0174582                      | 0.033405473                    | 14.56           | 0.013470741                    | 0.019104342                    | 14.56           | 0.0287627                      |
| 15.56           | 0.0242315                      | 0.027080976                    | 15.56           | 0.012093305                    | 0.022625009                    | 15.56           | 0.0201007                      |
| 16.58           | 0.0273024                      | 0.023788772                    | 16.58           | 0.024167853                    | 0.018503253                    | 16.58           | 0.0297158                      |
| 17.58           | 0.0300290                      | 0.025088326                    | 17.58           | 0.009191896                    | 0.020907611                    | 17.58           | 0.0163163                      |
| 18.58           | 0.0327555                      | 0.054371614                    | 18.58           | 0.006818017                    | 0.024256538                    | 18.58           | 0.0270807                      |
| 19.58           | 0.0227103                      | 0.04908676                     | 19.58           | 0.021325059                    | 0.022796749                    | 19.58           | 0.0313697                      |
| 20.58           | 0.0267858                      | 0.055931079                    | 20.58           | 0.022790416                    | 0.045380541                    | 20.58           | 0.0226516                      |
| 21.58           | 0.0103118                      | 0.066587423                    | 21.58           | 0.006642174                    | 0.048987078                    | 21.58           | 0.0192877                      |
| 22.58           | 0.0240880                      | 0.095177614                    | 22.58           | 0.012415683                    | 0.050275127                    | 22.58           | 0.0147465                      |
| 23.58           | 0.0483972                      | 0.102974939                    | 23.58           | 0.032666928                    | 0.088401377                    | 23.58           | 0.0413773                      |
| 24.58           | 0.0352524                      | 0.15114508                     | 24.58           | 0.011917462                    | 0.112874307                    | 24.58           | 0.0342010                      |
| 25.58           | 0.0669090                      | 0.199315222                    | 25.58           | 0.038147366                    | 0.168861502                    | 25.58           | 0.0595143                      |
| 26.58           | 0.0812305                      | 0.319653937                    | 26.58           | 0.062325769                    | 0.262631467                    | 26.58           | 0.0739510                      |
| 27.58           | 0.1427355                      | 0.448049889                    | 27.58           | 0.099545856                    | 0.378212394                    | 27.58           | 0.1175134                      |
| 28.56           | 0.1522066                      | 0.691932888                    | 28.56           | 0.103502322                    | 0.584557839                    | 28.56           | 0.1464990                      |
| 29.61           | 0.2173565                      | 0.947945058                    | 29.61           | 0.18131282                     | 0.83160563                     | 29.61           | 0.1950512                      |
| 30.56           | 0.2845442                      | 1.193560796                    | 30.56           | 0.225976925                    | 1.057615289                    | 30.56           | 0.2566104                      |
| 31.63           | 0.3338802                      | 1.436490788                    | 31.63           | 0.282188049                    | 1.307754398                    | 31.63           | 0.3074893                      |
| 32.63           | 0.3831301                      | 1.657761544                    | 32.63           | 0.348158456                    | 1.497441076                    | 32.63           | 0.3779348                      |
| 33.63           | 0.4350491                      | 1.897052784                    | 33.63           | 0.393936232                    | 1.763122643                    | 33.63           | 0.4206563                      |
| 34.63           | 0.5174480                      | 2.099956508                    | 34.63           | 0.463863105                    | 1.918804828                    | 34.63           | 0.4971568                      |
| 35.63           | 0.5660091                      | 2.324259557                    | 35.63           | 0.505010351                    | 2.138803591                    | 35.63           | 0.5452885                      |
| 36.63           | 0.6472599                      | 2.480379331                    | 36.63           | 0.594719554                    | 2.31483695                     | 36.63           | 0.6388328                      |
| 37.65           | 0.7124386                      | 2.632253895                    | 37.65           | 0.649494627                    | 2.425609161                    | 37.65           | 0.7109322                      |
| 38.65           | 0.7704708                      | 2.807000612                    | 38.65           | 0.729884155                    | 2.605249057                    | 38.65           | 0.7909368                      |
| 39.65           | 0.8207539                      | 2.966239315                    | 39.65           | 0.779647705                    | 2.746419224                    | 39.65           | 0.8344992                      |

| Experiment derived linear regression |            |
|--------------------------------------|------------|
| parameter                            | value      |
| y0                                   | 0.0209     |
| a                                    | 0.2168     |
| R                                    | 0.99390489 |

| Experiment derived linear regression |            |
|--------------------------------------|------------|
| parameter                            | value      |
| y0                                   | -0.0016    |
| a                                    | 0.2223     |
| R                                    | 0.99218473 |

| Experiment derived linear regression |            |
|--------------------------------------|------------|
| parameter                            | value      |
| y0                                   | 0.0169     |
| a                                    | 0.2131     |
| R                                    | 0.99598589 |

F5

| VIC Normalized Fluorescence | Well / Cycle | FAM Normalized Fluorescence | VIC Normalized Fluorescence |
|-----------------------------|--------------|-----------------------------|-----------------------------|
| -0.030162151                | 0.56         | -0.045659811                | -0.024969128                |
| -0.005464216                | 1.56         | -0.030418376                | -0.018242486                |
| 0.005512644                 | 2.56         | -0.027891299                | -0.013259789                |
| -0.009176978                | 3.56         | -0.015703416                | -0.014754598                |
| 0.005189795                 | 4.56         | -0.019941535                | -0.002048719                |
| 0.01196962                  | 5.56         | -0.01120206                 | 0.002518754                 |
| 0.007046175                 | 6.56         | -0.000225068                | 0.007335361                 |
| 0.017377338                 | 7.56         | -0.001830815                | 0.004428788                 |
| 0.006804039                 | 8.56         | 0.014963719                 | 0.00899626                  |
| 0.014471698                 | 9.56         | 0.00711925                  | 0.00982671                  |
| 0.015520957                 | 10.56        | 0.022176419                 | 0.00899626                  |
| 0.029807017                 | 11.56        | 0.01022545                  | 0.029840545                 |
| 0.020444401                 | 12.56        | 0.026862041                 | 0.022283454                 |
| 0.02004084                  | 13.56        | 0.022887159                 | 0.026767882                 |
| 0.019960128                 | 14.56        | 0.042972159                 | 0.027764421                 |
| 0.031663398                 | 15.56        | 0.027441163                 | 0.024774803                 |
| 0.038120374                 | 16.56        | 0.033706209                 | 0.041715975                 |
| 0.035376159                 | 17.56        | 0.03873404                  | 0.031335355                 |
| 0.04272097                  | 18.56        | 0.044735848                 | 0.05184746                  |
| 0.026013544                 | 19.56        | 0.046315271                 | 0.052428774                 |
| 0.04272097                  | 20.56        | 0.046920717                 | 0.056664067                 |
| 0.048047975                 | 21.56        | 0.031179132                 | 0.06123154                  |
| 0.070485968                 | 22.56        | 0.044920114                 | 0.106574088                 |
| 0.076135822                 | 23.56        | 0.06158303                  | 0.12334917                  |
| 0.131907956                 | 24.56        | 0.059845664                 | 0.170601752                 |
| 0.164031413                 | 25.56        | 0.08401084                  | 0.220013503                 |
| 0.286794676                 | 26.56        | 0.096382989                 | 0.326975411                 |
| 0.42239118                  | 27.56        | 0.147345713                 | 0.444650119                 |
| 0.631355077                 | 28.56        | 0.140343604                 | 0.615473601                 |
| 0.902225235                 | 29.56        | 0.205784375                 | 0.80315521                  |
| 1.145330395                 | 30.56        | 0.237662401                 | 0.995570382                 |
| 1.395861078                 | 31.56        | 0.276358271                 | 1.207168939                 |
| 1.619514597                 | 32.56        | 0.358777842                 | 1.378739826                 |
| 1.882717096                 | 33.56        | 0.392235292                 | 1.608276095                 |
| 2.098460818                 | 34.56        | 0.464283317                 | 1.774781239                 |
| 2.299030646                 | 35.56        | 0.493476324                 | 1.979320975                 |
| 2.504281782                 | 36.56        | 0.580081367                 | 2.147819198                 |
| 2.646577399                 | 37.56        | 0.627490389                 | 2.277535425                 |
| 2.836412504                 | 38.56        | 0.701117837                 | 2.437895242                 |
| 3.003406055                 | 39.56        | 0.751053936                 | 2.576912505                 |

| Experiment derived linear regression |            |
|--------------------------------------|------------|
| parameter                            | value      |
| y0                                   | 0.0279     |
| a                                    | 0.2209     |
| R                                    | 0.98227916 |

AVERAGE

| Experiment derived linear regression |          |
|--------------------------------------|----------|
| parameter                            | value    |
| y0                                   | 0.016025 |
| a                                    | 0.218275 |
| R                                    |          |

| Well /<br>Cycle | Raw fluorescence data |        |        |        | Well /<br>Cycle | F6 Normalized | F7 Normalized | F8 Normalized | F9 Normalized |
|-----------------|-----------------------|--------|--------|--------|-----------------|---------------|---------------|---------------|---------------|
|                 | F6                    | F7     | F8     | F9     |                 | Fluorescence  | Fluorescence  | Fluorescence  | Fluorescence  |
| 0.56            | 356.66                | 346.39 | 357.14 | 336.73 | 0.56            | -0.0252496    | -0.0109831    | -0.0164952    | -0.0196352    |
| 1.56            | 363.8                 | 345.74 | 353.88 | 336.57 | 1.56            | -0.0057360    | -0.0128390    | -0.0254727    | -0.0201011    |
| 2.56            | 355.09                | 344.03 | 354.18 | 336.3  | 2.56            | -0.0295404    | -0.0177214    | -0.0246466    | -0.0208872    |
| 3.56            | 362.48                | 342.51 | 358.88 | 338.54 | 3.56            | -0.0093436    | -0.0220614    | -0.0117035    | -0.0143656    |
| 4.56            | 360.1                 | 344.01 | 358.96 | 340.95 | 4.56            | -0.0158481    | -0.0177785    | -0.0114832    | -0.0073490    |
| 5.56            | 362.32                | 343.74 | 362.72 | 339.02 | 5.56            | -0.0097808    | -0.0185495    | -0.0011288    | -0.0129681    |
| 6.56            | 363.86                | 350.31 | 362.25 | 342.72 | 6.56            | -0.0055720    | 0.0002093     | -0.0024231    | -0.0021958    |
| 7.56            | 361.54                | 345.21 | 360.14 | 345.19 | 7.56            | -0.0119126    | -0.0143523    | -0.0082337    | 0.0049954     |
| 8.56            | 368.84                | 352.09 | 363.77 | 346.57 | 8.56            | 0.0080383     | 0.0052916     | 0.0017627     | 0.0090132     |
| 9.56            | 367.98                | 351.45 | 367.21 | 346.75 | 9.56            | 0.0056879     | 0.0034642     | 0.0112359     | 0.0095373     |
| 10.56           | 370.95                | 351.78 | 367.39 | 347.68 | 10.56           | 0.0138049     | 0.0044064     | 0.0117316     | 0.0122449     |
| 11.56           | 365.31                | 353.47 | 367.01 | 345.39 | 11.56           | -0.0016092    | 0.0092318     | 0.0106852     | 0.0055777     |
| 12.56           | 372.26                | 357.93 | 371.96 | 349.68 | 12.56           | 0.0173851     | 0.0219660     | 0.0243166     | 0.0180677     |
| 13.56           | 373.93                | 361.57 | 367.56 | 350.96 | 13.56           | 0.0219492     | 0.0323590     | 0.0121998     | 0.0217944     |
| 14.56           | 375.18                | 363.11 | 370.91 | 352.87 | 14.56           | 0.0253655     | 0.0367560     | 0.0214251     | 0.0273552     |
| 15.56           | 372.08                | 356.79 | 369.34 | 345.58 | 15.56           | 0.0168932     | 0.0187111     | 0.0171016     | 0.0061309     |
| 16.58           | 374.41                | 356.42 | 366.76 | 353.18 | 16.58           | 0.0232611     | 0.0176546     | 0.0099967     | 0.0282577     |
| 17.58           | 371.28                | 361.4  | 369.57 | 351.19 | 17.58           | 0.0147068     | 0.0318736     | 0.0177350     | 0.0224640     |
| 18.58           | 376.79                | 359.26 | 372    | 352.23 | 18.58           | 0.0297656     | 0.0257634     | 0.0244268     | 0.0254919     |
| 19.58           | 372.88                | 359.73 | 371.59 | 351.1  | 19.58           | 0.0190796     | 0.0271054     | 0.0232977     | 0.0222020     |
| 20.58           | 377.37                | 360.11 | 375.67 | 354.22 | 20.58           | 0.0313507     | 0.0281904     | 0.0345334     | 0.0312856     |
| 21.58           | 374.03                | 356.54 | 369.87 | 353.61 | 21.58           | 0.0222225     | 0.0179973     | 0.0185611     | 0.0295096     |
| 22.58           | 374.09                | 354.42 | 372.9  | 354.04 | 22.58           | 0.0223865     | 0.0119442     | 0.0269052     | 0.0307616     |
| 23.58           | 378.45                | 360.39 | 373.07 | 355.35 | 23.58           | 0.0343024     | 0.0289898     | 0.0273734     | 0.0345755     |
| 24.58           | 377.5                 | 362.67 | 372.8  | 356.5  | 24.58           | 0.0317060     | 0.0354997     | 0.0266299     | 0.0379237     |
| 25.58           | 383.52                | 366.6  | 385.65 | 364.51 | 25.58           | 0.0481587     | 0.0467207     | 0.0620167     | 0.0612442     |
| 26.58           | 385.06                | 370.59 | 383.06 | 366.23 | 26.58           | 0.0523675     | 0.0581130     | 0.0548842     | 0.0662518     |
| 27.58           | 400.98                | 380.44 | 398.29 | 376.44 | 27.58           | 0.0958768     | 0.0862368     | 0.0968251     | 0.0959775     |
| 28.56           | 404.58                | 388.8  | 401.33 | 387.63 | 28.56           | 0.1057156     | 0.1101064     | 0.1051968     | 0.1285564     |
| 29.61           | 419.24                | 403.3  | 416.36 | 397.19 | 29.61           | 0.1457813     | 0.1515070     | 0.1465869     | 0.1563896     |
| 30.56           | 433.84                | 418.46 | 428.9  | 409.89 | 30.56           | 0.1856830     | 0.1947920     | 0.1811200     | 0.1933647     |
| 31.63           | 450.17                | 429.31 | 445.61 | 422.61 | 31.63           | 0.2303129     | 0.2257710     | 0.2271366     | 0.2303981     |
| 32.63           | 467.46                | 442.59 | 460.32 | 430.69 | 32.63           | 0.2775664     | 0.2636882     | 0.2676455     | 0.2539224     |
| 33.63           | 479.29                | 455.86 | 469.69 | 441.79 | 33.63           | 0.3098977     | 0.3015769     | 0.2934490     | 0.2862393     |
| 34.63           | 498.35                | 471.39 | 482.14 | 458.79 | 34.63           | 0.3619886     | 0.3459183     | 0.3277342     | 0.3357335     |
| 35.63           | 508.23                | 480.33 | 498.47 | 457.32 | 35.63           | 0.3889906     | 0.3714439     | 0.3727044     | 0.3314537     |
| 36.63           | 538.34                | 495.92 | 510.17 | 473.68 | 36.63           | 0.4712811     | 0.4159567     | 0.4049242     | 0.3790847     |
| 37.65           | 552.89                | 516.45 | 522.12 | 490.62 | 37.65           | 0.5110462     | 0.4745742     | 0.4378326     | 0.4284042     |
| 38.65           | 577.01                | 532.28 | 544.32 | 500.84 | 38.65           | 0.5769661     | 0.5197722     | 0.4989677     | 0.4581590     |
| 39.65           | 584.71                | 548.65 | 550.88 | 509.54 | 39.65           | 0.5980102     | 0.5665120     | 0.5170329     | 0.4834884     |
| Parameter       |                       |        |        |        |                 |               |               |               |               |
| a               | 295.43                | 261.77 | 233.44 | 208.30 |                 |               |               |               |               |
| b               | 3.86                  | 4.04   | 3.84   | 4.16   |                 |               |               |               |               |
| x0              | 35.45                 | 35.34  | 34.33  | 34.12  |                 |               |               |               |               |
| y0              | 365.90                | 350.24 | 363.13 | 343.47 |                 |               |               |               |               |
| R               | 1.00                  | 1.00   | 1.00   | 1.00   |                 |               |               |               |               |
| CP(SDM)         | 30.36                 | 30.02  | 29.27  | 28.64  |                 |               |               |               |               |

| Well /<br>Cycle           | Raw fluorescence data |        |        |        | Well /<br>Cycle | F6 Normalized | F7 Normalized | F8 Normalized | F9 Normalized |
|---------------------------|-----------------------|--------|--------|--------|-----------------|---------------|---------------|---------------|---------------|
|                           | F6                    | F7     | F8     | F9     |                 | Fluorescence  | Fluorescence  | Fluorescence  | Fluorescence  |
| 0.56                      | 124.81                | 121.1  | 122.03 | 114.29 | 0.56            | -0.0121352    | -0.0262220    | -0.0106636    | 0.0034302     |
| 1.56                      | 124.4                 | 122.09 | 121.01 | 112.55 | 1.56            | -0.0153803    | -0.0182614    | -0.0189330    | -0.0118464    |
| 2.56                      | 124.97                | 121.74 | 123.01 | 111.73 | 2.56            | -0.0108688    | -0.0210757    | -0.0027184    | -0.0190458    |
| 3.56                      | 124.88                | 123.04 | 122.13 | 113.16 | 3.56            | -0.0115812    | -0.0106223    | -0.0098528    | -0.0064908    |
| 4.56                      | 127.08                | 123.71 | 123.45 | 113.45 | 4.56            | 0.0058317     | -0.0052348    | 0.0008488     | -0.0039447    |
| 5.56                      | 127.91                | 124.91 | 126.31 | 113.71 | 5.56            | 0.0124011     | 0.0044146     | 0.0240358     | -0.0016620    |
| 6.56                      | 129.3                 | 124.55 | 124.78 | 114.86 | 6.56            | 0.0234029     | 0.0015198     | 0.0116316     | 0.0084346     |
| 7.56                      | 126.08                | 124.32 | 124.76 | 115.42 | 7.56            | -0.0020832    | -0.0003297    | 0.0114694     | 0.0133513     |
| 8.56                      | 126.81                | 126.85 | 124.23 | 115.87 | 8.56            | 0.0036947     | 0.0200143     | 0.0071725     | 0.0173021     |
| 9.56                      | 128.15                | 126.73 | 128.32 | 115.05 | 9.56            | 0.0143007     | 0.0190494     | 0.0403315     | 0.0101028     |
| 10.56                     | 129.34                | 127.01 | 124.65 | 115.11 | 10.56           | 0.0237195     | 0.0213009     | 0.0105776     | 0.0106296     |
| 11.56                     | 128.02                | 128.41 | 128.3  | 116.85 | 11.56           | 0.0132718     | 0.0325584     | 0.0401693     | 0.0259062     |
| 12.56                     | 129.98                | 125.59 | 126.03 | 116.42 | 12.56           | 0.0287851     | 0.0098825     | 0.0217657     | 0.0221310     |
| 13.56                     | 129.41                | 126.27 | 126.62 | 117.04 | 13.56           | 0.0242736     | 0.0153505     | 0.0265490     | 0.0275744     |
| 14.56                     | 129.03                | 128.45 | 125.98 | 119.34 | 14.56           | 0.0212659     | 0.0328801     | 0.0213604     | 0.0477676     |
| 15.56                     | 132.47                | 127.69 | 124.38 | 118.27 | 15.56           | 0.0484933     | 0.0267688     | 0.0083886     | 0.0383734     |
| 16.58                     | 129.51                | 127.57 | 125.19 | 116.86 | 16.58           | 0.0250651     | 0.0258039     | 0.0149556     | 0.0259940     |
| 17.58                     | 129.46                | 128.01 | 126.27 | 117.35 | 17.58           | 0.0246693     | 0.0293420     | 0.0237115     | 0.0302961     |
| 18.58                     | 131.7                 | 129.5  | 128.59 | 117.68 | 18.58           | 0.0423988     | 0.0413232     | 0.0425205     | 0.0331934     |
| 19.58                     | 133.39                | 128.56 | 126.79 | 118.2  | 19.58           | 0.0557751     | 0.0337646     | 0.0279273     | 0.0377588     |
| 20.58                     | 134.15                | 132.2  | 130.17 | 120.86 | 20.58           | 0.0617904     | 0.0630342     | 0.0553300     | 0.0611128     |
| 21.58                     | 133.22                | 134.26 | 130.5  | 122.3  | 21.58           | 0.0544295     | 0.0795989     | 0.0580055     | 0.0737555     |
| 22.58                     | 136.46                | 136.15 | 133.57 | 122.11 | 22.58           | 0.0800740     | 0.0947966     | 0.0828949     | 0.0720874     |
| 23.58                     | 140.58                | 138.62 | 135.43 | 126.86 | 23.58           | 0.1126835     | 0.1146581     | 0.0979745     | 0.1137909     |
| 24.58                     | 144.81                | 142.12 | 142.55 | 131.06 | 24.58           | 0.1461638     | 0.1428020     | 0.1556987     | 0.1506655     |
| 25.58                     | 154.37                | 148.92 | 147.28 | 136.07 | 25.58           | 0.2218307     | 0.1974815     | 0.1940463     | 0.1946518     |
| 26.58                     | 172.44                | 160.94 | 163.64 | 151.21 | 26.58           | 0.3648538     | 0.2941356     | 0.3266821     | 0.3275762     |
| 27.58                     | 192.82                | 183.03 | 184.91 | 169.11 | 27.58           | 0.5261605     | 0.4717637     | 0.4991248     | 0.4847326     |
| 28.56                     | 222.51                | 210.49 | 210.76 | 192.88 | 28.56           | 0.7611553     | 0.6925724     | 0.7086991     | 0.6934257     |
| 29.61                     | 258.4                 | 240.77 | 242.41 | 220.45 | 29.61           | 1.0452229     | 0.9360571     | 0.9652958     | 0.9354816     |
| 30.56                     | 293.97                | 273.29 | 273.56 | 245.33 | 30.56           | 1.3267576     | 1.1975539     | 1.2178389     | 1.1539202     |
| 31.63                     | 330.71                | 303.54 | 303.5  | 269.59 | 31.63           | 1.6175528     | 1.4407974     | 1.4605721     | 1.3669153     |
| 32.63                     | 364.45                | 333.23 | 328.84 | 290.18 | 32.63           | 1.8846032     | 1.6795378     | 1.6660116     | 1.5476891     |
| 33.63                     | 391.88                | 361.54 | 359.82 | 311.39 | 33.63           | 2.1017103     | 1.9071815     | 1.9171764     | 1.7339062     |
| 34.63                     | 421.63                | 383.84 | 382.32 | 328.7  | 34.63           | 2.3371800     | 2.0864982     | 2.0995911     | 1.8858825     |
| 35.63                     | 452.82                | 407.72 | 408.75 | 351.98 | 35.63           | 2.5840473     | 2.2785198     | 2.3138677     | 2.0902736     |
| 36.63                     | 476.2                 | 431.83 | 426.69 | 366.94 | 36.63           | 2.7690988     | 2.4723909     | 2.4593130     | 2.2216177     |
| 37.65                     | 495.66                | 448.78 | 445.82 | 379.4  | 37.65           | 2.9231237     | 2.6086876     | 2.6144061     | 2.3310126     |
| 38.65                     | 514.67                | 466.42 | 462.98 | 399.2  | 38.65           | 3.0735869     | 2.7505327     | 2.7535277     | 2.5048503     |
| 39.65                     | 537.98                | 483.1  | 484.66 | 417.12 | 39.65           | 3.2580843     | 2.8846584     | 2.9292944     | 2.6621823     |
| <b>Parameter</b>          |                       |        |        |        |                 |               |               |               |               |
| <b>a</b>                  | 423.87                | 370.75 | 370.98 | 310.38 |                 |               |               |               |               |
| <b>b</b>                  | 2.79                  | 2.79   | 2.83   | 2.93   |                 |               |               |               |               |
| <b>x0</b>                 | 32.04                 | 32.00  | 32.00  | 31.87  |                 |               |               |               |               |
| <b>y0</b>                 | 126.34                | 124.36 | 123.35 | 113.90 |                 |               |               |               |               |
| <b>R</b>                  | 1.00                  | 1.00   | 1.00   | 1.00   |                 |               |               |               |               |
| <b>CP<sub>(SDM)</sub></b> | 28.37                 | 28.33  | 28.27  | 28.01  |                 |               |               |               |               |

| F6              |                                |                                | F7              |                                |                                | F8              |                                |
|-----------------|--------------------------------|--------------------------------|-----------------|--------------------------------|--------------------------------|-----------------|--------------------------------|
| Well /<br>Cycle | FAM Normalized<br>Fluorescence | VIC Normalized<br>Fluorescence | Well /<br>Cycle | FAM Normalized<br>Fluorescence | VIC Normalized<br>Fluorescence | Well /<br>Cycle | FAM Normalized<br>Fluorescence |
| 0.56            | -0.0252496                     | -0.0121352                     | 0.6             | -0.010983144                   | -0.026222047                   | 0.56            | -0.0164952                     |
| 1.56            | -0.0057360                     | -0.015380329                   | 1.6             | -0.012839031                   | -0.018261352                   | 1.56            | -0.0254727                     |
| 2.56            | -0.0295404                     | -0.010868808                   | 2.6             | -0.017721444                   | -0.021075739                   | 2.56            | -0.0246466                     |
| 3.56            | -0.0093436                     | -0.011581154                   | 3.6             | -0.022061366                   | -0.010622301                   | 3.56            | -0.0117035                     |
| 4.56            | -0.0158481                     | 0.005831735                    | 4.6             | -0.017778548                   | -0.00523476                    | 4.56            | -0.0114832                     |
| 5.56            | -0.0097808                     | 0.012401142                    | 5.6             | -0.018549455                   | 0.004414567                    | 5.56            | -0.0011288                     |
| 6.56            | -0.0055720                     | 0.023402922                    | 6.6             | 0.000209287                    | 0.001519769                    | 6.56            | -0.0024231                     |
| 7.56            | -0.0119126                     | -0.002083215                   | 7.6             | -0.014352294                   | -0.000329685                   | 7.56            | -0.0082337                     |
| 8.56            | 0.0080383                      | 0.003694698                    | 8.6             | 0.005291564                    | 0.020014313                    | 8.56            | 0.0017627                      |
| 9.56            | 0.0056879                      | 0.01430073                     | 9.6             | 0.003464229                    | 0.01904938                     | 9.56            | 0.0112359                      |
| 10.56           | 0.0138049                      | 0.02371952                     | 11              | 0.004406449                    | 0.02130089                     | 10.56           | 0.0117316                      |
| 11.56           | -0.0016092                     | 0.013271787                    | 12              | 0.009231757                    | 0.032558439                    | 11.56           | 0.0106852                      |
| 12.56           | 0.0173851                      | 0.028785087                    | 13              | 0.021966002                    | 0.009882519                    | 12.56           | 0.0243166                      |
| 13.56           | 0.0219492                      | 0.024273566                    | 14              | 0.032358973                    | 0.015350472                    | 13.56           | 0.0121998                      |
| 14.56           | 0.0253655                      | 0.021265885                    | 15              | 0.036756                       | 0.032880083                    | 14.56           | 0.0214251                      |
| 15.56           | 0.0168932                      | 0.04849331                     | 16              | 0.01871106                     | 0.026768842                    | 15.56           | 0.0171016                      |
| 16.58           | 0.0232611                      | 0.025065061                    | 17              | 0.017654632                    | 0.02580391                     | 16.58           | 0.0099967                      |
| 17.58           | 0.0147068                      | 0.024669313                    | 18              | 0.031873587                    | 0.029341996                    | 17.58           | 0.0177350                      |
| 18.58           | 0.0297656                      | 0.042398799                    | 19              | 0.025763434                    | 0.041323244                    | 18.58           | 0.0244268                      |
| 19.58           | 0.0190796                      | 0.055775063                    | 20              | 0.027105383                    | 0.033764605                    | 19.58           | 0.0232977                      |
| 20.58           | 0.0313507                      | 0.061790425                    | 21              | 0.028190364                    | 0.063034231                    | 20.58           | 0.0345334                      |
| 21.58           | 0.0222225                      | 0.054429522                    | 22              | 0.017997257                    | 0.07959891                     | 21.58           | 0.0185611                      |
| 22.58           | 0.0223865                      | 0.080073957                    | 23              | 0.011944208                    | 0.0947966                      | 22.58           | 0.0269052                      |
| 23.58           | 0.0343024                      | 0.112683548                    | 24              | 0.028989823                    | 0.114658132                    | 23.58           | 0.0273734                      |
| 24.58           | 0.0317060                      | 0.146163782                    | 25              | 0.035499706                    | 0.142802004                    | 24.58           | 0.0266299                      |
| 25.58           | 0.0481587                      | 0.221830696                    | 26              | 0.046720689                    | 0.197481526                    | 25.58           | 0.0620167                      |
| 26.58           | 0.0523675                      | 0.364853827                    | 27              | 0.058112985                    | 0.294135621                    | 26.58           | 0.0548842                      |
| 27.58           | 0.0958768                      | 0.52616049                     | 28              | 0.086236822                    | 0.471763656                    | 27.58           | 0.0968251                      |
| 28.56           | 0.1057156                      | 0.761155329                    | 29              | 0.110106394                    | 0.69257243                     | 28.56           | 0.1051968                      |
| 29.61           | 0.1457813                      | 1.045222853                    | 30              | 0.151506967                    | 0.936057124                    | 29.61           | 0.1465869                      |
| 30.56           | 0.1856830                      | 1.326757594                    | 31              | 0.194791979                    | 1.197553896                    | 30.56           | 0.1811200                      |
| 31.63           | 0.2303129                      | 1.617552824                    | 32              | 0.225771029                    | 1.440797356                    | 31.63           | 0.2271366                      |
| 32.63           | 0.2775664                      | 1.884603208                    | 33              | 0.263688243                    | 1.679537797                    | 32.63           | 0.2676455                      |
| 33.63           | 0.3098977                      | 2.101710262                    | 34              | 0.301576905                    | 1.907181512                    | 33.63           | 0.2934490                      |
| 34.63           | 0.3619886                      | 2.337179999                    | 35              | 0.345918346                    | 2.086498179                    | 34.63           | 0.3277342                      |
| 35.63           | 0.3889906                      | 2.584047262                    | 36              | 0.371443941                    | 2.278519793                    | 35.63           | 0.3727044                      |
| 36.63           | 0.4712811                      | 2.769098772                    | 37              | 0.415956694                    | 2.472390862                    | 36.63           | 0.4049242                      |
| 37.65           | 0.5110462                      | 2.923123682                    | 38              | 0.474574195                    | 2.608687611                    | 37.65           | 0.4378326                      |
| 38.65           | 0.5769661                      | 3.073586865                    | 39              | 0.5197722                      | 2.750532723                    | 38.65           | 0.4989677                      |
| 39.65           | 0.5980102                      | 3.258084329                    | 40              | 0.566512019                    | 2.884658374                    | 39.65           | 0.5170329                      |

  

| F6        |            | F7        |            | F8        |            |
|-----------|------------|-----------|------------|-----------|------------|
| parameter | value      | parameter | value      | parameter | value      |
| y0        | 0.0055     | y0        | 0.0131     | y0        | 0.0064     |
| a         | 0.14020000 | a         | 0.148700   | a         | 0.1511     |
| R         | 0.99375831 | R         | 0.99908558 | R         | 0.99267996 |

F9

| VIC Normalized Fluorescence | Well / Cycle | FAM Normalized Fluorescence | VIC Normalized Fluorescence |
|-----------------------------|--------------|-----------------------------|-----------------------------|
| -0.01066356                 | 0.56         | -0.019635245                | 0.003430223                 |
| -0.018933028                | 1.56         | -0.020101073                | -0.011846429                |
| -0.002718385                | 2.56         | -0.020887158                | -0.019045771                |
| -0.009852828                | 3.56         | -0.014365562                | -0.006490821                |
| 0.000848837                 | 4.56         | -0.007349024                | -0.003944713                |
| 0.024035776                 | 5.56         | -0.012968077                | -0.001661994                |
| 0.011631574                 | 6.56         | -0.002195798                | 0.008434644                 |
| 0.011469428                 | 7.56         | 0.004995426                 | 0.013351267                 |
| 0.007172547                 | 8.56         | 0.009013195                 | 0.017302126                 |
| 0.040331492                 | 9.56         | 0.009537252                 | 0.010102784                 |
| 0.010577622                 | 10.56        | 0.012244879                 | 0.010629565                 |
| 0.040169346                 | 11.56        | 0.005577712                 | 0.025906217                 |
| 0.021765726                 | 12.56        | 0.018067733                 | 0.022130953                 |
| 0.026549046                 | 13.56        | 0.021794359                 | 0.027574357                 |
| 0.02136036                  | 14.56        | 0.027355184                 | 0.047767633                 |
| 0.008388646                 | 15.56        | 0.006130883                 | 0.03837337                  |
| 0.014955576                 | 16.58        | 0.028257726                 | 0.025994014                 |
| 0.023711483                 | 17.58        | 0.022463987                 | 0.03029606                  |
| 0.042520469                 | 18.58        | 0.025491871                 | 0.033193356                 |
| 0.02792729                  | 19.58        | 0.022201959                 | 0.037758792                 |
| 0.055330037                 | 20.58        | 0.03128561                  | 0.061112755                 |
| 0.058005453                 | 21.58        | 0.02950964                  | 0.073755502                 |
| 0.08289493                  | 22.58        | 0.030761554                 | 0.072087361                 |
| 0.097974548                 | 23.58        | 0.034575523                 | 0.113790866                 |
| 0.155698677                 | 24.58        | 0.037923664                 | 0.150665544                 |
| 0.194046307                 | 25.58        | 0.061244192                 | 0.194651767                 |
| 0.326682087                 | 26.58        | 0.066251847                 | 0.327576201                 |
| 0.499124815                 | 27.58        | 0.095977514                 | 0.484732566                 |
| 0.708699075                 | 28.56        | 0.128556381                 | 0.693425684                 |
| 0.9652958                   | 29.61        | 0.156389621                 | 0.935481605                 |
| 1.217838864                 | 30.56        | 0.193364742                 | 1.153920173                 |
| 1.460572069                 | 31.63        | 0.230398091                 | 1.366915337                 |
| 1.666011595                 | 32.63        | 0.25392242                  | 1.547689055                 |
| 1.917176415                 | 33.63        | 0.286239258                 | 1.733906179                 |
| 2.099591148                 | 34.63        | 0.335733514                 | 1.88588253                  |
| 2.313867654                 | 35.63        | 0.331453716                 | 2.090273601                 |
| 2.459313002                 | 36.63        | 0.379084659                 | 2.221617692                 |
| 2.614406062                 | 37.65        | 0.428404229                 | 2.33101257                  |
| 2.753527698                 | 38.65        | 0.458159012                 | 2.504850337                 |
| 2.929294428                 | 39.65        | 0.483488425                 | 2.662182296                 |

| ment derived linear regr |                   |
|--------------------------|-------------------|
| paramete                 | value             |
| y0                       | 0.0192            |
| a                        | 0.1522            |
| <b>R</b>                 | <b>0.99876291</b> |

| average | ment derived linear regr |         |
|---------|--------------------------|---------|
|         | paramete                 | value   |
|         | y0                       | 0.01105 |
|         | a                        | 0.14805 |

| Well /<br>Cycle     | Raw fluorescence data |        |        |        | Well /<br>Cycle | G2 Normalized | G3 Normalized | G4 Normalized | G5 Normalized |
|---------------------|-----------------------|--------|--------|--------|-----------------|---------------|---------------|---------------|---------------|
|                     | G2                    | G3     | G4     | G5     |                 | Fluorescence  | Fluorescence  | Fluorescence  | Fluorescence  |
| 0.56                | 320.64                | 328.26 | 309.07 | 334.16 | 0.56            | -0.0433383    | -0.0208384    | -0.0306293    | -0.0172438    |
| 1.56                | 325.86                | 331.9  | 315.46 | 334.51 | 1.56            | -0.0277639    | -0.0099807    | -0.0105876    | -0.0162145    |
| 2.56                | 327.44                | 326.67 | 311.66 | 330.66 | 2.56            | -0.0230498    | -0.0255812    | -0.0225059    | -0.0275372    |
| 3.56                | 330.69                | 333.43 | 317.08 | 336.9  | 3.56            | -0.0133531    | -0.0054169    | -0.0055066    | -0.0091855    |
| 4.56                | 330.92                | 329.74 | 315.56 | 334.04 | 4.56            | -0.0126669    | -0.0164238    | -0.0102739    | -0.0175967    |
| 5.56                | 329.63                | 331    | 317.75 | 337.59 | 5.56            | -0.0165157    | -0.0126653    | -0.0034052    | -0.0071563    |
| 6.56                | 338.28                | 333.61 | 320.24 | 340.29 | 6.56            | 0.0092924     | -0.0048800    | 0.0044045     | 0.0007844     |
| 7.56                | 337.19                | 334.93 | 322.19 | 343.06 | 7.56            | 0.0060403     | -0.0009426    | 0.0105205     | 0.0089309     |
| 8.56                | 342.12                | 337.55 | 321.58 | 344.9  | 8.56            | 0.0207495     | 0.0068726     | 0.0086073     | 0.0143423     |
| 9.56                | 336.75                | 333.53 | 321.19 | 342.56 | 9.56            | 0.0047275     | -0.0051186    | 0.0073841     | 0.0074604     |
| 10.56               | 338.05                | 337.92 | 324.35 | 348.58 | 10.56           | 0.0086062     | 0.0079762     | 0.0172951     | 0.0251650     |
| 11.56               | 337.89                | 336.6  | 321.47 | 345.15 | 11.56           | 0.0081288     | 0.0040388     | 0.0082622     | 0.0150775     |
| 12.56               | 341.68                | 340.95 | 324.26 | 350.38 | 12.56           | 0.0194367     | 0.0170144     | 0.0170128     | 0.0304588     |
| 13.56               | 343.6                 | 342.75 | 325.41 | 351.37 | 13.56           | 0.0251652     | 0.0223836     | 0.0206197     | 0.0333704     |
| 14.56               | 345.39                | 340.44 | 326.47 | 349.81 | 14.56           | 0.0305058     | 0.0154931     | 0.0239443     | 0.0287824     |
| 15.56               | 345.39                | 341.94 | 327.6  | 348.86 | 15.56           | 0.0305058     | 0.0199674     | 0.0274885     | 0.0259885     |
| 16.58               | 345.92                | 336.56 | 330.13 | 349.1  | 16.58           | 0.0320871     | 0.0039195     | 0.0354236     | 0.0266943     |
| 17.58               | 346.35                | 339.86 | 327.84 | 352.99 | 17.58           | 0.0333701     | 0.0137630     | 0.0282412     | 0.0381347     |
| 18.58               | 343.8                 | 341.82 | 330.04 | 355.56 | 18.58           | 0.0257619     | 0.0196095     | 0.0351413     | 0.0456930     |
| 19.58               | 349.21                | 346.94 | 332.2  | 354.01 | 19.58           | 0.0419032     | 0.0348818     | 0.0419159     | 0.0411345     |
| 20.58               | 345.73                | 344.54 | 329.7  | 355.49 | 20.58           | 0.0315202     | 0.0277229     | 0.0340749     | 0.0454872     |
| 21.58               | 337.13                | 341.14 | 325.15 | 354.52 | 21.58           | 0.0058613     | 0.0175811     | 0.0198042     | 0.0426344     |
| 22.58               | 339.13                | 341.81 | 328.19 | 353.53 | 22.58           | 0.0118285     | 0.0195797     | 0.0293389     | 0.0397229     |
| 23.58               | 349.68                | 343    | 328.1  | 354.46 | 23.58           | 0.0433055     | 0.0231293     | 0.0290567     | 0.0424580     |
| 24.58               | 343.88                | 341.66 | 327.72 | 354.12 | 24.58           | 0.0260006     | 0.0191322     | 0.0278648     | 0.0414580     |
| 25.58               | 352.88                | 344.92 | 332.28 | 354.1  | 25.58           | 0.0528530     | 0.0288564     | 0.0421669     | 0.0413992     |
| 26.58               | 349.66                | 346.77 | 334.21 | 358.3  | 26.58           | 0.0432458     | 0.0343748     | 0.0482201     | 0.0537513     |
| 27.58               | 356.92                | 348.73 | 336.72 | 366.92 | 27.58           | 0.0649067     | 0.0402212     | 0.0560925     | 0.0791025     |
| 28.56               | 363.4                 | 354.94 | 337.21 | 364.24 | 28.56           | 0.0842405     | 0.0587449     | 0.0576294     | 0.0712207     |
| 29.61               | 370.96                | 358.58 | 345.88 | 371.32 | 29.61           | 0.1067965     | 0.0696026     | 0.0848221     | 0.0920428     |
| 30.56               | 374.61                | 370.72 | 352.63 | 379.95 | 30.56           | 0.1176866     | 0.1058148     | 0.1059928     | 0.1174234     |
| 31.63               | 378.42                | 371.83 | 352.33 | 382.88 | 31.63           | 0.1290542     | 0.1091258     | 0.1050519     | 0.1260405     |
| 32.63               | 392.92                | 385.62 | 364.81 | 393.38 | 32.63           | 0.1723164     | 0.1502598     | 0.1441943     | 0.1569207     |
| 33.63               | 398.96                | 391.6  | 369.03 | 398.23 | 33.63           | 0.1903373     | 0.1680975     | 0.1574300     | 0.1711844     |
| 34.63               | 416.61                | 406.71 | 376.27 | 409.36 | 34.63           | 0.2429979     | 0.2131688     | 0.1801376     | 0.2039175     |
| 35.63               | 415.66                | 411.66 | 380.87 | 418.96 | 35.63           | 0.2401634     | 0.2279341     | 0.1945651     | 0.2321509     |
| 36.63               | 429.44                | 428.66 | 393.56 | 432.85 | 36.63           | 0.2812775     | 0.2786431     | 0.2343662     | 0.2730010     |
| 37.65               | 444.84                | 438.63 | 400.95 | 442.51 | 37.65           | 0.3272249     | 0.3083825     | 0.2575442     | 0.3014108     |
| 38.65               | 457.04                | 454.24 | 407.4  | 455.74 | 38.65           | 0.3636248     | 0.3549453     | 0.2777741     | 0.3403199     |
| 39.65               | 462.19                | 468.73 | 417.16 | 459.63 | 39.65           | 0.3789904     | 0.3981673     | 0.3083855     | 0.3517603     |
| Parameter           |                       |        |        |        | Parameter       | Value         |               |               |               |
| a                   | 260.50                | 260.12 | 386.17 | 958.66 | a               | 0.7772        | 0.78          | 1.21          | 2.819400      |
| b                   | 5.31                  | 4.52   | 6.72   | 7.30   | b               | 5.3081        | 4.52          | 6.72          | 7.296100      |
| x0                  | 39.57                 | 39.41  | 46.66  | 53.41  | x0              | 39.5719       | 39.41         | 46.66         | 53.405300     |
| y0                  | 335.17                | 335.25 | 318.84 | 340.02 | y0              | 0.0000        | 0.00          | 0.00          | 0.000000      |
| R                   | 0.99                  | 0.99   | 0.99   | 0.99   | R               | 0.988974      | 0.994596      | 0.989732      | 0.990279      |
| CP <sub>(SDM)</sub> | 32.58                 | 33.45  | 37.81  | 43.80  |                 |               |               |               |               |

| Well /<br>Cycle           | Raw fluorescence data |          |          |          | Well /<br>Fluorescence | G2 Normalized | G3 Normalized | G4 Normalized | G5 Normalized |
|---------------------------|-----------------------|----------|----------|----------|------------------------|---------------|---------------|---------------|---------------|
|                           | G2                    | G3       | G4       | G5       |                        | Fluorescence  | Fluorescence  | Fluorescence  | Fluorescence  |
| 0.56                      | 110.55                | 115.86   | 118.52   | 116.78   | 0.56                   | -0.0405387    | -0.0108232    | -0.0395361    | -0.0321308    |
| 1.56                      | 113.25                | 114.65   | 119.92   | 117.36   | 1.56                   | -0.0171054    | -0.0211538    | -0.0281907    | -0.0273238    |
| 2.56                      | 112.68                | 114.56   | 122.67   | 117.83   | 2.56                   | -0.0220524    | -0.0219222    | -0.0059052    | -0.0234284    |
| 3.56                      | 114.12                | 115.68   | 122.04   | 117.65   | 3.56                   | -0.0095547    | -0.0123600    | -0.0110107    | -0.0249203    |
| 4.56                      | 114.91                | 114.33   | 122.78   | 119.03   | 4.56                   | -0.0026983    | -0.0238859    | -0.0050138    | -0.0134829    |
| 5.56                      | 114.06                | 116.9    | 123.32   | 120.79   | 5.56                   | -0.0100754    | -0.0019440    | -0.0006378    | 0.0011040     |
| 6.56                      | 114.33                | 117.92   | 124.66   | 120.91   | 6.56                   | -0.0077321    | 0.0067644     | 0.0102213     | 0.0020985     |
| 7.56                      | 116.65                | 120.02   | 124.18   | 121.29   | 7.56                   | 0.0124031     | 0.0246936     | 0.0063315     | 0.0052479     |
| 8.56                      | 118.39                | 120.77   | 124.93   | 122.66   | 8.56                   | 0.0275046     | 0.0310968     | 0.0124094     | 0.0166025     |
| 9.56                      | 117.73                | 120.47   | 123.96   | 121.89   | 9.56                   | 0.0217764     | 0.0285355     | 0.0045487     | 0.0102207     |
| 10.56                     | 118.94                | 120.16   | 123.61   | 122.18   | 10.56                  | 0.0322780     | 0.0258888     | 0.0017123     | 0.0126242     |
| 11.56                     | 119.17                | 121.54   | 126.15   | 123.55   | 11.56                  | 0.0342742     | 0.0376708     | 0.0222960     | 0.0239788     |
| 12.56                     | 119.41                | 119.51   | 125.31   | 123.44   | 12.56                  | 0.0363571     | 0.0203393     | 0.0154888     | 0.0230671     |
| 13.56                     | 119.56                | 121.1    | 126.68   | 124.01   | 13.56                  | 0.0376590     | 0.0339143     | 0.0265910     | 0.0277912     |
| 14.56                     | 118.72                | 119.92   | 127.46   | 126.35   | 14.56                  | 0.0303686     | 0.0238398     | 0.0329120     | 0.0471851     |
| 15.56                     | 119.32                | 119.34   | 127.59   | 126.03   | 15.56                  | 0.0355760     | 0.0188879     | 0.0339655     | 0.0445329     |
| 16.58                     | 118.84                | 120.39   | 127.55   | 126.66   | 16.58                  | 0.0314101     | 0.0278525     | 0.0336414     | 0.0497543     |
| 17.58                     | 120.35                | 120.64   | 129.24   | 125.91   | 17.58                  | 0.0445154     | 0.0299869     | 0.0473368     | 0.0435384     |
| 18.58                     | 119.31                | 121.32   | 127.85   | 125.93   | 18.58                  | 0.0354892     | 0.0357926     | 0.0360725     | 0.0437041     |
| 19.58                     | 121.94                | 122.63   | 128.25   | 127.54   | 19.58                  | 0.0583149     | 0.0469769     | 0.0393140     | 0.0570478     |
| 20.58                     | 124.43                | 124.08   | 128.72   | 126.87   | 20.58                  | 0.0799256     | 0.0593566     | 0.0431228     | 0.0514948     |
| 21.58                     | 123.65                | 124.6    | 130.36   | 130.23   | 21.58                  | 0.0731560     | 0.0637962     | 0.0564131     | 0.0793424     |
| 22.58                     | 128.14                | 127.99   | 130.68   | 132.78   | 22.58                  | 0.1121246     | 0.0927390     | 0.0590063     | 0.1004767     |
| 23.58                     | 131.32                | 129.64   | 135.98   | 134.84   | 23.58                  | 0.1397238     | 0.1068261     | 0.1019565     | 0.1175499     |
| 24.58                     | 138.12                | 139.81   | 139.81   | 143.11   | 24.58                  | 0.1987409     | 0.1936544     | 0.1329941     | 0.1860915     |
| 25.58                     | 149.86                | 147.81   | 149.13   | 150.4    | 25.58                  | 0.3006321     | 0.2619560     | 0.2085216     | 0.2465108     |
| 26.58                     | 171.92                | 172.48   | 164.36   | 170.48   | 26.58                  | 0.4920904     | 0.4725808     | 0.3319427     | 0.4129332     |
| 27.58                     | 200.15                | 191.78   | 180.89   | 189.67   | 27.58                  | 0.7370980     | 0.6373582     | 0.4658987     | 0.5719794     |
| 28.56                     | 237.1                 | 231.86   | 210.09   | 220.45   | 28.56                  | 1.0577864     | 0.9795488     | 0.7025301     | 0.8270831     |
| 29.61                     | 278.69                | 271.38   | 243.59   | 259.84   | 29.61                  | 1.4187452     | 1.3169583     | 0.9740078     | 1.1535463     |
| 30.56                     | 319.6                 | 310.57   | 275.04   | 295.92   | 30.56                  | 1.7738023     | 1.6515504     | 1.2288728     | 1.4525762     |
| 31.63                     | 354.59                | 357.1    | 307.02   | 327.47   | 31.63                  | 2.0774799     | 2.0488091     | 1.4880327     | 1.7140617     |
| 32.63                     | 385.95                | 387.51   | 335.7    | 358.1    | 32.63                  | 2.3496527     | 2.3084403     | 1.7204501     | 1.9679222     |
| 33.63                     | 415.5                 | 419.85   | 363.38   | 397.5    | 33.63                  | 2.6061166     | 2.5845492     | 1.9447636     | 2.2944683     |
| 34.63                     | 440.02                | 445.8    | 386.05   | 422.2    | 34.63                  | 2.8189252     | 2.8061022     | 2.1284770     | 2.4991811     |
| 35.63                     | 467.09                | 478.85   | 412.06   | 449.76   | 35.63                  | 3.0538652     | 3.0882729     | 2.3392572     | 2.7275976     |
| 36.63                     | 489.25                | 491.86   | 426.52   | 470.1    | 36.63                  | 3.2461914     | 3.1993482     | 2.4564384     | 2.8961749     |
| 37.65                     | 499.4                 | 513.25   | 444.29   | 487.51   | 37.65                  | 3.3342831     | 3.3819694     | 2.6004431     | 3.0404685     |
| 38.65                     | 516.02                | 528.61   | 456.62   | 505.98   | 38.65                  | 3.4785278     | 3.5131083     | 2.7003631     | 3.1935473     |
| 39.65                     | 533.99                | 543.96   | 469.92   | 523.34   | 39.65                  | 3.6344891     | 3.6441619     | 2.8081438     | 3.3374265     |
| <b>Parameter</b>          |                       |          |          |          |                        |               |               |               |               |
| <b>a</b>                  | 418.51                | 429.73   | 352.9406 | 413.1889 |                        |               |               |               |               |
| <b>b</b>                  | 2.59                  | 2.54     | 2.607    | 2.725    |                        |               |               |               |               |
| <b>x0</b>                 | 31.01                 | 31.27    | 31.5584  | 31.7149  |                        |               |               |               |               |
| <b>y0</b>                 | 115.22                | 117.13   | 123.3987 | 120.66   |                        |               |               |               |               |
| <b>R</b>                  | 1.00                  | 0.999380 | 0.999430 | 0.999409 |                        |               |               |               |               |
| <b>CP<sub>(SDM)</sub></b> | 27.60                 | 27.92    | 28.12    | 28.13    |                        |               |               |               |               |

| G3           |                             |                             |                            | G4           |                             |                             |              |
|--------------|-----------------------------|-----------------------------|----------------------------|--------------|-----------------------------|-----------------------------|--------------|
| Well / Cycle | FAM Normalized Fluorescence | VIC Normalized Fluorescence | FSM predicted Fluorescence | Well / Cycle | FAM Normalized Fluorescence | VIC Normalized Fluorescence | Well / Cycle |
| 0.56         | -0.020838429                | -0.01082323                 | 2.08144E-05                | 0.56         | -0.0306293                  | -0.039536073                | 0.56         |
| 1.56         | -0.009980731                | -0.021153835                | 3.06849E-05                | 1.56         | -0.0105876                  | -0.028190735                | 1.56         |
| 2.56         | -0.025581215                | -0.021922227                | 4.53216E-05                | 2.56         | -0.0225059                  | -0.005905249                | 2.56         |
| 3.56         | -0.005416918                | -0.012360014                | 6.7026E-05                 | 3.56         | -0.0055066                  | -0.011010651                | 3.56         |
| 4.56         | -0.01642376                 | -0.023885895                | 9.92107E-05                | 4.56         | -0.0102739                  | -0.005013829                | 4.56         |
| 5.56         | -0.012665326                | -0.001944032                | 0.000146936                | 5.56         | -0.0034052                  | -0.00063777                 | 5.56         |
| 6.56         | -0.004879999                | 0.006764412                 | 0.000217705                | 6.56         | 0.0044045                   | 0.010221339                 | 6.56         |
| 7.56         | -0.000942591                | 0.024693561                 | 0.000322642                | 7.56         | 0.0105205                   | 0.006331509                 | 7.56         |
| 8.56         | 0.006872565                 | 0.031096829                 | 0.000478242                | 8.56         | 0.0086073                   | 0.012409369                 | 8.56         |
| 9.56         | -0.005118629                | 0.028535521                 | 0.000708954                | 9.56         | 0.0073841                   | 0.00454867                  | 9.56         |
| 10.56        | 0.007976232                 | 0.025888838                 | 0.00105102                 | 10.56        | 0.0172951                   | 0.001712336                 | 10.56        |
| 11.56        | 0.004038825                 | 0.03767085                  | 0.001558149                | 11.56        | 0.0082622                   | 0.022296021                 | 11.56        |
| 12.56        | 0.017014372                 | 0.020339339                 | 0.002309907                | 12.56        | 0.0170128                   | 0.015488818                 | 12.56        |
| 13.56        | 0.022383563                 | 0.033914266                 | 0.003424111                | 13.56        | 0.0206197                   | 0.026591042                 | 13.56        |
| 14.56        | 0.015493101                 | 0.023839792                 | 0.005075105                | 14.56        | 0.0239443                   | 0.032912016                 | 14.56        |
| 15.56        | 0.019967427                 | 0.018887932                 | 0.007520607                | 15.56        | 0.0274885                   | 0.033965512                 | 15.56        |
| 16.58        | 0.00391951                  | 0.027852506                 | 0.011228872                | 16.58        | 0.0354236                   | 0.033641359                 | 16.58        |
| 17.58        | 0.013763028                 | 0.029986929                 | 0.016626404                | 17.58        | 0.0282412                   | 0.047336803                 | 17.58        |
| 18.58        | 0.019609481                 | 0.035792558                 | 0.024601077                | 18.58        | 0.0351413                   | 0.036072503                 | 18.58        |
| 19.58        | 0.034881848                 | 0.046976932                 | 0.036362717                | 19.58        | 0.0419159                   | 0.039314028                 | 19.58        |
| 20.58        | 0.027722926                 | 0.059356583                 | 0.053664813                | 20.58        | 0.0340749                   | 0.043122821                 | 20.58        |
| 21.58        | 0.01758112                  | 0.063796181                 | 0.079020578                | 21.58        | 0.0198042                   | 0.056413074                 | 21.58        |
| 22.58        | 0.019579652                 | 0.092738951                 | 0.115972306                | 22.58        | 0.0293389                   | 0.059006294                 | 22.58        |
| 23.58        | 0.023129284                 | 0.106826139                 | 0.169388208                | 23.58        | 0.0290567                   | 0.101956504                 | 23.58        |
| 24.58        | 0.019132219                 | 0.193654447                 | 0.245705671                | 24.58        | 0.0278648                   | 0.132994108                 | 24.58        |
| 25.58        | 0.028856422                 | 0.261955968                 | 0.35294001                 | 25.58        | 0.0421669                   | 0.208521646                 | 25.58        |
| 26.58        | 0.034374758                 | 0.472580781                 | 0.500137397                | 26.58        | 0.0482201                   | 0.331942719                 | 26.58        |
| 27.58        | 0.040221211                 | 0.6373582                   | 0.695842481                | 27.58        | 0.0560925                   | 0.465898749                 | 27.58        |
| 28.56        | 0.058744922                 | 0.979548817                 | 0.939763667                | 28.56        | 0.0576294                   | 0.702530091                 | 28.56        |
| 29.61        | 0.06960262                  | 1.316958328                 | 1.256392491                | 29.61        | 0.0848221                   | 0.97400783                  | 29.61        |
| 30.56        | 0.105814834                 | 1.651550402                 | 1.58097261                 | 30.56        | 0.1059928                   | 1.228872751                 | 30.56        |
| 31.63        | 0.109125836                 | 2.04880912                  | 1.965788881                | 31.63        | 0.1050519                   | 1.488032694                 | 31.63        |
| 32.63        | 0.150259809                 | 2.308440275                 | 2.315858486                | 32.63        | 0.1441943                   | 1.720450053                 | 32.63        |
| 33.63        | 0.168097457                 | 2.584549172                 | 2.631928566                | 33.63        | 0.1574300                   | 1.9447636                   | 33.63        |
| 34.63        | 0.213168837                 | 2.806102229                 | 2.898718312                | 34.63        | 0.1801376                   | 2.128477042                 | 34.63        |
| 35.63        | 0.227934114                 | 3.088272885                 | 3.111406587                | 35.63        | 0.1945651                   | 2.339257221                 | 35.63        |
| 36.63        | 0.278643146                 | 3.199348233                 | 3.273372924                | 36.63        | 0.2343662                   | 2.456438358                 | 36.63        |
| 37.65        | 0.308382501                 | 3.381969423                 | 3.394470095                | 37.65        | 0.2575442                   | 2.600443116                 | 37.65        |
| 38.65        | 0.354945324                 | 3.513108342                 | 3.479209696                | 38.65        | 0.2777741                   | 2.700363132                 | 38.65        |
| 39.65        | 0.398167316                 | 3.644161885                 | 3.538784173                | 39.65        | 0.3083855                   | 2.808143846                 | 39.65        |

| Experiment derived linear regression parameters |                  |
|-------------------------------------------------|------------------|
| parameter                                       | value            |
| y0                                              | -0.0088          |
| a                                               | 0.0647           |
| <b>R</b>                                        | <b>0.9580485</b> |

| Experiment derived linear regression parameters |                  |
|-------------------------------------------------|------------------|
| parameter                                       | value            |
| y0                                              | 0.0071           |
| a                                               | 0.0756           |
| <b>R</b>                                        | <b>0.9595011</b> |

| Experiment derived parameters |       |
|-------------------------------|-------|
| parameter                     | value |
| y0                            |       |
| a                             |       |
| <b>R</b>                      |       |
| average                       |       |

**G5**

| FAM Normalized Fluorescence | VIC Normalized Fluorescence |
|-----------------------------|-----------------------------|
| -0.017243818                | -0.032130804                |
| -0.016214477                | -0.027323781                |
| -0.027537231                | -0.023428435                |
| -0.009185547                | -0.02492027                 |
| -0.017596735                | -0.01348287                 |
| -0.007156274                | 0.001103958                 |
| 0.000784358                 | 0.002098514                 |
| 0.008930859                 | 0.005247943                 |
| 0.014342252                 | 0.016602463                 |
| 0.007460371                 | 0.010220725                 |
| 0.02516504                  | 0.012624237                 |
| 0.015077496                 | 0.023978756                 |
| 0.030458795                 | 0.02306708                  |
| 0.03337036                  | 0.027791223                 |
| 0.028782439                 | 0.047185074                 |
| 0.025988513                 | 0.044532923                 |
| 0.026694347                 | 0.049754345                 |
| 0.03813474                  | 0.043538367                 |
| 0.045693045                 | 0.043704126                 |
| 0.041134534                 | 0.057047759                 |
| 0.045487177                 | 0.051494818                 |
| 0.042634431                 | 0.079342399                 |
| 0.039722866                 | 0.100476724                 |
| 0.042457973                 | 0.117549943                 |
| 0.041458041                 | 0.186091459                 |
| 0.041399222                 | 0.246510764                 |
| 0.053751316                 | 0.412933212                 |
| 0.07910252                  | 0.571979366                 |
| 0.071220708                 | 0.827083099                 |
| 0.09204281                  | 1.153546257                 |
| 0.117423424                 | 1.452576233                 |
| 0.12604048                  | 1.714061702                 |
| 0.156920717                 | 1.967922239                 |
| 0.171184445                 | 2.294468277                 |
| 0.203917496                 | 2.499181149                 |
| 0.232150856                 | 2.727597616                 |
| 0.273000997                 | 2.896174936                 |
| 0.301410815                 | 3.040468502                 |
| 0.340319913                 | 3.193547318                 |
| 0.351760306                 | 3.337426486                 |

**Experiment derived linear regression**

value

0.0102

0.0721

**0.989111**

| parameter | value   |
|-----------|---------|
| y0        | 0.0065  |
| a         | 0.06815 |
| R         |         |

| Well /                    | Raw fluorescence data |           |           |           | Well / | C6Normalized | C7Normalized | C8Normalized | C9 Normalized |
|---------------------------|-----------------------|-----------|-----------|-----------|--------|--------------|--------------|--------------|---------------|
| Cycle                     | C6 sample             | C7 sample | C8 sample | C9 sample | Cycle  | Fluorescence | Fluorescence | Fluorescence | Fluorescence  |
| 0.56                      | 147.96                | 139.51    | 131.34    | 127.01    | 0.56   | -0.0227826   | -0.0395954   | -0.0173641   | -0.0091695    |
| 1.56                      | 147.05                | 142.86    | 128.95    | 125.66    | 1.56   | -0.0287928   | -0.0165336   | -0.0352452   | -0.0197012    |
| 2.56                      | 146.77                | 141.24    | 131.9     | 125.73    | 2.56   | -0.0306421   | -0.0276859   | -0.0131744   | -0.0191551    |
| 3.56                      | 147.58                | 144.75    | 130.33    | 125.98    | 3.56   | -0.0252923   | -0.0035226   | -0.0249205   | -0.0172048    |
| 4.56                      | 148.69                | 143.27    | 131.25    | 127.28    | 4.56   | -0.0179612   | -0.0137111   | -0.0180374   | -0.0070632    |
| 5.56                      | 152.21                | 145.64    | 132.85    | 127.71    | 5.56   | 0.0052870    | 0.0026043    | -0.0060668   | -0.0037087    |
| 6.56                      | 150.25                | 142.94    | 135.11    | 128.19    | 6.56   | -0.0076580   | -0.0159829   | 0.0108416    | 0.0000359     |
| 7.56                      | 153.87                | 144.46    | 133.64    | 129.62    | 7.56   | 0.0162506    | -0.0055190   | -0.0001564   | 0.0111916     |
| 8.56                      | 152.48                | 147.52    | 136.78    | 127.7     | 8.56   | 0.0070702    | 0.0155464    | 0.0233359    | -0.0037867    |
| 9.56                      | 152.48                | 145.83    | 132.69    | 127.12    | 9.56   | 0.0070702    | 0.0039122    | -0.0072639   | -0.0083114    |
| 10.56                     | 152.33                | 144.5     | 136.39    | 131.28    | 10.56  | 0.0060795    | -0.0052436   | 0.0204181    | 0.0241416     |
| 11.56                     | 155.19                | 147.22    | 137.58    | 130.23    | 11.56  | 0.0249687    | 0.0134812    | 0.0293212    | 0.0159503     |
| 12.56                     | 153.53                | 148.16    | 135.25    | 130.81    | 12.56  | 0.0140051    | 0.0199523    | 0.0118890    | 0.0204750     |
| 13.56                     | 153.78                | 146.73    | 137.89    | 131.67    | 13.56  | 0.0156562    | 0.0101080    | 0.0316405    | 0.0271841     |
| 14.56                     | 155.37                | 149.42    | 135.63    | 131.24    | 14.56  | 0.0261575    | 0.0286263    | 0.0147321    | 0.0238295     |
| 15.56                     | 154.13                | 147.36    | 135.92    | 131.5     | 15.56  | 0.0179678    | 0.0144450    | 0.0169017    | 0.0258579     |
| 16.58                     | 156.04                | 150.33    | 136.81    | 131.84    | 16.58  | 0.0305826    | 0.0348908    | 0.0235604    | 0.0285103     |
| 17.58                     | 157.47                | 152.43    | 137.26    | 130.38    | 17.58  | 0.0400272    | 0.0493475    | 0.0269271    | 0.0171205     |
| 18.58                     | 157.24                | 151.65    | 139.27    | 130.87    | 18.58  | 0.0385082    | 0.0439779    | 0.0419652    | 0.0209431     |
| 19.58                     | 156.87                | 151.25    | 137.47    | 131.14    | 19.58  | 0.0360644    | 0.0412242    | 0.0284982    | 0.0230494     |
| 20.58                     | 155.03                | 154.03    | 136.87    | 131.04    | 20.58  | 0.0239120    | 0.0603621    | 0.0240093    | 0.0222693     |
| 21.58                     | 160.05                | 152.08    | 140.03    | 132.36    | 21.58  | 0.0570671    | 0.0469380    | 0.0476512    | 0.0325669     |
| 22.58                     | 163.51                | 155.46    | 140.48    | 133.32    | 22.58  | 0.0799190    | 0.0702064    | 0.0510179    | 0.0400560     |
| 23.58                     | 163.45                | 155.98    | 143.38    | 136.71    | 23.58  | 0.0795228    | 0.0737861    | 0.0727146    | 0.0665021     |
| 24.58                     | 166.07                | 160.02    | 145.37    | 137.41    | 24.58  | 0.0968268    | 0.1015980    | 0.0876030    | 0.0719630     |
| 25.58                     | 166.83                | 161.66    | 147.17    | 140.2     | 25.58  | 0.1018463    | 0.1128880    | 0.1010699    | 0.0937283     |
| 26.58                     | 174.19                | 164.99    | 149.77    | 144.15    | 26.58  | 0.1504562    | 0.1358121    | 0.1205222    | 0.1245430     |
| 27.58                     | 181.74                | 171.91    | 156.55    | 146.48    | 27.58  | 0.2003210    | 0.1834503    | 0.1712475    | 0.1427198     |
| 28.56                     | 191.42                | 183.49    | 166.28    | 155.78    | 28.56  | 0.2642536    | 0.2631685    | 0.2440437    | 0.2152710     |
| 29.61                     | 205.5                 | 193.83    | 180.05    | 165.26    | 29.61  | 0.3572464    | 0.3343503    | 0.3470656    | 0.2892264     |
| 30.56                     | 221.28                | 209.49    | 188.95    | 178.31    | 30.56  | 0.4614671    | 0.4421558    | 0.4136520    | 0.3910321     |
| 31.63                     | 241.39                | 222.85    | 203.35    | 188.62    | 31.63  | 0.5942857    | 0.5341277    | 0.5213873    | 0.4714624     |
| 32.63                     | 258.02                | 238.25    | 215.32    | 198.17    | 32.63  | 0.7041203    | 0.6401433    | 0.6109423    | 0.5459639     |
| 33.63                     | 278.22                | 251.76    | 232.64    | 211.08    | 33.63  | 0.8375333    | 0.7331478    | 0.7405240    | 0.6466774     |
| 34.63                     | 293.39                | 267.08    | 246.49    | 221.4     | 34.63  | 0.9377252    | 0.8386127    | 0.8441444    | 0.7271858     |
| 35.63                     | 320.68                | 288.91    | 258.52    | 235.25    | 35.63  | 1.1179649    | 0.9888931    | 0.9341483    | 0.8352324     |
| 36.63                     | 335.5                 | 306.52    | 276.29    | 248.03    | 36.63  | 1.2158451    | 1.1101226    | 1.0670967    | 0.9349317     |
| 37.65                     | 359.88                | 319.48    | 289.53    | 260.09    | 37.65  | 1.3768654    | 1.1993409    | 1.1661533    | 1.0290142     |
| 38.65                     | 380.84                | 338.23    | 308.46    | 276.86    | 38.65  | 1.5152979    | 1.3284183    | 1.3077804    | 1.1598404     |
| 39.65                     | 401.27                | 355.96    | 322.95    | 287.84    | 39.65  | 1.6502300    | 1.4504739    | 1.4161890    | 1.2454975     |
| <b>a</b>                  | 321.03                | 274.33    | 239.42    | 202.70    |        |              |              |              |               |
| <b>b</b>                  | 3.62                  | 3.77      | 3.64      | 3.66      |        |              |              |              |               |
| <b>x0</b>                 | 35.32                 | 35.33     | 35.10     | 35.10     |        |              |              |              |               |
| <b>y0</b>                 | 151.41                | 145.26    | 133.66    | 128.19    |        |              |              |              |               |
| <b>R</b>                  | 1.00                  | 1.00      | 1.00      | 1.00      |        |              |              |              |               |
| <b>CP<sub>(SDM)</sub></b> | 30.56                 | 30.36     | 30.31     | 30.29     |        |              |              |              |               |

| Well /<br>Cycle           | C2     | C3      | C4     | C5     | Well /<br>Cycle | Fluorescence Data Normalized To Y0 |       |       |       |
|---------------------------|--------|---------|--------|--------|-----------------|------------------------------------|-------|-------|-------|
|                           |        |         |        |        |                 | C2                                 | C3    | C4    | C5    |
| 0.56                      | 138.68 | 137.43  | 146.68 | 138.65 | 0.56            | -0.03                              | -0.03 | -0.02 | -0.02 |
| 1.56                      | 138.01 | 138.33  | 147.15 | 138.77 | 1.56            | -0.04                              | -0.03 | -0.02 | -0.02 |
| 2.56                      | 142.8  | 139.7   | 149.24 | 140.69 | 2.56            | 0.00                               | -0.02 | -0.01 | -0.01 |
| 3.56                      | 141.3  | 140.17  | 148.16 | 139.25 | 3.56            | -0.01                              | -0.01 | -0.01 | -0.02 |
| 4.56                      | 142.57 | 142.24  | 149.03 | 140.38 | 4.56            | -0.01                              | 0.00  | -0.01 | -0.01 |
| 5.56                      | 142.4  | 141.37  | 150.8  | 140.04 | 5.56            | -0.01                              | -0.01 | 0.00  | -0.01 |
| 6.56                      | 144.08 | 141.85  | 150.68 | 141.05 | 6.56            | 0.01                               | 0.00  | 0.00  | 0.00  |
| 7.56                      | 145.4  | 141.72  | 151.9  | 140.82 | 7.56            | 0.01                               | 0.00  | 0.01  | 0.00  |
| 8.56                      | 145.18 | 142.46  | 150.1  | 142.56 | 8.56            | 0.01                               | 0.00  | 0.00  | 0.01  |
| 9.56                      | 146.61 | 143.55  | 153.72 | 142.91 | 9.56            | 0.02                               | 0.01  | 0.02  | 0.01  |
| 10.56                     | 146.06 | 143.01  | 151.08 | 141.69 | 10.56           | 0.02                               | 0.01  | 0.01  | 0.00  |
| 11.56                     | 147.43 | 144.98  | 151.98 | 143.88 | 11.56           | 0.03                               | 0.02  | 0.01  | 0.02  |
| 12.56                     | 148.04 | 143.89  | 152.04 | 143.35 | 12.56           | 0.03                               | 0.01  | 0.01  | 0.01  |
| 13.56                     | 147.73 | 144.41  | 150.82 | 141.93 | 13.56           | 0.03                               | 0.02  | 0.00  | 0.00  |
| 14.56                     | 146.43 | 144.07  | 152.91 | 144.81 | 14.56           | 0.02                               | 0.01  | 0.02  | 0.02  |
| 15.56                     | 149.78 | 148.34  | 152.03 | 144.93 | 15.56           | 0.04                               | 0.04  | 0.01  | 0.02  |
| 16.58                     | 151.77 | 146.29  | 152.39 | 146.16 | 16.58           | 0.06                               | 0.03  | 0.01  | 0.03  |
| 17.58                     | 149.12 | 147.88  | 151.51 | 146.08 | 17.58           | 0.04                               | 0.04  | 0.01  | 0.03  |
| 18.58                     | 147.92 | 146.71  | 153    | 145.93 | 18.58           | 0.03                               | 0.03  | 0.02  | 0.03  |
| 19.58                     | 150.02 | 148.26  | 153.94 | 146.82 | 19.58           | 0.05                               | 0.04  | 0.03  | 0.04  |
| 20.58                     | 149.02 | 149.04  | 154.3  | 146.83 | 20.58           | 0.04                               | 0.05  | 0.03  | 0.04  |
| 21.58                     | 154.16 | 148.15  | 154.16 | 148.8  | 21.58           | 0.08                               | 0.04  | 0.03  | 0.05  |
| 22.58                     | 153.62 | 149.39  | 158.15 | 150.27 | 22.58           | 0.07                               | 0.05  | 0.05  | 0.06  |
| 23.58                     | 155.06 | 152.53  | 155.6  | 150.51 | 23.58           | 0.08                               | 0.07  | 0.04  | 0.06  |
| 24.58                     | 156.89 | 154.94  | 158.71 | 152.74 | 24.58           | 0.09                               | 0.09  | 0.06  | 0.08  |
| 25.58                     | 155.65 | 154.11  | 159.27 | 154.05 | 25.58           | 0.09                               | 0.08  | 0.06  | 0.09  |
| 26.58                     | 158.74 | 156.04  | 164.21 | 156.11 | 26.58           | 0.11                               | 0.10  | 0.09  | 0.10  |
| 27.58                     | 162.55 | 161.98  | 168.21 | 161.2  | 27.58           | 0.13                               | 0.14  | 0.12  | 0.14  |
| 28.56                     | 166.51 | 166.14  | 173.93 | 165.33 | 28.56           | 0.16                               | 0.17  | 0.16  | 0.17  |
| 29.61                     | 170.92 | 172.92  | 178.45 | 172.73 | 29.61           | 0.19                               | 0.22  | 0.19  | 0.22  |
| 30.56                     | 176.89 | 180.88  | 183.27 | 181.66 | 30.56           | 0.23                               | 0.27  | 0.22  | 0.28  |
| 31.63                     | 183.68 | 186.79  | 194.63 | 190.23 | 31.63           | 0.28                               | 0.31  | 0.30  | 0.34  |
| 32.63                     | 189.38 | 198.34  | 200.35 | 198.22 | 32.63           | 0.32                               | 0.39  | 0.33  | 0.40  |
| 33.63                     | 192.48 | 207.17  | 213    | 207.95 | 33.63           | 0.34                               | 0.46  | 0.42  | 0.47  |
| 34.63                     | 199.48 | 214.46  | 221.03 | 213.82 | 34.63           | 0.39                               | 0.51  | 0.47  | 0.51  |
| 35.63                     | 207.7  | 229.88  | 235.3  | 226.15 | 35.63           | 0.45                               | 0.62  | 0.57  | 0.60  |
| 36.63                     | 215.67 | 238.74  | 246.97 | 236.26 | 36.63           | 0.50                               | 0.68  | 0.64  | 0.67  |
| 37.65                     | 217.67 | 246.29  | 259.05 | 248.96 | 37.65           | 0.52                               | 0.73  | 0.72  | 0.76  |
| 38.65                     | 229.03 | 262.18  | 271.35 | 257.14 | 38.65           | 0.60                               | 0.84  | 0.81  | 0.82  |
| 39.65                     | 236.92 | 273.44  | 286.27 | 269    | 39.65           | 0.65                               | 0.92  | 0.91  | 0.90  |
| <b>Parameter</b>          |        |         |        |        |                 |                                    |       |       |       |
| <b>a</b>                  | 189.98 | 210.04  | 213.82 | 187.87 |                 |                                    |       |       |       |
| <b>b</b>                  | 5.9579 | 4.5038  | 4.1506 | 4.3622 |                 |                                    |       |       |       |
| <b>x0</b>                 | 39.832 | 37.4031 | 37.43  | 36.468 |                 |                                    |       |       |       |
| <b>y0</b>                 | 143.33 | 142.187 | 150.18 | 141.47 |                 |                                    |       |       |       |
| <b>R</b>                  | 0.9964 | 0.99846 | 0.9992 | 0.999  |                 |                                    |       |       |       |
| <b>CP<sub>(SDM)</sub></b> | 31.99  | 31.47   | 31.96  | 30.72  |                 |                                    |       |       |       |

| C2                                   |                                |                                | C3                                   |                                |                                |                                      |       |  |
|--------------------------------------|--------------------------------|--------------------------------|--------------------------------------|--------------------------------|--------------------------------|--------------------------------------|-------|--|
| Well /<br>Cycle                      | FAM Normalized<br>Fluorescence | VIC Normalized<br>Fluorescence | Well /<br>Cycle                      | FAM Normalized<br>Fluorescence | VIC Normalized<br>Fluorescence | Well /<br>Cycle                      |       |  |
| 0.56                                 | -0.032074496                   | -0.032451391                   | 0.56                                 | -0.041460569                   | -0.033453223                   | 0.56                                 |       |  |
| 1.56                                 | -0.033367822                   | -0.037125876                   | 1.56                                 | -0.019622025                   | -0.027123512                   | 1.56                                 |       |  |
| 2.56                                 | -0.034609415                   | -0.003706797                   | 2.56                                 | -0.025221652                   | -0.017488287                   | 2.56                                 |       |  |
| 3.56                                 | -0.012648733                   | -0.014172062                   | 3.56                                 | -0.005412972                   | -0.014182771                   | 3.56                                 |       |  |
| 4.56                                 | -0.019917227                   | -0.005311471                   | 4.56                                 | -0.012482501                   | 0.000375563                    | 4.56                                 |       |  |
| 5.56                                 | -0.01624418                    | -0.006497534                   | 5.56                                 | -0.015538964                   | -0.005743157                   | 5.56                                 |       |  |
| 6.56                                 | 0.005354371                    | 0.005223562                    | 6.56                                 | 0.01129258                     | -0.002367312                   | 6.56                                 |       |  |
| 7.56                                 | -0.010294878                   | 0.014432995                    | 7.56                                 | -0.005482968                   | -0.003281603                   | 7.56                                 |       |  |
| 8.56                                 | 0.01929643                     | 0.01289809                     | 8.56                                 | 0.016915539                    | 0.001922825                    | 8.56                                 |       |  |
| 9.56                                 | 0.010320745                    | 0.022874976                    | 9.56                                 | 0.000349977                    | 0.009588808                    | 9.56                                 |       |  |
| 10.56                                | 0.032514227                    | 0.019037712                    | 10.56                                | 0.016612226                    | 0.005790982                    | 10.56                                |       |  |
| 11.56                                | 0.010320745                    | 0.028595987                    | 11.56                                | 0.012435838                    | 0.019646014                    | 11.56                                |       |  |
| 12.56                                | 0.037713399                    | 0.032851861                    | 12.56                                | 0.026341577                    | 0.011980032                    | 12.56                                |       |  |
| 13.56                                | 0.016606311                    | 0.03068904                     | 13.56                                | 0.034507699                    | 0.015637198                    | 13.56                                |       |  |
| 14.56                                | 0.028220383                    | 0.021619144                    | 14.56                                | 0.025501633                    | 0.013245974                    | 14.56                                |       |  |
| 15.56                                | 0.039006725                    | 0.044991568                    | 15.56                                | 0.02769482                     | 0.043276933                    | 15.56                                |       |  |
| 16.58                                | 0.030108639                    | 0.058875486                    | 16.58                                | 0.031637891                    | 0.02885926                     | 16.58                                |       |  |
| 17.58                                | 0.039161924                    | 0.040386852                    | 17.58                                | 0.050489967                    | 0.040041748                    | 17.58                                |       |  |
| 18.58                                | 0.043688567                    | 0.03201464                     | 18.58                                | 0.040597294                    | 0.031813124                    | 18.58                                |       |  |
| 19.58                                | 0.047982411                    | 0.046666011                    | 19.58                                | 0.03989734                     | 0.042714292                    | 19.58                                |       |  |
| 20.58                                | 0.038929126                    | 0.039689168                    | 20.58                                | 0.043000467                    | 0.048200041                    | 20.58                                |       |  |
| 21.58                                | 0.032643559                    | 0.075550142                    | 21.58                                | 0.03320112                     | 0.041940661                    | 21.58                                |       |  |
| 22.58                                | 0.055225039                    | 0.071782646                    | 22.58                                | 0.042067196                    | 0.050661595                    | 22.58                                |       |  |
| 23.58                                | 0.059958614                    | 0.0818293                      | 23.58                                | 0.062459169                    | 0.072745252                    | 23.58                                |       |  |
| 24.58                                | 0.069529229                    | 0.094596923                    | 24.58                                | 0.090713952                    | 0.089694809                    | 24.58                                |       |  |
| 25.58                                | 0.122038282                    | 0.085945638                    | 25.58                                | 0.128301447                    | 0.08385741                     | 25.58                                |       |  |
| 26.58                                | 0.152431454                    | 0.107504083                    | 26.58                                | 0.166938871                    | 0.097431122                    | 26.58                                |       |  |
| 27.58                                | 0.246844283                    | 0.134085856                    | 27.58                                | 0.294423705                    | 0.139207211                    | 27.58                                |       |  |
| 28.56                                | 0.305768236                    | 0.161714155                    | 28.56                                | 0.354363042                    | 0.168464539                    | 28.56                                |       |  |
| 29.61                                | 0.411433006                    | 0.192482033                    | 29.61                                | 0.491413906                    | 0.216148357                    | 29.61                                |       |  |
| 30.56                                | 0.525866529                    | 0.234133787                    | 30.56                                | 0.645496967                    | 0.272131129                    | 30.56                                |       |  |
| 31.63                                | 0.620331092                    | 0.281506552                    | 31.63                                | 0.757559496                    | 0.313696227                    | 31.63                                |       |  |
| 32.63                                | 0.718313502                    | 0.321274558                    | 32.63                                | 0.924311713                    | 0.394927511                    | 32.63                                |       |  |
| 33.63                                | 0.798473875                    | 0.342902771                    | 33.63                                | 1.017778815                    | 0.457029003                    | 33.63                                |       |  |
| 34.63                                | 0.902172788                    | 0.391740674                    | 34.63                                | 1.155226318                    | 0.508299657                    | 34.63                                |       |  |
| 35.63                                | 0.970098293                    | 0.449090324                    | 35.63                                | 1.258819412                    | 0.616748695                    | 35.63                                |       |  |
| 36.63                                | 1.092395241                    | 0.504695764                    | 36.63                                | 1.418758749                    | 0.679061177                    | 36.63                                |       |  |
| 37.65                                | 1.165804449                    | 0.518649451                    | 37.65                                | 1.525758283                    | 0.732160415                    | 37.65                                |       |  |
| 38.65                                | 1.274728401                    | 0.597906389                    | 38.65                                | 1.642417172                    | 0.843914968                    | 38.65                                |       |  |
| 39.65                                | 1.327651319                    | 0.652953681                    | 39.65                                | 1.721721885                    | 0.923106678                    | 39.65                                |       |  |
| Experiment derived linear regression |                                |                                | Experiment derived linear regression |                                |                                | Experiment derived linear regression |       |  |
| parameter                            | value                          |                                | parameter                            | value                          |                                | parameter                            | value |  |
| y0                                   | -0.1071                        |                                | y0                                   | -0.0788                        |                                | y0                                   |       |  |
| a                                    | 2.6077                         |                                | a                                    | 2.6058                         |                                | a                                    |       |  |
| R                                    | 0.99771781                     |                                | R                                    | 0.9985567                      |                                | R                                    |       |  |

## C4

## C5

| FAM Normalized Fluorescence | VIC Normalized Fluorescence | Well / Cycle | FAM Normalized Fluorescence | VIC Normalized Fluorescence |
|-----------------------------|-----------------------------|--------------|-----------------------------|-----------------------------|
| -0.023954295                | -0.023315772                | 0.56         | -0.018345399                | -0.019910693                |
| -0.004570496                | -0.020186228                | 1.56         | -0.002648123                | -0.019062437                |
| -0.022097531                | -0.006269743                | 2.56         | -0.027050465                | -0.005490338                |
| -0.009324628                | -0.013461037                | 3.56         | -0.004314053                | -0.015669412                |
| -0.001305856                | -0.00766805                 | 4.56         | -0.019659371                | -0.007681666                |
| -0.004856152                | 0.004117682                 | 5.56         | -0.006848142                | -0.010085059                |
| 0.013099367                 | 0.003318649                 | 6.56         | 0.000683735                 | -0.00294557                 |
| 0.005529484                 | 0.011442147                 | 7.56         | -0.008115187                | -0.004571394                |
| 0.017914711                 | -0.000543342                | 8.56         | 0.002842404                 | 0.007728321                 |
| 0.005325444                 | 0.023560809                 | 9.56         | 0.0036871                   | 0.010202401                 |
| 0.022791267                 | 0.005982091                 | 10.56        | 0.016639112                 | 0.001578463                 |
| 0.002611712                 | 0.011974836                 | 11.56        | 0.009154163                 | 0.017059138                 |
| 0.026361967                 | 0.012374352                 | 12.56        | 0.027925196                 | 0.013312674                 |
| 0.034911243                 | 0.004250854                 | 13.56        | 0.021660364                 | 0.003274976                 |
| 0.026361967                 | 0.018167339                 | 14.56        | 0.028981066                 | 0.023633124                 |
| 0.024382779                 | 0.012307766                 | 15.56        | 0.034049245                 | 0.02448138                  |
| 0.027076107                 | 0.014704864                 | 16.58        | 0.036630262                 | 0.033176005                 |
| 0.030299939                 | 0.008845291                 | 17.58        | 0.037779988                 | 0.032610501                 |
| 0.030932463                 | 0.018766613                 | 18.58        | 0.048761041                 | 0.031550181                 |
| 0.03770659                  | 0.025025702                 | 19.58        | 0.055401294                 | 0.037841414                 |
| 0.034645991                 | 0.0274228                   | 20.58        | 0.056785658                 | 0.037912102                 |
| 0.018077943                 | 0.026490595                 | 21.58        | 0.027221282                 | 0.051837641                 |
| 0.031014079                 | 0.053058431                 | 22.58        | 0.043223587                 | 0.062228779                 |
| 0.065211181                 | 0.036078987                 | 23.58        | 0.064904129                 | 0.063925291                 |
| 0.06208937                  | 0.05678725                  | 24.58        | 0.088250601                 | 0.079688718                 |
| 0.117384207                 | 0.060516069                 | 25.58        | 0.124713331                 | 0.088948848                 |
| 0.178086105                 | 0.093409579                 | 26.58        | 0.176779482                 | 0.103510579                 |
| 0.269700061                 | 0.120044                    | 27.58        | 0.293277202                 | 0.139490778                 |
| 0.363007549                 | 0.158131222                 | 28.56        | 0.344569048                 | 0.168684927                 |
| 0.509018568                 | 0.188228118                 | 29.61        | 0.486384197                 | 0.220994057                 |
| 0.660395838                 | 0.220322596                 | 30.56        | 0.622380326                 | 0.284118453                 |
| 0.79775556                  | 0.295964352                 | 31.63        | 0.738924974                 | 0.344698081                 |
| 0.951805754                 | 0.334051575                 | 32.63        | 0.888623957                 | 0.401177804                 |
| 1.056967966                 | 0.418282932                 | 33.63        | 0.994750681                 | 0.469957241                 |
| 1.222709651                 | 0.471751533                 | 34.63        | 1.141610545                 | 0.511451105                 |
| 1.30948786                  | 0.566769831                 | 35.63        | 1.222443303                 | 0.598609425                 |
| 1.493389104                 | 0.644475755                 | 36.63        | 1.394339032                 | 0.670075007                 |
| 1.635074475                 | 0.724911707                 | 37.65        | 1.48817073                  | 0.759848784                 |
| 1.766721077                 | 0.806812552                 | 38.65        | 1.6580955                   | 0.817671579                 |
| 1.834584779                 | 0.906158944                 | 39.65        | 1.734775168                 | 0.901507563                 |

Experiment derived linear regressi

value

-0.0929

3.1214

0.9985567

Experiment derived linear regressi

parameter

value

y0

-0.0602

a

2.3734

R

0.9978818

AVERAGE

parameter value

y0

-0.08475

a

2.677075

| Well /<br>Cycle           | Raw fluorescence data |          |          |          | Well /<br>Cycle | C6Normalized<br>Fluorescence | C7Normalized<br>Fluorescence | C8Normalized<br>Fluorescence | C9 Normalized<br>Fluorescence |
|---------------------------|-----------------------|----------|----------|----------|-----------------|------------------------------|------------------------------|------------------------------|-------------------------------|
|                           | 6 sample              | 7 sample | 8 sample | 9 sample |                 |                              |                              |                              |                               |
| 0.56                      | 444.3                 | 423.16   | 413.83   | 381.41   | 0.56            | -0.0256453                   | -0.0211554                   | -0.0274170                   | 0.0019716                     |
| 1.56                      | 451.65                | 426.14   | 417.83   | 379.73   | 1.56            | -0.0095267                   | -0.0142621                   | -0.0180162                   | -0.0024418                    |
| 2.56                      | 443.32                | 419.58   | 417.27   | 380.07   | 2.56            | -0.0277944                   | -0.0294366                   | -0.0193323                   | -0.0015486                    |
| 3.56                      | 451.49                | 425.16   | 422.5    | 379.46   | 3.56            | -0.0098775                   | -0.0165290                   | -0.0070407                   | -0.0031511                    |
| 4.56                      | 448.2                 | 426.9    | 422.79   | 381.9    | 4.56            | -0.0170925                   | -0.0125041                   | -0.0063592                   | 0.0032588                     |
| 5.56                      | 448.46                | 430.08   | 419.73   | 381.1    | 5.56            | -0.0165224                   | -0.0051482                   | -0.0135508                   | 0.0011572                     |
| 6.56                      | 458.6                 | 433.96   | 426.84   | 384.02   | 6.56            | 0.0057148                    | 0.0038269                    | 0.0031591                    | 0.0088281                     |
| 7.56                      | 453.72                | 430.95   | 425.42   | 380.78   | 7.56            | -0.0049871                   | -0.0031357                   | -0.0001781                   | 0.0003166                     |
| 8.56                      | 461.68                | 442      | 431.54   | 386.35   | 8.56            | 0.0124692                    | 0.0224249                    | 0.0142051                    | 0.0149491                     |
| 9.56                      | 460.21                | 434.79   | 429.8    | 384.7    | 9.56            | 0.0092455                    | 0.0057469                    | 0.0101157                    | 0.0106145                     |
| 10.56                     | 464.49                | 442.48   | 433.44   | 388.92   | 10.56           | 0.0186316                    | 0.0235352                    | 0.0186705                    | 0.0217005                     |
| 11.56                     | 461.69                | 440.39   | 433.01   | 383.36   | 11.56           | 0.0124912                    | 0.0187007                    | 0.0176599                    | 0.0070943                     |
| 12.56                     | 466.37                | 441.57   | 440.85   | 385.84   | 12.56           | 0.0227545                    | 0.0214302                    | 0.0360854                    | 0.0136093                     |
| 13.56                     | 467.91                | 444.2    | 434.85   | 386.08   | 13.56           | 0.0261317                    | 0.0275139                    | 0.0219842                    | 0.0142398                     |
| 14.56                     | 471.68                | 449.07   | 437.91   | 389.92   | 14.56           | 0.0343993                    | 0.0387790                    | 0.0291758                    | 0.0243275                     |
| 15.56                     | 469.35                | 444.58   | 436.06   | 383.12   | 15.56           | 0.0292896                    | 0.0283929                    | 0.0248280                    | 0.0064638                     |
| 16.58                     | 466.14                | 441.28   | 437.96   | 387.29   | 16.58           | 0.0222501                    | 0.0207594                    | 0.0292934                    | 0.0174185                     |
| 17.58                     | 469.86                | 445.42   | 441.13   | 391.1    | 17.58           | 0.0304081                    | 0.0303359                    | 0.0367435                    | 0.0274274                     |
| 18.58                     | 473.39                | 448.77   | 438.77   | 390.68   | 18.58           | 0.0381494                    | 0.0380851                    | 0.0311970                    | 0.0263241                     |
| 19.58                     | 475.08                | 448.96   | 441.36   | 387.03   | 19.58           | 0.0418556                    | 0.0385246                    | 0.0372840                    | 0.0167354                     |
| 20.58                     | 477.65                | 446.65   | 435.01   | 389.12   | 20.58           | 0.0474916                    | 0.0331812                    | 0.0223603                    | 0.0222259                     |
| 21.58                     | 467.35                | 442.81   | 438.8    | 382.62   | 21.58           | 0.0249036                    | 0.0242986                    | 0.0312675                    | 0.0051503                     |
| 22.58                     | 477.01                | 446.27   | 439.45   | 388.05   | 22.58           | 0.0460881                    | 0.0323021                    | 0.0327952                    | 0.0194150                     |
| 23.58                     | 486.47                | 462.82   | 447.22   | 395.87   | 23.58           | 0.0668340                    | 0.0705853                    | 0.0510562                    | 0.0399583                     |
| 24.58                     | 490.71                | 459.59   | 452.9    | 400.01   | 24.58           | 0.0761323                    | 0.0631137                    | 0.0644053                    | 0.0508341                     |
| 25.58                     | 512.51                | 487.99   | 472.52   | 409.58   | 25.58           | 0.1239400                    | 0.1288080                    | 0.1105162                    | 0.0759747                     |
| 26.58                     | 533.69                | 504.46   | 486.22   | 430.72   | 26.58           | 0.1703880                    | 0.1669060                    | 0.1427140                    | 0.1315099                     |
| 27.58                     | 583.6                 | 547.96   | 533.95   | 468.26   | 27.58           | 0.2798411                    | 0.2675293                    | 0.2548890                    | 0.2301282                     |
| 28.56                     | 603.79                | 578.94   | 567.53   | 497.53   | 28.56           | 0.3241180                    | 0.3391915                    | 0.3338087                    | 0.3070211                     |
| 29.61                     | 671.55                | 638.66   | 621.07   | 540.77   | 29.61           | 0.4727164                    | 0.4773346                    | 0.4596384                    | 0.4206134                     |
| 30.56                     | 743.33                | 706.34   | 680.69   | 586.52   | 30.56           | 0.6301307                    | 0.6338905                    | 0.5997573                    | 0.5407996                     |
| 31.63                     | 790.46                | 756.9    | 726.84   | 627.36   | 31.63           | 0.7334873                    | 0.7508448                    | 0.7082190                    | 0.6480871                     |
| 32.63                     | 865.75                | 809.34   | 789.9    | 670.84   | 32.63           | 0.8985991                    | 0.8721479                    | 0.8564226                    | 0.7623099                     |
| 33.63                     | 912.84                | 858.88   | 829.06   | 699.92   | 33.63           | 1.0018680                    | 0.9867427                    | 0.9484564                    | 0.8387036                     |
| 34.63                     | 979.2                 | 921.91   | 884.29   | 748.12   | 34.63           | 1.1473962                    | 1.1325423                    | 1.0782579                    | 0.9653260                     |
| 35.63                     | 1018.5                | 956.8    | 909.09   | 774.43   | 35.63           | 1.2336473                    | 1.2132491                    | 1.1365428                    | 1.0344429                     |
| 36.63                     | 1089.3                | 1021.24  | 980.53   | 823.33   | 36.63           | 1.3887370                    | 1.3623104                    | 1.3044411                    | 1.1629041                     |
| 37.65                     | 1136.9                | 1070.81  | 1010.43  | 856.48   | 37.65           | 1.4931682                    | 1.4769746                    | 1.3747120                    | 1.2499898                     |
| 38.65                     | 1203.5                | 1123.2   | 1065.57  | 896.88   | 38.65           | 1.6393763                    | 1.5981620                    | 1.5043020                    | 1.3561214                     |
| 39.65                     | 1229.6                | 1152.65  | 1106.66  | 921.27   | 39.65           | 1.6965700                    | 1.6662851                    | 1.6008717                    | 1.4201944                     |
| <b>a</b>                  | #####                 | 794.70   | 734.29   | 581.07   |                 |                              |                              |                              |                               |
| <b>b</b>                  | 3.16                  | 3.14     | 3.11     | 3.03     |                 |                              |                              |                              |                               |
| <b>x0</b>                 | 33.20                 | 33.08    | 32.97    | 32.85    |                 |                              |                              |                              |                               |
| <b>y0</b>                 | #####                 | 432.31   | 425.50   | 380.66   |                 |                              |                              |                              |                               |
| <b>R</b>                  | 1.00                  | 1.00     | 1.00     | 1.00     |                 |                              |                              |                              |                               |
| <b>CP<sub>(SDM)</sub></b> | 29.04                 | 28.94    | 28.88    | 28.86    |                 |                              |                              |                              |                               |
