# Supplementary material for: Quantify single nucleotide polymorphism (SNP) ratio in pooled DNA based on normalized fluorescence real-time PCR
Source: PubMed Central journal article supplement (PMC1552069; doi:10.1186/1471-2164-7-143), 2006-06-09
Supplement: 1471-2164-7-143-S4.pdf [file 1471-2164-7-143-S4.pdf]

| Well / | FAM baseline subtracted fluorescence |       |       |       |       |       |       |       |       |       |       |       |       |       |       |       |       |       |       |       |       |       |       |       |       |       |
|--------|--------------------------------------|-------|-------|-------|-------|-------|-------|-------|-------|-------|-------|-------|-------|-------|-------|-------|-------|-------|-------|-------|-------|-------|-------|-------|-------|-------|
| Cycle  | B5                                   | B6    | B7    | B8    | B9    | C3    | C4    | C5    | C6    | C7    | C8    | C9    | D2    | D3    | D4    | D5    | D6    | D7    | D8    | D9    | E2    | E3    | E4    | E5    | E6    | E7    |
| 0.58   | -9.33                                | -5.94 | -9.24 | -9.73 | -12.1 | -4.38 | -3.79 | -1.9  | -5.12 | -1.17 | -8.88 | -9.7  | -4.66 | -7.91 | -4.8  | -5.19 | -6.16 | -13.3 | -10.2 | -7.4  | -9.17 | -6.64 | -3.93 | -6.33 | -4.37 | -7.32 |
| 1.7    | -5.62                                | -4.85 | -6.42 | -9.48 | -8.08 | -4.03 | -2.69 | -2.57 | -2.84 | -3.19 | -5.57 | -5.39 | -3.45 | -5.78 | -3.99 | -4.65 | -3.84 | -6.64 | -5.61 | -5.45 | -4.4  | -4.4  | -3.43 | -2.72 | -1.98 | -2.8  |
| 2.7    | -1.92                                | -1.87 | -3.24 | -5.74 | -3.24 | -1.52 | 0.8   | -0.88 | 0.02  | -1.99 | -2.39 | -2.13 | -1.79 | -2.68 | -2.49 | -2.66 | -1.32 | -2.3  | -2.13 | -3.04 | -1.62 | -2.49 | -2.21 | -0.93 | -0.82 | -0.52 |
| 3.7    | 0.72                                 | 0.69  | -0.74 | -1.84 | 0.56  | 0.82  | 3.72  | 0.9   | 2.05  | -0.24 | -0.1  | 0.01  | -0.36 | -0.04 | -1.03 | -0.65 | 0.62  | 0.38  | 0.19  | -0.94 | -0.04 | -1.05 | -0.97 | -0.03 | -0.21 | 0.58  |
| 4.7    | 1.93                                 | 1.99  | 0.68  | 0.86  | 2.53  | 2.1   | 4.96  | 1.9   | 2.78  | 1.01  | 1.01  | 1     | 0.55  | 1.52  | 0.05  | 0.77  | 1.63  | 1.63  | 1.32  | 0.48  | 0.63  | -0.13 | -0.02 | 0.32  | 0.06  | 0.92  |
| 5.7    | 1.87                                 | 1.99  | 1.1   | 2.04  | 2.76  | 2.18  | 4.45  | 1.94  | 2.3   | 1.44  | 1.09  | 1.06  | 0.92  | 1.96  | 0.64  | 1.42  | 1.78  | 1.81  | 1.5   | 1.17  | 0.69  | 0.31  | 0.54  | 0.35  | 0.18  | 0.8   |
| 6.7    | 1                                    | 1.08  | 0.85  | 1.95  | 1.75  | 1.37  | 2.71  | 1.22  | 1.05  | 1.14  | 0.51  | 0.56  | 0.85  | 1.54  | 0.79  | 1.41  | 1.31  | 1.31  | 1.07  | 1.25  | 0.45  | 0.4   | 0.74  | 0.23  | 0.22  | 0.47  |
| 7.7    | -0.16                                | -0.19 | 0.32  | 1.11  | 0.17  | 0.14  | 0.42  | 0.12  | -0.47 | 0.39  | -0.33 | -0.17 | 0.54  | 0.63  | 0.64  | 0.96  | 0.54  | 0.5   | 0.41  | 0.94  | 0.11  | 0.31  | 0.69  | 0.08  | 0.25  | 0.09  |
| 8.7    | -1.17                                | -1.32 | -0.17 | 0.06  | -1.37 | -1.05 | -1.71 | -0.98 | -1.79 | -0.44 | -1.06 | -0.81 | 0.16  | -0.37 | 0.33  | 0.34  | -0.24 | -0.31 | -0.2  | 0.45  | -0.15 | 0.15  | 0.51  | -0.05 | 0.3   | -0.23 |
| 9.7    | -1.71                                | -1.94 | -0.37 | -0.75 | -2.43 | -1.85 | -3.19 | -1.77 | -2.59 | -1.09 | -1.43 | -1.18 | -0.14 | -1.17 | 0     | -0.24 | -0.8  | -0.93 | -0.56 | -0.04 | -0.25 | 0.04  | 0.29  | -0.11 | 0.35  | -0.44 |
| 10.7   | -1.66                                | -1.87 | -0.2  | -1.06 | -2.75 | -2.05 | -3.72 | -2.06 | -2.7  | -1.36 | -1.33 | -1.17 | -0.29 | -1.57 | -0.24 | -0.62 | -1.02 | -1.25 | -0.59 | -0.38 | -0.16 | 0.02  | 0.13  | -0.12 | 0.4   | -0.53 |
| 11.7   | -1.04                                | -1.14 | 0.3   | -0.79 | -2.3  | -1.65 | -3.27 | -1.83 | -2.15 | -1.19 | -0.79 | -0.82 | -0.26 | -1.51 | -0.35 | -0.72 | -0.89 | -1.24 | -0.3  | -0.53 | 0.08  | 0.1   | 0.05  | -0.07 | 0.43  | -0.5  |
| 12.7   | -0.04                                | 0.06  | 1     | -0.06 | -1.24 | -0.75 | -2.02 | -1.15 | -1.07 | -0.65 | 0.07  | -0.2  | -0.08 | -1.04 | -0.31 | -0.56 | -0.46 | -0.96 | 0.19  | -0.48 | 0.39  | 0.25  | 0.06  | 0.01  | 0.4   | -0.39 |
| 13.7   | 1.09                                 | 1.41  | 1.67  | 0.89  | 0.14  | 0.39  | -0.32 | -0.2  | 0.25  | 0.11  | 1.04  | 0.51  | 0.17  | -0.31 | -0.15 | -0.21 | 0.13  | -0.51 | 0.72  | -0.3  | 0.7   | 0.41  | 0.13  | 0.08  | 0.3   | -0.24 |
| 14.7   | 2.05                                 | 2.58  | 2.11  | 1.76  | 1.5   | 1.49  | 1.41  | 0.77  | 1.53  | 0.89  | 1.89  | 1.15  | 0.4   | 0.5   | 0.07  | 0.23  | 0.72  | -0.01 | 1.11  | -0.06 | 0.89  | 0.53  | 0.2   | 0.14  | 0.11  | -0.11 |
| 15.7   | 2.57                                 | 3.2   | 2.12  | 2.24  | 2.51  | 2.25  | 2.75  | 1.54  | 2.46  | 1.47  | 2.4   | 1.55  | 0.53  | 1.17  | 0.26  | 0.61  | 1.14  | 0.43  | 1.2   | 0.13  | 0.89  | 0.51  | 0.23  | 0.16  | -0.19 | -0.03 |
| 16.7   | 2.44                                 | 3.02  | 1.56  | 2.08  | 2.88  | 2.44  | 3.33  | 1.91  | 2.8   | 1.68  | 2.42  | 1.58  | 0.46  | 1.52  | 0.37  | 0.82  | 1.27  | 0.7   | 0.86  | 0.19  | 0.65  | 0.31  | 0.16  | 0.14  | -0.6  | -0.03 |
| 17.7   | 1.57                                 | 1.92  | 0.44  | 1.15  | 2.5   | 1.92  | 2.96  | 1.77  | 2.41  | 1.4   | 1.88  | 1.18  | 0.17  | 1.42  | 0.33  | 0.77  | 1.02  | 0.77  | 0.03  | 0.06  | 0.15  | -0.09 | -0.06 | 0.05  | -1.12 | -0.11 |
| 18.7   | 0.03                                 | -0.05 | -1.14 | -0.5  | 1.4   | 0.72  | 1.62  | 1.13  | 1.3   | 0.63  | 0.82  | 0.37  | -0.34 | 0.86  | 0.12  | 0.44  | 0.42  | 0.64  | -1.24 | -0.29 | -0.55 | -0.69 | -0.42 | -0.08 | -1.72 | -0.27 |
| 19.7   | -1.94                                | -2.65 | -2.9  | -2.64 | -0.18 | -0.99 | -0.46 | 0.14  | -0.36 | -0.51 | -0.57 | -0.73 | -0.98 | -0.1  | -0.26 | -0.14 | -0.43 | 0.4   | -2.81 | -0.79 | -1.38 | -1.44 | -0.91 | -0.24 | -2.39 | -0.48 |
| 20.7   | -3.97                                | -5.42 | -4.46 | -4.84 | -1.8  | -2.85 | -2.84 | -0.92 | -2.26 | -1.77 | -1.98 | -1.91 | -1.62 | -1.26 | -0.74 | -0.85 | -1.34 | 0.2   | -4.45 | -1.34 | -2.18 | -2.23 | -1.47 | -0.41 | -3.08 | -0.69 |
| 21.7   | -5.49                                | -7.73 | -5.29 | -6.51 | -2.81 | -4.36 | -4.84 | -1.63 | -3.91 | -2.79 | -2.98 | -2.86 | -2.06 | -2.29 | -1.21 | -1.49 | -2    | 0.25  | -5.82 | -1.77 | -2.77 | -2.92 | -2.01 | -0.57 | -3.74 | -0.81 |
| 22.7   | -5.86                                | -8.81 | -4.77 | -6.88 | -2.46 | -4.88 | -5.61 | -1.47 | -4.73 | -3.07 | -3.06 | -3.21 | -2.04 | -2.81 | -1.5  | -1.82 | -2.05 | 0.8   | -6.53 | -1.84 | -2.92 | -3.33 | -2.38 | -0.67 | -4.3  | -0.77 |
| 23.7   | -4.34                                | -7.79 | -2.26 | -5.12 | 0.13  | -3.67 | -4.19 | 0.18  | -4.02 | -2.08 | -1.64 | -2.54 | -1.28 | -2.32 | -1.41 | -1.53 | -1.06 | 2.14  | -6.12 | -1.27 | -2.39 | -3.25 | -2.44 | -0.69 | -4.7  | -0.45 |
| 24.7   | -0.23                                | -3.81 | 2.89  | -0.4  | 5.82  | -0.01 | 0.41  | 3.93  | -1.11 | 0.77  | 1.85  | -0.43 | 0.55  | -0.32 | -0.69 | -0.29 | 1.4   | 4.56  | -4.14 | 0.24  | -0.93 | -2.46 | -2.01 | -0.57 | -4.85 | 0.25  |
| 25.7   | 7.16                                 | 3.95  | 11.25 | 8.07  | 15.43 | 6.81  | 9.14  | 10.36 | 4.67  | 6.02  | 7.95  | 3.51  | 3.73  | 3.7   | 0.92  | 2.22  | 5.76  | 8.34  | -0.17 | 3.02  | 1.7   | -0.74 | -0.92 | -0.29 | -4.65 | 1.45  |
| 26.7   | 18.33                                | 16.1  | 23.22 | 20.88 | 29.58 | 17.37 | 22.75 | 19.98 | 13.84 | 14.14 | 17.08 | 9.61  | 8.53  | 10.16 | 3.69  | 6.28  | 12.36 | 13.68 | 6.15  | 7.35  | 5.67  | 2.12  | 0.99  | 0.19  | -4.01 | 3.24  |
| 27.58  | 31.6                                 | 30.81 | 37    | 36.09 | 46.17 | 30.1  | 39.23 | 31.39 | 25.05 | 23.96 | 27.87 | 16.98 | 14.28 | 18.16 | 7.29  | 11.31 | 20.27 | 19.82 | 13.88 | 12.65 | 10.41 | 5.71  | 3.47  | 0.81  | -2.99 | 5.38  |
| 28.56  | 50.07                                | 51.54 | 55.74 | 57.26 | 69.09 | 48.05 | 62.51 | 47.33 | 40.98 | 37.87 | 42.87 | 27.38 | 22.41 | 29.7  | 12.72 | 18.59 | 31.42 | 28.21 | 24.88 | 20.29 | 17.06 | 10.96 | 7.17  | 1.73  | -1.29 | 8.45  |
| 29.56  | 72.76                                | 77.21 | 78.35 | 83.23 | 97.11 | 70.36 | 91.46 | 67.05 | 60.9  | 55.26 | 61.31 | 40.33 | 32.62 | 44.34 | 19.98 | 27.83 | 45.32 | 38.43 | 38.68 | 30.07 | 25.33 | 17.74 | 12.02 | 2.94  | 1.15  | 12.36 |
| 30.56  | 98.7                                 | 106.7 | 103.9 | 112.8 | 129.1 | 96.15 | 124.9 | 89.82 | 84.01 | 75.51 | 82.47 | 55.36 | 44.62 | 61.63 | 29    | 38.75 | 61.51 | 50.12 | 54.81 | 41.78 | 34.97 | 25.88 | 17.92 | 4.46  | 4.38  | 17.05 |
| 31.58  | 127.5                                | 139.6 | 131.9 | 145.5 | 164.5 | 125.1 | 162.4 | 115.5 | 110.1 | 98.44 | 106.1 | 72.36 | 58.43 | 81.48 | 39.97 | 51.28 | 79.92 | 63.21 | 73.21 | 55.53 | 45.99 | 35.46 | 24.92 | 6.35  | 8.55  | 22.63 |
| 32.58  | 156.8                                | 172.9 | 160.1 | 178.5 | 200.4 | 154.9 | 200.7 | 141.9 | 136.9 | 122.2 | 130.3 | 89.98 | 73.05 | 102.4 | 52.23 | 64.45 | 99.14 | 76.72 | 92.49 | 70.4  | 57.59 | 45.84 | 32.57 | 8.53  | 13.5  | 28.78 |
| 33.56  | 185                                  | 204.9 | 187.1 | 209.9 | 235   | 183.8 | 237.9 | 167.8 | 163.1 | 145.6 | 154   | 107.4 | 87.86 | 123.3 | 65.35 | 77.64 | 118.3 | 90.14 | 111.9 | 85.85 | 69.34 | 56.63 | 40.6  | 11.03 | 19.13 | 35.34 |
| 34.58  | 212.4                                | 235.7 | 213.3 | 240   | 268.5 | 212.3 | 274.2 | 193.7 | 189.1 | 169   | 177.4 | 125   | 103.2 | 144.6 | 79.66 | 91.08 | 137.8 | 103.8 | 131.9 | 102.3 | 81.56 | 68.18 | 49.28 | 14.05 | 25.74 | 42.56 |
| 35.65  | 237.3                                | 263.5 | 237.1 | 266.9 | 299.2 | 238.7 | 307.6 | 218   | 213.4 | 191   | 199.5 | 141.9 | 118.2 | 165.3 | 94.53 | 104.2 | 156.6 | 117.4 | 151.9 | 119.1 | 93.86 | 80.08 | 58.42 | 17.74 | 33.21 | 50.28 |
| 36.65  | 256.7                                | 284.3 | 255.7 | 287.2 | 323   | 259.4 | 333.9 | 237.6 | 233   | 208.6 | 217.6 | 155.9 | 130.8 | 182.6 | 107.5 | 115.2 | 172.3 | 129.3 | 169.6 | 133.9 | 104.7 | 90.72 | 66.88 | 21.77 | 40.42 | 57.42 |
| 37.56  | 271.2                                | 299.5 | 269.9 | 302.4 | 341.1 | 275   | 354   | 252.7 | 248.6 | 222.1 | 232.2 | 167.4 | 140.6 | 196.4 | 117.8 | 124.3 | 184.8 | 139.9 | 185.2 | 146.3 | 113.8 | 99.78 | 74.5  | 26.07 | 46.79 | 63.62 |
| 38.65  | 287                                  | 315.3 | 285.6 | 319.6 | 361.1 | 291.6 | 376.4 | 269   | 266.3 | 236.2 | 249   | 180.6 | 150.1 | 211.3 | 126.9 | 134.7 | 198.3 | 153.2 | 204.6 | 159.4 | 124.4 | 109.8 | 83.76 | 32.17 | 53.42 | 70.33 |
| 39.56  | 302.8                                | 331.4 | 301.5 | 338.9 | 381.7 | 307.4 | 399.5 | 283.9 | 284.1 | 248.8 | 265.9 | 193.1 | 156.8 | 224.6 | 131   | 144.7 | 210   | 166.9 | 223.9 | 169.4 | 133.6 | 117.8 | 92.28 | 38.37 | 57.43 | 75.18 |

Well/

## VIC baseline subtracted fluorescence

| Cycle | B5    | B6    | B7    | B8    | B9    | C3    | C4    | C5    | C6    | C7    | C8    | C9    | D2    | D3    | D4    | D5        | D6    | D7    | D8     | D9    | E2    | E3    | E4    | E5    | E6    | E7    |
|-------|-------|-------|-------|-------|-------|-------|-------|-------|-------|-------|-------|-------|-------|-------|-------|-----------|-------|-------|--------|-------|-------|-------|-------|-------|-------|-------|
| 0.58  | -4.38 | -3.48 | -3.8  | -3.36 | -1.07 | -1.55 | -0.32 | 0.74  | -0.29 | -1.7  | -0.59 | -0.16 | -1.23 | -0.8  | -0.38 | 2.35      | 1.43  | -0.79 | -0.86  | -0.57 | -0.15 | -0.27 | 3.5   | 6.28  | 0.85  | 3.96  |
| 1.7   | -2.41 | -0.92 | -1.96 | -3.41 | -1.29 | -3.18 | -1.77 | -1.62 | -2.69 | -2.04 | -3.47 | -3.04 | -2.45 | -2.83 | -4.16 | -5.77     | -3.3  | -2.64 | -7.29  | -4.8  | -3.24 | -5.02 | -3.39 | -6.04 | -5.73 | -5.27 |
| 2.7   | -1.06 | 0.47  | -0.9  | -1.88 | -0.44 | -2.08 | -1.18 | -1.24 | -1.83 | -0.75 | -2.4  | -2.2  | -1.43 | -1.7  | -2.98 | -3.93     | -2.04 | -1.32 | -5.08  | -3.03 | -1.89 | -3.38 | -2.24 | -5.31 | -3.6  | -4.16 |
| 3.7   | -0.17 | 1.11  | -0.28 | -0.24 | 0.43  | -0.47 | -0.18 | -0.21 | -0.28 | 0.59  | -0.5  | -0.55 | -0.05 | 0     | -0.75 | 0.09      | 0.41  | 0.38  | -1.03  | -0.14 | 0.2   | -0.4  | 0.62  | -1.22 | 0.17  | -0.56 |
| 4.7   | 0.29  | 1.16  | 0.03  | 0.89  | 0.91  | 0.74  | 0.57  | 0.62  | 0.91  | 1.36  | 0.96  | 0.75  | 0.92  | 1.22  | 1     | 3.2       | 2.21  | 1.4   | 2.14   | 1.94  | 1.61  | 1.9   | 2.76  | 2.42  | 2.87  | 2.45  |
| 5.7   | 0.43  | 0.85  | 0.14  | 1.33  | 0.91  | 1.25  | 0.85  | 0.95  | 1.39  | 1.44  | 1.55  | 1.29  | 1.26  | 1.61  | 1.74  | 4.3       | 2.73  | 1.5   | 3.47   | 2.61  | 1.93  | 2.81  | 3.34  | 4.08  | 3.62  | 3.69  |
| 6.7   | 0.35  | 0.35  | 0.14  | 1.17  | 0.53  | 1.1   | 0.69  | 0.78  | 1.19  | 0.98  | 1.31  | 1.09  | 1.05  | 1.26  | 1.5   | 3.46      | 2.08  | 0.86  | 3.04   | 2     | 1.32  | 2.41  | 2.45  | 3.67  | 2.63  | 3.16  |
| 7.7   | 0.17  | -0.16 | 0.11  | 0.61  | -0.03 | 0.53  | 0.26  | 0.29  | 0.55  | 0.24  | 0.53  | 0.42  | 0.51  | 0.45  | 0.66  | 1.37      | 0.75  | -0.13 | 1.47   | 0.63  | 0.19  | 1.15  | 0.67  | 1.81  | 0.64  | 1.45  |
| 8.7   | -0.03 | -0.56 | 0.08  | -0.08 | -0.6  | -0.19 | -0.25 | -0.3  | -0.22 | -0.5  | -0.42 | -0.4  | -0.12 | -0.49 | -0.37 | -1.11     | -0.73 | -1.08 | -0.47  | -0.9  | -0.98 | -0.38 | -1.29 | -0.58 | -1.51 | -0.66 |
| 9.7   | -0.17 | -0.79 | 0.08  | -0.7  | -1.02 | -0.81 | -0.65 | -0.81 | -0.87 | -1    | -1.21 | -1.09 | -0.62 | -1.26 | -1.21 | -3.19     | -1.86 | -1.68 | -2.1   | -2.08 | -1.82 | -1.67 | -2.84 | -2.68 | -3.1  | -2.44 |
| 10.7  | -0.22 | -0.83 | 0.12  | -1.1  | -1.18 | -1.16 | -0.84 | -1.08 | -1.2  | -1.16 | -1.63 | -1.44 | -0.86 | -1.66 | -1.6  | -4.33     | -2.34 | -1.77 | -2.94  | -2.57 | -2.09 | -2.36 | -3.56 | -3.87 | -3.68 | -3.41 |
| 11.7  | -0.18 | -0.69 | 0.18  | -1.19 | -1.07 | -1.16 | -0.77 | -1.06 | -1.14 | -0.95 | -1.57 | -1.38 | -0.78 | -1.6  | -1.46 | -4.29     | -2.06 | -1.33 | -2.81  | -2.27 | -1.73 | -2.31 | -3.31 | -3.88 | -3.12 | -3.34 |
| 12.7  | -0.07 | -0.42 | 0.24  | -0.98 | -0.71 | -0.82 | -0.47 | -0.75 | -0.71 | -0.42 | -1.06 | -0.94 | -0.43 | -1.12 | -0.85 | -3.12     | -1.12 | -0.49 | -1.77  | -1.27 | -0.87 | -1.56 | -2.19 | -2.76 | -1.58 | -2.31 |
| 13.7  | 0.07  | -0.09 | 0.3   | -0.55 | -0.19 | -0.24 | -0.01 | -0.25 | -0.04 | 0.28  | -0.23 | -0.23 | 0.09  | -0.34 | 0.07  | -1.15     | 0.22  | 0.54  | -0.11  | 0.16  | 0.27  | -0.32 | -0.5  | -0.83 | 0.54  | -0.61 |
| 14.7  | 0.21  | 0.23  | 0.31  | -0.01 | 0.39  | 0.43  | 0.49  | 0.33  | 0.71  | 0.98  | 0.72  | 0.56  | 0.65  | 0.56  | 1.06  | 1.15      | 1.64  | 1.49  | 1.73   | 1.67  | 1.41  | 1.09  | 1.34  | 1.43  | 2.74  | 1.34  |
| 15.7  | 0.3   | 0.47  | 0.28  | 0.52  | 0.9   | 1.03  | 0.91  | 0.86  | 1.35  | 1.51  | 1.56  | 1.22  | 1.09  | 1.37  | 1.85  | 3.27      | 2.77  | 2.11  | 3.29   | 2.88  | 2.24  | 2.33  | 2.89  | 3.46  | 4.44  | 3.04  |
| 16.7  | 0.32  | 0.59  | 0.21  | 0.89  | 1.24  | 1.42  | 1.13  | 1.21  | 1.72  | 1.73  | 2.1   | 1.59  | 1.31  | 1.91  | 2.24  | 4.7       | 3.3   | 2.24  | 4.15   | 3.45  | 2.53  | 3.08  | 3.76  | 4.73  | 5.21  | 4.05  |
| 17.7  | 0.25  | 0.55  | 0.11  | 1.02  | 1.35  | 1.48  | 1.09  | 1.31  | 1.69  | 1.55  | 2.2   | 1.54  | 1.22  | 2.04  | 2.08  | 5.1       | 3.04  | 1.77  | 4.04   | 3.2   | 2.16  | 3.14  | 3.69  | 4.9   | 4.74  | 4.08  |
| 18.7  | 0.1   | 0.37  | 0.01  | 0.85  | 1.2   | 1.19  | 0.77  | 1.13  | 1.24  | 0.97  | 1.81  | 1.04  | 0.84  | 1.74  | 1.39  | 4.36      | 1.95  | 0.8   | 2.88   | 2.09  | 1.16  | 2.44  | 2.63  | 3.84  | 3.01  | 3.05  |
| 19.7  | -0.09 | 0.09  | -0.03 | 0.39  | 0.84  | 0.6   | 0.23  | 0.73  | 0.44  | 0.12  | 1.01  | 0.16  | 0.26  | 1.06  | 0.3   | 2.63      | 0.22  | -0.45 | 0.88   | 0.29  | -0.28 | 1.11  | 0.76  | 1.73  | 0.31  | 1.12  |
| 20.7  | -0.27 | -0.2  | 0.04  | -0.26 | 0.38  | -0.15 | -0.39 | 0.24  | -0.53 | -0.82 | -0.01 | -0.89 | -0.34 | 0.18  | -0.89 | 0.38      | -1.79 | -1.59 | -1.51  | -1.78 | -1.77 | -0.53 | -1.48 | -0.92 | -2.78 | -1.24 |
| 21.7  | -0.34 | -0.4  | 0.3   | -0.96 | -0.02 | -0.81 | -0.88 | -0.13 | -1.38 | -1.53 | -0.93 | -1.82 | -0.69 | -0.6  | -1.74 | -1.65     | -3.47 | -2.09 | -3.55  | -3.52 | -2.77 | -1.97 | -3.42 | -3.29 | -5.37 | -3.32 |
| 22.7  | -0.22 | -0.36 | 0.84  | -1.48 | -0.13 | -1.07 | -0.95 | -0.11 | -1.7  | -1.62 | -1.31 | -2.21 | -0.45 | -0.88 | -1.68 | -2.44     | -4.07 | -1.29 | -4.29  | -4.14 | -2.63 | -2.53 | -4.17 | -4.3  | -6.32 | -4.18 |
| 23.7  | 0.2   | 0.09  | 1.75  | -1.54 | 0.3   | -0.54 | -0.27 | 0.66  | -1.03 | -0.64 | -0.67 | -1.6  | 0.77  | -0.2  | -0.09 | -0.78     | -2.71 | 1.51  | -2.59  | -2.73 | -0.61 | -1.43 | -2.74 | -2.66 | -4.36 | -2.71 |
| 24.7  | 1.06  | 1.1   | 3.13  | -0.84 | 1.56  | 1.2   | 1.53  | 2.5   | 1.15  | 1.88  | 1.54  | 0.53  | 3.38  | 1.97  | 3.68  | 4.6       | 1.52  | 7.03  | 2.71   | 1.67  | 4.03  | 2.14  | 1.93  | 2.97  | 1.85  | 2.23  |
| 25.7  | 2.45  | 2.83  | 5.05  | 0.94  | 3.92  | 4.56  | 4.81  | 5.78  | 5.35  | 6.39  | 5.84  | 4.65  | 7.74  | 6.11  | 10.2  | 14.95     | 9.5   | 15.9  | 12.76  | 9.93  | 11.95 | 8.96  | 10.81 | 13.88 | 13.54 | 11.7  |
| 26.7  | 4.48  | 5.44  | 7.6   | 4.07  | 7.62  | 9.91  | 9.91  | 10.79 | 12.02 | 13.29 | 12.68 | 11.19 | 14.17 | 12.66 | 19.93 | 31.35     | 21.96 | 28.62 | 28.5   | 22.82 | 23.65 | 19.67 | 24.69 | 31.14 | 31.67 | 26.6  |
| 27.58 | 6.85  | 8.55  | 10.4  | 8.16  | 12.14 | 16.51 | 16.15 | 16.84 | 20.26 | 21.58 | 21.09 | 19.2  | 21.75 | 20.73 | 31.42 | 51.48     | 37.08 | 43.26 | 47.68  | 38.43 | 37.33 | 32.69 | 41.5  | 52.24 | 53.54 | 44.72 |
| 28.56 | 10.15 | 12.94 | 14.14 | 14.25 | 18.62 | 26.03 | 25.09 | 25.41 | 32.16 | 33.31 | 33.14 | 30.66 | 32.26 | 32.31 | 47.31 | 80.28     | 58.53 | 63.22 | 74.93  | 60.51 | 56.13 | 51.13 | 65.24 | 82.25 | 84.29 | 70.34 |
| 29.56 | 14.24 | 18.46 | 18.65 | 22.22 | 26.81 | 38.14 | 36.49 | 36.18 | 47.34 | 48.48 | 48.33 | 45.07 | 45.21 | 46.99 | 66.71 | 116.6     | 85.33 | 87.36 | 109.88 | 88.02 | 78.89 | 74.06 | 94.64 | 119.7 | 122.3 | 102.1 |
| 30.56 | 19.01 | 24.99 | 23.82 | 31.85 | 36.47 | 52.49 | 50.08 | 48.8  | 65.39 | 65.16 | 66.14 | 61.92 | 60.09 | 64.29 | 88.69 | 159.116.4 | 114.6 | 148.6 | 119.8  | 104.5 | 100.5 | 128.4 | 163   | 165.7 | 138.7 |       |
| 31.58 | 24.49 | 32.57 | 29.71 | 43.18 | 47.56 | 69.06 | 65.91 | 63.23 | 86.31 | 84.75 | 86.42 | 81.06 | 76.76 | 84.13 | 112.8 | 207.1     | 151.5 | 144.6 | 193.3  | 155.5 | 132.3 | 129.9 | 165.9 | 211.4 | 213.7 | 179.2 |
| 32.58 | 30.32 | 40.73 | 35.99 | 55.36 | 59.24 | 86.63 | 82.91 | 78.36 | 108.6 | 105.3 | 107.5 | 100.9 | 93.85 | 104.9 | 137   | 256.9     | 187.4 | 174.8 | 239.1  | 191.9 | 159.7 | 159.6 | 203.6 | 260.5 | 261.9 | 219.9 |
| 33.56 | 36.32 | 49.2  | 42.52 | 67.89 | 71.01 | 104.4 | 100.4 | 93.54 | 131.1 | 125.9 | 128.5 | 120.4 | 110.5 | 125.7 | 159.7 | 305.8     | 222.5 | 203.8 | 283.6  | 227.1 | 185.2 | 187.9 | 239.4 | 307.3 | 307.4 | 258.5 |
| 34.58 | 42.7  | 58.32 | 49.57 | 81.03 | 83.11 | 122.9 | 118.9 | 109.1 | 154.5 | 146.9 | 149.5 | 139.9 | 127   | 146.8 | 181.3 | 354       | 256.8 | 231.8 | 327.1  | 261.2 | 208.5 | 214.7 | 273.2 | 351.6 | 350   | 294.6 |
| 35.65 | 49.39 | 67.91 | 57.07 | 94.31 | 95.02 | 141.3 | 137.6 | 124.3 | 177.4 | 167.5 | 169.7 | 158.2 | 142.5 | 166.9 | 200.4 | 398.7     | 288.2 | 257.4 | 366.7  | 292.1 | 228.1 | 238   | 302.8 | 390.2 | 386.4 | 325.7 |
| 36.65 | 55.61 | 76.83 | 64.12 | 106   | 105.2 | 157.2 | 154   | 137.2 | 196.6 | 184.9 | 186.4 | 172.9 | 154.8 | 183.4 | 215   | 433.5     | 312.4 | 277.8 | 396.7  | 315.5 | 241.6 | 254.8 | 324.4 | 417.4 | 411.7 | 347.7 |
| 37.56 | 61.35 | 84.91 | 70.52 | 116   | 113.7 | 170.7 | 167.6 | 148   | 211.8 | 199.1 | 200.1 | 184.4 | 164.4 | 196.1 | 226.5 | 459.3     | 330   | 294   | 418.2  | 332.4 | 250.7 | 266.3 | 339.8 | 435.1 | 428.1 | 362.6 |
| 38.65 | 68.62 | 94.78 | 78.16 | 127.7 | 123.4 | 186.4 | 182.5 | 160.4 | 227.3 | 215   | 216.2 | 197   | 174.9 | 209.2 | 241.4 | 485.6     | 347.8 | 313.4 | 439.3  | 349.7 | 261.2 | 278   | 356.9 | 451.4 | 443.9 | 378.3 |
| 39.56 | 75.65 | 103.8 | 84.78 | 138.6 | 132.3 | 201.1 | 194.5 | 172.2 | 239.2 | 229.2 | 232.4 | 209.1 | 185.1 | 220.4 | 260.1 | 509.8     | 364.3 | 334.7 | 459    | 366.7 | 275.4 | 291.2 | 377.3 | 468.7 | 462.1 | 397.4 |

baseline subtracted fluorescence ratio

|       |       |       |       |       |       |       |       |       |       |       |       |       |       |       |       |       |       |       |       |       |       |       |       |       |       |       |
|-------|-------|-------|-------|-------|-------|-------|-------|-------|-------|-------|-------|-------|-------|-------|-------|-------|-------|-------|-------|-------|-------|-------|-------|-------|-------|-------|
| 26.7  | 18.33 | 16.1  | 23.22 | 20.88 | 29.58 | 17.37 | 22.75 | 19.98 | 13.84 | 14.14 | 17.08 | 9.61  | 8.53  | 10.16 | 3.69  | 6.28  | 12.36 | 13.68 | 6.15  | 7.35  | 5.67  | 2.12  | 0.99  | 0.19  | -4.01 | 3.24  |
| 27.58 | 31.6  | 30.81 | 37    | 36.09 | 46.17 | 30.1  | 39.23 | 31.39 | 25.05 | 23.96 | 27.87 | 16.98 | 14.28 | 18.16 | 7.29  | 11.31 | 20.27 | 19.82 | 13.88 | 12.65 | 10.41 | 5.71  | 3.47  | 0.81  | -2.99 | 5.38  |
| 28.56 | 50.07 | 51.54 | 55.74 | 57.26 | 69.09 | 48.05 | 62.51 | 47.33 | 40.98 | 37.87 | 42.87 | 27.38 | 22.41 | 29.7  | 12.72 | 18.59 | 31.42 | 28.21 | 24.88 | 20.29 | 17.06 | 10.96 | 7.17  | 1.73  | -1.29 | 8.45  |
| 29.56 | 72.76 | 77.21 | 78.35 | 83.23 | 97.11 | 70.36 | 91.46 | 67.05 | 60.9  | 55.26 | 61.31 | 40.33 | 32.62 | 44.34 | 19.98 | 27.83 | 45.32 | 38.43 | 38.68 | 30.07 | 25.33 | 17.74 | 12.02 | 2.94  | 1.15  | 12.36 |
| 30.56 | 98.7  | 106.7 | 103.9 | 112.8 | 129.1 | 96.15 | 124.9 | 89.82 | 84.01 | 75.51 | 82.47 | 55.36 | 44.62 | 61.63 | 29    | 38.75 | 61.51 | 50.12 | 54.81 | 41.78 | 34.97 | 25.88 | 17.92 | 4.46  | 4.38  | 17.05 |
| 31.58 | 127.5 | 139.6 | 131.9 | 145.5 | 164.5 | 125.1 | 162.4 | 115.5 | 110.1 | 98.44 | 106.1 | 72.36 | 58.43 | 81.48 | 39.97 | 51.28 | 79.92 | 63.21 | 73.21 | 55.53 | 45.99 | 35.46 | 24.92 | 6.35  | 8.55  | 22.63 |
| 32.58 | 156.8 | 172.9 | 160.1 | 178.5 | 200.4 | 154.9 | 200.7 | 141.9 | 136.9 | 122.2 | 130.3 | 89.98 | 73.05 | 102.4 | 52.23 | 64.45 | 99.14 | 76.72 | 92.49 | 70.4  | 57.59 | 45.84 | 32.57 | 8.53  | 13.5  | 28.78 |
| 26.7  | 4.48  | 5.44  | 7.6   | 4.07  | 7.62  | 9.91  | 9.91  | 10.79 | 12.02 | 13.29 | 12.68 | 11.19 | 14.17 | 12.66 | 19.93 | 31.35 | 21.96 | 28.62 | 28.5  | 22.82 | 23.65 | 19.67 | 24.69 | 31.14 | 31.67 | 26.6  |
| 27.58 | 6.85  | 8.55  | 10.4  | 8.16  | 12.14 | 16.51 | 16.15 | 16.84 | 20.26 | 21.58 | 21.09 | 19.2  | 21.75 | 20.73 | 31.42 | 51.48 | 37.08 | 43.26 | 47.68 | 38.43 | 37.33 | 32.69 | 41.5  | 52.24 | 53.54 | 44.72 |
| 28.56 | 10.15 | 12.94 | 14.14 | 14.25 | 18.62 | 26.03 | 25.09 | 25.41 | 32.16 | 33.31 | 33.14 | 30.66 | 32.26 | 32.31 | 47.31 | 80.28 | 58.53 | 63.22 | 74.93 | 60.51 | 56.13 | 51.13 | 65.24 | 82.25 | 84.29 | 70.34 |
| 29.56 | 14.24 | 18.46 | 18.65 | 22.22 | 26.81 | 38.14 | 36.49 | 36.18 | 47.34 | 48    | 48.33 | 45.07 | 45.21 | 46.99 | 66.71 | 116.6 | 85.33 | 87.36 | 109   | 88.02 | 78.89 | 74.06 | 94.64 | 119.7 | 122.3 | 102.1 |
| 30.56 | 19.01 | 24.99 | 23.82 | 31.85 | 36.47 | 52.49 | 50.08 | 48.8  | 65.39 | 65.16 | 66.14 | 61.92 | 60.09 | 64.29 | 88.69 | 159   | 116.4 | 114.6 | 148.6 | 119.8 | 104.5 | 100.5 | 128.4 | 163   | 165.7 | 138.7 |
| 31.58 | 24.49 | 32.57 | 29.71 | 43.18 | 47.56 | 69.06 | 65.91 | 63.23 | 86.31 | 84.75 | 86.42 | 81.06 | 76.76 | 84.13 | 112.8 | 207.1 | 151.5 | 144.6 | 193.3 | 155.5 | 132.3 | 129.9 | 165.9 | 211.4 | 213.7 | 179.2 |
| 32.58 | 30.32 | 40.73 | 35.99 | 55.36 | 59.24 | 86.63 | 82.91 | 78.36 | 108.6 | 105.3 | 107.5 | 100.9 | 93.85 | 104.9 | 137   | 256.9 | 187.4 | 174.8 | 239.1 | 191.9 | 159.7 | 159.6 | 203.6 | 260.5 | 261.9 | 219.9 |
| ratio | 5.378 | 4.462 | 4.849 | 3.07  | 3.309 | 2.443 | 1.793 | 1.804 | 1.276 | 1.176 | 1.193 | 0.895 | 0.809 | 0.999 | 0.413 | 0.258 | 0.524 | 0.43  | 0.409 | 0.372 | 0.37  | 0.302 | 0.169 | 0.035 |       | 0.128 |
