# Supplementary material for: Quantify single nucleotide polymorphism (SNP) ratio in pooled DNA based on normalized fluorescence real-time PCR
Source: PubMed Central journal article supplement (PMC1552069; doi:10.1186/1471-2164-7-143), 2006-06-09
Supplement: 1471-2164-7-143-S5.pdf [file 1471-2164-7-143-S5.pdf]

| Well / | FAM baseline subtracted fluorescence |       |       |       |       |       |       |       |       |       |       |       |       |       |       |       |       |       |       |       |       |       |       |       |       |       |
|--------|--------------------------------------|-------|-------|-------|-------|-------|-------|-------|-------|-------|-------|-------|-------|-------|-------|-------|-------|-------|-------|-------|-------|-------|-------|-------|-------|-------|
| Cycle  | A7                                   | A8    | A9    | B2    | B4    | B5    | B6    | B8    | B9    | C3    | C4    | C5    | C6    | C7    | C8    | C9    | D3    | D4    | D5    | D6    | D7    | D8    | D9    | E2    | E3    | E4    |
| 0.58   | -11.6                                | -5.61 | -8.18 | -3.9  | -6.79 | -5.2  | -6.11 | -4.03 | -7.2  | -5.62 | -7.66 | -5.33 | -6.34 | -5.16 | -5.26 | -5.44 | -3.83 | -2.53 | -3.78 | -2.85 | -3.81 | -9.61 | -9.41 | -10.5 | -6.99 | -4.48 |
| 1.7    | -11.3                                | -7.01 | -9.24 | -3.45 | -6.19 | -5.87 | -7.22 | -6.43 | -7    | -5.2  | -8.69 | -6.29 | -6.49 | -4.49 | -5.8  | -5.13 | -3.85 | -2.94 | -4.43 | -3.39 | -3.6  | -5.44 | -5.81 | -4.8  | -5.17 | -3.3  |
| 2.7    | -7.13                                | -4.23 | -5.96 | -1.81 | -3.41 | -3.66 | -4.69 | -4.25 | -4.4  | -3.15 | -5.73 | -4.27 | -4.11 | -2.55 | -3.89 | -3.09 | -2.4  | -2.2  | -3    | -2.08 | -1.27 | -1.9  | -2.69 | -1.7  | -3.09 | -1.78 |
| 3.7    | -2.56                                | -0.88 | -2.11 | -0.23 | -0.65 | -1.06 | -1.61 | -1.18 | -1.62 | -1.02 | -2.12 | -1.72 | -1.43 | -0.64 | -1.63 | -0.95 | -0.78 | -1.18 | -1.18 | -0.52 | 0.98  | 0.54  | -0.38 | -0.02 | -1.28 | -0.44 |
| 4.7    | 0.82                                 | 1.55  | 0.73  | 0.79  | 1.17  | 0.87  | 0.74  | 1.25  | 0.38  | 0.51  | 0.71  | 0.31  | 0.6   | 0.67  | 0.09  | 0.58  | 0.42  | -0.27 | 0.31  | 0.65  | 2.24  | 1.67  | 0.94  | 0.67  | -0.01 | 0.46  |
| 5.7    | 2.54                                 | 2.59  | 2.06  | 1.13  | 1.84  | 1.79  | 1.91  | 2.47  | 1.34  | 1.26  | 2.26  | 1.42  | 1.65  | 1.23  | 0.96  | 1.27  | 1.02  | 0.35  | 1.17  | 1.18  | 2.36  | 1.67  | 1.37  | 0.72  | 0.68  | 0.86  |
| 6.7    | 2.75                                 | 2.37  | 2.04  | 0.94  | 1.59  | 1.79  | 2     | 2.51  | 1.41  | 1.31  | 2.58  | 1.64  | 1.79  | 1.16  | 1.06  | 1.23  | 1.08  | 0.65  | 1.39  | 1.12  | 1.55  | 0.92  | 1.13  | 0.46  | 0.89  | 0.85  |
| 7.7    | 1.95                                 | 1.32  | 1.13  | 0.44  | 0.79  | 1.17  | 1.34  | 1.72  | 0.9   | 0.91  | 2.04  | 1.22  | 1.31  | 0.68  | 0.64  | 0.7   | 0.76  | 0.71  | 1.13  | 0.65  | 0.24  | -0.15 | 0.55  | 0.12  | 0.77  | 0.58  |
| 8.7    | 0.7                                  | -0.04 | -0.12 | -0.11 | -0.13 | 0.29  | 0.37  | 0.54  | 0.18  | 0.33  | 1.08  | 0.48  | 0.53  | 0.04  | 0     | -0.03 | 0.27  | 0.61  | 0.6   | 0.02  | -1.14 | -1.15 | -0.12 | -0.15 | 0.5   | 0.17  |
| 9.7    | -0.47                                | -1.25 | -1.21 | -0.53 | -0.84 | -0.52 | -0.53 | -0.59 | -0.43 | -0.2  | 0.12  | -0.28 | -0.23 | -0.52 | -0.59 | -0.71 | -0.2  | 0.43  | 0.01  | -0.59 | -2.22 | -1.81 | -0.66 | -0.27 | 0.23  | -0.22 |
| 10.7   | -1.2                                 | -1.99 | -1.82 | -0.68 | -1.13 | -1.02 | -1.08 | -1.37 | -0.72 | -0.52 | -0.55 | -0.82 | -0.75 | -0.86 | -0.92 | -1.16 | -0.51 | 0.27  | -0.48 | -1    | -2.75 | -1.98 | -0.93 | -0.2  | 0.04  | -0.5  |
| 11.7   | -1.32                                | -2.1  | -1.8  | -0.53 | -0.92 | -1.11 | -1.15 | -1.61 | -0.62 | -0.56 | -0.75 | -1.01 | -0.9  | -0.91 | -0.91 | -1.26 | -0.6  | 0.16  | -0.75 | -1.13 | -2.66 | -1.63 | -0.89 | 0.02  | -0.01 | -0.63 |
| 12.7   | -0.83                                | -1.61 | -1.18 | -0.13 | -0.28 | -0.8  | -0.75 | -1.32 | -0.15 | -0.33 | -0.5  | -0.83 | -0.67 | -0.67 | -0.57 | -1.01 | -0.47 | 0.13  | -0.79 | -0.98 | -2    | -0.86 | -0.57 | 0.33  | 0.07  | -0.59 |
| 13.7   | 0.09                                 | -0.67 | -0.15 | 0.42  | 0.6   | -0.19 | 0     | -0.6  | 0.53  | 0.09  | 0.11  | -0.36 | -0.15 | -0.22 | 0     | -0.49 | -0.16 | 0.16  | -0.59 | -0.6  | -0.93 | 0.15  | -0.07 | 0.65  | 0.24  | -0.41 |
| 14.7   | 1.19                                 | 0.43  | 1.01  | 0.97  | 1.51  | 0.54  | 0.89  | 0.34  | 1.26  | 0.55  | 0.85  | 0.27  | 0.52  | 0.32  | 0.65  | 0.19  | 0.23  | 0.22  | -0.25 | -0.09 | 0.28  | 1.18  | 0.5   | 0.88  | 0.42  | -0.15 |
| 15.7   | 2.13                                 | 1.42  | 1.96  | 1.37  | 2.2   | 1.18  | 1.68  | 1.25  | 1.81  | 0.91  | 1.49  | 0.88  | 1.14  | 0.81  | 1.21  | 0.88  | 0.58  | 0.27  | 0.15  | 0.43  | 1.36  | 2     | 0.98  | 0.95  | 0.53  | 0.12  |
| 16.7   | 2.63                                 | 1.98  | 2.42  | 1.49  | 2.44  | 1.53  | 2.14  | 1.87  | 2.02  | 1.04  | 1.79  | 1.3   | 1.56  | 1.1   | 1.49  | 1.42  | 0.78  | 0.27  | 0.5   | 0.83  | 2.05  | 2.4   | 1.25  | 0.81  | 0.49  | 0.33  |
| 17.7   | 2.45                                 | 1.91  | 2.17  | 1.24  | 2.1   | 1.44  | 2.12  | 2.01  | 1.75  | 0.84  | 1.56  | 1.38  | 1.61  | 1.1   | 1.37  | 1.7   | 0.75  | 0.16  | 0.72  | 1     | 2.15  | 2.24  | 1.21  | 0.43  | 0.24  | 0.43  |
| 18.7   | 1.49                                 | 1.1   | 1.11  | 0.58  | 1.14  | 0.85  | 1.54  | 1.58  | 0.99  | 0.28  | 0.72  | 1.05  | 1.24  | 0.76  | 0.79  | 1.65  | 0.44  | -0.06 | 0.75  | 0.9   | 1.55  | 1.48  | 0.83  | -0.18 | -0.24 | 0.38  |
| 19.7   | -0.19                                | -0.4  | -0.67 | -0.41 | -0.32 | -0.22 | 0.46  | 0.59  | -0.17 | -0.58 | -0.69 | 0.31  | 0.46  | 0.08  | -0.22 | 1.29  | -0.14 | -0.39 | 0.58  | 0.51  | 0.26  | 0.15  | 0.12  | -0.95 | -0.94 | 0.18  |
| 20.7   | -2.35                                | -2.39 | -2.92 | -1.58 | -2.05 | -1.59 | -0.92 | -0.79 | -1.51 | -1.61 | -2.5  | -0.72 | -0.62 | -0.83 | -1.52 | 0.69  | -0.91 | -0.79 | 0.28  | -0.1  | -1.55 | -1.55 | -0.82 | -1.78 | -1.78 | -0.13 |
| 21.7   | -4.56                                | -4.49 | -5.2  | -2.69 | -3.66 | -3.01 | -2.27 | -2.24 | -2.69 | -2.57 | -4.35 | -1.83 | -1.76 | -1.8  | -2.89 | 0.04  | -1.72 | -1.2  | -0.06 | -0.79 | -3.6  | -3.36 | -1.84 | -2.53 | -2.64 | -0.48 |
| 22.7   | -6.23                                | -6.17 | -6.92 | -3.42 | -4.65 | -4.09 | -3.13 | -3.33 | -3.25 | -3.14 | -5.81 | -2.72 | -2.65 | -2.57 | -3.98 | -0.42 | -2.36 | -1.5  | -0.26 | -1.38 | -5.46 | -4.88 | -2.71 | -3.03 | -3.35 | -0.75 |
| 23.7   | -6.62                                | -6.8  | -7.36 | -3.38 | -4.43 | -4.37 | -2.93 | -3.5  | -2.67 | -2.95 | -6.28 | -2.96 | -2.87 | -2.82 | -4.38 | -0.35 | -2.57 | -1.58 | -0.09 | -1.6  | -6.62 | -5.66 | -3.16 | -3.07 | -3.68 | -0.79 |
| 24.7   | -4.92                                | -5.67 | -5.73 | -2.14 | -2.36 | -3.31 | -1.05 | -2.14 | -0.37 | -1.55 | -5.15 | -2.12 | -1.95 | -2.2  | -3.63 | 0.6   | -2.05 | -1.27 | 0.68  | -1.17 | -6.5  | -5.21 | -2.92 | -2.45 | -3.38 | -0.44 |
| 25.7   | -0.28                                | -2.04 | -1.25 | 0.72  | 2.19  | -0.41 | 3.14  | 1.38  | 4.22  | 1.47  | -1.75 | 0.3   | 0.57  | -0.32 | -1.25 | 2.83  | -0.46 | -0.41 | 2.33  | 0.2   | -4.5  | -3.03 | -1.68 | -0.96 | -2.2  | 0.48  |
| 26.7   | 8.06                                 | 4.71  | 6.77  | 5.62  | 9.75  | 4.85  | 10.2  | 7.65  | 11.6  | 6.51  | 4.51  | 4.77  | 5.17  | 3.17  | 3.22  | 6.69  | 2.48  | 1.17  | 5.12  | 2.8   | -0.07 | 1.33  | 0.8   | 1.6   | 0.12  | 2.15  |
| 27.7   | 20.75                                | 15.12 | 18.87 | 12.88 | 20.75 | 12.85 | 20.59 | 17.12 | 22.14 | 13.91 | 14.14 | 11.69 | 12.23 | 8.57  | 10.14 | 12.5  | 7.06  | 3.63  | 9.25  | 6.86  | 7.24  | 8.21  | 4.75  | 5.36  | 3.82  | 4.73  |
| 28.7   | 38.2                                 | 29.48 | 35.35 | 22.73 | 35.4  | 23.84 | 34.59 | 30.11 | 36.07 | 23.89 | 27.44 | 21.35 | 22.03 | 16.12 | 19.79 | 20.47 | 13.48 | 7.08  | 14.88 | 12.55 | 17.73 | 17.83 | 10.27 | 10.44 | 9.06  | 8.32  |
| 29.7   | 60.52                                | 47.82 | 56.18 | 35.25 | 53.68 | 37.88 | 52.23 | 46.65 | 53.38 | 36.51 | 44.51 | 33.89 | 34.67 | 25.9  | 32.25 | 30.69 | 21.84 | 11.63 | 22.07 | 19.94 | 31.49 | 30.22 | 17.38 | 16.87 | 15.97 | 12.99 |
| 30.58  | 84.11                                | 67.1  | 77.91 | 48.45 | 72.61 | 52.69 | 70.66 | 64.04 | 71.27 | 49.77 | 62.56 | 47.32 | 48.15 | 36.38 | 45.52 | 41.54 | 30.82 | 16.59 | 29.69 | 27.83 | 46.23 | 43.33 | 24.9  | 23.64 | 23.46 | 18.01 |
| 31.56  | 114                                  | 91.29 | 105   | 65.19 | 96.12 | 71.4  | 93.75 | 85.94 | 93.5  | 66.53 | 85.42 | 64.56 | 65.38 | 49.82 | 62.46 | 55.37 | 42.39 | 23.1  | 39.38 | 37.91 | 65.06 | 59.91 | 34.4  | 32.23 | 33.2  | 24.49 |
| 32.56  | 147.5                                | 118.2 | 134.9 | 84.1  | 122.1 | 92.38 | 119.5 | 110.4 | 118.1 | 85.41 | 111.1 | 84.26 | 84.97 | 65.18 | 81.67 | 71.06 | 55.7  | 30.78 | 50.36 | 49.38 | 86.37 | 78.52 | 45.06 | 42    | 44.52 | 31.94 |
| 33.64  | 185.6                                | 148.3 | 168.1 | 105.9 | 151.1 | 116.2 | 148.4 | 138   | 145.7 | 107   | 140.4 | 107.1 | 107.6 | 83    | 103.8 | 89.12 | 71.26 | 40.06 | 63.01 | 62.6  | 110.8 | 99.64 | 57.18 | 53.35 | 57.93 | 40.69 |
| 34.58  | 218.7                                | 174   | 196.3 | 125.1 | 176.1 | 136.9 | 173.4 | 161.8 | 169.6 | 126.1 | 165.9 | 127.4 | 127.7 | 98.89 | 123.2 | 105.1 | 85.27 | 48.78 | 74.23 | 74.36 | 132.2 | 118.1 | 67.84 | 63.59 | 70.18 | 48.61 |
| 35.58  | 252.2                                | 199.5 | 224   | 145   | 201.3 | 158   | 198.6 | 185.7 | 193.7 | 145.8 | 191.9 | 148.4 | 148.6 | 115.4 | 143.3 | 121.6 | 100   | 58.48 | 85.9  | 86.61 | 154.3 | 137   | 78.92 | 74.47 | 83.26 | 57.01 |
| 36.56  | 281.7                                | 221.6 | 247.8 | 163.2 | 223.8 | 176.7 | 220.8 | 206.7 | 215.3 | 163.6 | 215.3 | 167.4 | 167.6 | 130.5 | 161.4 | 136.6 | 113.7 | 68.18 | 96.64 | 97.98 | 174.4 | 154.1 | 89.36 | 84.75 | 95.6  | 64.93 |
| 37.65  | 309.3                                | 242.1 | 269.9 | 180.9 | 246.1 | 194.7 | 241.9 | 226.7 | 236.6 | 181.1 | 238   | 185.7 | 186.6 | 145.3 | 178.8 | 151.3 | 127.4 | 78.93 | 107.5 | 109.7 | 194.7 | 171.4 | 100.7 | 95.38 | 108.1 | 73.07 |
| 38.65  | 329.6                                | 258   | 287.1 | 194.6 | 265.2 | 209   | 258.4 | 242.6 | 254.4 | 194.7 | 256.2 | 199.5 | 201.7 | 156.7 | 192.3 | 162.8 | 138.3 | 88.69 | 116.6 | 119.9 | 212.2 | 186.3 | 111.7 | 104.2 | 118   | 79.86 |
| 39.65  | 346.4                                | 273.5 | 304.5 | 206.1 | 285.5 | 222.5 | 274   | 257.9 | 272.5 | 206.6 | 273.7 | 210.4 | 215.5 | 166.2 | 204   | 172.9 | 147.6 | 98.44 | 125.5 | 130.5 | 230.6 | 202.1 | 124.9 | 112.3 | 126   | 86.19 |

| E5    | E6    | E7    | E8    | E9    | F2    | F3    | F4    | F5    | F6    | F7    | F8    | F9    | G2    | G3    |
|-------|-------|-------|-------|-------|-------|-------|-------|-------|-------|-------|-------|-------|-------|-------|
| -7.79 | -5.9  | -2.25 | -5.09 | -2.15 | -7.87 | -6.59 | -6.82 | -3.82 | -5.57 | -4.96 | -9.57 | -6.73 | -10.7 | -8.65 |
| -5    | -3.93 | -3.75 | -4.75 | -1.46 | -4.43 | -3.6  | -3.67 | -3.37 | -4.2  | -3.45 | -4.28 | -4.58 | -4.22 | -4.84 |
| -2.8  | -2.54 | -3.25 | -3.33 | -0.77 | -2.2  | -1.47 | -1.76 | -2.14 | -2.42 | -2.3  | -1.73 | -2.91 | -1.26 | -2.79 |
| -1.16 | -1.48 | -2.13 | -1.74 | -0.31 | -0.72 | -0.03 | -0.54 | -0.86 | -0.81 | -1.36 | -0.44 | -1.57 | -0.01 | -1.53 |
| -0.11 | -0.69 | -1    | -0.42 | -0.14 | 0.11  | 0.74  | 0.17  | 0.12  | 0.34  | -0.6  | 0.12  | -0.57 | 0.25  | -0.74 |
| 0.42  | -0.11 | -0.13 | 0.48  | -0.21 | 0.46  | 0.97  | 0.51  | 0.69  | 0.95  | -0.03 | 0.31  | 0.12  | 0.01  | -0.23 |
| 0.56  | 0.31  | 0.41  | 0.94  | -0.4  | 0.47  | 0.8   | 0.62  | 0.87  | 1.09  | 0.37  | 0.31  | 0.52  | -0.38 | 0.14  |
| 0.46  | 0.61  | 0.65  | 1.06  | -0.6  | 0.31  | 0.41  | 0.59  | 0.74  | 0.9   | 0.63  | 0.26  | 0.71  | -0.7  | 0.41  |
| 0.28  | 0.83  | 0.69  | 0.96  | -0.69 | 0.08  | -0.05 | 0.5   | 0.43  | 0.53  | 0.76  | 0.21  | 0.73  | -0.87 | 0.61  |
| 0.1   | 0.97  | 0.62  | 0.76  | -0.63 | -0.12 | -0.47 | 0.41  | 0.06  | 0.13  | 0.79  | 0.18  | 0.65  | -0.84 | 0.76  |
| 0     | 1.07  | 0.52  | 0.55  | -0.41 | -0.24 | -0.75 | 0.33  | -0.25 | -0.21 | 0.73  | 0.16  | 0.5   | -0.63 | 0.84  |
| 0.01  | 1.1   | 0.46  | 0.39  | -0.05 | -0.25 | -0.87 | 0.28  | -0.46 | -0.42 | 0.62  | 0.15  | 0.32  | -0.31 | 0.84  |
| 0.11  | 1.07  | 0.43  | 0.31  | 0.38  | -0.16 | -0.84 | 0.26  | -0.53 | -0.49 | 0.46  | 0.13  | 0.14  | 0.06  | 0.76  |
| 0.28  | 0.97  | 0.43  | 0.29  | 0.79  | -0.01 | -0.67 | 0.24  | -0.46 | -0.44 | 0.29  | 0.11  | -0.02 | 0.41  | 0.6   |
| 0.46  | 0.79  | 0.4   | 0.29  | 1.11  | 0.17  | -0.44 | 0.2   | -0.3  | -0.32 | 0.1   | 0.08  | -0.14 | 0.67  | 0.35  |
| 0.59  | 0.51  | 0.31  | 0.27  | 1.23  | 0.33  | -0.19 | 0.13  | -0.08 | -0.18 | -0.09 | 0.04  | -0.24 | 0.79  | 0.03  |
| 0.62  | 0.13  | 0.1   | 0.17  | 1.1   | 0.43  | 0     | 0.01  | 0.13  | -0.1  | -0.26 | 0.01  | -0.31 | 0.76  | -0.34 |
| 0.52  | -0.32 | -0.27 | -0.04 | 0.7   | 0.42  | 0.08  | -0.17 | 0.28  | -0.13 | -0.42 | -0.01 | -0.36 | 0.56  | -0.75 |
| 0.28  | -0.84 | -0.8  | -0.38 | 0.04  | 0.31  | 0.02  | -0.39 | 0.32  | -0.29 | -0.57 | -0.01 | -0.39 | 0.22  | -1.17 |
| -0.08 | -1.38 | -1.46 | -0.84 | -0.81 | 0.09  | -0.19 | -0.64 | 0.24  | -0.58 | -0.69 | 0.02  | -0.41 | -0.21 | -1.57 |
| -0.5  | -1.88 | -2.18 | -1.36 | -1.75 | -0.22 | -0.52 | -0.87 | 0.04  | -0.98 | -0.78 | 0.1   | -0.42 | -0.68 | -1.94 |
| -0.89 | -2.26 | -2.86 | -1.86 | -2.63 | -0.54 | -0.93 | -1.03 | -0.24 | -1.4  | -0.85 | 0.23  | -0.42 | -1.11 | -2.24 |
| -1.14 | -2.44 | -3.35 | -2.22 | -3.25 | -0.79 | -1.33 | -1.05 | -0.53 | -1.74 | -0.87 | 0.4   | -0.4  | -1.41 | -2.45 |
| -1.08 | -2.31 | -3.47 | -2.29 | -3.39 | -0.88 | -1.61 | -0.84 | -0.75 | -1.87 | -0.85 | 0.63  | -0.35 | -1.5  | -2.55 |
| -0.57 | -1.73 | -3.01 | -1.9  | -2.84 | -0.68 | -1.64 | -0.3  | -0.77 | -1.63 | -0.75 | 0.93  | -0.24 | -1.31 | -2.5  |
| 0.56  | -0.57 | -1.77 | -0.9  | -1.39 | -0.05 | -1.28 | 0.66  | -0.48 | -0.87 | -0.57 | 1.29  | -0.05 | -0.76 | -2.28 |
| 2.46  | 1.3   | 0.44  | 0.89  | 1.16  | 1.15  | -0.39 | 2.14  | 0.27  | 0.57  | -0.25 | 1.74  | 0.25  | 0.18  | -1.86 |
| 5.26  | 4.02  | 3.79  | 3.59  | 4.94  | 3.04  | 1.15  | 4.25  | 1.58  | 2.79  | 0.23  | 2.31  | 0.7   | 1.53  | -1.21 |
| 9.05  | 7.72  | 8.4   | 7.29  | 10.02 | 5.75  | 3.46  | 7.06  | 3.56  | 5.89  | 0.92  | 3.03  | 1.32  | 3.28  | -0.29 |
| 13.85 | 12.5  | 14.31 | 12.03 | 16.41 | 9.34  | 6.59  | 10.63 | 6.26  | 9.9   | 1.87  | 3.94  | 2.15  | 5.41  | 0.92  |
| 18.93 | 17.68 | 20.6  | 17.06 | 23.07 | 13.29 | 10.06 | 14.45 | 9.25  | 14.17 | 2.97  | 4.94  | 3.08  | 7.53  | 2.28  |
| 25.38 | 24.51 | 28.66 | 23.49 | 31.41 | 18.52 | 14.65 | 19.42 | 13.22 | 19.62 | 4.49  | 6.33  | 4.34  | 10.09 | 4.11  |
| 32.74 | 32.63 | 37.88 | 30.83 | 40.74 | 24.71 | 20.07 | 25.24 | 17.87 | 25.79 | 6.43  | 8.07  | 5.88  | 12.81 | 6.36  |
| 41.3  | 42.59 | 48.69 | 39.41 | 51.39 | 32.23 | 26.59 | 32.26 | 23.41 | 32.93 | 8.97  | 10.36 | 7.83  | 15.76 | 9.22  |
| 49.03 | 52.08 | 58.51 | 47.2  | 60.84 | 39.29 | 32.66 | 38.85 | 28.48 | 39.29 | 11.54 | 12.67 | 9.74  | 18.24 | 12.04 |
| 57.26 | 62.72 | 69.07 | 55.61 | 70.77 | 47.04 | 39.3  | 46.13 | 33.91 | 45.99 | 14.6  | 15.37 | 11.97 | 20.72 | 15.3  |
| 65.13 | 73.28 | 79.28 | 63.85 | 80.24 | 54.55 | 45.77 | 53.26 | 39.07 | 52.33 | 17.8  | 18.07 | 14.29 | 23.03 | 18.61 |
| 73.46 | 84.48 | 90.33 | 73.03 | 90.5  | 62.37 | 52.74 | 60.76 | 44.43 | 59.11 | 21.39 | 20.71 | 16.93 | 25.56 | 22.12 |
| 80.78 | 93.49 | 100.4 | 81.85 | 100.2 | 68.59 | 58.85 | 66.8  | 48.97 | 65.39 | 24.42 | 22.22 | 19.32 | 28.16 | 24.79 |
| 88.12 | 100.3 | 110.9 | 91.8  | 111   | 73.44 | 64.76 | 71.51 | 53.32 | 72.39 | 26.74 | 21.96 | 21.57 | 31.52 | 26.35 |

| Well / | VIC baseline subtracted fluorescence |       |       |       |       |       |       |       |       |       |       |       |       |       |       |       |       |       |       |       |       |       |       |       |       |       |       |       |
|--------|--------------------------------------|-------|-------|-------|-------|-------|-------|-------|-------|-------|-------|-------|-------|-------|-------|-------|-------|-------|-------|-------|-------|-------|-------|-------|-------|-------|-------|-------|
| Cycle  | A7                                   | A8    | A9    | B2    | B4    | B5    | B6    | B8    | B9    | C3    | C4    | C5    | C6    | C7    | C8    | C9    | D3    | D4    | D5    | D6    | D7    | D8    | D9    | E2    | E3    | E4    | E5    | E6    |
| 0.58   | -5.13                                | -4.74 | -4.6  | -1.17 | -0.63 | -2.15 | -1.17 | -1.47 | -1.83 | -0.14 | -1.15 | -0.84 | -2.24 | 1.31  | 0.48  | -0.93 | 0.72  | 1.38  | 2.67  | -0.82 | 0.96  | 7.54  | 1.94  | -2.5  | 3.1   | 0.23  | 2.38  | -1.1  |
| 1.7    | -2.9                                 | -2.82 | -3.6  | -1.73 | -1.72 | -1.95 | -1.65 | -2.29 | -3.35 | -0.91 | -1.77 | -1.99 | -3.11 | -1.86 | -2.19 | -2.33 | -2.15 | -3.13 | -3.6  | -3.49 | -3.28 | -1.36 | -3.51 | -2.99 | 0.08  | -2.47 | -2.18 | -6.74 |
| 2.7    | -1.56                                | -1.41 | -2.47 | -1.35 | -1.18 | -1.17 | -1.07 | -1.79 | -2.57 | -0.57 | -1.17 | -1.33 | -1.84 | -1.78 | -1.82 | -1.64 | -1.72 | -2.65 | -2.43 | -1.6  | -2.17 | -1.66 | -2.85 | -1.49 | 0     | -1.53 | -1.6  | -4.61 |
| 3.7    | -0.69                                | -0.45 | -1.44 | -0.72 | -0.27 | -0.34 | -0.31 | -0.93 | -1.24 | -0.02 | -0.36 | -0.31 | -0.24 | -0.76 | -0.61 | -0.47 | -0.45 | -0.84 | 0.46  | 1.02  | 0.15  | 0.37  | -0.61 | 0.18  | 0.67  | 0.15  | 0.19  | -0.75 |
| 4.7    | -0.18                                | 0.07  | -0.63 | -0.15 | 0.46  | 0.26  | 0.27  | -0.13 | -0.09 | 0.38  | 0.25  | 0.48  | 0.93  | 0.26  | 0.51  | 0.49  | 0.67  | 0.8   | 2.78  | 2.81  | 1.98  | 2.26  | 1.35  | 1.28  | 1.24  | 1.41  | 1.65  | 2.36  |
| 5.7    | 0.09                                 | 0.23  | -0.09 | 0.24  | 0.82  | 0.57  | 0.55  | 0.4   | 0.59  | 0.53  | 0.51  | 0.83  | 1.42  | 0.87  | 1.15  | 0.97  | 1.23  | 1.65  | 3.63  | 3.26  | 2.7   | 3.02  | 2.3   | 1.61  | 1.36  | 1.83  | 2.19  | 3.76  |
| 6.7    | 0.19                                 | 0.14  | 0.22  | 0.41  | 0.8   | 0.61  | 0.54  | 0.64  | 0.76  | 0.43  | 0.45  | 0.75  | 1.27  | 0.97  | 1.23  | 0.95  | 1.21  | 1.64  | 3.01  | 2.5   | 2.32  | 2.53  | 2.16  | 1.28  | 1.02  | 1.47  | 1.8   | 3.44  |
| 7.7    | 0.2                                  | -0.07 | 0.35  | 0.41  | 0.51  | 0.45  | 0.32  | 0.63  | 0.56  | 0.18  | 0.18  | 0.38  | 0.7   | 0.69  | 0.9   | 0.57  | 0.75  | 0.98  | 1.38  | 0.97  | 1.18  | 1.16  | 1.23  | 0.53  | 0.36  | 0.6   | 0.78  | 1.9   |
| 8.7    | 0.16                                 | -0.3  | 0.38  | 0.3   | 0.12  | 0.2   | 0.02  | 0.48  | 0.16  | -0.11 | -0.16 | -0.12 | -0.04 | 0.19  | 0.33  | 0.01  | 0.1   | 0.02  | -0.62 | -0.79 | -0.23 | -0.52 | -0.04 | -0.33 | -0.39 | -0.43 | -0.45 | -0.18 |
| 9.7    | 0.11                                 | -0.47 | 0.36  | 0.15  | -0.25 | -0.07 | -0.26 | 0.26  | -0.25 | -0.35 | -0.45 | -0.57 | -0.71 | -0.32 | -0.25 | -0.54 | -0.5  | -0.9  | -2.41 | -2.3  | -1.49 | -1.96 | -1.22 | -1.05 | -1.04 | -1.31 | -1.51 | -2.13 |
| 10.7   | 0.07                                 | -0.53 | 0.33  | 0.01  | -0.49 | -0.26 | -0.43 | 0.06  | -0.53 | -0.46 | -0.61 | -0.84 | -1.14 | -0.68 | -0.68 | -0.94 | -0.9  | -1.53 | -3.53 | -3.21 | -2.28 | -2.78 | -1.99 | -1.45 | -1.42 | -1.82 | -2.11 | -3.45 |
| 11.7   | 0.05                                 | -0.47 | 0.34  | -0.08 | -0.55 | -0.36 | -0.46 | -0.07 | -0.6  | -0.42 | -0.59 | -0.88 | -1.24 | -0.81 | -0.87 | -1.09 | -0.99 | -1.71 | -3.76 | -3.34 | -2.43 | -2.76 | -2.17 | -1.47 | -1.46 | -1.84 | -2.14 | -3.86 |
| 12.7   | 0.05                                 | -0.32 | 0.37  | -0.1  | -0.41 | -0.35 | -0.34 | -0.1  | -0.45 | -0.24 | -0.41 | -0.68 | -0.99 | -0.68 | -0.77 | -0.99 | -0.76 | -1.41 | -3.09 | -2.73 | -1.94 | -1.94 | -1.75 | -1.11 | -1.16 | -1.41 | -1.59 | -3.32 |
| 13.7   | 0.07                                 | -0.1  | 0.42  | -0.06 | -0.13 | -0.24 | -0.11 | -0.04 | -0.12 | 0.02  | -0.11 | -0.29 | -0.48 | -0.33 | -0.44 | -0.65 | -0.29 | -0.73 | -1.69 | -1.52 | -0.96 | -0.51 | -0.86 | -0.48 | -0.59 | -0.63 | -0.62 | -1.97 |
| 14.7   | 0.08                                 | 0.14  | 0.48  | 0.02  | 0.22  | -0.06 | 0.18  | 0.08  | 0.31  | 0.32  | 0.24  | 0.2   | 0.19  | 0.15  | 0.04  | -0.18 | 0.3   | 0.17  | 0.12  | 0     | 0.26  | 1.22  | 0.3   | 0.28  | 0.13  | 0.3   | 0.55  | -0.14 |
| 15.7   | 0.09                                 | 0.34  | 0.5   | 0.11  | 0.55  | 0.12  | 0.45  | 0.21  | 0.74  | 0.57  | 0.56  | 0.7   | 0.87  | 0.64  | 0.56  | 0.34  | 0.86  | 1.09  | 1.95  | 1.51  | 1.43  | 2.84  | 1.43  | 0.99  | 0.86  | 1.17  | 1.66  | 1.79  |
| 16.7   | 0.07                                 | 0.46  | 0.47  | 0.19  | 0.77  | 0.28  | 0.64  | 0.31  | 1.06  | 0.7   | 0.76  | 1.07  | 1.4   | 1.03  | 0.98  | 0.78  | 1.25  | 1.8   | 3.41  | 2.7   | 2.26  | 3.98  | 2.26  | 1.49  | 1.44  | 1.78  | 2.43  | 3.41  |
| 17.7   | 0.04                                 | 0.46  | 0.37  | 0.22  | 0.82  | 0.37  | 0.7   | 0.34  | 1.18  | 0.68  | 0.78  | 1.25  | 1.67  | 1.2   | 1.21  | 1.06  | 1.35  | 2.12  | 4.2   | 3.29  | 2.53  | 4.35  | 2.59  | 1.67  | 1.77  | 1.97  | 2.67  | 4.39  |
| 18.7   | -0.01                                | 0.33  | 0.19  | 0.18  | 0.65  | 0.38  | 0.59  | 0.27  | 1.06  | 0.47  | 0.61  | 1.17  | 1.62  | 1.11  | 1.17  | 1.09  | 1.09  | 1.96  | 4.12  | 3.16  | 2.1   | 3.8   | 2.3   | 1.46  | 1.77  | 1.68  | 2.27  | 4.52  |
| 19.7   | -0.06                                | 0.09  | -0.06 | 0.09  | 0.27  | 0.31  | 0.32  | 0.12  | 0.71  | 0.12  | 0.25  | 0.84  | 1.25  | 0.75  | 0.87  | 0.88  | 0.5   | 1.29  | 3.19  | 2.31  | 1.01  | 2.36  | 1.41  | 0.89  | 1.44  | 0.93  | 1.25  | 3.77  |
| 20.7   | -0.07                                | -0.22 | -0.33 | -0.04 | -0.25 | 0.21  | -0.05 | -0.1  | 0.18  | -0.31 | -0.22 | 0.3   | 0.65  | 0.2   | 0.35  | 0.45  | -0.33 | 0.22  | 1.61  | 0.92  | -0.58 | 0.31  | 0.11  | 0.09  | 0.86  | -0.12 | -0.24 | 2.35  |
| 21.7   | 0                                    | -0.53 | -0.56 | -0.17 | -0.81 | 0.14  | -0.44 | -0.3  | -0.4  | -0.69 | -0.68 | -0.31 | -0.01 | -0.41 | -0.23 | -0.08 | -1.21 | -1.03 | -0.17 | -0.65 | -2.32 | -1.87 | -1.26 | -0.74 | 0.19  | -1.2  | -1.86 | 0.64  |
| 22.7   | 0.2                                  | -0.75 | -0.69 | -0.22 | -1.23 | 0.21  | -0.7  | -0.38 | -0.84 | -0.87 | -0.96 | -0.82 | -0.46 | -0.86 | -0.67 | -0.55 | -1.86 | -2.13 | -1.53 | -1.86 | -3.69 | -3.48 | -2.19 | -1.3  | -0.34 | -1.93 | -3.18 | -0.72 |
| 23.7   | 0.64                                 | -0.77 | -0.59 | -0.14 | -1.31 | 0.55  | -0.65 | -0.22 | -0.89 | -0.62 | -0.84 | -0.98 | -0.38 | -0.87 | -0.69 | -0.71 | -1.96 | -2.66 | -1.64 | -2.05 | -4.05 | -3.62 | -2.03 | -1.22 | -0.4  | -1.83 | -3.62 | -0.94 |
| 24.7   | 1.38                                 | -0.44 | -0.16 | 0.19  | -0.8  | 1.3   | -0.1  | 0.35  | -0.29 | 0.27  | -0.08 | -0.51 | 0.62  | -0.12 | 0.05  | -0.31 | -1.11 | -2.12 | 0.42  | -0.44 | -2.67 | -1.29 | -0.06 | -0.11 | 0.34  | -0.4  | -2.56 | 0.88  |
| 25.7   | 2.56                                 | 0.35  | 0.74  | 0.86  | 0.54  | 2.63  | 1.2   | 1.5   | 1.26  | 2.07  | 1.6   | 0.88  | 2.94  | 1.74  | 1.89  | 0.96  | 1.09  | -0.02 | 5.65  | 3.75  | 1.22  | 4.55  | 4.48  | 2.43  | 2.26  | 2.88  | 0.66  | 5.69  |
| 26.7   | 4.29                                 | 1.73  | 2.24  | 1.96  | 2.98  | 4.71  | 3.45  | 3.41  | 4.04  | 5     | 4.45  | 3.5   | 6.96  | 5.05  | 5.2   | 3.4   | 5.02  | 4.12  | 14.98 | 11.31 | 8.35  | 14.9  | 12.32 | 6.77  | 5.74  | 8.5   | 6.63  | 14.41 |
| 27.7   | 6.69                                 | 3.82  | 4.46  | 3.56  | 6.73  | 7.68  | 6.89  | 6.23  | 8.3   | 9.3   | 8.71  | 7.63  | 13.06 | 10.11 | 10.3  | 7.28  | 11.01 | 10.71 | 29.22 | 22.9  | 19.36 | 30.61 | 24.08 | 13.21 | 11.09 | 16.82 | 15.87 | 27.78 |
| 28.7   | 9.88                                 | 6.7   | 7.52  | 5.74  | 11.95 | 11.67 | 11.68 | 10.12 | 14.21 | 15.13 | 14.56 | 13.48 | 21.49 | 17.15 | 17.44 | 12.84 | 19.28 | 20.01 | 48.94 | 38.99 | 34.69 | 52.3  | 40.2  | 21.93 | 18.55 | 28.08 | 28.68 | 46.34 |
| 29.7   | 14                                   | 10.4  | 11.5  | 8.5   | 18.75 | 16.76 | 17.95 | 15.17 | 21.86 | 22.61 | 22.12 | 21.19 | 32.41 | 26.31 | 26.78 | 20.22 | 29.91 | 32.1  | 74.39 | 59.78 | 54.55 | 80.22 | 60.87 | 32.94 | 28.24 | 42.31 | 45.16 | 70.27 |
| 30.58  | 18.47                                | 14.35 | 15.82 | 11.42 | 26.06 | 22.2  | 24.76 | 20.62 | 30.06 | 30.6  | 30.25 | 29.58 | 44.11 | 36.15 | 36.88 | 28.29 | 41.21 | 45    | 101.5 | 81.98 | 75.78 | 109.9 | 82.81 | 44.46 | 38.63 | 57.18 | 62.62 | 95.69 |
| 31.56  | 24.39                                | 19.44 | 21.49 | 15.14 | 35.51 | 29.21 | 33.67 | 27.74 | 40.61 | 40.91 | 40.79 | 40.53 | 59.21 | 48.86 | 50    | 38.84 | 55.6  | 61.42 | 136.2 | 110.4 | 103   | 147.9 | 110.8 | 58.91 | 52.01 | 75.81 | 84.74 | 128   |
| 32.56  | 31.52                                | 25.32 | 28.2  | 19.36 | 46.41 | 37.32 | 44.13 | 36.09 | 52.71 | 52.85 | 53.05 | 53.28 | 76.58 | 63.48 | 65.18 | 51.16 | 71.91 | 79.92 | 175.7 | 142.8 | 134   | 190.9 | 142.5 | 75.02 | 67.32 | 96.53 | 109.6 | 164.5 |
| 33.64  | 40.36                                | 32.28 | 36.37 | 24.23 | 59.25 | 46.95 | 56.7  | 46.13 | 66.87 | 67    | 67.65 | 68.43 | 96.97 | 80.6  | 83.07 | 65.79 | 90.64 | 100.9 | 221.3 | 180.3 | 169.9 | 240.6 | 179.1 | 93.18 | 85.11 | 119.8 | 137.7 | 206   |
| 34.58  | 48.89                                | 38.68 | 44.11 | 28.58 | 70.91 | 55.76 | 68.38 | 55.49 | 79.67 | 80    | 81.13 | 82.29 | 115.4 | 96.02 | 99.28 | 79.13 | 107.2 | 119.2 | 261.7 | 213.6 | 201.8 | 284.5 | 211.4 | 108.9 | 101   | 139.9 | 162.2 | 242.1 |
| 35.58  | 58.57                                | 45.65 | 52.76 | 33.12 | 83.34 | 65.22 | 81.15 | 65.74 | 93.26 | 94.01 | 95.79 | 97.14 | 134.9 | 112.2 | 116.4 | 93.3  | 124.1 | 137.5 | 303.5 | 248.2 | 234.9 | 329.7 | 244.7 | 124.8 | 117.4 | 160.1 | 186.9 | 278.7 |
| 36.56  | 68.25                                | 52.5  | 61.39 | 37.34 | 95.09 | 74.14 | 93.5  | 75.74 | 106.1 | 107.4 | 110   | 111.2 | 153.2 | 127.1 | 132.2 | 106.5 | 139.3 | 153.6 | 341.5 | 279.8 | 265   | 370.3 | 274.7 | 139   | 132.3 | 178   | 208.6 | 310.8 |
| 37.65  | 78.59                                | 60.02 | 70.82 | 41.6  | 107.2 | 83.11 | 106.5 | 86.35 | 119.5 | 121.2 | 125   | 125.4 | 171.5 | 141.8 | 147.6 | 119.4 | 153.9 | 168.6 | 378.6 | 310.8 | 294.4 | 409   | 303.3 | 152.9 | 146.6 | 195.2 | 229   | 340.8 |
| 38.65  | 86.82                                | 66.9  | 79.01 | 45.14 | 117.2 | 89.96 | 117.1 | 95.27 | 131.1 | 132.5 | 137.8 | 136.7 | 186.1 | 153   | 159.1 | 129   | 165   | 180   | 407.7 | 335.1 | 317.1 | 437.8 | 324.6 | 164.3 | 157   | 209   | 244.7 | 362.9 |
| 39.65  | 92.74                                | 74    | 86.44 | 48.51 | 126.3 | 95.04 | 126.1 | 103.2 | 142.4 | 141.9 | 149.5 | 146.1 | 198.5 | 161.8 | 167.5 | 136   | 174.4 | 190.4 | 433.1 | 356.4 | 336.6 | 460.6 | 341.5 | 175.8 | 164.9 | 222.8 | 258.8 | 381.7 |

| E7    | E8    | E9    | F2    | F3    | F4    | F5    | F6    | F7    | F8    | F9    | G2    | G3    |
|-------|-------|-------|-------|-------|-------|-------|-------|-------|-------|-------|-------|-------|
| -0.2  | 1.86  | -0.55 | 0.18  | 0.56  | 0.1   | 1.25  | -0.16 | 0.76  | 0.12  | 1.04  | -0.15 | -0.3  |
| -5.9  | -3.75 | -3.48 | -3.14 | -2.6  | -3.52 | -2.46 | -3.8  | -4.12 | -3.34 | -2.36 | -2.98 | -3.52 |
| -3.97 | -2.75 | -2.1  | -2.12 | -1.73 | -2.26 | -1.67 | -2.46 | -2.96 | -2.11 | -1.73 | -1.63 | -2.34 |
| -0.36 | -0.19 | 0.1   | -0.15 | 0.02  | 0.02  | 0.15  | -0.05 | -0.48 | 0.1   | -0.15 | 0.44  | -0.24 |
| 2.5   | 1.89  | 1.72  | 1.4   | 1.39  | 1.76  | 1.59  | 1.82  | 1.47  | 1.78  | 1.13  | 1.87  | 1.41  |
| 3.69  | 2.72  | 2.27  | 2.04  | 1.91  | 2.4   | 2.12  | 2.57  | 2.21  | 2.4   | 1.66  | 2.23  | 2.09  |
| 3.22  | 2.29  | 1.82  | 1.78  | 1.61  | 1.98  | 1.74  | 2.22  | 1.81  | 2     | 1.45  | 1.63  | 1.84  |
| 1.61  | 1.01  | 0.72  | 0.89  | 0.75  | 0.87  | 0.76  | 1.12  | 0.67  | 0.91  | 0.73  | 0.48  | 0.96  |
| -0.46 | -0.59 | -0.58 | -0.22 | -0.29 | -0.49 | -0.46 | -0.28 | -0.68 | -0.42 | -0.15 | -0.78 | -0.15 |
| -2.33 | -1.99 | -1.69 | -1.21 | -1.2  | -1.67 | -1.53 | -1.53 | -1.79 | -1.59 | -0.91 | -1.76 | -1.11 |
| -3.52 | -2.81 | -2.34 | -1.81 | -1.73 | -2.36 | -2.19 | -2.33 | -2.33 | -2.3  | -1.34 | -2.21 | -1.67 |
| -3.78 | -2.87 | -2.38 | -1.88 | -1.76 | -2.41 | -2.3  | -2.51 | -2.19 | -2.4  | -1.33 | -2.04 | -1.7  |
| -3.1  | -2.19 | -1.84 | -1.44 | -1.31 | -1.85 | -1.86 | -2.06 | -1.41 | -1.91 | -0.92 | -1.31 | -1.22 |
| -1.65 | -0.93 | -0.86 | -0.59 | -0.5  | -0.82 | -0.98 | -1.11 | -0.2  | -0.95 | -0.22 | -0.21 | -0.37 |
| 0.22  | 0.62  | 0.32  | 0.47  | 0.49  | 0.44  | 0.14  | 0.13  | 1.14  | 0.24  | 0.59  | 0.99  | 0.64  |
| 2.09  | 2.11  | 1.45  | 1.5   | 1.42  | 1.66  | 1.25  | 1.36  | 2.3   | 1.4   | 1.3   | 2.01  | 1.57  |
| 3.55  | 3.2   | 2.26  | 2.27  | 2.09  | 2.54  | 2.12  | 2.33  | 2.96  | 2.26  | 1.72  | 2.59  | 2.17  |
| 4.25  | 3.62  | 2.57  | 2.6   | 2.32  | 2.89  | 2.56  | 2.81  | 2.95  | 2.63  | 1.71  | 2.57  | 2.27  |
| 4.01  | 3.25  | 2.28  | 2.39  | 2.02  | 2.6   | 2.45  | 2.69  | 2.2   | 2.39  | 1.21  | 1.9   | 1.79  |
| 2.81  | 2.08  | 1.43  | 1.66  | 1.24  | 1.69  | 1.79  | 1.95  | 0.82  | 1.57  | 0.29  | 0.66  | 0.77  |
| 0.87  | 0.35  | 0.21  | 0.55  | 0.1   | 0.34  | 0.71  | 0.77  | -0.89 | 0.32  | -0.9  | -0.88 | -0.63 |
| -1.35 | -1.55 | -1.04 | -0.66 | -1.1  | -1.09 | -0.53 | -0.55 | -2.45 | -1.05 | -2.05 | -2.31 | -2.08 |
| -3.2  | -3.02 | -1.85 | -1.58 | -1.98 | -2.14 | -1.54 | -1.57 | -3.23 | -2.08 | -2.79 | -3.08 | -3.15 |
| -3.82 | -3.34 | -1.64 | -1.72 | -2.04 | -2.2  | -1.84 | -1.71 | -2.51 | -2.23 | -2.64 | -2.58 | -3.32 |
| -2.24 | -1.68 | 0.22  | -0.52 | -0.76 | -0.6  | -0.86 | -0.35 | 0.48  | -0.88 | -1.09 | -0.13 | -1.98 |
| 2.56  | 2.82  | 4.41  | 2.59  | 2.45  | 3.35  | 1.97  | 3.18  | 6.47  | 2.6   | 2.36  | 4.92  | 1.44  |
| 11.54 | 10.95 | 11.52 | 8.14  | 8.08  | 10.26 | 7.19  | 9.5   | 16.08 | 8.79  | 8.15  | 13.12 | 7.49  |
| 25.51 | 23.38 | 22.03 | 16.57 | 16.57 | 20.65 | 15.26 | 19.12 | 29.7  | 18.14 | 16.62 | 24.82 | 16.57 |
| 45.04 | 40.55 | 36.24 | 28.14 | 28.19 | 34.82 | 26.47 | 32.37 | 47.44 | 30.93 | 27.92 | 40.17 | 28.92 |
| 70.32 | 62.59 | 54.22 | 42.93 | 42.99 | 52.84 | 40.93 | 49.34 | 69.06 | 47.22 | 42.03 | 59.01 | 44.54 |
| 97.29 | 85.93 | 73.04 | 58.51 | 58.58 | 71.76 | 56.28 | 67.27 | 90.89 | 64.31 | 56.6  | 78.16 | 60.84 |
| 131.7 | 115.5 | 96.68 | 78.17 | 78.24 | 95.51 | 75.76 | 89.92 | 117.2 | 85.75 | 74.61 | 101.4 | 81.17 |
| 170.5 | 148.9 | 123   | 100.1 | 100.2 | 121.9 | 97.65 | 115.3 | 145.1 | 109.6 | 94.31 | 126.4 | 103.6 |
| 214.9 | 186.8 | 152.8 | 124.9 | 125   | 151.6 | 122.5 | 144   | 174.7 | 136.2 | 116   | 153.1 | 128.5 |
| 253.7 | 219.9 | 178.5 | 146.3 | 146.5 | 176.9 | 144   | 168.7 | 198.3 | 158.9 | 134.3 | 174.8 | 149.6 |
| 292.9 | 253.5 | 204.3 | 167.6 | 167.9 | 201.9 | 165.5 | 193.3 | 219.9 | 181.3 | 152.1 | 195.1 | 170.2 |
| 327.4 | 283.2 | 227.1 | 186   | 186.5 | 223.3 | 184.1 | 214.6 | 236.7 | 200.4 | 167.2 | 211.4 | 187.7 |
| 359.5 | 311.6 | 248.6 | 202.8 | 203.5 | 242.3 | 200.9 | 233.8 | 251   | 217.5 | 181.1 | 225.3 | 203.3 |
| 382.7 | 333.3 | 265.3 | 215   | 215.7 | 255.6 | 212.5 | 247.3 | 262.4 | 229.9 | 192.1 | 236   | 214.8 |
| 401.4 | 352.6 | 280.8 | 225.3 | 225.7 | 266.3 | 221.6 | 258.2 | 277.4 | 240.7 | 203.7 | 248.3 | 225.6 |

| Well / | baseline subtracted fluorescence ratio |       |       |       |       |       |       |       |       |       |       |       |       |       |       |       |       |       |       |       |       |       |       |       |       |       |
|--------|----------------------------------------|-------|-------|-------|-------|-------|-------|-------|-------|-------|-------|-------|-------|-------|-------|-------|-------|-------|-------|-------|-------|-------|-------|-------|-------|-------|
| Cycle  | A7                                     | A8    | A9    | B2    | B4    | B5    | B6    | B8    | B9    | C3    | C4    | C5    | C6    | C7    | C8    | C9    | D3    | D4    | D5    | D6    | D7    | D8    | D9    | E2    | E3    | E4    |
| 26.7   | 8.06                                   | 4.71  | 6.77  | 5.62  | 9.75  | 4.85  | 10.2  | 7.65  | 11.6  | 6.51  | 4.51  | 4.77  | 5.17  | 3.17  | 3.22  | 6.69  | 2.48  | 1.17  | 5.12  | 2.8   | -0.07 | 1.33  | 0.8   | 1.6   | 0.12  | 2.15  |
| 27.7   | 20.75                                  | 15.12 | 18.87 | 12.88 | 20.75 | 12.85 | 20.59 | 17.12 | 22.14 | 13.91 | 14.14 | 11.69 | 12.23 | 8.57  | 10.14 | 12.5  | 7.06  | 3.63  | 9.25  | 6.86  | 7.24  | 8.21  | 4.75  | 5.36  | 3.82  | 4.73  |
| 28.7   | 38.2                                   | 29.48 | 35.35 | 22.73 | 35.4  | 23.84 | 34.59 | 30.11 | 36.07 | 23.89 | 27.44 | 21.35 | 22.03 | 16.12 | 19.79 | 20.47 | 13.48 | 7.08  | 14.88 | 12.55 | 17.73 | 17.83 | 10.27 | 10.44 | 9.06  | 8.32  |
| 29.7   | 60.52                                  | 47.82 | 56.18 | 35.25 | 53.68 | 37.88 | 52.23 | 46.65 | 53.38 | 36.51 | 44.51 | 33.89 | 34.67 | 25.9  | 32.25 | 30.69 | 21.84 | 11.63 | 22.07 | 19.94 | 31.49 | 30.22 | 17.38 | 16.87 | 15.97 | 12.99 |
| 30.58  | 84.11                                  | 67.1  | 77.91 | 48.45 | 72.61 | 52.69 | 70.66 | 64.04 | 71.27 | 49.77 | 62.56 | 47.32 | 48.15 | 36.38 | 45.52 | 41.54 | 30.82 | 16.59 | 29.69 | 27.83 | 46.23 | 43.33 | 24.9  | 23.64 | 23.46 | 18.01 |
| 31.56  | 114                                    | 91.29 | 105   | 65.19 | 96.12 | 71.4  | 93.75 | 85.94 | 93.5  | 66.53 | 85.42 | 64.56 | 65.38 | 49.82 | 62.46 | 55.37 | 42.39 | 23.1  | 39.38 | 37.91 | 65.06 | 59.91 | 34.4  | 32.23 | 33.2  | 24.49 |
| 32.56  | 147.5                                  | 118.2 | 134.9 | 84.1  | 122.1 | 92.38 | 119.5 | 110.4 | 118.1 | 85.41 | 111.1 | 84.26 | 84.97 | 65.18 | 81.67 | 71.06 | 55.7  | 30.78 | 50.36 | 49.38 | 86.37 | 78.52 | 45.06 | 42    | 44.52 | 31.94 |
| 33.64  | 185.6                                  | 148.3 | 168.1 | 105.9 | 151.1 | 116.2 | 148.4 | 138   | 145.7 | 107   | 140.4 | 107.1 | 107.6 | 83    | 103.8 | 89.12 | 71.26 | 40.06 | 63.01 | 62.6  | 110.8 | 99.64 | 57.18 | 53.35 | 57.93 | 40.69 |
|        |                                        |       |       |       |       |       |       |       |       |       |       |       |       |       |       |       |       |       |       |       |       |       |       |       |       |       |
|        |                                        |       |       |       |       |       |       |       |       |       |       |       |       |       |       |       |       |       |       |       |       |       |       |       |       |       |
| 26.7   | 4.29                                   | 1.73  | 2.24  | 1.96  | 2.98  | 4.71  | 3.45  | 3.41  | 4.04  | 5     | 4.45  | 3.5   | 6.96  | 5.05  | 5.2   | 3.4   | 5.02  | 4.12  | 14.98 | 11.31 | 8.35  | 14.9  | 12.32 | 6.77  | 5.74  | 8.5   |
| 27.7   | 6.69                                   | 3.82  | 4.46  | 3.56  | 6.73  | 7.68  | 6.89  | 6.23  | 8.3   | 9.3   | 8.71  | 7.63  | 13.06 | 10.11 | 10.3  | 7.28  | 11.01 | 10.71 | 29.22 | 22.9  | 19.36 | 30.61 | 24.08 | 13.21 | 11.09 | 16.82 |
| 28.7   | 9.88                                   | 6.7   | 7.52  | 5.74  | 11.95 | 11.67 | 11.68 | 10.12 | 14.21 | 15.13 | 14.56 | 13.48 | 21.49 | 17.15 | 17.44 | 12.84 | 19.28 | 20.01 | 48.94 | 38.99 | 34.69 | 52.3  | 40.2  | 21.93 | 18.55 | 28.08 |
| 29.7   | 14                                     | 10.4  | 11.5  | 8.5   | 18.75 | 16.76 | 17.95 | 15.17 | 21.86 | 22.61 | 22.12 | 21.19 | 32.41 | 26.31 | 26.78 | 20.22 | 29.91 | 32.1  | 74.39 | 59.78 | 54.55 | 80.22 | 60.87 | 32.94 | 28.24 | 42.31 |
| 30.58  | 18.47                                  | 14.35 | 15.82 | 11.42 | 26.06 | 22.2  | 24.76 | 20.62 | 30.06 | 30.6  | 30.25 | 29.58 | 44.11 | 36.15 | 36.88 | 28.29 | 41.21 | 45    | 101.5 | 81.98 | 75.78 | 109.9 | 82.81 | 44.46 | 38.63 | 57.18 |
| 31.56  | 24.39                                  | 19.44 | 21.49 | 15.14 | 35.51 | 29.21 | 33.67 | 27.74 | 40.61 | 40.91 | 40.79 | 40.53 | 59.21 | 48.86 | 50    | 38.84 | 55.6  | 61.42 | 136.2 | 110.4 | 103   | 147.9 | 110.8 | 58.91 | 52.01 | 75.81 |
| 32.56  | 31.52                                  | 25.32 | 28.2  | 19.36 | 46.41 | 37.32 | 44.13 | 36.09 | 52.71 | 52.85 | 53.05 | 53.28 | 76.58 | 63.48 | 65.18 | 51.16 | 71.91 | 79.92 | 175.7 | 142.8 | 134   | 190.9 | 142.5 | 75.02 | 67.32 | 96.53 |
| 33.64  | 40.36                                  | 32.28 | 36.37 | 24.23 | 59.25 | 46.95 | 56.7  | 46.13 | 66.87 | 67    | 67.65 | 68.43 | 96.97 | 80.6  | 83.07 | 65.79 | 90.64 | 100.9 | 221.3 | 180.3 | 169.9 | 240.6 | 179.1 | 93.18 | 85.11 | 119.8 |
|        |                                        |       |       |       |       |       |       |       |       |       |       |       |       |       |       |       |       |       |       |       |       |       |       |       |       |       |
|        | 4.489                                  | 4.825 | 4.953 | 4.512 | 2.585 | 2.694 | 2.688 | 3.153 | 2.108 | 1.162 | 2.147 | 1.597 | 1.138 | 1.056 | 1.287 | 1.309 | 0.806 | 0.402 | 0.28  | 0.354 | 0.689 | 0.436 | 0.339 | 0.599 | 0.731 | 0.349 |

| E5    | E6    | E7    | E8    | E9    | F2    | F3    | F4    | F5    | F6    | F7    | F8    | F9    | G2    | G3    |
|-------|-------|-------|-------|-------|-------|-------|-------|-------|-------|-------|-------|-------|-------|-------|
| 2.46  | 1.3   | 0.44  | 0.89  | 1.16  | 1.15  | -0.39 | 2.14  | 0.27  | 0.57  | -0.25 | 1.74  | 0.25  | 0.18  | -1.86 |
| 5.26  | 4.02  | 3.79  | 3.59  | 4.94  | 3.04  | 1.15  | 4.25  | 1.58  | 2.79  | 0.23  | 2.31  | 0.7   | 1.53  | -1.21 |
| 9.05  | 7.72  | 8.4   | 7.29  | 10.02 | 5.75  | 3.46  | 7.06  | 3.56  | 5.89  | 0.92  | 3.03  | 1.32  | 3.28  | -0.29 |
| 13.85 | 12.5  | 14.31 | 12.03 | 16.41 | 9.34  | 6.59  | 10.63 | 6.26  | 9.9   | 1.87  | 3.94  | 2.15  | 5.41  | 0.92  |
| 18.93 | 17.68 | 20.6  | 17.06 | 23.07 | 13.29 | 10.06 | 14.45 | 9.25  | 14.17 | 2.97  | 4.94  | 3.08  | 7.53  | 2.28  |
| 25.38 | 24.51 | 28.66 | 23.49 | 31.41 | 18.52 | 14.65 | 19.42 | 13.22 | 19.62 | 4.49  | 6.33  | 4.34  | 10.09 | 4.11  |
| 32.74 | 32.63 | 37.88 | 30.83 | 40.74 | 24.71 | 20.07 | 25.24 | 17.87 | 25.79 | 6.43  | 8.07  | 5.88  | 12.81 | 6.36  |
| 41.3  | 42.59 | 48.69 | 39.41 | 51.39 | 32.23 | 26.59 | 32.26 | 23.41 | 32.93 | 8.97  | 10.36 | 7.83  | 15.76 | 9.22  |
|       |       |       |       |       |       |       |       |       |       |       |       |       |       |       |
|       |       |       |       |       |       |       |       |       |       |       |       |       |       |       |
| 6.63  | 14.41 | 11.54 | 10.95 | 11.52 | 8.14  | 8.08  | 10.26 | 7.19  | 9.5   | 16.08 | 8.79  | 8.15  | 13.12 | 7.49  |
| 15.87 | 27.78 | 25.51 | 23.38 | 22.03 | 16.57 | 16.57 | 20.65 | 15.26 | 19.12 | 29.7  | 18.14 | 16.62 | 24.82 | 16.57 |
| 28.68 | 46.34 | 45.04 | 40.55 | 36.24 | 28.14 | 28.19 | 34.82 | 26.47 | 32.37 | 47.44 | 30.93 | 27.92 | 40.17 | 28.92 |
| 45.16 | 70.27 | 70.32 | 62.59 | 54.22 | 42.93 | 42.99 | 52.84 | 40.93 | 49.34 | 69.06 | 47.22 | 42.03 | 59.01 | 44.54 |
| 62.62 | 95.69 | 97.29 | 85.93 | 73.04 | 58.51 | 58.58 | 71.76 | 56.28 | 67.27 | 90.89 | 64.31 | 56.6  | 78.16 | 60.84 |
| 84.74 | 128   | 131.7 | 115.5 | 96.68 | 78.17 | 78.24 | 95.51 | 75.76 | 89.92 | 117.2 | 85.75 | 74.61 | 101.4 | 81.17 |
| 109.6 | 164.5 | 170.5 | 148.9 | 123   | 100.1 | 100.2 | 121.9 | 97.65 | 115.3 | 145.1 | 109.6 | 94.31 | 126.4 | 103.6 |
| 137.7 | 206   | 214.9 | 186.8 | 152.8 | 124.9 | 125   | 151.6 | 122.5 | 144   | 174.7 | 136.2 | 116   | 153.1 | 128.5 |
|       |       |       |       |       |       |       |       |       |       |       |       |       |       |       |
| 0.295 | 0.215 | 0.237 | 0.219 | 0.355 | 0.259 | 0.226 | 0.207 | 0.198 | 0.239 | 0.067 | 0.072 | 0.077 | 0.11  | 0.099 |
