# Supplementary material for: Quantify single nucleotide polymorphism (SNP) ratio in pooled DNA based on normalized fluorescence real-time PCR
Source: PubMed Central journal article supplement (PMC1552069; doi:10.1186/1471-2164-7-143), 2006-06-09
Supplement: 1471-2164-7-143-S6.pdf [file 1471-2164-7-143-S6.pdf]

| Well / | FAM baseline subtracted fluorescence |       |       |       |       |       |       |       |       |       |       |       |       |       |       |       |       |       |       |       |       |       |       |       |       |       |
|--------|--------------------------------------|-------|-------|-------|-------|-------|-------|-------|-------|-------|-------|-------|-------|-------|-------|-------|-------|-------|-------|-------|-------|-------|-------|-------|-------|-------|
| Cycle  | C2                                   | C3    | C4    | C5    | C6    | C7    | C8    | C9    | D2    | D3    | D4    | D5    | D6    | D7    | D8    | D9    | E2    | E3    | E4    | E5    | E6    | E7    | E8    | E9    | F2    | F3    |
| 0.56   | -2.56                                | -7.01 | -4.65 | 6.06  | 1.63  | 0.47  | -3.17 | 1.73  | -0.35 | 2.29  | 3.48  | 0.13  | 2.94  | 7.46  | 0.32  | -2.92 | -4.07 | 3.33  | -2.27 | 0.96  | 2.3   | 3.62  | 0.37  | 1.59  | -2.32 | -0.85 |
| 1.56   | -4.35                                | -4.11 | -4.15 | 3.58  | -1.81 | -3.55 | -4.28 | -0.58 | -0.92 | 0.61  | 2.8   | -2.34 | -0.73 | 1.93  | -2.03 | -4.54 | -1.9  | 1.51  | -2.21 | -2.89 | -3.24 | 1.43  | -1.44 | -1.04 | -1.39 | -1.68 |
| 2.56   | -3.92                                | -1.28 | -2.3  | 2.93  | -1.73 | -3.69 | -2.77 | -0.58 | -0.72 | 0.27  | 2.34  | -2.1  | -1.39 | 0.59  | -1.91 | -4.47 | -0.78 | 0.74  | -1.43 | -3.13 | -4.6  | 0.73  | -1.65 | -1.58 | -0.9  | -1.02 |
| 3.56   | -2.86                                | 0.4   | -0.78 | 2.42  | -0.77 | -2.58 | -1.04 | -0.08 | -0.51 | 0.17  | 1.72  | -1.17 | -1.06 | 0.65  | -1.21 | -3.83 | -0.4  | 0.33  | -0.68 | -2.08 | -4.01 | 0.44  | -1.25 | -1.28 | -0.76 | -0.1  |
| 4.56   | -1.88                                | 0.78  | -0.15 | 1.47  | -0.12 | -1.47 | -0.08 | 0.17  | -0.51 | -0.08 | 0.86  | -0.47 | -0.72 | 0.76  | -0.76 | -3.09 | -0.43 | -0.01 | -0.26 | -0.93 | -2.79 | 0.13  | -0.72 | -0.8  | -0.85 | 0.54  |
| 5.56   | -1.2                                 | 0.2   | -0.3  | 0.12  | -0.07 | -0.8  | 0     | 0.02  | -0.7  | -0.53 | -0.08 | -0.27 | -0.67 | 0.46  | -0.73 | -2.38 | -0.61 | -0.33 | -0.14 | -0.17 | -1.56 | -0.29 | -0.27 | -0.4  | -1.01 | 0.72  |
| 6.56   | -0.76                                | -0.81 | -0.83 | -1.31 | -0.47 | -0.51 | -0.49 | -0.38 | -0.94 | -0.99 | -0.94 | -0.45 | -0.85 | -0.18 | -0.97 | -1.65 | -0.76 | -0.58 | -0.2  | 0.14  | -0.57 | -0.74 | 0.07  | -0.14 | -1.09 | 0.51  |
| 7.56   | -0.39                                | -1.72 | -1.3  | -2.44 | -0.95 | -0.36 | -1.07 | -0.74 | -1.05 | -1.27 | -1.53 | -0.75 | -1.08 | -0.89 | -1.19 | -0.81 | -0.74 | -0.69 | -0.27 | 0.16  | 0.16  | -1.07 | 0.35  | 0.05  | -1.02 | 0.1   |
| 8.56   | 0.05                                 | -2.14 | -1.37 | -2.96 | -1.19 | -0.11 | -1.34 | -0.86 | -0.91 | -1.21 | -1.75 | -0.91 | -1.12 | -1.37 | -1.16 | 0.19  | -0.52 | -0.59 | -0.21 | 0.09  | 0.7   | -1.15 | 0.63  | 0.24  | -0.74 | -0.33 |
| 9.56   | 0.63                                 | -1.89 | -0.87 | -2.73 | -0.95 | 0.4   | -1.07 | -0.59 | -0.51 | -0.76 | -1.57 | -0.78 | -0.86 | -1.4  | -0.75 | 1.32  | -0.13 | -0.27 | 0.06  | 0.12  | 1.14  | -0.92 | 0.94  | 0.49  | -0.3  | -0.63 |
| 10.56  | 1.34                                 | -1    | 0.16  | -1.81 | -0.22 | 1.19  | -0.23 | 0.05  | 0.13  | 0.03  | -1.07 | -0.28 | -0.26 | -0.93 | 0.06  | 2.47  | 0.36  | 0.2   | 0.51  | 0.34  | 1.54  | -0.4  | 1.27  | 0.81  | 0.24  | -0.7  |
| 11.56  | 2.06                                 | 0.33  | 1.51  | -0.42 | 0.88  | 2.11  | 1.03  | 0.93  | 0.86  | 1     | -0.36 | 0.49  | 0.58  | -0.05 | 1.11  | 3.47  | 0.85  | 0.75  | 1.06  | 0.73  | 1.9   | 0.3   | 1.56  | 1.16  | 0.79  | -0.54 |
| 12.56  | 2.61                                 | 1.78  | 2.83  | 1.13  | 2.09  | 2.96  | 2.4   | 1.82  | 1.5   | 1.92  | 0.37  | 1.35  | 1.48  | 1.04  | 2.19  | 4.11  | 1.2   | 1.23  | 1.58  | 1.21  | 2.17  | 1.03  | 1.74  | 1.44  | 1.21  | -0.2  |
| 13.56  | 2.8                                  | 2.96  | 3.74  | 2.43  | 3.06  | 3.43  | 3.5   | 2.47  | 1.89  | 2.56  | 0.97  | 2.07  | 2.21  | 2.03  | 3.02  | 4.18  | 1.33  | 1.51  | 1.91  | 1.62  | 2.25  | 1.6   | 1.7   | 1.57  | 1.41  | 0.22  |
| 14.56  | 2.45                                 | 3.5   | 3.87  | 3.13  | 3.46  | 3.25  | 3.93  | 2.62  | 1.84  | 2.68  | 1.27  | 2.38  | 2.52  | 2.61  | 3.31  | 3.51  | 1.14  | 1.46  | 1.9   | 1.77  | 2.05  | 1.83  | 1.37  | 1.43  | 1.28  | 0.59  |
| 15.56  | 1.43                                 | 3.14  | 2.99  | 2.94  | 3.02  | 2.23  | 3.42  | 2.09  | 1.25  | 2.12  | 1.17  | 2.09  | 2.22  | 2.52  | 2.88  | 2.03  | 0.6   | 1.01  | 1.44  | 1.52  | 1.49  | 1.57  | 0.68  | 0.94  | 0.79  | 0.78  |
| 16.58  | -0.29                                | 1.72  | 0.95  | 1.7   | 1.57  | 0.26  | 1.75  | 0.78  | 0.08  | 0.79  | 0.65  | 1.05  | 1.19  | 1.59  | 1.61  | -0.27 | -0.28 | 0.11  | 0.45  | 0.72  | 0.51  | 0.73  | -0.4  | 0.07  | -0.08 | 0.7   |
| 17.58  | -2.53                                | -0.62 | -2.02 | -0.47 | -0.76 | -2.45 | -0.92 | -1.14 | -1.53 | -1.15 | -0.2  | -0.68 | -0.51 | -0.14 | -0.38 | -3.09 | -1.38 | -1.11 | -0.97 | -0.57 | -0.8  | -0.63 | -1.74 | -1.1  | -1.22 | 0.31  |
| 18.58  | -5.02                                | -3.55 | -5.51 | -3.28 | -3.68 | -5.6  | -4.31 | -3.43 | -3.37 | -3.5  | -1.17 | -2.91 | -2.69 | -2.45 | -2.82 | -6.13 | -2.53 | -2.52 | -2.68 | -2.24 | -2.33 | -2.37 | -3.24 | -2.46 | -2.52 | -0.37 |
| 19.58  | -7.35                                | -6.51 | -8.85 | -6.19 | -6.64 | -8.63 | -7.83 | -5.6  | -5.08 | -5.84 | -1.96 | -5.28 | -4.98 | -4.91 | -5.25 | -8.87 | -3.52 | -3.85 | -4.42 | -4.04 | -3.83 | -4.23 | -4.65 | -3.79 | -3.77 | -1.22 |
| 20.58  | -8.93                                | -8.69 | -11.1 | -8.42 | -8.85 | -10.7 | -10.7 | -7.03 | -6.18 | -7.6  | -2.14 | -7.25 | -6.85 | -6.87 | -7.02 | -10.7 | -4.03 | -4.73 | -5.81 | -5.54 | -4.98 | -5.83 | -5.66 | -4.78 | -4.7  | -2.04 |
| 21.58  | -9.06                                | -9.11 | -11.1 | -9.02 | -9.3  | -11   | -11.8 | -6.92 | -6.12 | -8.08 | -1.22 | -8.1  | -7.63 | -7.5  | -7.3  | -10.8 | -3.72 | -4.73 | -6.39 | -6.23 | -5.32 | -6.67 | -5.9  | -5.05 | -5    | -2.55 |
| 22.58  | -7                                   | -6.63 | -7.58 | -6.9  | -6.84 | -8.3  | -10.2 | -4.41 | -4.24 | -6.48 | 1.38  | -7.02 | -6.51 | -5.83 | -5.19 | -8.37 | -2.2  | -3.33 | -5.63 | -5.46 | -4.34 | -6.2  | -4.94 | -4.16 | -4.33 | -2.4  |
| 23.58  | -1.96                                | -0.08 | 0.85  | -0.91 | -0.25 | -1.52 | -4.39 | 1.42  | 0.13  | -1.96 | 6.24  | -3.13 | -2.65 | -0.79 | 0.3   | -2.61 | 0.93  | -0.01 | -2.95 | -2.55 | -1.5  | -3.8  | -2.32 | -1.66 | -2.31 | -1.21 |
| 24.58  | 6.81                                 | 11.69 | 15.52 | 10.06 | 11.67 | 10.42 | 6.56  | 11.43 | 7.61  | 6.31  | 13.93 | 4.47  | 4.79  | 8.67  | 10.11 | 7.27  | 6.07  | 5.76  | 2.22  | 3.21  | 3.77  | 1.12  | 2.41  | 2.9   | 1.39  | 1.43  |
| 25.58  | 19.92                                | 29.68 | 37.59 | 26.99 | 30    | 28.48 | 23.71 | 26.33 | 18.78 | 19.08 | 24.95 | 16.6  | 16.59 | 23.51 | 25.07 | 21.93 | 13.57 | 14.5  | 10.39 | 12.48 | 12    | 9.14  | 9.65  | 9.94  | 7.09  | 5.92  |
| 26.58  | 37.79                                | 54.64 | 67.95 | 50.61 | 55.56 | 53.38 | 47.73 | 46.64 | 34.06 | 36.94 | 39.69 | 33.91 | 33.36 | 44.49 | 45.79 | 41.82 | 23.73 | 26.59 | 21.97 | 25.79 | 23.62 | 20.69 | 19.74 | 19.76 | 15.04 | 12.6  |
| 27.58  | 60.62                                | 86.97 | 107.1 | 81.33 | 88.84 | 85.48 | 78.94 | 72.58 | 53.7  | 60.27 | 58.38 | 56.84 | 55.49 | 72.1  | 72.64 | 67.15 | 36.77 | 42.35 | 37.25 | 43.5  | 38.93 | 36.1  | 32.89 | 32.56 | 25.4  | 21.7  |
| 28.56  | 87.65                                | 125.7 | 154   | 118.3 | 129   | 123.8 | 116.3 | 103.3 | 77.16 | 88.5  | 80.56 | 84.87 | 82.45 | 105.7 | 104.8 | 97.11 | 52.44 | 61.43 | 55.89 | 65.24 | 57.62 | 55.03 | 48.8  | 48.02 | 37.93 | 33.11 |
| 29.61  | 121.2                                | 174.5 | 213   | 164.8 | 179.6 | 171.9 | 162.9 | 141.4 | 106.6 | 124.4 | 108.4 | 120.8 | 116.9 | 148.4 | 145.3 | 134.4 | 72.38 | 85.82 | 79.76 | 93.16 | 81.59 | 79.41 | 69.06 | 67.62 | 53.88 | 48.02 |
| 30.56  | 155                                  | 224.2 | 273.4 | 212.4 | 231.5 | 220.8 | 210   | 179.7 | 136.8 | 161.4 | 136.8 | 158   | 152.4 | 192.6 | 186.7 | 172.1 | 93.14 | 111.2 | 104.6 | 122.2 | 106.6 | 104.9 | 90.06 | 87.79 | 70.43 | 63.78 |
| 31.63  | 195.3                                | 284.2 | 346.6 | 269.8 | 294.5 | 279.6 | 266   | 225.2 | 173.3 | 206.8 | 171.5 | 203.9 | 196   | 246.6 | 236.7 | 217.2 | 119   | 142.8 | 135.2 | 158   | 137.5 | 136.4 | 116   | 112.4 | 90.87 | 83.52 |
| 32.63  | 234.2                                | 342.9 | 418.8 | 326.2 | 356.4 | 337   | 319.7 | 269   | 209.4 | 252   | 206.1 | 249.7 | 239.4 | 300.2 | 285.8 | 261.3 | 145.5 | 174.7 | 166   | 193.9 | 168.7 | 168.2 | 142   | 137   | 111.5 | 103.6 |
| 33.63  | 272.6                                | 401.4 | 491.6 | 382.8 | 418.5 | 394.1 | 372.2 | 311.9 | 245.9 | 298.1 | 241.7 | 296.5 | 283.5 | 354.7 | 335   | 305.2 | 173.4 | 208.1 | 197.7 | 230.7 | 201   | 201.2 | 169   | 162   | 133   | 124.6 |
| 34.63  | 308.9                                | 457.7 | 562.5 | 437.7 | 478.5 | 448.9 | 421.2 | 352.3 | 281.6 | 343.6 | 277.3 | 342.9 | 326.9 | 408.3 | 382.8 | 347.6 | 202.2 | 241.8 | 229.4 | 267.1 | 233.5 | 234.5 | 196.1 | 186.8 | 154.7 | 145.8 |
| 35.63  | 342.4                                | 510   | 629.3 | 489.4 | 534.5 | 499.6 | 465.6 | 389.1 | 315.5 | 386.9 | 312.2 | 387.4 | 368.3 | 459.4 | 427.8 | 387.1 | 231.3 | 275.1 | 260.3 | 302.1 | 265.3 | 267.3 | 222.7 | 210.8 | 176.1 | 166.8 |
| 36.63  | 372.7                                | 557.3 | 691   | 537.5 | 585.4 | 545.6 | 505.5 | 422.1 | 347   | 427.1 | 346.2 | 429.3 | 407   | 507.6 | 469.7 | 423.4 | 260   | 307.1 | 289.8 | 335.2 | 296.1 | 299.3 | 248.5 | 233.8 | 196.9 | 187.4 |
| 37.65  | 401.8                                | 601.6 | 749.3 | 584.8 | 633.1 | 589   | 544.3 | 453.6 | 377.1 | 465   | 380.4 | 470   | 444.5 | 554.8 | 510.5 | 458   | 288.8 | 338.3 | 318.6 | 367.5 | 326.8 | 331.7 | 274.1 | 256.8 | 217.6 | 208.3 |
| 38.65  | 431.6                                | 644.2 | 804.7 | 632.9 | 678.5 | 631.1 | 586.1 | 486   | 405.7 | 500.1 | 414.7 | 509.7 | 481   | 602   | 551.7 | 491.7 | 316.1 | 367.5 | 346.5 | 399.4 | 357.3 | 364.6 | 299.1 | 280.2 | 237.5 | 229.6 |
| 39.65  | 468.7                                | 693   | 865.7 | 691.1 | 729.9 | 680.5 | 642.7 | 527.5 | 437   | 536.6 | 453.1 | 554   | 522.4 | 657.1 | 600.8 | 530.4 | 343.3 | 396.8 | 376.6 | 435.6 | 391.1 | 402.1 | 326.4 | 307.6 | 258.4 | 254.2 |

| F4    | F5    | F6    | F7    | F8    | F9    | G2    | G3    | G4    | G5    |
|-------|-------|-------|-------|-------|-------|-------|-------|-------|-------|
| -5.18 | -6.11 | -0.6  | 6.32  | -1.12 | -1.31 | 1.3   | -7.77 | 0.44  | -3.7  |
| -1.04 | -3.95 | -0.1  | 3.65  | -3.46 | -2.47 | -1.33 | -4.05 | -0.68 | -2.28 |
| 0.58  | -2.41 | -0.28 | 1.56  | -3.62 | -2.51 | -2.35 | -2.15 | -0.93 | -1.18 |
| 0.73  | -1.41 | -0.73 | 0     | -2.84 | -2.06 | -2.4  | -1.27 | -0.82 | -0.45 |
| 0.17  | -0.82 | -1.17 | -1.03 | -1.81 | -1.45 | -1.92 | -0.89 | -0.62 | -0.08 |
| -0.56 | -0.49 | -1.42 | -1.55 | -0.89 | -0.86 | -1.2  | -0.67 | -0.44 | 0.04  |
| -1.11 | -0.27 | -1.4  | -1.58 | -0.2  | -0.33 | -0.44 | -0.43 | -0.31 | 0     |
| -1.33 | -0.06 | -1.1  | -1.19 | 0.28  | 0.13  | 0.25  | -0.1  | -0.21 | -0.08 |
| -1.18 | 0.19  | -0.57 | -0.49 | 0.6   | 0.54  | 0.8   | 0.31  | -0.12 | -0.15 |
| -0.71 | 0.5   | 0.11  | 0.4   | 0.82  | 0.89  | 1.19  | 0.74  | -0.01 | -0.14 |
| -0.04 | 0.84  | 0.81  | 1.32  | 0.99  | 1.19  | 1.41  | 1.13  | 0.14  | -0.06 |
| 0.66  | 1.14  | 1.44  | 2.11  | 1.11  | 1.41  | 1.45  | 1.4   | 0.32  | 0.08  |
| 1.24  | 1.32  | 1.87  | 2.63  | 1.18  | 1.49  | 1.34  | 1.46  | 0.48  | 0.23  |
| 1.56  | 1.31  | 2.02  | 2.74  | 1.16  | 1.42  | 1.08  | 1.26  | 0.59  | 0.34  |
| 1.5   | 1.03  | 1.83  | 2.37  | 0.99  | 1.14  | 0.68  | 0.78  | 0.6   | 0.34  |
| 1.03  | 0.46  | 1.28  | 1.48  | 0.62  | 0.65  | 0.15  | 0.01  | 0.46  | 0.18  |
| 0.11  | -0.45 | 0.38  | 0.07  | 0.04  | -0.05 | -0.51 | -1.04 | 0.13  | -0.18 |
| -1.13 | -1.58 | -0.76 | -1.73 | -0.72 | -0.89 | -1.25 | -2.27 | -0.41 | -0.76 |
| -2.55 | -2.87 | -2.05 | -3.78 | -1.61 | -1.77 | -2.08 | -3.62 | -1.14 | -1.55 |
| -3.96 | -4.14 | -3.33 | -5.88 | -2.52 | -2.58 | -2.94 | -4.98 | -2.02 | -2.49 |
| -5.09 | -5.2  | -4.4  | -7.78 | -3.27 | -3.12 | -3.81 | -6.23 | -2.98 | -3.52 |
| -5.61 | -5.78 | -5.05 | -9.2  | -3.65 | -3.21 | -4.62 | -7.24 | -3.91 | -4.54 |
| -5.21 | -5.61 | -5.02 | -9.84 | -3.42 | -2.63 | -5.29 | -7.88 | -4.68 | -5.41 |
| -3.53 | -4.38 | -4.08 | -9.42 | -2.3  | -1.16 | -5.74 | -8.02 | -5.14 | -6.01 |
| -0.23 | -1.78 | -1.97 | -7.66 | -0.03 | 1.4   | -5.86 | -7.52 | -5.11 | -6.17 |
| 4.99  | 2.46  | 1.52  | -4.36 | 3.63  | 5.22  | -5.52 | -6.27 | -4.43 | -5.75 |
| 12.39 | 8.59  | 6.57  | 0.63  | 8.88  | 10.41 | -4.61 | -4.19 | -2.93 | -4.65 |
| 22.15 | 16.8  | 13.34 | 7.36  | 15.81 | 17.02 | -2.99 | -1.21 | -0.46 | -2.75 |
| 34.09 | 26.95 | 21.72 | 15.58 | 24.27 | 24.8  | -0.59 | 2.63  | 2.98  | -0.06 |
| 49.49 | 40.14 | 32.61 | 26.03 | 35.04 | 34.44 | 3     | 7.76  | 7.87  | 3.72  |
| 65.69 | 54.11 | 44.16 | 36.73 | 46.15 | 44.12 | 7.24  | 13.32 | 13.41 | 7.92  |
| 86.04 | 71.75 | 58.77 | 49.69 | 59.69 | 55.64 | 13.17 | 20.48 | 20.79 | 13.37 |
| 107   | 90    | 73.96 | 62.47 | 73.1  | 66.78 | 19.9  | 28.07 | 28.8  | 19.09 |
| 129.4 | 109.5 | 90.24 | 75.41 | 86.67 | 77.8  | 27.68 | 36.37 | 37.72 | 25.21 |
| 152.7 | 129.8 | 107.3 | 88.23 | 99.94 | 88.39 | 36.39 | 45.26 | 47.43 | 31.56 |
| 176.4 | 150.5 | 124.6 | 100.8 | 112.6 | 98.34 | 45.79 | 54.58 | 57.82 | 38.01 |
| 200.2 | 171.4 | 142   | 113.4 | 124.6 | 107.8 | 55.52 | 64.19 | 68.85 | 44.53 |
| 224.4 | 192.8 | 159.4 | 126.9 | 136.6 | 117.4 | 65.33 | 74.15 | 80.93 | 51.44 |
| 247.9 | 213.9 | 175.8 | 142.2 | 149   | 127.8 | 74.08 | 83.82 | 93.81 | 58.81 |
| 271.6 | 236   | 191.5 | 162   | 164.4 | 141.5 | 81.2  | 93.28 | 108.5 | 67.6  |

| Well / | VIC baseline subtracted fluorescence |       |       |       |       |       |       |       |       |       |       |       |       |       |       |       |       |       |       |       |       |       |       |       |       |       |
|--------|--------------------------------------|-------|-------|-------|-------|-------|-------|-------|-------|-------|-------|-------|-------|-------|-------|-------|-------|-------|-------|-------|-------|-------|-------|-------|-------|-------|
| Cycle  | C2                                   | C3    | C4    | C5    | C6    | C7    | C8    | C9    | D2    | D3    | D4    | D5    | D6    | D7    | D8    | D9    | E2    | E3    | E4    | E5    | E6    | E7    | E8    | E9    | F2    | F3    |
| 0.56   | -2.3                                 | -1.56 | -2.12 | 0.75  | 0.75  | -1.4  | 0.53  | 0.79  | -1.28 | 1.11  | 1.68  | 4.1   | 3.71  | 4.4   | 1.24  | -3.53 | -0.01 | 2.7   | 4.51  | 3.72  | 1.7   | -1.83 | 0.5   | -0.72 | 0.76  | 1.48  |
| 1.56   | -2                                   | -1.2  | -2.13 | 0.23  | -2.52 | -1.18 | -1.94 | -0.71 | -1.84 | -0.95 | -1.02 | -1.97 | -2.18 | -0.84 | -1.2  | -5.7  | -1    | -1.14 | -2.65 | -1.73 | -2.96 | -3.96 | -3.43 | -2.86 | -1.34 | -1.73 |
| 2.56   | -1.38                                | -0.54 | -1.56 | 0.26  | -2.61 | -0.35 | -2.07 | -1.03 | -1.17 | -1    | -1.06 | -2.29 | -2.47 | -1.19 | -0.17 | -4.01 | -0.65 | -1.12 | -3.14 | -2.45 | -2.18 | -2.68 | -2.88 | -2.17 | -0.66 | -1.39 |
| 3.56   | -0.74                                | 0.04  | -0.84 | 0.42  | -1.46 | 0.39  | -1.27 | -0.84 | -0.28 | -0.38 | -0.23 | -0.62 | -0.8  | 0.06  | 1.53  | -1.41 | -0.02 | 0.09  | -1.23 | -1.35 | 0.09  | -0.68 | -1.01 | -0.73 | 0.6   | -0.07 |
| 4.56   | -0.23                                | 0.37  | -0.18 | 0.52  | -0.17 | 0.75  | -0.31 | -0.51 | 0.34  | 0.21  | 0.52  | 1.05  | 0.88  | 1.21  | 2.57  | 0.64  | 0.38  | 1.12  | 0.78  | -0.01 | 1.86  | 0.76  | 0.59  | 0.42  | 1.39  | 0.99  |
| 5.56   | 0.12                                 | 0.44  | 0.3   | 0.47  | 0.74  | 0.7   | 0.41  | -0.22 | 0.57  | 0.51  | 0.85  | 1.88  | 1.74  | 1.6   | 2.56  | 1.63  | 0.42  | 1.47  | 1.9   | 0.86  | 2.42  | 1.26  | 1.32  | 0.94  | 1.44  | 1.34  |
| 6.56   | 0.3                                  | 0.3   | 0.58  | 0.31  | 1.12  | 0.34  | 0.79  | -0.03 | 0.44  | 0.48  | 0.72  | 1.74  | 1.64  | 1.19  | 1.64  | 1.64  | 0.19  | 1.14  | 1.98  | 1.1   | 1.84  | 0.94  | 1.22  | 0.86  | 0.88  | 1.02  |
| 7.56   | 0.36                                 | 0.04  | 0.67  | 0.08  | 1.04  | -0.17 | 0.86  | 0.08  | 0.11  | 0.23  | 0.29  | 0.91  | 0.86  | 0.26  | 0.23  | 1     | -0.17 | 0.37  | 1.27  | 0.84  | 0.55  | 0.16  | 0.59  | 0.42  | 0.01  | 0.3   |
| 8.56   | 0.36                                 | -0.24 | 0.63  | -0.15 | 0.67  | -0.67 | 0.71  | 0.14  | -0.27 | -0.1  | -0.23 | -0.21 | -0.22 | -0.79 | -1.21 | 0.13  | -0.49 | -0.5  | 0.22  | 0.34  | -0.92 | -0.67 | -0.19 | -0.11 | -0.82 | -0.48 |
| 9.56   | 0.32                                 | -0.46 | 0.5   | -0.32 | 0.19  | -1.02 | 0.48  | 0.2   | -0.55 | -0.37 | -0.65 | -1.23 | -1.21 | -1.62 | -2.29 | -0.61 | -0.65 | -1.17 | -0.77 | -0.16 | -2.07 | -1.22 | -0.77 | -0.51 | -1.36 | -1.04 |
| 10.56  | 0.28                                 | -0.58 | 0.33  | -0.4  | -0.22 | -1.15 | 0.26  | 0.27  | -0.67 | -0.5  | -0.85 | -1.85 | -1.82 | -1.98 | -2.79 | -0.99 | -0.6  | -1.47 | -1.37 | -0.46 | -2.62 | -1.32 | -0.96 | -0.63 | -1.45 | -1.21 |
| 11.56  | 0.26                                 | -0.58 | 0.15  | -0.39 | -0.48 | -1.04 | 0.11  | 0.36  | -0.59 | -0.45 | -0.77 | -1.95 | -1.91 | -1.81 | -2.62 | -0.92 | -0.34 | -1.33 | -1.43 | -0.49 | -2.44 | -0.94 | -0.71 | -0.45 | -1.11 | -0.96 |
| 12.56  | 0.25                                 | -0.46 | 0     | -0.29 | -0.54 | -0.73 | 0.05  | 0.45  | -0.35 | -0.24 | -0.44 | -1.53 | -1.47 | -1.16 | -1.88 | -0.47 | 0.06  | -0.8  | -0.99 | -0.24 | -1.63 | -0.18 | -0.1  | -0.02 | -0.42 | -0.37 |
| 13.56  | 0.24                                 | -0.27 | -0.12 | -0.13 | -0.43 | -0.29 | 0.06  | 0.5   | -0.01 | 0.06  | 0.04  | -0.75 | -0.64 | -0.2  | -0.76 | 0.21  | 0.49  | -0.04 | -0.18 | 0.18  | -0.41 | 0.74  | 0.66  | 0.51  | 0.41  | 0.4   |
| 14.56  | 0.22                                 | -0.04 | -0.21 | 0.04  | -0.2  | 0.19  | 0.1   | 0.49  | 0.34  | 0.36  | 0.54  | 0.17  | 0.39  | 0.81  | 0.47  | 0.9   | 0.83  | 0.75  | 0.75  | 0.63  | 0.9   | 1.58  | 1.35  | 0.98  | 1.16  | 1.14  |
| 15.56  | 0.18                                 | 0.17  | -0.26 | 0.2   | 0.06  | 0.62  | 0.12  | 0.38  | 0.6   | 0.56  | 0.93  | 0.98  | 1.35  | 1.62  | 1.54  | 1.36  | 0.99  | 1.35  | 1.54  | 0.95  | 1.97  | 2.09  | 1.73  | 1.24  | 1.63  | 1.65  |
| 16.58  | 0.09                                 | 0.33  | -0.27 | 0.3   | 0.27  | 0.93  | 0.06  | 0.16  | 0.69  | 0.59  | 1.09  | 1.46  | 2.06  | 2.01  | 2.23  | 1.43  | 0.88  | 1.61  | 1.96  | 1.02  | 2.53  | 2.08  | 1.62  | 1.17  | 1.68  | 1.76  |
| 17.58  | -0.02                                | 0.4   | -0.24 | 0.33  | 0.35  | 1.05  | -0.1  | -0.15 | 0.6   | 0.42  | 0.97  | 1.42  | 2.33  | 1.85  | 2.41  | 1.02  | 0.51  | 1.43  | 1.84  | 0.76  | 2.4   | 1.52  | 1     | 0.74  | 1.25  | 1.42  |
| 18.58  | -0.15                                | 0.38  | -0.15 | 0.31  | 0.3   | 1     | -0.34 | -0.53 | 0.32  | 0.05  | 0.57  | 0.88  | 2.14  | 1.17  | 2.13  | 0.21  | -0.04 | 0.84  | 1.21  | 0.23  | 1.62  | 0.5   | -0.03 | 0.04  | 0.46  | 0.7   |
| 19.58  | -0.27                                | 0.32  | 0.02  | 0.27  | 0.16  | 0.84  | -0.61 | -0.88 | -0.04 | -0.41 | 0     | -0.04 | 1.6   | 0.12  | 1.61  | -0.78 | -0.63 | 0.01  | 0.24  | -0.43 | 0.42  | -0.7  | -1.18 | -0.72 | -0.45 | -0.2  |
| 20.58  | -0.3                                 | 0.25  | 0.31  | 0.28  | 0.05  | 0.69  | -0.79 | -1.1  | -0.35 | -0.81 | -0.55 | -1.05 | 0.98  | -0.93 | 1.22  | -1.57 | -1.02 | -0.76 | -0.74 | -0.92 | -0.79 | -1.62 | -1.98 | -1.21 | -1.09 | -0.91 |
| 21.58  | -0.2                                 | 0.29  | 0.78  | 0.42  | 0.14  | 0.73  | -0.74 | -1.03 | -0.4  | -0.93 | -0.79 | -1.66 | 0.69  | -1.51 | 1.55  | -1.61 | -0.89 | -1.04 | -1.19 | -0.85 | -1.36 | -1.65 | -1.81 | -1.01 | -0.95 | -0.96 |
| 22.58  | 0.12                                 | 0.54  | 1.51  | 0.82  | 0.69  | 1.18  | -0.24 | -0.52 | 0.05  | -0.49 | -0.38 | -1.29 | 1.3   | -0.97 | 3.31  | -0.24 | 0.11  | -0.29 | -0.46 | 0.28  | -0.52 | -0.04 | 0.1   | 0.41  | 0.61  | 0.24  |
| 23.58  | 0.76                                 | 1.14  | 2.6   | 1.61  | 2     | 2.32  | 0.94  | 0.63  | 1.3   | 0.82  | 1.08  | 0.79  | 3.43  | 1.42  | 7.31  | 3.26  | 2.38  | 2.09  | 2.23  | 3.04  | 2.63  | 4.02  | 4.56  | 3.62  | 4.23  | 3.31  |
| 24.58  | 1.8                                  | 2.25  | 4.14  | 2.93  | 4.4   | 4.42  | 3.04  | 2.61  | 3.64  | 3.34  | 4.02  | 5.33  | 7.79  | 6.4   | 14.41 | 9.65  | 6.31  | 6.71  | 7.65  | 8.01  | 9     | 11.34 | 12.4  | 9.18  | 10.57 | 8.9   |
| 25.58  | 3.32                                 | 4.03  | 6.25  | 4.94  | 8.24  | 7.77  | 6.31  | 5.61  | 7.34  | 7.4   | 8.84  | 13.08 | 15.06 | 14.71 | 25.43 | 19.62 | 12.26 | 14.13 | 16.55 | 15.76 | 19.42 | 22.69 | 24.36 | 17.59 | 20.19 | 17.57 |
| 26.58  | 5.41                                 | 6.6   | 9.05  | 7.75  | 13.83 | 12.62 | 10.97 | 9.77  | 12.63 | 13.26 | 15.88 | 24.69 | 25.82 | 26.94 | 41.06 | 33.73 | 20.51 | 24.82 | 29.57 | 26.76 | 34.59 | 38.64 | 41.01 | 29.25 | 33.51 | 29.75 |
| 27.58  | 8.09                                 | 10.11 | 12.64 | 11.48 | 21.44 | 19.18 | 17.19 | 15.22 | 19.67 | 21.14 | 25.37 | 40.66 | 40.5  | 43.54 | 61.82 | 52.34 | 31.22 | 39.05 | 47.09 | 41.33 | 54.92 | 59.57 | 62.69 | 44.37 | 50.73 | 45.69 |
| 28.56  | 11.33                                | 14.52 | 17.02 | 16.08 | 31.04 | 27.39 | 24.89 | 21.84 | 28.31 | 30.91 | 37.13 | 60.75 | 58.88 | 64.17 | 87.34 | 74.99 | 44.11 | 56.47 | 68.73 | 59.18 | 79.89 | 84.91 | 88.79 | 62.53 | 71.3  | 64.89 |
| 29.61  | 15.45                                | 20.35 | 22.75 | 22.09 | 43.74 | 38.18 | 34.9  | 30.35 | 39.41 | 43.6  | 52.38 | 87.13 | 82.86 | 90.91 | 120.3 | 103.9 | 60.4  | 78.7  | 96.55 | 82.08 | 111.8 | 117   | 121.7 | 85.36 | 96.95 | 89.04 |
| 30.56  | 19.73                                | 26.64 | 28.93 | 28.46 | 57.38 | 49.67 | 45.47 | 39.25 | 50.96 | 56.95 | 68.32 | 115.1 | 108.1 | 118.9 | 154.7 | 133.6 | 77.08 | 101.6 | 125.4 | 105.9 | 144.7 | 150   | 155.2 | 108.6 | 122.8 | 113.5 |
| 31.63  | 25.02                                | 34.68 | 36.96 | 36.53 | 74.75 | 64.23 | 58.73 | 50.34 | 65.16 | 73.58 | 88.02 | 150   | 139.3 | 153.3 | 197.2 | 169.7 | 97.29 | 129.3 | 160.4 | 135   | 184.4 | 189.7 | 195.5 | 136.4 | 153.3 | 142.7 |
| 32.63  | 30.39                                | 43.13 | 45.59 | 44.9  | 92.82 | 79.26 | 72.32 | 61.67 | 79.32 | 90.44 | 107.8 | 185.4 | 170.7 | 187.6 | 240   | 205.4 | 117.2 | 156.3 | 194.9 | 164   | 222.9 | 228.5 | 234.5 | 163.4 | 182.4 | 170.7 |
| 33.63  | 36.02                                | 52.25 | 55.21 | 53.84 | 112.1 | 95.21 | 86.59 | 73.57 | 93.76 | 107.9 | 127.9 | 222   | 202.6 | 222.4 | 283.9 | 241.1 | 137.1 | 183   | 229   | 193.3 | 260.8 | 267   | 272.8 | 190   | 210.3 | 197.7 |
| 34.63  | 41.8                                 | 61.86 | 65.73 | 63.16 | 132   | 111.6 | 101.2 | 85.76 | 108   | 125.5 | 147.8 | 258.7 | 233.8 | 256.3 | 327.2 | 275.7 | 156.3 | 208.2 | 261.4 | 221.7 | 296.1 | 303.3 | 308.8 | 215   | 235.6 | 222.4 |
| 35.63  | 47.66                                | 71.82 | 77.03 | 72.69 | 152.1 | 128.1 | 115.7 | 98.03 | 121.6 | 142.6 | 166.7 | 294.5 | 263.2 | 288.2 | 368.6 | 308.1 | 174.3 | 231.1 | 290.8 | 248.2 | 327.5 | 336.2 | 341.1 | 237.5 | 257.6 | 244   |
| 36.63  | 53.65                                | 82.02 | 88.98 | 82.3  | 172.1 | 144.4 | 130.1 | 110.3 | 134.4 | 159.1 | 184.6 | 328.8 | 290.2 | 317.5 | 407   | 338   | 190.7 | 251.4 | 316.7 | 272   | 354.5 | 365   | 369.1 | 257.4 | 275.9 | 262   |
| 37.65  | 60.1                                 | 92.79 | 101.7 | 92.27 | 192.3 | 160.8 | 144.8 | 122.8 | 147   | 175.5 | 202.2 | 363.3 | 315.7 | 345.6 | 443.4 | 367.3 | 206.4 | 270.4 | 340.7 | 293.7 | 378.7 | 390.7 | 394.2 | 275.8 | 292.2 | 277.7 |
| 38.65  | 67.11                                | 103.9 | 114.6 | 102.4 | 212.3 | 177.1 | 159.8 | 135.6 | 159.9 | 191.8 | 220   | 398.6 | 340.5 | 373.5 | 477.8 | 397.4 | 221.9 | 289.6 | 364.4 | 313.7 | 402.7 | 414.6 | 418.3 | 294   | 308.7 | 293.3 |
| 39.65  | 75.55                                | 116.2 | 127.8 | 113.4 | 233.9 | 194.6 | 176.9 | 149.9 | 175.4 | 210.2 | 241.2 | 440.5 | 369.4 | 406.8 | 514.9 | 435.1 | 240.2 | 314.5 | 394.6 | 335.7 | 434.3 | 442.8 | 448.1 | 317   | 331.9 | 314.5 |

| F4    | F5    | F6    | F7    | F8    | F9    | G2    | G3    | G4    | G5    |
|-------|-------|-------|-------|-------|-------|-------|-------|-------|-------|
| -1.4  | -0.18 | 0.69  | -0.38 | -0.72 | 1.92  | 0.7   | -1.58 | 1.59  | -1.87 |
| -2.53 | -1.31 | -2.54 | -3.43 | -3.77 | -1.11 | -2.43 | -2.98 | -3.98 | -2.72 |
| -1.12 | -0.78 | -1.75 | -2.6  | -2.95 | -1.27 | -1.75 | -1.81 | -3.73 | -1.19 |
| 0.59  | 0.08  | 0.01  | -0.74 | -1.06 | -0.54 | -0.13 | -0.29 | -1.62 | 0.53  |
| 1.6   | 0.67  | 1.3   | 0.73  | 0.51  | 0.1   | 1.05  | 0.61  | 0.32  | 1.49  |
| 1.68  | 0.79  | 1.64  | 1.33  | 1.26  | 0.33  | 1.37  | 0.7   | 1.33  | 1.51  |
| 1.03  | 0.54  | 1.14  | 1.11  | 1.22  | 0.17  | 0.93  | 0.22  | 1.39  | 0.82  |
| 0.05  | 0.08  | 0.18  | 0.41  | 0.68  | -0.19 | 0.1   | -0.45 | 0.82  | -0.18 |
| -0.89 | -0.37 | -0.81 | -0.41 | 0     | -0.51 | -0.74 | -0.95 | 0.08  | -1.09 |
| -1.48 | -0.66 | -1.51 | -1.01 | -0.54 | -0.65 | -1.26 | -1.04 | -0.48 | -1.61 |
| -1.56 | -0.73 | -1.7  | -1.2  | -0.75 | -0.5  | -1.31 | -0.67 | -0.62 | -1.62 |
| -1.14 | -0.56 | -1.35 | -0.94 | -0.58 | -0.1  | -0.88 | 0.1   | -0.3  | -1.12 |
| -0.35 | -0.23 | -0.6  | -0.31 | -0.1  | 0.45  | -0.1  | 1.05  | 0.36  | -0.26 |
| 0.61  | 0.17  | 0.35  | 0.51  | 0.53  | 1     | 0.79  | 1.93  | 1.15  | 0.71  |
| 1.46  | 0.51  | 1.22  | 1.29  | 1.1   | 1.37  | 1.54  | 2.44  | 1.78  | 1.53  |
| 1.98  | 0.68  | 1.76  | 1.82  | 1.43  | 1.44  | 1.9   | 2.4   | 2     | 1.97  |
| 1.99  | 0.62  | 1.78  | 1.93  | 1.38  | 1.11  | 1.7   | 1.67  | 1.63  | 1.84  |
| 1.42  | 0.36  | 1.24  | 1.56  | 0.93  | 0.43  | 0.92  | 0.37  | 0.68  | 1.13  |
| 0.39  | -0.01 | 0.26  | 0.81  | 0.21  | -0.46 | -0.3  | -1.24 | -0.68 | -0.04 |
| -0.86 | -0.27 | -0.86 | -0.07 | -0.52 | -1.29 | -1.62 | -2.72 | -2.08 | -1.37 |
| -1.89 | -0.14 | -1.64 | -0.66 | -0.84 | -1.67 | -2.55 | -3.41 | -2.92 | -2.39 |
| -2.15 | 0.77  | -1.44 | -0.41 | -0.19 | -1.1  | -2.41 | -2.53 | -2.44 | -2.49 |
| -0.96 | 2.9   | 0.51  | 1.33  | 2.07  | 0.96  | -0.42 | 0.81  | 0.24  | -0.96 |
| 2.42  | 6.72  | 5.02  | 5.29  | 6.62  | 5.08  | 4.24  | 7.48  | 6.07  | 2.97  |
| 8.71  | 12.69 | 12.91 | 12.17 | 14.15 | 11.81 | 12.37 | 18.31 | 15.93 | 10.03 |
| 18.56 | 21.21 | 24.88 | 22.59 | 25.22 | 21.57 | 24.68 | 33.93 | 30.59 | 20.86 |
| 32.45 | 32.6  | 41.44 | 37.02 | 40.25 | 34.64 | 41.65 | 54.72 | 50.56 | 35.9  |
| 50.63 | 47    | 62.84 | 55.68 | 59.41 | 51.08 | 63.49 | 80.7  | 75.99 | 55.35 |
| 72.57 | 64.02 | 88.36 | 77.96 | 82.02 | 70.26 | 89.44 | 110.8 | 105.9 | 78.5  |
| 100.2 | 85.17 | 120.2 | 105.7 | 110   | 93.63 | 121.6 | 147.1 | 142.7 | 107.2 |
| 128.2 | 106.6 | 152.1 | 133.7 | 137.8 | 116.6 | 153.8 | 182.5 | 179   | 135.9 |
| 161.5 | 132.1 | 189.7 | 166.7 | 170.5 | 143.2 | 191.5 | 222.8 | 221.1 | 169.5 |
| 193.5 | 156.9 | 225.4 | 198   | 201.3 | 167.8 | 226.9 | 259.4 | 259.9 | 200.9 |
| 224.6 | 181.4 | 259.4 | 227.8 | 230.5 | 190.7 | 260.3 | 292.6 | 295.7 | 230.4 |
| 253.1 | 204.6 | 290   | 254.7 | 256.6 | 210.9 | 289.9 | 320.4 | 326.4 | 256.2 |
| 278.2 | 225.8 | 316   | 277.5 | 278.9 | 227.8 | 314.5 | 341.9 | 350.5 | 277.2 |
| 299.5 | 244.6 | 337.2 | 296   | 297.1 | 241.6 | 333.6 | 357.1 | 368.1 | 293.1 |
| 318.5 | 261.7 | 355.5 | 311.7 | 313.2 | 254.6 | 349.1 | 368.9 | 381.2 | 305.4 |
| 337.5 | 278   | 373.9 | 327.2 | 330.1 | 269.7 | 364.1 | 382.1 | 394.6 | 317   |
| 363.2 | 296.9 | 400.5 | 349.4 | 355.2 | 294.2 | 386.5 | 407.1 | 418.2 | 335.1 |

|                |       | baseline subtracted fluorescence ratio |       |       |       |       |       |       |       |       |       |       |       |       |       |       |       |       |       |       |       |       |       |       |       |       |       |       |  |
|----------------|-------|----------------------------------------|-------|-------|-------|-------|-------|-------|-------|-------|-------|-------|-------|-------|-------|-------|-------|-------|-------|-------|-------|-------|-------|-------|-------|-------|-------|-------|--|
| FAM            | 25.58 | 19.92                                  | 29.68 | 37.59 | 26.99 | 30    | 28.48 | 23.71 | 26.33 | 18.78 | 19.08 | 24.95 | 16.6  | 16.59 | 23.51 | 25.07 | 21.93 | 13.57 | 14.5  | 10.39 | 12.48 | 12    | 9.14  | 9.65  | 9.94  | 7.09  | 5.92  | 4.99  |  |
|                | 26.58 | 37.79                                  | 54.64 | 67.95 | 50.61 | 55.56 | 53.38 | 47.73 | 46.64 | 34.06 | 36.94 | 39.69 | 33.91 | 33.36 | 44.49 | 45.79 | 41.82 | 23.73 | 26.59 | 21.97 | 25.79 | 23.62 | 20.69 | 19.74 | 19.76 | 15.04 | 12.6  | 12.39 |  |
|                | 27.58 | 60.62                                  | 86.97 | 107.1 | 81.33 | 88.84 | 85.48 | 78.94 | 72.58 | 53.7  | 60.27 | 58.38 | 56.84 | 55.49 | 72.1  | 72.64 | 67.15 | 36.77 | 42.35 | 37.25 | 43.5  | 38.93 | 36.1  | 32.89 | 32.56 | 25.4  | 21.7  | 22.15 |  |
|                | 28.56 | 87.65                                  | 125.7 | 154   | 118.3 | 129   | 123.8 | 116.3 | 103.3 | 77.16 | 88.5  | 80.56 | 84.87 | 82.45 | 105.7 | 104.8 | 97.11 | 52.44 | 61.43 | 55.89 | 65.24 | 57.62 | 55.03 | 48.8  | 48.02 | 37.93 | 33.11 | 34.09 |  |
|                | 29.61 | 121.2                                  | 174.5 | 213   | 164.8 | 179.6 | 171.9 | 162.9 | 141.4 | 106.6 | 124.4 | 108.4 | 120.8 | 116.9 | 148.4 | 145.3 | 134.4 | 72.38 | 85.82 | 79.76 | 93.16 | 81.59 | 79.41 | 69.06 | 67.62 | 53.88 | 48.02 | 49.49 |  |
|                | 30.56 | 155                                    | 224.2 | 273.4 | 212.4 | 231.5 | 220.8 | 210   | 179.7 | 136.8 | 161.4 | 136.8 | 158   | 152.4 | 192.6 | 186.7 | 172.1 | 93.14 | 111.2 | 104.6 | 122.2 | 106.6 | 104.9 | 90.06 | 87.79 | 70.43 | 63.78 | 65.69 |  |
|                | 31.63 | 195.3                                  | 284.2 | 346.6 | 269.8 | 294.5 | 279.6 | 266   | 225.2 | 173.3 | 206.8 | 171.5 | 203.9 | 196   | 246.6 | 236.7 | 217.2 | 119   | 142.8 | 135.2 | 158   | 137.5 | 136.4 | 116   | 112.4 | 90.87 | 83.52 | 86.04 |  |
|                | 32.63 | 234.2                                  | 342.9 | 418.8 | 326.2 | 356.4 | 337   | 319.7 | 269   | 209.4 | 252   | 206.1 | 249.7 | 239.4 | 300.2 | 285.8 | 261.3 | 145.5 | 174.7 | 166   | 193.9 | 168.7 | 168.2 | 142   | 137   | 111.5 | 103.6 | 107   |  |
|                |       |                                        |       |       |       |       |       |       |       |       |       |       |       |       |       |       |       |       |       |       |       |       |       |       |       |       |       |       |  |
| VIC            | 25.58 | 3.32                                   | 4.03  | 6.25  | 4.94  | 8.24  | 7.77  | 6.31  | 5.61  | 7.34  | 7.4   | 8.84  | 13.08 | 15.06 | 14.71 | 25.43 | 19.62 | 12.26 | 14.13 | 16.55 | 15.76 | 19.42 | 22.69 | 24.36 | 17.59 | 20.19 | 17.57 | 18.56 |  |
|                | 26.58 | 5.41                                   | 6.6   | 9.05  | 7.75  | 13.83 | 12.62 | 10.97 | 9.77  | 12.63 | 13.26 | 15.88 | 24.69 | 25.82 | 26.94 | 41.06 | 33.73 | 20.51 | 24.82 | 29.57 | 26.76 | 34.59 | 38.64 | 41.01 | 29.25 | 33.51 | 29.75 | 32.45 |  |
|                | 27.58 | 8.09                                   | 10.11 | 12.64 | 11.48 | 21.44 | 19.18 | 17.19 | 15.22 | 19.67 | 21.14 | 25.37 | 40.66 | 40.5  | 43.54 | 61.82 | 52.34 | 31.22 | 39.05 | 47.09 | 41.33 | 54.92 | 59.57 | 62.69 | 44.37 | 50.73 | 45.69 | 50.63 |  |
|                | 28.56 | 11.33                                  | 14.52 | 17.02 | 16.08 | 31.04 | 27.39 | 24.89 | 21.84 | 28.31 | 30.91 | 37.13 | 60.75 | 58.88 | 64.17 | 87.34 | 74.99 | 44.11 | 56.47 | 68.73 | 59.18 | 79.89 | 84.91 | 88.79 | 62.53 | 71.3  | 64.89 | 72.57 |  |
|                | 29.61 | 15.45                                  | 20.35 | 22.75 | 22.09 | 43.74 | 38.18 | 34.9  | 30.35 | 39.41 | 43.6  | 52.38 | 87.13 | 82.86 | 90.91 | 120.3 | 103.9 | 60.4  | 78.7  | 96.55 | 82.08 | 111.8 | 117   | 121.7 | 85.36 | 96.95 | 89.04 | 100.2 |  |
|                | 30.56 | 19.73                                  | 26.64 | 28.93 | 28.46 | 57.38 | 49.67 | 45.47 | 39.25 | 50.96 | 56.95 | 68.32 | 115.1 | 108.1 | 118.9 | 154.7 | 133.6 | 77.08 | 101.6 | 125.4 | 105.9 | 144.7 | 150   | 155.2 | 108.6 | 122.8 | 113.5 | 128.2 |  |
|                | 31.63 | 25.02                                  | 34.68 | 36.96 | 36.53 | 74.75 | 64.23 | 58.73 | 50.34 | 65.16 | 73.58 | 88.02 | 150   | 139.3 | 153.3 | 197.2 | 169.7 | 97.29 | 129.3 | 160.4 | 135   | 184.4 | 189.7 | 195.5 | 136.4 | 153.3 | 142.7 | 161.5 |  |
|                | 32.63 | 30.39                                  | 43.13 | 45.59 | 44.9  | 92.82 | 79.26 | 72.32 | 61.67 | 79.32 | 90.44 | 107.8 | 185.4 | 170.7 | 187.6 | 240   | 205.4 | 117.2 | 156.3 | 194.9 | 164   | 222.9 | 228.5 | 234.5 | 163.4 | 182.4 | 170.7 | 193.5 |  |
|                |       |                                        |       |       |       |       |       |       |       |       |       |       |       |       |       |       |       |       |       |       |       |       |       |       |       |       |       |       |  |
| linear regress | 7.945 | 8.02                                   | 9.759 | 7.511 | 3.861 | 4.317 | 4.499 | 4.343 | 2.643 | 2.802 | 1.823 | 1.35  | 1.429 | 1.597 | 1.215 | 1.286 | 1.251 | 1.121 | 0.869 | 1.223 | 0.766 | 0.771 | 0.628 | 0.869 | 0.64  | 0.636 | 0.579 |       |  |

|       |       |       |       |       |       |       |       |       |
|-------|-------|-------|-------|-------|-------|-------|-------|-------|
|       |       |       |       |       |       |       |       |       |
| 2.46  | 1.52  | -4.36 | 3.63  | 5.22  | -5.52 | -6.27 | -4.43 | -5.75 |
| 8.59  | 6.57  | 0.63  | 8.88  | 10.41 | -4.61 | -4.19 | -2.93 | -4.65 |
| 16.8  | 13.34 | 7.36  | 15.81 | 17.02 | -2.99 | -1.21 | -0.46 | -2.75 |
| 26.95 | 21.72 | 15.58 | 24.27 | 24.8  | -0.59 | 2.63  | 2.98  | -0.06 |
| 40.14 | 32.61 | 26.03 | 35.04 | 34.44 | 3     | 7.76  | 7.87  | 3.72  |
| 54.11 | 44.16 | 36.73 | 46.15 | 44.12 | 7.24  | 13.32 | 13.41 | 7.92  |
| 71.75 | 58.77 | 49.69 | 59.69 | 55.64 | 13.17 | 20.48 | 20.79 | 13.37 |
| 90    | 73.96 | 62.47 | 73.1  | 66.78 | 19.9  | 28.07 | 28.8  | 19.09 |
|       |       |       |       |       |       |       |       |       |
| 21.21 | 24.88 | 22.59 | 25.22 | 21.57 | 24.68 | 33.93 | 30.59 | 20.86 |
| 32.6  | 41.44 | 37.02 | 40.25 | 34.64 | 41.65 | 54.72 | 50.56 | 35.9  |
| 47    | 62.84 | 55.68 | 59.41 | 51.08 | 63.49 | 80.7  | 75.99 | 55.35 |
| 64.02 | 88.36 | 77.96 | 82.02 | 70.26 | 89.44 | 110.8 | 105.9 | 78.5  |
| 85.17 | 120.2 | 105.7 | 110   | 93.63 | 121.6 | 147.1 | 142.7 | 107.2 |
| 106.6 | 152.1 | 133.7 | 137.8 | 116.6 | 153.8 | 182.5 | 179   | 135.9 |
| 132.1 | 189.7 | 166.7 | 170.5 | 143.2 | 191.5 | 222.8 | 221.1 | 169.5 |
| 156.9 | 225.4 | 198   | 201.3 | 167.8 | 226.9 | 259.4 | 259.9 | 200.9 |
|       |       |       |       |       |       |       |       |       |
|       |       |       |       |       |       |       |       |       |
| 0.643 | 0.359 | 0.381 | 0.394 | 0.42  | 0.16  | 0.183 | 0.167 | 0.164 |
