# Supplementary material for: Quantify single nucleotide polymorphism (SNP) ratio in pooled DNA based on normalized fluorescence real-time PCR
Source: PubMed Central journal article supplement (PMC1552069; doi:10.1186/1471-2164-7-143), 2006-06-09
Supplement: 1471-2164-7-143-S7.pdf [file 1471-2164-7-143-S7.pdf]

| FAM | Well | Ct    | average Ct of each allele | VIC | Well  | Ct       | average Ct of each allele | $\Delta Ct$ | $2^{-\Delta Ct}$ | Av.( $2^{-\Delta Ct}$ ) | SD. ( $2^{-\Delta Ct}$ ) | predefined ratio |
|-----|------|-------|---------------------------|-----|-------|----------|---------------------------|-------------|------------------|-------------------------|--------------------------|------------------|
|     | B5   | 29.19 | 29.17                     |     | C2    | 30.49    | 30.55                     | -1.30001    | 2.46             | 2.62                    | 0.36                     | 9                |
|     | B6   | 29.43 |                           | C3  | 31.04 | -1.60122 |                           | 3.03        |                  |                         |                          |                  |
|     | B7   | 28.89 |                           | C4  | 30.13 | -1.24097 |                           | 2.36        |                  |                         |                          |                  |
|     |      |       |                           | C5  |       |          |                           |             |                  |                         |                          |                  |
|     |      |       |                           |     |       |          |                           |             |                  |                         |                          |                  |
|     | B8   | 28.91 | 29.13                     |     | B8    | 30.31    | 30.25                     | -1.40021    | 2.64             | 2.22                    | 0.59                     | 4                |
|     | B9   | 29.34 |                           | B9  | 30.19 | -0.84846 |                           | 1.80        |                  |                         |                          |                  |
|     |      |       |                           |     |       |          |                           |             |                  |                         |                          |                  |
|     | C3   | 29.67 | 29.65                     |     | C3    | 30.43    | 30.34                     | -0.76143    | 1.70             | 1.63                    | 0.19                     | 2.33333333       |
|     | C4   | 29.67 |                           | C4  | 30.50 | -0.83047 |                           | 1.78        |                  |                         |                          |                  |
|     | C5   | 29.61 |                           | C5  | 30.10 | -0.4948  |                           | 1.41        |                  |                         |                          |                  |
|     | C6   | 29.73 | 29.62                     |     | C6    | 30.16    | 29.99                     | -0.42628    | 1.34             | 1.29                    | 0.05                     | 1.5              |
|     | C7   | 29.66 |                           | C7  | 30.00 | -0.34045 |                           | 1.27        |                  |                         |                          |                  |
|     | C8   | 29.46 |                           | C8  | 29.80 | -0.33776 |                           | 1.26        |                  |                         |                          |                  |
|     | C9   | 29.48 | 29.90                     |     | C9    | 29.50    | 29.65                     | -0.01561    | 1.01             | 0.85                    | 0.19                     | 1                |
|     | D2   | 30.13 |                           | D2  | 29.49 | 0.6342   |                           | 0.64        |                  |                         |                          |                  |
|     | D3   | 30.09 |                           | D3  | 29.95 | 0.140832 |                           | 0.91        |                  |                         |                          |                  |
|     | D4   | 30.63 | 30.16                     |     | D4    | 29.19    | 29.46                     | 1.445151    | 0.37             | 0.66                    | 0.25                     | 0.66666667       |
|     | D5   | 29.99 |                           | D5  | 29.65 | 0.336315 |                           | 0.79        |                  |                         |                          |                  |
|     | D6   | 29.86 |                           | D6  | 29.55 | 0.309825 |                           | 0.81        |                  |                         |                          |                  |
|     | D7   | 29.83 | 30.23                     |     | D7    | 29.06    | 29.34                     | 0.76997     | 0.59             | 0.54                    | 0.04                     | 0.428571429      |
|     | D8   | 30.51 |                           | D8  | 29.53 | 0.981767 |                           | 0.51        |                  |                         |                          |                  |
|     | D9   | 30.36 |                           | D9  | 29.44 | 0.916065 |                           | 0.53        |                  |                         |                          |                  |
|     | E2   | 30.24 | 30.62                     |     | E2    | 28.76    | 29.03                     | 1.486783    | 0.36             | 0.34                    | 0.05                     | 0.25             |
|     | E3   | 30.64 |                           | E3  | 29.19 | 1.446548 |                           | 0.37        |                  |                         |                          |                  |
|     | E4   | 30.97 |                           | E4  | 29.15 | 1.823193 |                           | 0.28        |                  |                         |                          |                  |
|     | E5   | 37.35 | 33.37                     |     | E5    | 29.14    | 29.11                     | 8.218469    | 0.00             | 0.15                    | 0.14                     | 0.11111111       |
|     | E6   | 31.86 |                           | E6  | 29.06 | 2.792484 |                           | 0.14        |                  |                         |                          |                  |
|     | E7   | 30.91 |                           | E7  | 29.13 | 1.779733 |                           | 0.29        |                  |                         |                          |                  |
